# Supplementary material for: Physiological febrile heat stress increases cytoadhesion through increased protein trafficking of Plasmodium falciparum surface proteins into the red blood cell
Source: eLife journal article supplement (doi:10.7554/elife.107860), 2025-08-28

### Figure 3 – Supplement 3 – Source Data 1

Uncropped agarose DNA gel showing PCR products used to assess the integration of HSP70x-3xHA. The red boxed area indicates the region presented in the manuscript. For completeness, a higher-contrast image of the same gel is also provided below.

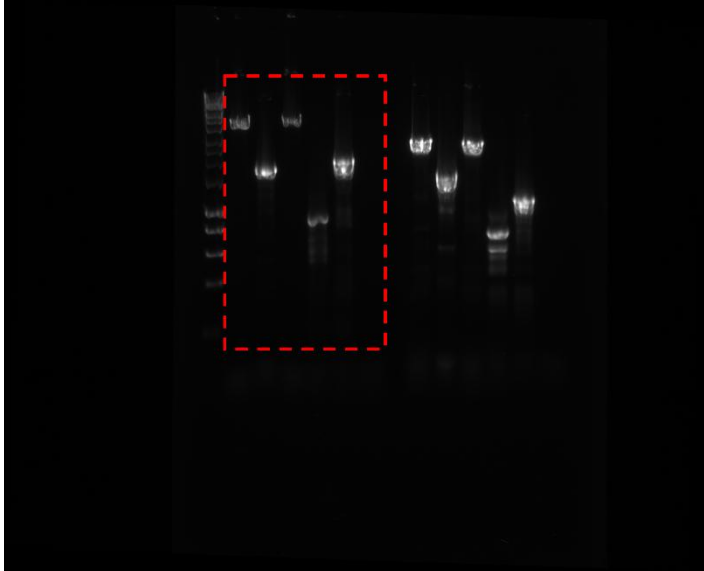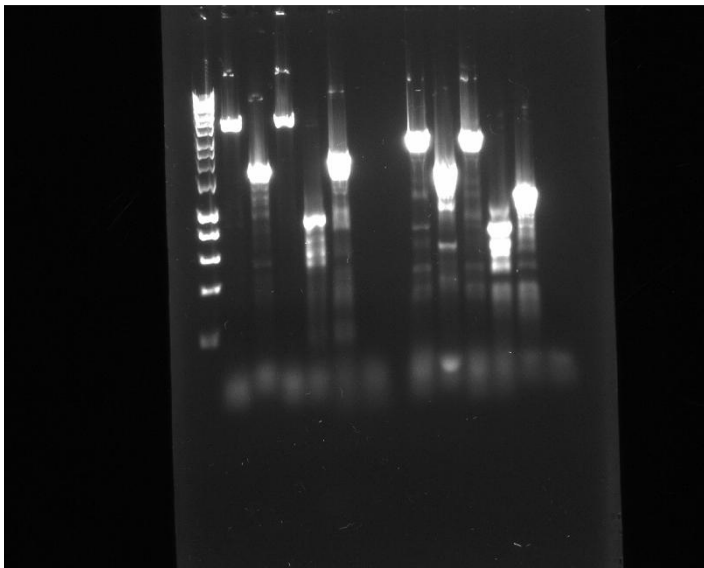

Supplement: fig3-figsupp3-data4 [file elife-107860-fig3-figsupp3-data4-v1.pdf]
