# Supplementary material for: Physiological febrile heat stress increases cytoadhesion through increased protein trafficking of Plasmodium falciparum surface proteins into the red blood cell
Source: eLife journal article supplement (doi:10.7554/elife.107860), 2025-08-28

### Figure 3 – Supplement 4 – Source Data 1

Uncropped immunofluorescence microscopy images showing HSP70x-3xHA detected with anti-HA (488 nm), SBP1 detected with anti-SBP1 (594 nm), parasite DNA stained with DAPI and the corresponding DIC images. Channels are shown separately.

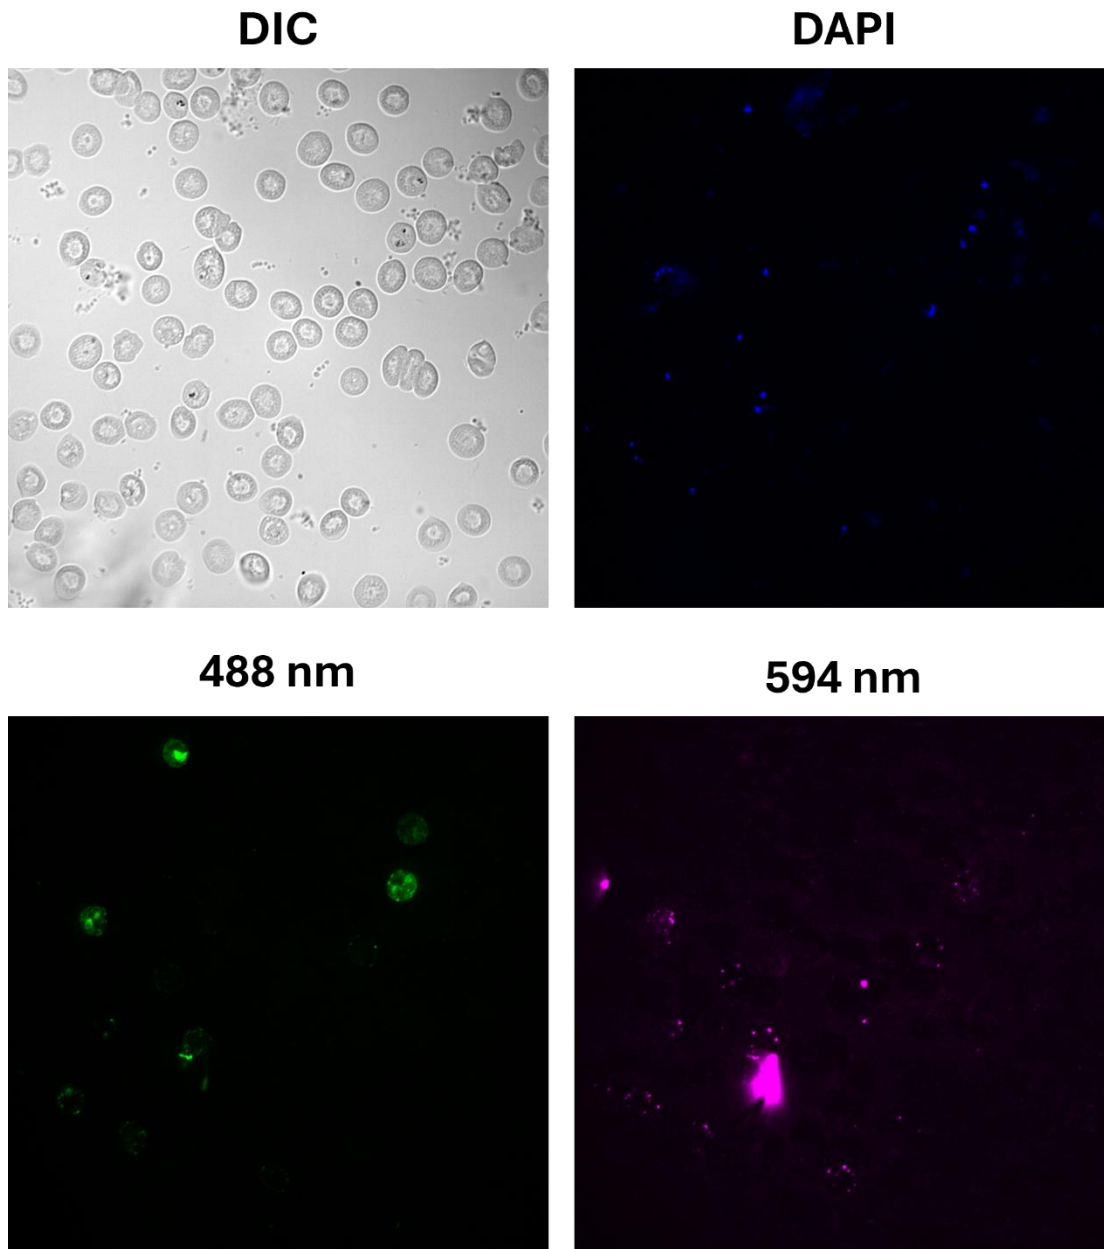

**DIC**

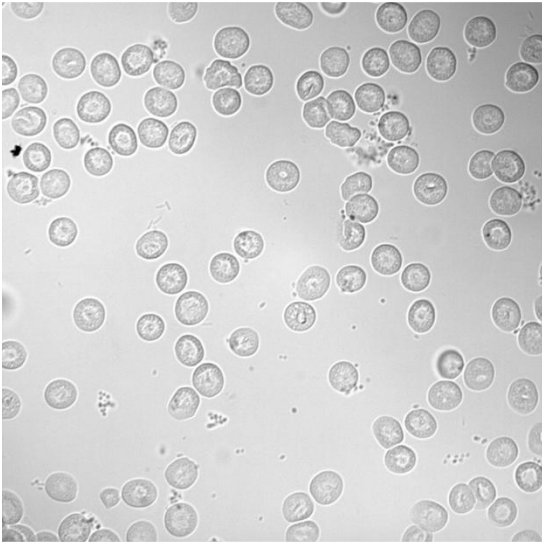

**DAPI**

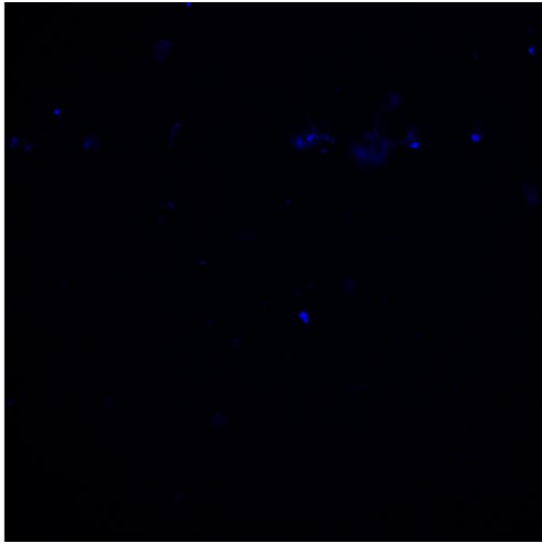

**488 nm**

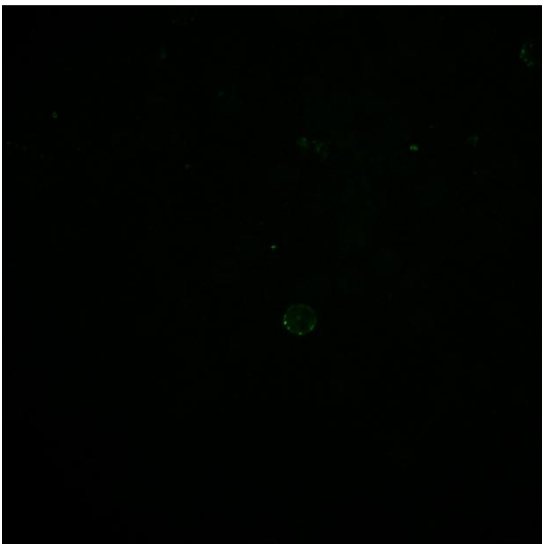

**594 nm**

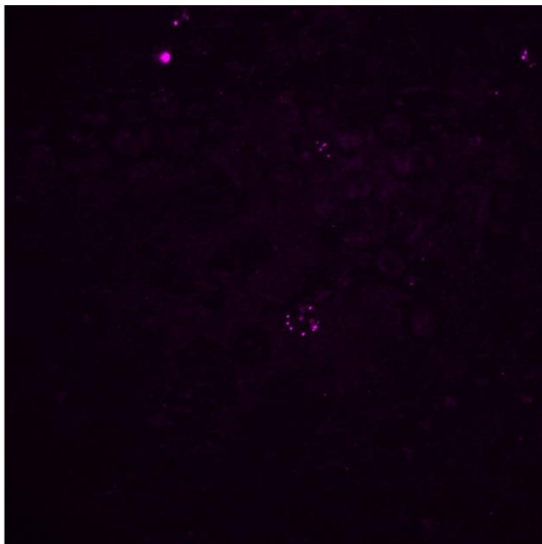

**DIC**

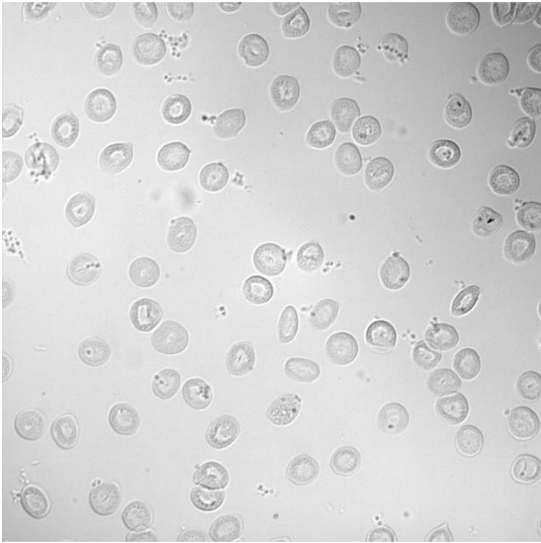

**DAPI**

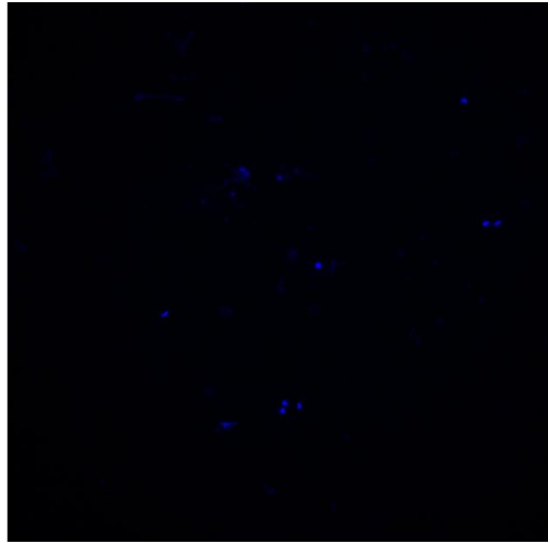

**488 nm**

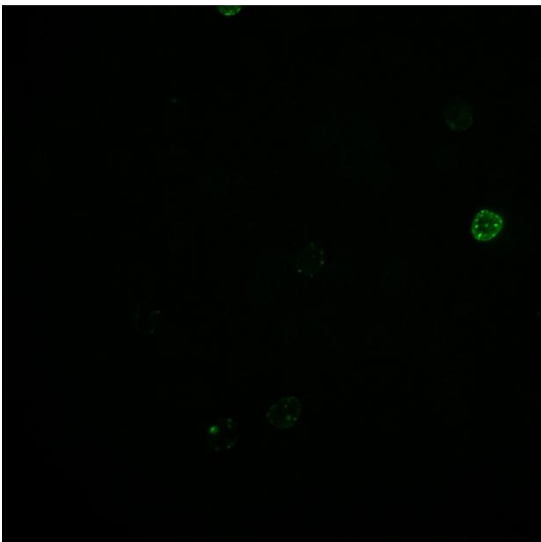

**594 nm**

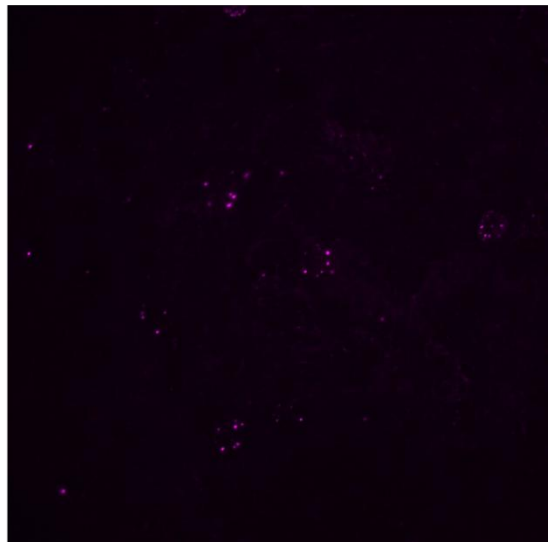

Supplement: fig3-figsupp4-data3 [file elife-107860-fig3-figsupp4-data3-v1.pdf]
