# Supplementary material for: Physiological febrile heat stress increases cytoadhesion through increased protein trafficking of Plasmodium falciparum surface proteins into the red blood cell
Source: eLife journal article supplement (doi:10.7554/elife.107860), 2025-08-28

### Figure 3 - Supplement 5 - Source Data 2

Uncropped nitrocellulose membrane immunoblotted with anti-HA showing DMSO and RAP-treated HSP70x-3xHA parasite lysates alongside the wild-type parental strain (*Plasmodium falciparum* NF54 DiCre) lysate. The red boxed area indicates the region presented in the manuscript.

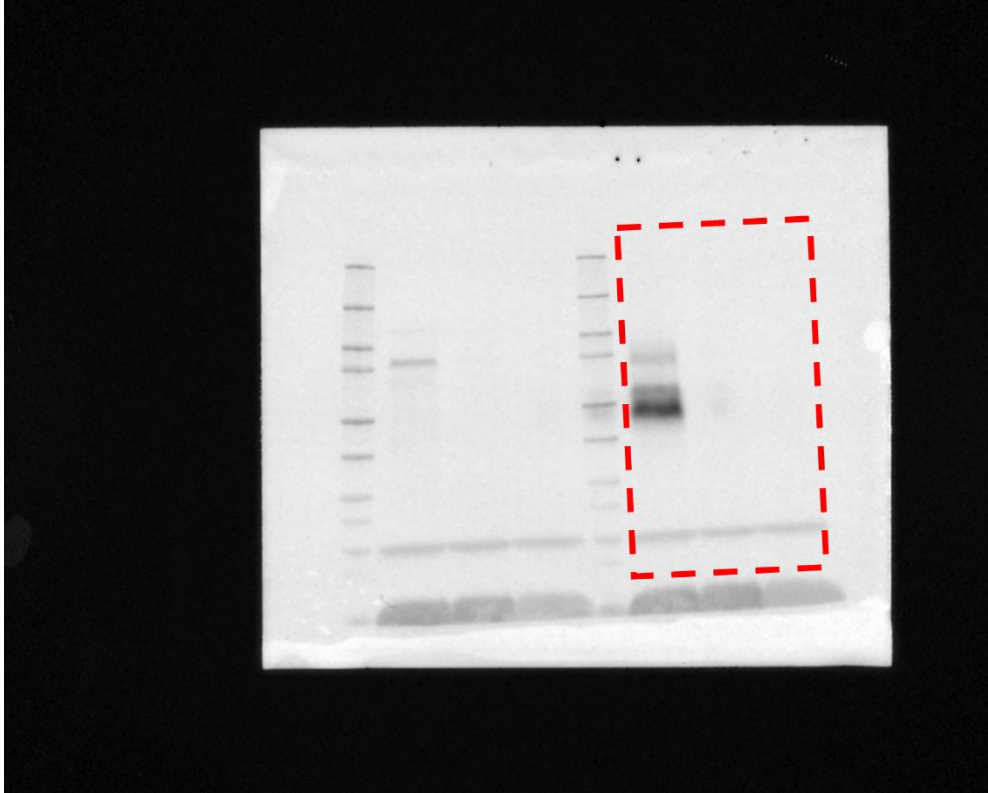

Supplement: fig3-figsupp5-data5 [file elife-107860-fig3-figsupp5-data5-v1.pdf]
