# Supplementary material for: Physiological febrile heat stress increases cytoadhesion through increased protein trafficking of Plasmodium falciparum surface proteins into the red blood cell
Source: eLife journal article supplement (doi:10.7554/elife.107860), 2025-08-28

### Figure 3 - Supplement 5 - Source Data 3

Uncropped nitrocellulose membrane showing total protein content detected using the VersaBlot™ Total Protein Normalization Kit CF-680T, including DMSO and RAP-treated PF3D7\_0702500-3xHA parasite lysates alongside the wild-type parental strain (*Plasmodium falciparum* NF54 DiCre) lysate. The red boxed area indicates the region presented in the manuscript.

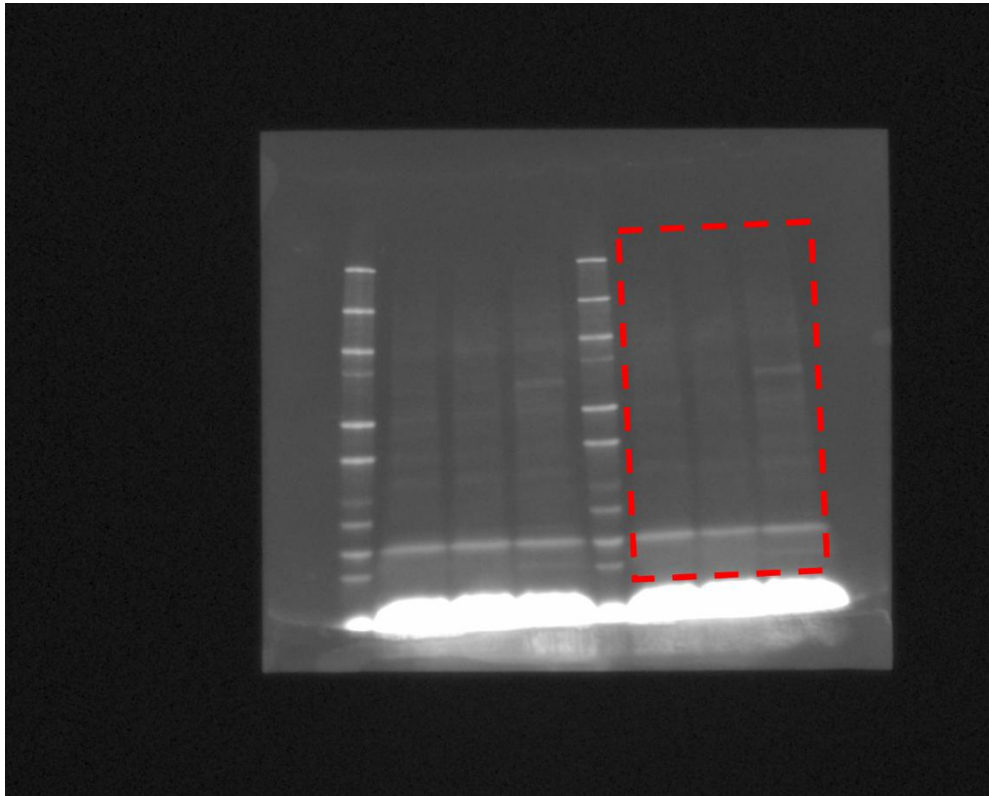

Supplement: fig3-figsupp5-data6 [file elife-107860-fig3-figsupp5-data6-v1.pdf]
