# Supplementary material for: Physiological febrile heat stress increases cytoadhesion through increased protein trafficking of Plasmodium falciparum surface proteins into the red blood cell
Source: eLife journal article supplement (doi:10.7554/elife.107860), 2025-08-28

### Figure 3 – Supplement 6 – Source Data 2

Uncropped immunofluorescence microscopy images showing PF3D7\_0702500-3xHA detected with anti-HA (488 nm), KAHRP detected with anti-KAHRP (594 nm), parasite DNA stained with DAPI and the corresponding DIC images. Channels are shown separately.

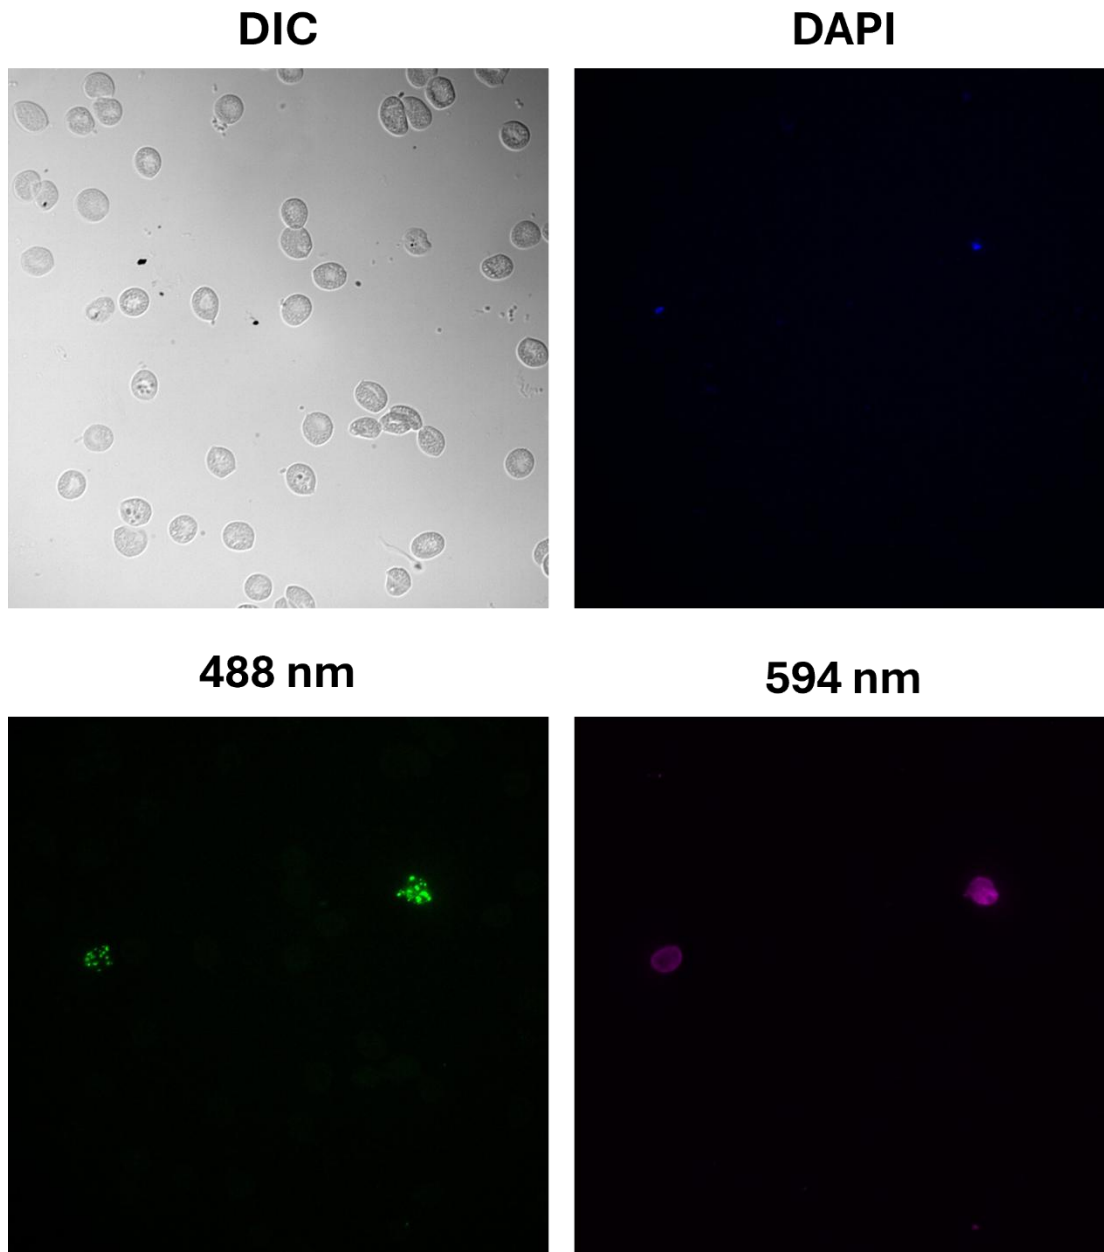

**DIC**

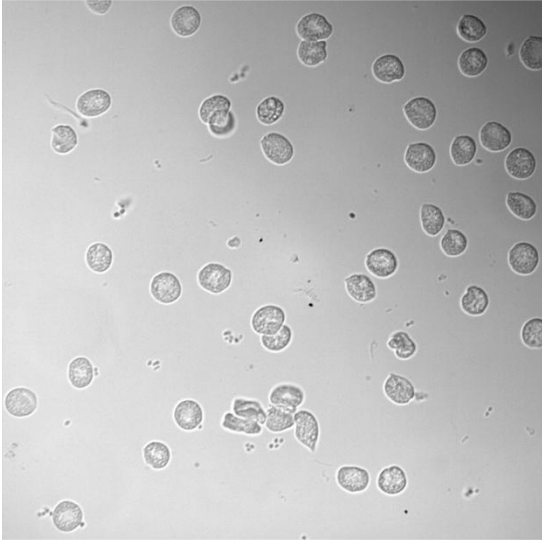

**DAPI**

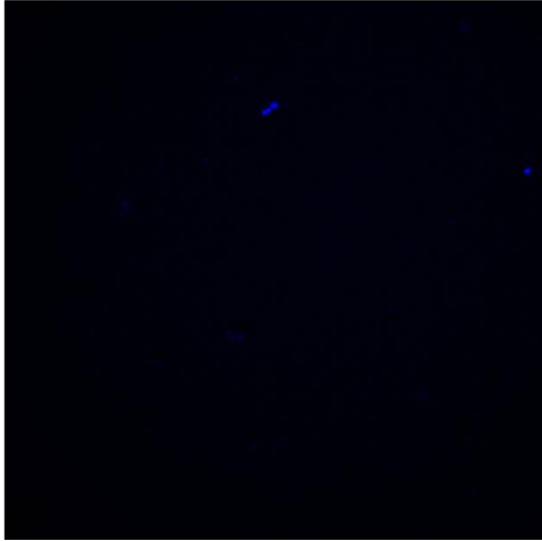

**488 nm**

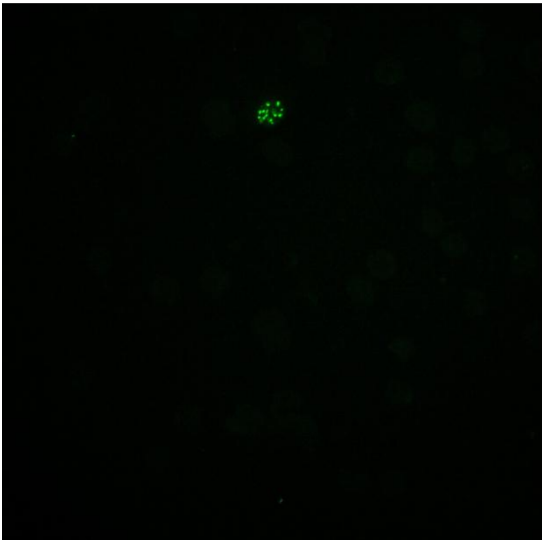

**594 nm**

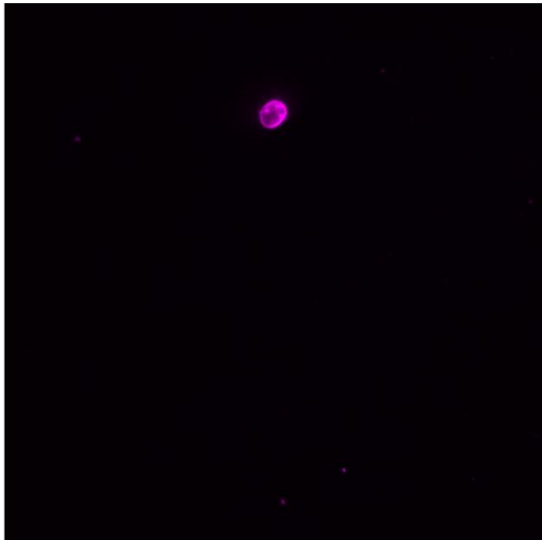

**DIC**

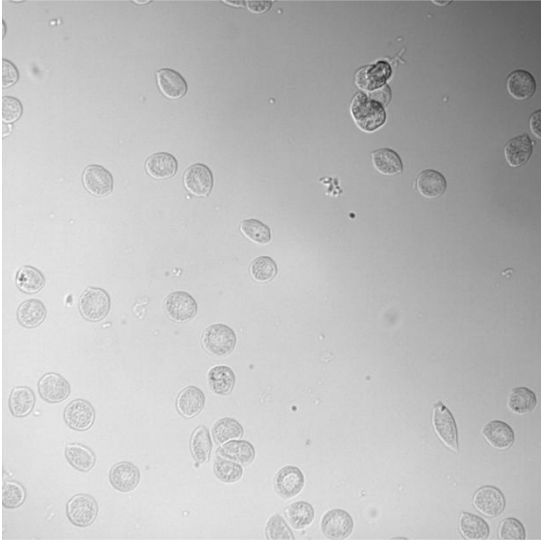

**DAPI**

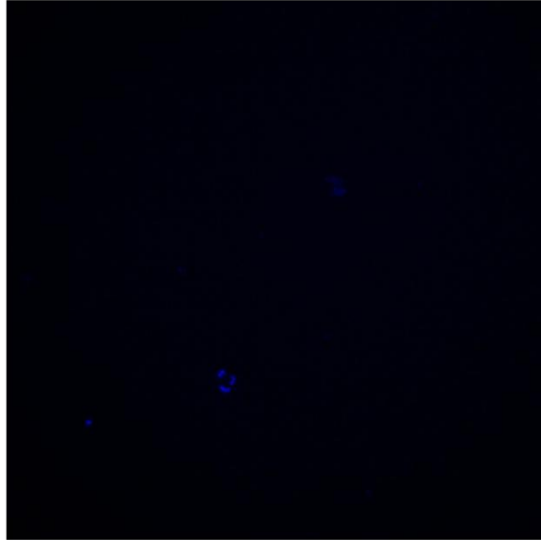

**488 nm**

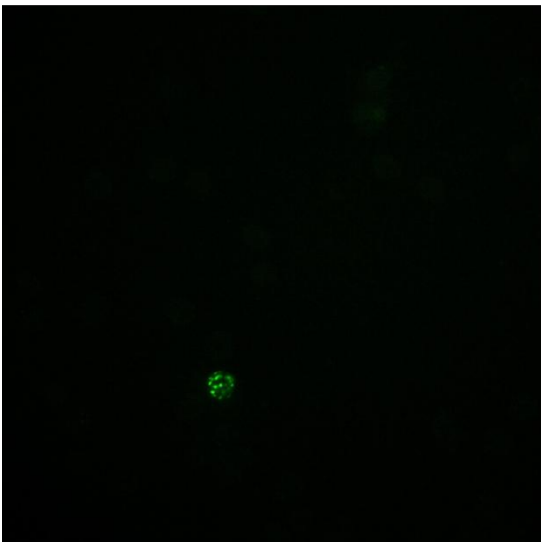

**594 nm**

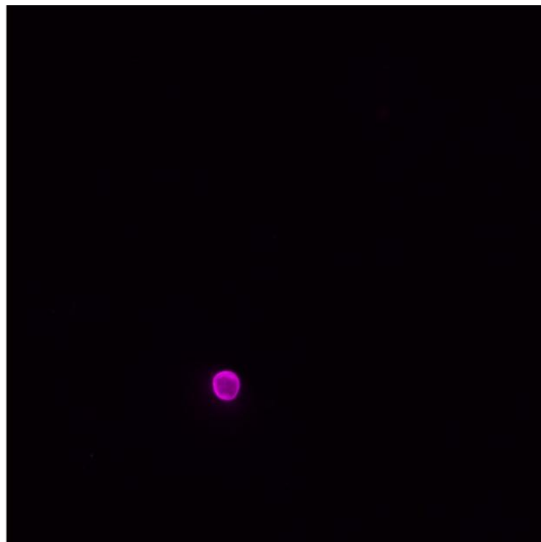

Supplement: fig3-figsupp6-data4 [file elife-107860-fig3-figsupp6-data4-v1.pdf]
