# Supplementary material for: Physiological febrile heat stress increases cytoadhesion through increased protein trafficking of Plasmodium falciparum surface proteins into the red blood cell
Source: eLife journal article supplement (doi:10.7554/elife.107860), 2025-08-28

### Figure 4 – Supplement 1 – Source Data 3

Uncropped agarose DNA gel showing PCR products used to assess the correction integration of FIKK10.2-TurboID. The red boxed area indicates the region presented in the manuscript.

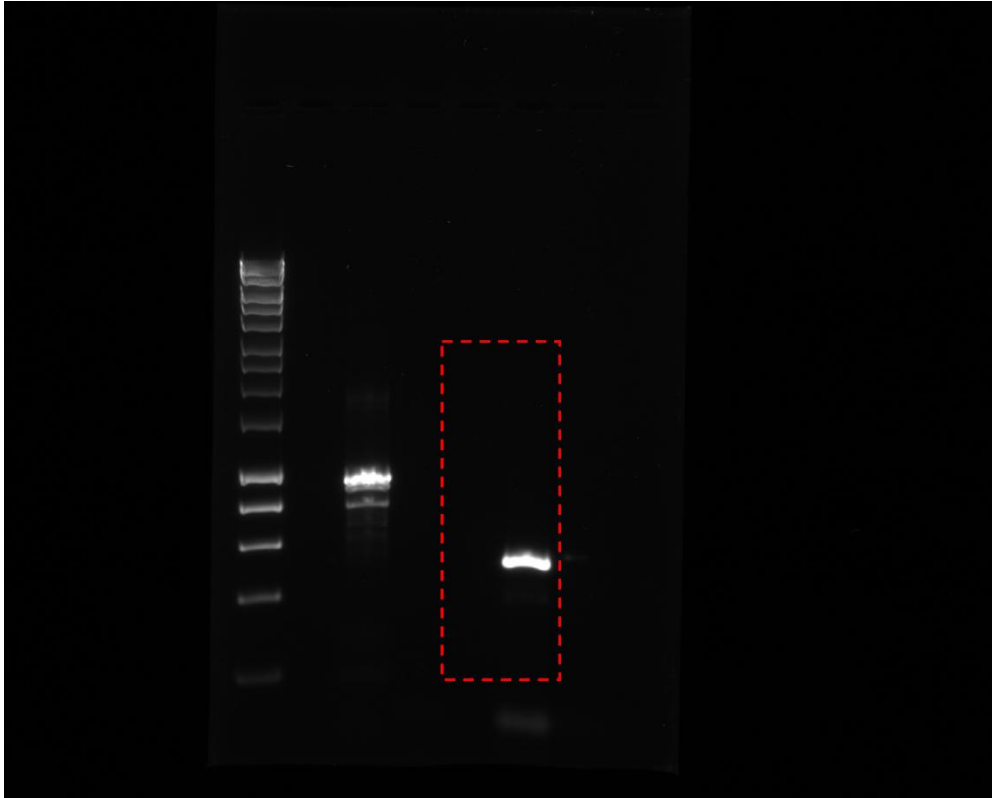

Supplement: fig4-figsupp1-data8 [file elife-107860-fig4-figsupp1-data8-v1.pdf]
