# Supplementary material for: Physiological febrile heat stress increases cytoadhesion through increased protein trafficking of Plasmodium falciparum surface proteins into the red blood cell
Source: eLife journal article supplement (doi:10.7554/elife.107860), 2025-08-28

## Figure 4 - Supplement 1 - Source Data 5

Uncropped nitrocellulose membrane showing total protein content detected using the VersaBlot™ Total Protein Normalization Kit CF-680T, including FIKK10.2-TuboID expressing parasite lysates alongside the wild-type parental strain (*Plasmodium falciparum* NF54 DiCre) lysate. The red boxed area indicates the region presented in the manuscript. For completeness, a higher-contrast image of the same blot is also provided below.

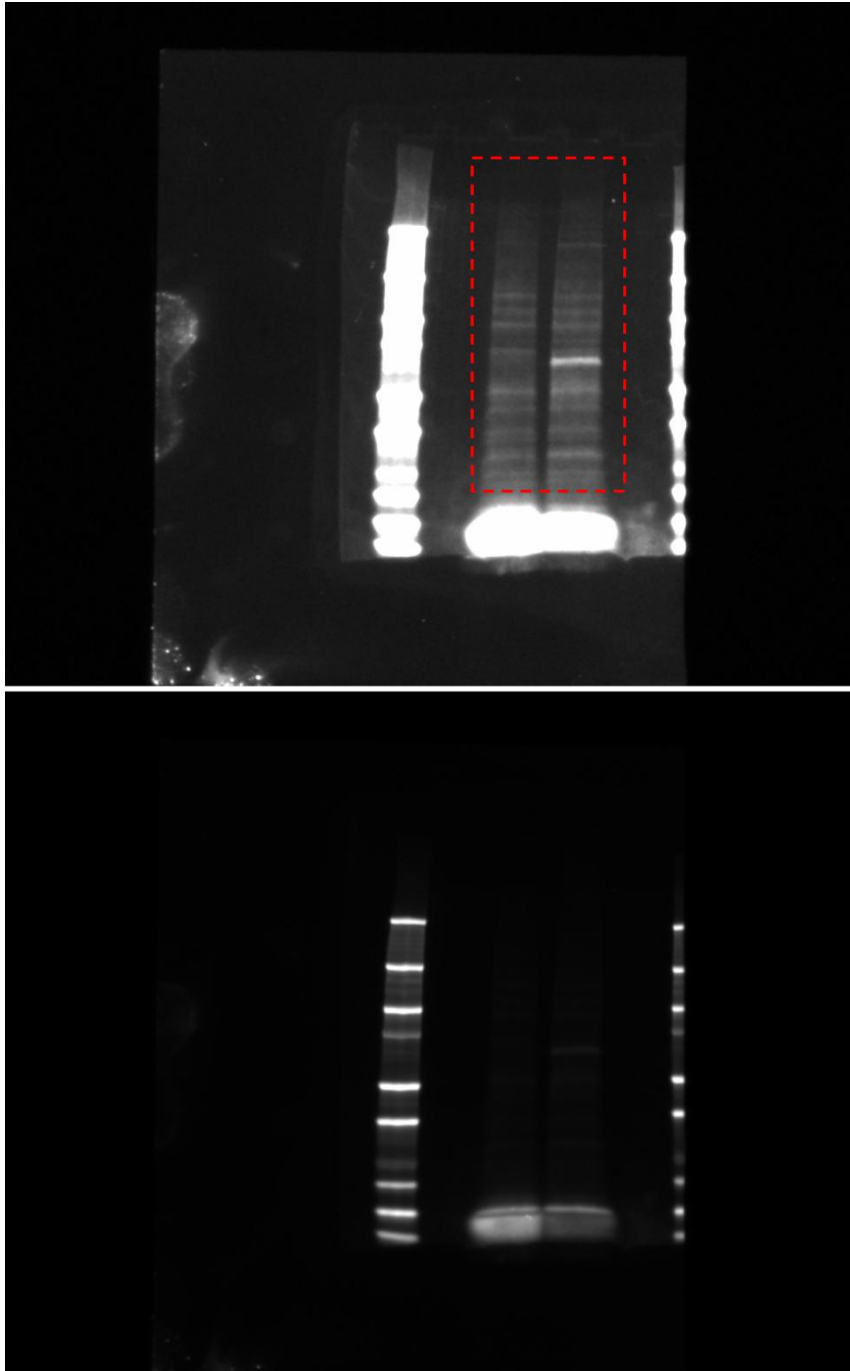

Supplement: fig4-figsupp1-data10 [file elife-107860-fig4-figsupp1-data10-v1.pdf]
