# Supplementary material for: Physiological febrile heat stress increases cytoadhesion through increased protein trafficking of Plasmodium falciparum surface proteins into the red blood cell
Source: eLife journal article supplement (doi:10.7554/elife.107860), 2025-08-28

## Figure 5 – Supplement 1 – Source Data 1

Uncropped agarose DNA gel showing PCR products used to assess the 5' integration of VAR2CSA-TurboID-3xHA. The red boxed area indicates the region presented in the manuscript.

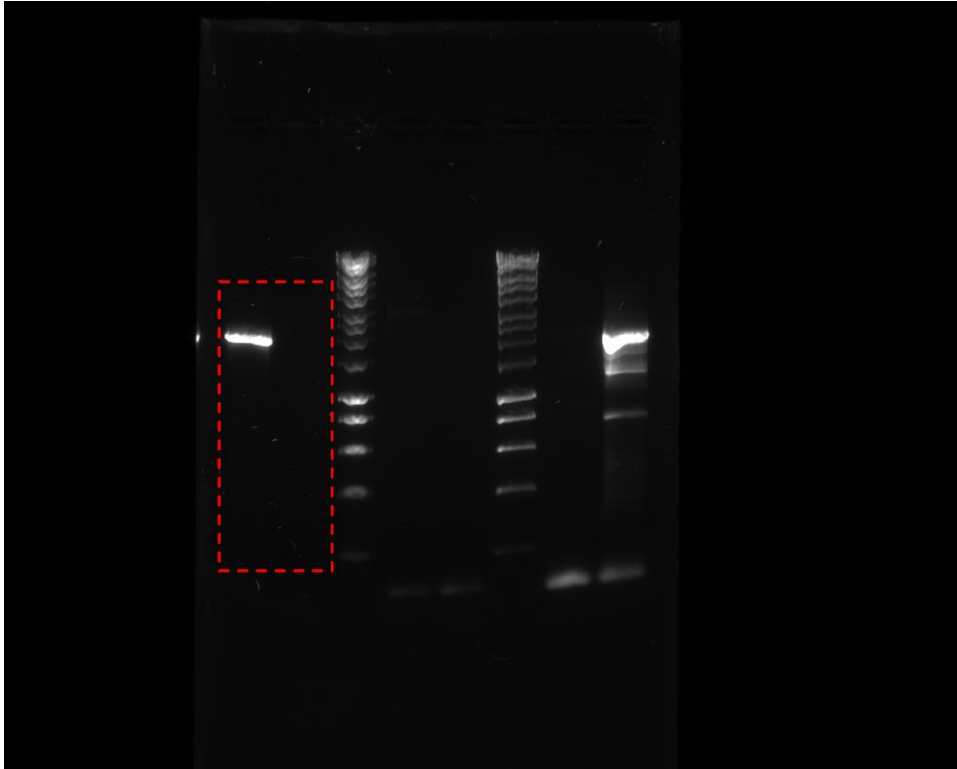

Supplement: fig5-figsupp1-data6 [file elife-107860-fig5-figsupp1-data6-v1.pdf]
