# Supplementary material for: Physiological febrile heat stress increases cytoadhesion through increased protein trafficking of Plasmodium falciparum surface proteins into the red blood cell
Source: eLife journal article supplement (doi:10.7554/elife.107860), 2025-08-28

## Figure 5 – Supplement 1 – Source Data 5

Uncropped protein gel (pre-transfer to nitrocellulose membrane) showing total protein content detected using the VersaBlot™ Total Protein Normalization Kit CF-680T, including VAR2CSA-TurboID-3xHA expressing parasite lysates alongside the wild-type parental strain (*Plasmodium falciparum* NF54 DiCre) lysate. The red boxed area indicates the region presented in the manuscript.

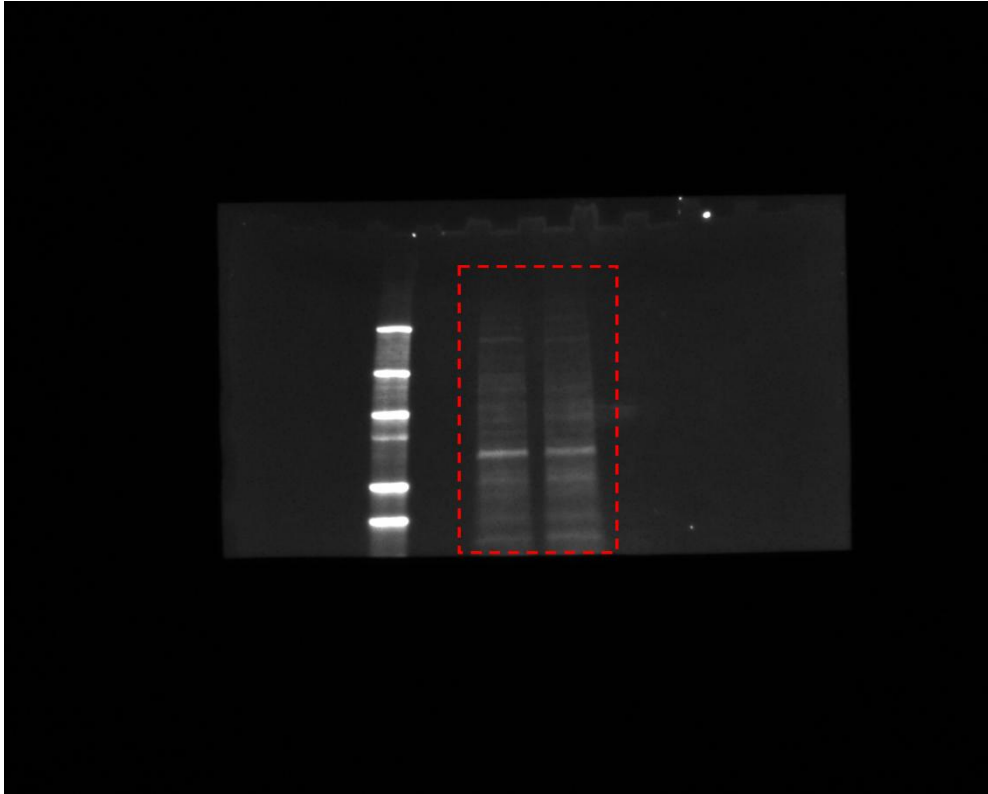

Supplement: fig5-figsupp1-data10 [file elife-107860-fig5-figsupp1-data10-v1.pdf]
