# Supplementary material for: Physiological febrile heat stress increases cytoadhesion through increased protein trafficking of Plasmodium falciparum surface proteins into the red blood cell
Source: eLife journal article supplement (doi:10.7554/elife.107860), 2025-08-28

## Figure 6 – Supplement 1 – Source Data 1

Uncropped agarose DNA gel showing PCR products used to assess the 5' integration of four constitutively expressed NanoLuciferase protein fusions: REX3-NanoLuc (REX3-NL), PF3D7\_0702500-NanoLuc (PF3D7\_0702500-NL), REX3(TMD)-NanoLuc (REX3(TMD)-NL) and NanoLuc alone (NL). The red boxed area indicates the region presented in the manuscript.

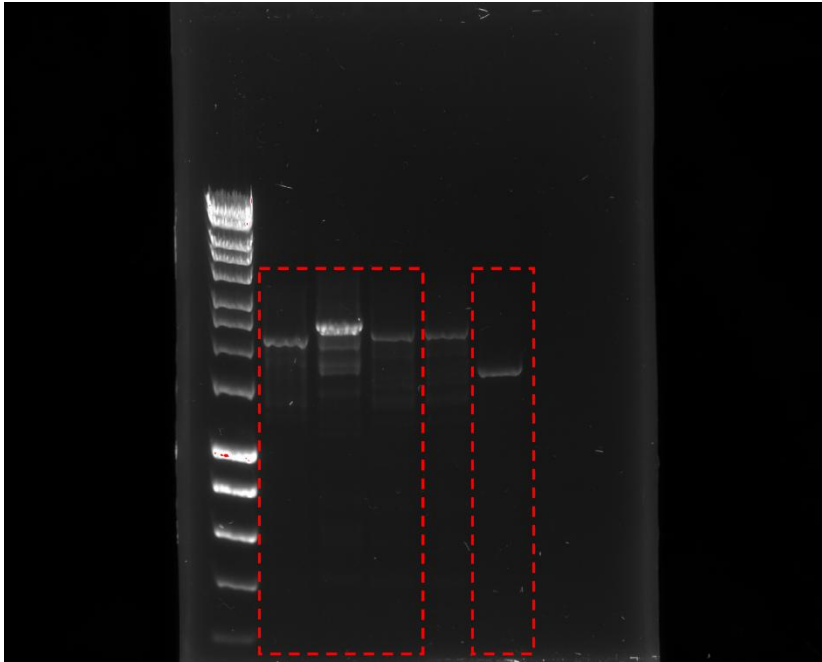

Supplement: fig6-figsupp1-data3 [file elife-107860-fig6-figsupp1-data3-v1.pdf]
