# Supplementary material for: Physiological febrile heat stress increases cytoadhesion through increased protein trafficking of Plasmodium falciparum surface proteins into the red blood cell
Source: eLife. 2026 May 13;14:RP107860. doi: 10.7554/eLife.107860 (PMC13171106; doi:10.7554/eLife.107860)
Supplement: Figure 1—figure supplement 1—source data 2. [file elife-107860-fig1-figsupp1-data2.xlsx]

## Sheet: S1C
No Heat Stress	Post Heat Stress
77.3773	85.3077
67.4099	77.1689
60.7234	61.8632
