# Supplementary material for: Physiological febrile heat stress increases cytoadhesion through increased protein trafficking of Plasmodium falciparum surface proteins into the red blood cell
Source: eLife. 2026 May 13;14:RP107860. doi: 10.7554/eLife.107860 (PMC13171106; doi:10.7554/eLife.107860)
Supplement: Figure 1—figure supplement 3—source data 1. [file elife-107860-fig1-figsupp3-data1.xlsx]

## Sheet: Sheet1
Time	Temperature
10	37.26
9.98333	37.25
9.96667	37.25
9.95	37.25
9.93333	37.24
9.91667	37.24
9.9	37.24
9.88333	37.23
9.86667	37.23
9.85	37.23
9.83333	37.23
9.81667	37.22
9.8	37.22
9.78333	37.22
9.76667	37.22
9.75	37.22
9.73333	37.21
9.71667	37.21
9.7	37.22
9.68333	37.21
9.66667	37.21
9.65	37.22
9.63333	37.22
9.61667	37.22
9.6	37.22
9.58333	37.23
9.56667	37.23
9.55	37.24
9.53333	37.25
9.51667	37.25
9.5	37.26
9.48333	37.28
9.46667	37.29
9.45	37.31
9.43333	37.32
9.41667	37.34
9.4	37.37
9.38333	37.4
9.36667	37.42
9.35	37.46
9.33333	37.49
9.31667	37.52
9.3	37.57
9.28333	37.62
9.26667	37.67
9.25	37.72
9.23333	37.77
9.21667	37.82
9.2	37.87
9.18333	37.93
9.16667	37.98
9.15	38.04
9.13333	38.1
9.11667	38.17
9.1	38.24
9.08333	38.33
9.06667	38.44
9.05	38.61
9.03333	38.78
9.01667	39.1
9	39.11
8.98333	39.11
8.96667	39.11
8.95	39.11
8.93333	39.1
8.91667	39.11
8.9	39.11
8.88333	39.11
8.86667	39.1
8.85	39.11
8.83333	39.11
8.81667	39.1
8.8	39.11
8.78333	39.11
8.76667	39.11
8.75	39.1
8.73333	39.11
8.71667	39.11
8.7	39.12
8.68333	39.12
8.66667	39.11
8.65	39.11
8.63333	39.11
8.61667	39.11
8.6	39.11
8.58333	39.11
8.56667	39.12
8.55	39.12
8.53333	39.11
8.51667	39.11
8.5	39.11
8.48333	39.11
8.46667	39.11
8.45	39.11
8.43333	39.11
8.41667	39.11
8.4	39.11
8.38333	39.11
8.36667	39.11
8.35	39.11
8.33333	39.11
8.31667	39.12
8.3	39.11
8.28333	39.13
8.26667	39.11
8.25	39.11
8.23333	39.11
8.21667	39.1
8.2	39.11
8.18333	39.11
8.16667	39.12
8.15	39.11
8.13333	39.11
8.11667	39.12
8.1	39.11
8.08333	39.11
8.06667	39.11
8.05	39.11
8.03333	39.11
8.01667	39.11
8	39.11
7.98333	39.11
7.96667	39.11
7.95	39.11
7.93333	39.11
7.91667	39.11
7.9	39.11
7.88333	39.12
7.86667	39.11
7.85	39.11
7.83333	39.11
7.81667	39.1
7.8	39.11
7.78333	39.11
7.76667	39.11
7.75	39.12
7.73333	39.11
7.71667	39.12
7.7	39.12
7.68333	39.11
7.66667	39.1
7.65	39.11
7.63333	39.11
7.61667	39.11
7.6	39.11
7.58333	39.11
7.56667	39.11
7.55	39.12
7.53333	39.11
7.51667	39.11
7.5	39.11
7.48333	39.12
7.46667	39.11
7.45	39.11
7.43333	39.11
7.41667	39.11
7.4	39.11
7.38333	39.11
7.36667	39.11
7.35	39.11
7.33333	39.11
7.31667	39.11
7.3	39.11
7.28333	39.1
7.26667	39.11
7.25	39.11
7.23333	39.12
7.21667	39.1
7.2	39.11
7.18333	39.1
7.16667	39.1
7.15	39.11
7.13333	39.1
7.11667	39.1
7.1	39.12
7.08333	39.11
7.06667	39.11
7.05	39.1
7.03333	39.1
7.01667	39.1
7	39.1
6.98333	39.1
6.96667	39.1
6.95	39.1
6.93333	39.1
6.91667	39.1
6.9	39.1
6.88333	39.1
6.86667	39.11
6.85	39.1
6.83333	39.1
6.81667	39.11
6.8	39.1
6.78333	39.1
6.76667	39.1
6.75	39.1
6.73333	39.11
6.71667	39.11
6.7	39.11
6.68333	39.1
6.66667	39.1
6.65	39.11
6.63333	39.1
6.61667	39.1
6.6	39.1
6.58333	39.1
6.56667	39.1
6.55	39.1
6.53333	39.09
6.51667	39.1
6.5	39.09
6.48333	39.09
6.46667	39.09
6.45	39.09
6.43333	39.09
6.41667	39.1
6.4	39.09
6.38333	39.09
6.36667	39.09
6.35	39.09
6.33333	39.09
6.31667	39.09
6.3	39.09
6.28333	39.09
6.26667	39.09
6.25	39.08
6.23333	39.09
6.21667	39.08
6.2	39.08
6.18333	39.09
6.16667	39.09
6.15	39.09
6.13333	39.09
6.11667	39.09
6.1	39.09
6.08333	39.09
6.06667	39.09
6.05	39.09
6.03333	39.09
6.01667	39.09
6	39.1
5.98333	39.09
5.96667	39.09
5.95	39.09
5.93333	39.09
5.91667	39.09
5.9	39.09
5.88333	39.09
5.86667	39.09
5.85	39.09
5.83333	39.09
5.81667	39.09
5.8	39.09
5.78333	39.09
5.76667	39.09
5.75	39.1
5.73333	39.09
5.71667	39.09
5.7	39.1
5.68333	39.1
5.66667	39.1
5.65	39.09
5.63333	39.1
5.61667	39.1
5.6	39.1
5.58333	39.1
5.56667	39.1
5.55	39.1
5.53333	39.1
5.51667	39.1
5.5	39.1
5.48333	39.1
5.46667	39.1
5.45	39.1
5.43333	39.1
5.41667	39.11
5.4	39.1
5.38333	39.1
5.36667	39.11
5.35	39.1
5.33333	39.1
5.31667	39.1
5.3	39.1
5.28333	39.1
5.26667	39.11
5.25	39.12
5.23333	39.1
5.21667	39.1
5.2	39.1
5.18333	39.11
5.16667	39.1
5.15	39.1
5.13333	39.1
5.11667	39.1
5.1	39.11
5.08333	39.1
5.06667	39.11
5.05	39.1
5.03333	39.11
5.01667	39.11
5	39.11
4.98333	39.11
4.96667	39.11
4.95	39.11
4.93333	39.11
4.91667	39.1
4.9	39.11
4.88333	39.11
4.86667	39.11
4.85	39.11
4.83333	39.11
4.81667	39.11
4.8	39.12
4.78333	39.11
4.76667	39.11
4.75	39.12
4.73333	39.11
4.71667	39.11
4.7	39.11
4.68333	39.11
4.66667	39.11
4.65	39.11
4.63333	39.11
4.61667	39.11
4.6	39.1
4.58333	39.11
4.56667	39.1
4.55	39.11
4.53333	39.11
4.51667	39.11
4.5	39.1
4.48333	39.11
4.46667	39.11
4.45	39.11
4.43333	39.11
4.41667	39.11
4.4	39.11
4.38333	39.12
4.36667	39.11
4.35	39.1
4.33333	39.1
4.31667	39.1
4.3	39.11
4.28333	39.11
4.26667	39.1
4.25	39.1
4.23333	39.1
4.21667	39.1
4.2	39.1
4.18333	39.1
4.16667	39.1
4.15	39.1
4.13333	39.1
4.11667	39.1
4.1	39.1
4.08333	39.1
4.06667	39.1
4.05	39.1
4.03333	39.1
4.01667	39.1
4	39.1
3.98333	39.1
3.96667	39.1
3.95	39.1
3.93333	39.09
3.91667	39.1
3.9	39.1
3.88333	39.11
3.86667	39.1
3.85	39.1
3.83333	39.1
3.81667	39.1
3.8	39.09
3.78333	39.09
3.76667	39.1
3.75	39.09
3.73333	39.09
3.71667	39.1
3.7	39.09
3.68333	39.1
3.66667	39.1
3.65	39.09
3.63333	39.09
3.61667	39.1
3.6	39.1
3.58333	39.1
3.56667	39.1
3.55	39.1
3.53333	39.1
3.51667	39.09
3.5	39.09
3.48333	39.1
3.46667	39.1
3.45	39.09
3.43333	39.1
3.41667	39.1
3.4	39.1
3.38333	39.1
3.36667	39.1
3.35	39.1
3.33333	39.1
3.31667	39.1
3.3	39.09
3.28333	39.09
3.26667	39.09
3.25	39.1
3.23333	39.1
3.21667	39.1
3.2	39.09
3.18333	39.09
3.16667	39.09
3.15	39.09
3.13333	39.09
3.11667	39.09
3.1	39.09
3.08333	39.09
3.06667	39.1
3.05	39.09
3.03333	39.09
3.01667	39.09
3	39.09
2.98333	39.09
2.96667	39.09
2.95	39.1
2.93333	39.09
2.91667	39.1
2.9	39.09
2.88333	39.09
2.86667	39.09
2.85	39.09
2.83333	39.09
2.81667	39.09
2.8	39.09
2.78333	39.09
2.76667	39.09
2.75	39.09
2.73333	39.09
2.71667	39.08
2.7	39.08
2.68333	39.09
2.66667	39.09
2.65	39.08
2.63333	39.08
2.61667	39.08
2.6	39.08
2.58333	39.08
2.56667	39.08
2.55	39.08
2.53333	39.07
2.51667	39.07
2.5	39.07
2.48333	39.07
2.46667	39.07
2.45	39.07
2.43333	39.06
2.41667	39.06
2.4	39.06
2.38333	39.06
2.36667	39.06
2.35	39.05
2.33333	39.05
2.31667	39.04
2.3	39.04
2.28333	39.04
2.26667	39.04
2.25	39.03
2.23333	39.03
2.21667	39.03
2.2	39.03
2.18333	39.02
2.16667	39.02
2.15	39.01
2.13333	39.01
2.11667	39.01
2.1	39
2.08333	39
2.06667	38.99
2.05	38.99
2.03333	38.99
2.01667	38.98
2	38.97
1.98333	38.97
1.96667	38.96
1.95	38.96
1.93333	38.94
1.91667	38.94
1.9	38.93
1.88333	38.92
1.86667	38.91
1.85	38.9
1.83333	38.89
1.81667	38.88
1.8	38.87
1.78333	38.86
1.76667	38.85
1.75	38.83
1.73333	38.82
1.71667	38.8
1.7	38.79
1.68333	38.78
1.66667	38.76
1.65	38.74
1.63333	38.73
1.61667	38.71
1.6	38.69
1.58333	38.67
1.56667	38.65
1.55	38.63
1.53333	38.61
1.51667	38.58
1.5	38.55
1.48333	38.53
1.46667	38.49
1.45	38.46
1.43333	38.42
1.41667	38.38
1.4	38.33
1.38333	38.29
1.36667	38.24
1.35	38.18
1.33333	38.13
1.31667	38.07
1.3	38
1.28333	37.92
1.26667	37.85
1.25	37.77
1.23333	37.69
1.21667	37.6
1.2	37.51
1.18333	37.42
1.16667	37.32
1.15	37.21
1.13333	37.1
1.11667	36.99
1.1	36.86
1.08333	36.74
1.06667	36.62
1.05	36.56
1.03333	36.54
1.01667	36.57
1	36.67
0.983333	36.79
0.966667	36.93
0.95	36.99
0.933333	37.04
0.916667	37.08
0.9	37.1
0.883333	37.1
0.866667	37.09
0.85	37.09
0.833333	37.1
0.816667	37.1
0.8	37.1
0.783333	37.1
0.766667	37.09
0.75	37.1
0.733333	37.09
0.716667	37.1
0.7	37.09
0.683333	37.1
0.666667	37.1
0.65	37.1
0.633333	37.1
0.616667	37.1
0.6	37.1
0.583333	37.09
0.566667	37.1
0.55	37.1
0.533333	37.1
0.516667	37.1
0.5	37.09
0.483333	37.1
0.466667	37.09
0.45	37.09
0.433333	37.09
0.416667	37.1
0.4	37.1
0.383333	37.09
0.366667	37.1
0.35	37.09
0.333333	37.09
0.316667	37.09
0.3	37.1
0.283333	37.09
0.266667	37.09
0.25	37.09
0.233333	37.1
0.216667	37.1
0.2	37.09
0.183333	37.1
0.166667	37.1
0.15	37.09
0.133333	37.1
0.116667	37.09
0.1	37.1
0.083333	37.09
0.066667	37.1
0.05	37.1
0.033333	37.09
0.016667	37.09
0	37.09
