# Supplementary material for: Physiological febrile heat stress increases cytoadhesion through increased protein trafficking of Plasmodium falciparum surface proteins into the red blood cell
Source: eLife. 2026 May 13;14:RP107860. doi: 10.7554/eLife.107860 (PMC13171106; doi:10.7554/eLife.107860)
Supplement: Figure 1—source data 1. [file elife-107860-fig1-data1.xlsx]

## Sheet: 1A
Abdi et al (Temperature (°C))	Mok et al (Temperature (°C))
38.5	36.8
39	36
37	36.9
40.5	37.3
39.5	35.6
39	35.3
39.3	37
40	38
38.7	35.6
38.2	36.5
39.5	34.8
40.8	36.2
40.5	38
37	35.6
39.9	38.6
39.3	37.4
38	38.1
39.7	37.3
38	34.8
36.5	36.9
37.5	34.3
39.3	38.1
36.7	37.7
40.2	35.4
39.9	36.8
40	35.8
39.4	34.7
36.5	35.1
38.9	35.1
39.1	34.1
40.4	37
38.1	34.2
39	38.3
37.1	37.7
37.7	36.2
36.1	37.3
38.4	36.9
39	35.5
37	36.9
39	36.6
39.8	36.3
38.2	35.4
38.7	35.1
38.1	35.8
40	34.7
39.7	36.9
37.5	36.2
37.5	35
38.4	37.8
39.5	39.9
39.6	36.7
39.5	38.9
38.2	34.2
35.9	37.1
38.8	37.7
39	36.2
37.2	36.7
39.5	36.1
37.5	36.3
39.6	36.8
37.9	38.1
38.7	37.4
39.8	36.7
39	36.5
39.6	37.7
37.3	36.6
38	38
36.4	40
39.4	36.7
38.9	37.7
37.4	36.1
38.3	37.7
39.8	37.3
37.5	37.5
38.4	38.1
38.4	36.7
40	38.6
38.9	37.1
38.9	37.1
41.3	37.3
37.2	36.2
37.2	37.6
38.8	37.2
38.6	36.8
38.6	36.7
39.7	36.2
39.6	38.6
37.7	37
38.1	37.7
37.9	36.8
39.2	36.2
37.4	36.4
37.5	39.1
38.2	36
38.6	36.2
38	36.5
36	37.1
38.4	38
38.4	38.3
38.9	37.3
37.9	37.6
37.9	37.5
40	36.8
35.3	38.1
38.4	36.7
39.1	37.4
35.9	37.8
35.6	36.6
38.5	36.1
39	36.3
38.9	36.7
38.9	36
37.4	36.2
37.3	38
38.9	36.5
39.4	36.3
38.3	37.5
40	39.3
37.3	37.4
39.1	37.6
37.6	37.4
37.1	38
35.7	36.7
38.1	37.4
39.2	36.5
38.5	36.3
37.6	37.6
39.1	36.3
39	36.3
40.2	36.9
37.2	36.5
38.3	36.1
40.3	37.6
36.2	36.9
39.7	36.5
37.7	36.4
41.3	36.1
36.6	36.3
37.7	38.1
38.4	36.9
38.5	36
37	36.5
36.5	36.9
39.8	37.9
37.5	36
37.5	36
37.2	36.5
36.8	36.8
39.3	37.3
39.8	38.7
37.9	36.2
37.2	36.2
38.7	37
38	37
40.3	36.4
39.8	37.9
38.3	36.3
38.5	36.1
39	37.7
40.3	37.7
38.9	36.6
36.3	37.3
38.9	37.8
38.5	36.5
39.6	36
39.4	38.2
38.4	38.2
37.5	39
37.8	37.9
38.3	39.5
34.4	38
38.9	39.3
37.6	40
39.5	39
39.2	38
38.2	40
38.5	39
37.9	39.5
39.6	39.8
39.1	39
36	39.5
40.3	37.8
37	40
38.1	38.5
38.5	38.5
39.3	38
38.6	39
39.5	40
38.1	41
40.5	38.5
40.2	38.5
40	38.7
36	40
39	38.3
37.6	38
38.5	38
37.9	38
38	40
36.3	39
36.7	40.5
38.9	39.5
36.9	39
39	39
38.9	39
37.4	38
39	38
37.3	38.5
37.4	38
36	38
38.3	38
37.9	38.5
35.5	39
38.9	38.5
37.1	39
39.7	40
37.5	40
38	38.5
38.8	39
38.6	38
39.7	39
38.1	39
37.3	39.5
39	38.5
38.7	40
35.2	38
38.7	38.5
40.1	38.5
38	38.5
39.1	37.5
39.5	39
38.9	39
39.4	39
38.1	38
37.8	40
38.5	39
37.8	38
38.1	38.5
37.8	39
36.8	39
37.7	38.5
38.9	39
39.6	39
38.6	38.8
37.7	39
39.3	38.5
37.7	38.5
40.5	39
39.1	38
37	39
38	38
37.5	39
37.6	40
38	40
37.7	38
39.5	38
38.5	38
37.1	38.8
38.1	38.5
37.3	38.5
37.1	38.8
36.9	38.5
37.7	38.5
37.1	39.5
37.1	38.5
36.2	38
36.2	38
36.6	39
37.1	39.5
37.3	39
36.6	39
36.5	36.5
36.2	38.3
36.8	37.3
36.8	39.2
36.5	39.4
36.6	38.2
36.6	36.4
37.1	38.9
35.5	39
36.5	37.8
37.3	36.7
37.1	37.5
37	38.3
36.6	36.5
36.2	38.8
36.8	38.9
36.8	38.7
36.9	39.5
37.1	37.3
37.5	38.9
39.3	38.1
39.2	38.1
39	37.6
37.3	37.7
37.4	37.1
39.4	37.3
37.8	36.8
37.5	36.7
38	38.5
34.3	37.6
40.4	37.3
37.6	37.3
38.8	36.5
39.2	36.4
39	37.9
40.1	37.8
38.3	38.2
38.5	36.1
35.9	36.7
37.7	36.5
38.1	36.4
38	37.8
38.6	37.2
36	37.5
38.4	39.1
38.9	39.1
37.3	37.8
38.5	38.8
40.4	39
37.8	36.6
37.5	36.1
39.2	36.4
36.9	36.9
38.2	36.7
37.4	37
39.1	37.8
37.8	36.7
39.4	36.3
37.3	38.2
39.4	38.4
37.3	37.6
37.9	36.7
37.4	36.9
36.5	39.1
39.8	37.5
39.8	36.7
39.3	36.6
38.6	36
39	37.9
38	39.2
37.5	37.9
39.3	35.4
40	36.7
37.6	39
36.6	38.5
39.3	36.2
38.2	38.2
38.7	37
37.6	40
39.9	38.8
37.9	38.2
39.5	38.5
39.4	39.8
37.8	37.9
37.9	39.9
40.5	39.2
37.6	38
39.7	36.2
37.5	36.6
40.1	38.8
40.1	38.2
37.9	37.1
38.9	37.2
37.7	36.7
38.5	39
39.2	36.8
39.2	38.6
39.9	36.9
38.3	37.6
38.9	38.6
38.2	36.5
39.6	38.9
38.8	37.3
35.9	36.2
37.3	37.2
37.1	37.1
40.1	37.2
39	38.4
37.8	37.5
38.9	37.5
37.4	37.5
38.2	38.4
37.7	36.3
37	36.5
37.5	37.2
40.3	38.1
38	36.5
37.6	36.9
40.2	36.5
39.6	37.1
39.3	39.5
38.6	37.1
38.3	35.4
38.9	36.4
39.7	37.3
37.5	36
39	39.5
37.8	37.3
37.9	38.5
36.5	37.2
38.9	39.1
40.1	38.7
37.8	37.3
38.6	36.4
37	36.8
38.7	37.5
36.6	37.7
36.3	38.5
37.4	35.6
37.2	38.2
39.6	38
40.3	37.5
37.2	38
39.1	38.1
38	37.8
38.5	37.1
35.1	37.8
39.4	37.9
37.7	37
38.5	36.6
40.3	37.6
36.7	37.5
38.3	39.5
38.8	37
39.2	37.5
38.2	36.8
38.8	37.5
38.7	37
38.7	39.5
38.3	39.2
39.2	37.4
39.5	38.2
37.2	36.2
38.4	40
38	36
37.5	37
39	39
37.9	37.5
39.2	38
37.4	37.5
38.2	38.5
38.6	39
37.7	37
39.4	36.8
37.8	37
37.3	37
40	40
37	38
39.9	38.5
38.7	37.9
39.2	39.5
37.5	37.5
39.4	38
36.6	38.7
39.8	37.7
39.3	38.5
35.8	39
36.6	37
36.5	39.8
36.6	39.5
36.3	38
36.7	38
36.8	36.6
36.9	40
35.7	38
36.3	38
36.2	37.5
36.1	37
38	38.3
39	37.6
36.9	39
36.1	39
38.4	39
37.9	39.5
36.1	38.3
39.6	38.1
40	38.6
36.9	37.2
36.7	37
36.3	37
38.3	38
39	40
39.8	39
37.6	40
38.1	41
36.7	40
35.6	38
39.3	36.7
39.3	38
38.5	38
37.3	40
38	38.3
38.8	38.2
39.9	37.9
39.5	40.3
36.7	39.9
39	37.1
38.6	38.4
37.8	38
37.8	39.3
37.6	39.9
37.9	37.4
36.4	37.6
36.2	38.1
38.4	37.5
38.2	39.2
36.7	38.5
39.2	37.4
37.3	39.2
38.6	37.1
36.7	39.5
35.4	38.8
37.2	38.3
38	38.1
39	39.1
36.6	39.1
38.7	39.3
39.1	39.9
40.6	37.7
38.8	39.8
39.6	38.7
39	39.9
39.8	38.8
39.6	37.3
39.3	39.5
37.4	37.2
36.8	37.3
39.1	40.2
36.3	38.7
39.9	39.6
39.5	38.6
39.3	39.4
37.1	37.3
39.4	39.3
37	39
36.8	38.7
38.2	39.6
36.5	37.5
38.6	37.3
36.2	39
37.7	39.8
39.2	38.8
36.1	39.1
37.5	40.5
39.2	37.4
39.1	39.1
39.3	38.1
38	39.1
38.3	38.2
36	38.8
38.4	37.6
37.4	38.7
38	38.4
37.7	39.2
39.9	39.2
40.1	38.3
38	38
37.2	40.8
38.9	38.3
40.1	37.9
39.1	39.7
38.3	39.7
39.2	38.3
39.1	38.3
39.9	38.3
38.9	36.5
40.1	36.5
37.8	38.7
38.6	38.2
38.4	37.5
40	38.5
37.8	37.9
36.4	38.8
39.3	39.6
37.2	37.4
35.8	39.7
39.5	37.7
39.6	37
39.9	39.3
37.7	38.5
37.7	38
37.1	38
39.1	38.6
37.3	37.3
39.1	38
37	37.9
39.4	37.7
39.2	36.9
39.4	39.2
38.6	38.1
37.6	37.4
40.7	37
39.6	38.5
39.1	39.8
39.2	37.9
39.5	37.7
36.5	36.9
36.8	39.5
39.9	38.1
39.7	38.8
37.2	37.7
39.6	37
38.8	39.6
38.4	40.2
37.9	40.1
40.6	36.6
38.7	37.2
38.6	38
35.8	36.5
39.4	38.2
38.4	36.9
39.2	39.5
40	39.2
39.2	38.2
38.3	38.9
38.8	38.6
36.8	38.5
39	36.6
37.3	39.2
36.5	37.5
37.5	36.9
38.7	37.8
38.8	39.4
38.8	36.9
39.3	37.2
36.7	37.7
37.4	39.6
37.2	39.2
40.8	36.4
39	36.4
39.1	39.6
36.3	38.8
36.5	39.1
39.3	39.3
37	38.8
37.3	38.6
39.4	40.7
	39.3
	39.3
	37.5
	36.9
	37.8
	38.5
	39.1
	38.3
	39.9
	39.2
	37.8
	38.1
	38
	36.1
	36.1
	39.6
	38.9
	37.5
	39.7
	40.2
	37.6
	36.4
	38.3
	36.9
	39.9
	38.6
	39.2
	36.6
	38.7
	39.9
	39.2
	39.7
	39.5
	39.1
	40.5
	37.9
	39.6
	39.6
	39.6
	38.6
	38.6
	37.8
	38
	39.5
	38.9
	40
	39.7
	37.9
	39.2
	39.4
	39.8
	37.6
	37.6
	38.7
	37.8
	38.6
	37.8
	37.8
	39.3
	37.9
	37.8
	38.2
	38.1
	37.9
	37.9
	38.2
	39
	37.8
	37.8
	37.9
	38.3
	37.8
	37.9
	38
	38.1
	37.9
	38.5
	38.6
	38
	38.8
	38.2
	37.9
	38.1
	38.7
	38.6
	38.2
	37.8
	38.3
	37.9
	37.9
	38.7
	37.8
	37.8
	37.8
	39
	38.1
	38.8
	38.2
	38.3
	37.9
	39
	37.9
	37.8
	38
	38
	37.8
	39.6
	38.8
	39.2
	37.9
	38.4
	37.8
	38.4
	38.3
	38.2
	37.2
	37.8
	37.8
	37.5
	36.6
	38.4
	37
	36.8
	37.5
	40.2
	39.2
	39.2
	38
	38
	39.4
	37.3
	36.9
	39.6
	38.2
	39.9
	38.5
	39.5
	37
	38.7
	37.1
	37.8
	36.9
	37.9
	37.9
	39
	39
	39.5
	37.1
	37
	36.5
	36.9
	37.2
	37.4
	36.9
	37.5
	37.5
	37.7
	36.9
	37.7
	37.7
	38.5
	38.6
	37.3
	38
	40
	39.3
	37.2
	37.8
	38.5
	39.4
	38.5
	38.7
	37.7
	37.9
	37.4
	36
	38.2
	37.2
	38
	38.9
	38.3
	36.9
	39
	37.9
	37.5
	37
	37.8
	36.8
	38.1
	36.9
	37.6
	37.7
	37.5
	37.5
	36.3
	36.7
	36.5
	37.5
	38.6
	36.4
	36.6
	36.6
	36.9
	36.9
	38.8
	38.8
	37.5
	37.5
	37.2
	36
	38.3
	38.8
	38.5
	36.2
	38.7
	36.2
	37.3
	38
	38.3
	36.7
	37.1
	36.8
	37.6
	37.3
	36.7
	37.3
	37.1
	38.1
	37.5
	38.5
	36.6
	39.2
	37.3
	37.6
	40.3
	38.5
	37.4
	37
	37.5
	38
	37.1
	37.5
	38.6
	37.5
	38.9
	36.8
	38
	37.7
	38.1
	37.7
	38.7
	38.5
	37.5
	36.2
	37.2
	38.7
	37.7
	40
	38.2
	40
	38
	38.5
	38.3
	39
	39.4
	36.5
	37.3
	38.5
	36.5
	37.4
	38
	39.9
	39.2
	38.5
	37.9
	37
	37.5
	38.5
	38.3
	38
	37.2
	37.5
	37.8
	39.2
	39.4
	38.9
	40.5
	37.6
	40
	40
	37
	37.5
	40.5
	39.8
	39.4
	38
	37
	37.2
	39.5
	38.4
	37
	40.1
	37
	38.5
	37.9
	37
	37.8
	37.7
	38.2
	39.7
	37.4
	38.9
	39.4
	39.8
	38.6
	38
	36.5
	35.5
	40.2
	38.7
	37.3
	38.3
	36.6
	36.8
	37.9
	37.4
	38.6
	35.9
	37.8
	38.6
	38.5
	38.1
	37.8
	37.3
	39.1
	37.8
	38.8
	38.7
	39.5
	37.9
	37.9
	38.1
	37.3
	37.5
	36.6
	37.3
	39
	37.7
	37.6
	37.4
	36.3
	39.3
	38.8
	37.8
	37
	38
	35.4
	35.7
	35.9
	34.8
	36.3
	38.9
	37.8
	37.5
	40.2
	37.1
	38.4
	36.9
	37
	37.2
	38.2
	40.7
	37.1
	40.4
	36.9
	38
	38.3
	38
	37.2
	38
	38.7
	37.8
	38.7
	39.1
	37
	36.6
	40.1
	36.8
	36.7
	38.3
	38.7
	37.1
	38.9
	38.5
	39.1
	41
	40.1
	39.9
	39.6
	38.1
	39.1
	37
	38.5
	37.5
	38.4
	38
