# Supplementary material for: Physiological febrile heat stress increases cytoadhesion through increased protein trafficking of Plasmodium falciparum surface proteins into the red blood cell
Source: eLife. 2026 May 13;14:RP107860. doi: 10.7554/eLife.107860 (PMC13171106; doi:10.7554/eLife.107860)
Supplement: Figure 1—source data 2. [file elife-107860-fig1-data2.xlsx]

## Sheet: 1B
Abdi et al (Temperature (°C))	Mok et al (Temperature (°C))
38.5	38.1
39	38.1
40.5	38.1
39.5	38.1
39	38.1
39.3	38.1
40	38.1
38.7	38.1
38.2	38.1
39.5	38.1
40.8	38.1
40.5	38.1
39.9	38.1
39.3	38.1
39.7	38.1
39.3	38.1
40.2	38.1
39.9	38.1
40	38.1
39.4	38.1
38.9	38.1
39.1	38.1
40.4	38.1
38.1	38.1
39	38.1
38.4	38.1
39	38.1
39	38.2
39.8	38.2
38.2	38.2
38.7	38.2
38.1	38.2
40	38.2
39.7	38.2
38.4	38.2
39.5	38.2
39.6	38.2
39.5	38.2
38.2	38.2
38.8	38.2
39	38.2
39.5	38.2
39.6	38.2
38.7	38.2
39.8	38.2
39	38.2
39.6	38.2
39.4	38.2
38.9	38.2
38.3	38.2
39.8	38.2
38.4	38.2
38.4	38.2
40	38.3
38.9	38.3
38.9	38.3
41.3	38.3
38.8	38.3
38.6	38.3
38.6	38.3
39.7	38.3
39.6	38.3
38.1	38.3
39.2	38.3
38.2	38.3
38.6	38.3
38.4	38.3
38.4	38.3
38.9	38.3
40	38.3
38.4	38.3
39.1	38.3
38.5	38.3
39	38.3
38.9	38.3
38.9	38.3
38.9	38.3
39.4	38.3
38.3	38.3
40	38.3
39.1	38.3
38.1	38.4
39.2	38.4
38.5	38.4
39.1	38.4
39	38.4
40.2	38.4
38.3	38.4
40.3	38.4
39.7	38.4
41.3	38.4
38.4	38.4
38.5	38.5
39.8	38.5
39.3	38.5
39.8	38.5
38.7	38.5
40.3	38.5
39.8	38.5
38.3	38.5
38.5	38.5
39	38.5
40.3	38.5
38.9	38.5
38.9	38.5
38.5	38.5
39.6	38.5
39.4	38.5
38.4	38.5
38.3	38.5
38.9	38.5
39.5	38.5
39.2	38.5
38.2	38.5
38.5	38.5
39.6	38.5
39.1	38.5
40.3	38.5
38.1	38.5
38.5	38.5
39.3	38.5
38.6	38.5
39.5	38.5
38.1	38.5
40.5	38.5
40.2	38.5
40	38.5
39	38.5
38.5	38.5
38.9	38.5
39	38.5
38.9	38.5
39	38.5
38.3	38.5
38.9	38.5
39.7	38.5
38.8	38.5
38.6	38.5
39.7	38.5
38.1	38.5
39	38.5
38.7	38.5
38.7	38.5
40.1	38.5
39.1	38.6
39.5	38.6
38.9	38.6
39.4	38.6
38.1	38.6
38.5	38.6
38.1	38.6
38.9	38.6
39.6	38.6
38.6	38.6
39.3	38.6
40.5	38.6
39.1	38.6
39.5	38.6
38.5	38.6
38.1	38.6
39.3	38.6
39.2	38.6
39	38.6
39.4	38.6
40.4	38.6
38.8	38.6
39.2	38.7
39	38.7
40.1	38.7
38.3	38.7
38.5	38.7
38.1	38.7
38.6	38.7
38.4	38.7
38.9	38.7
38.5	38.7
40.4	38.7
39.2	38.7
38.2	38.7
39.1	38.7
39.4	38.7
39.4	38.7
39.8	38.7
39.8	38.7
39.3	38.7
38.6	38.7
39	38.7
39.3	38.7
40	38.7
39.3	38.7
38.2	38.8
38.7	38.8
39.9	38.8
39.5	38.8
39.4	38.8
40.5	38.8
39.7	38.8
40.1	38.8
40.1	38.8
38.9	38.8
38.5	38.8
39.2	38.8
39.2	38.8
39.9	38.8
38.3	38.8
38.9	38.8
38.2	38.8
39.6	38.8
38.8	38.8
40.1	38.8
39	38.8
38.9	38.8
38.2	38.8
40.3	38.9
40.2	38.9
39.6	38.9
39.3	38.9
38.6	38.9
38.3	38.9
38.9	38.9
39.7	38.9
39	38.9
38.9	38.9
40.1	38.9
38.6	38.9
38.7	38.9
39.6	38.9
40.3	39
39.1	39
38.5	39
39.4	39
38.5	39
40.3	39
38.3	39
38.8	39
39.2	39
38.2	39
38.8	39
38.7	39
38.7	39
38.3	39
39.2	39
39.5	39
38.4	39
39	39
39.2	39
38.2	39
38.6	39
39.4	39
40	39
39.9	39
38.7	39
39.2	39
39.4	39
39.8	39
39.3	39
39	39
38.4	39
39.6	39
40	39
38.3	39
39	39
39.8	39
38.1	39
39.3	39
39.3	39
38.5	39
38.8	39
39.9	39
39.5	39
39	39
38.6	39
38.4	39
38.2	39
39.2	39
38.6	39
39	39
38.7	39.1
39.1	39.1
40.6	39.1
38.8	39.1
39.6	39.1
39	39.1
39.8	39.1
39.6	39.1
39.3	39.1
39.1	39.1
39.9	39.1
39.5	39.1
39.3	39.1
39.4	39.1
38.2	39.1
38.6	39.1
39.2	39.1
39.2	39.2
39.1	39.2
39.3	39.2
38.3	39.2
38.4	39.2
39.9	39.2
40.1	39.2
38.9	39.2
40.1	39.2
39.1	39.2
38.3	39.2
39.2	39.2
39.1	39.2
39.9	39.2
38.9	39.2
40.1	39.2
38.6	39.2
38.4	39.2
40	39.2
39.3	39.2
39.5	39.2
39.6	39.2
39.9	39.3
39.1	39.3
39.1	39.3
39.4	39.3
39.2	39.3
39.4	39.3
38.6	39.3
40.7	39.3
39.6	39.3
39.1	39.3
39.2	39.3
39.5	39.3
39.9	39.4
39.7	39.4
39.6	39.4
38.8	39.4
38.4	39.4
40.6	39.4
38.7	39.4
38.6	39.4
39.4	39.4
38.4	39.4
39.2	39.5
40	39.5
39.2	39.5
38.3	39.5
38.8	39.5
39	39.5
38.7	39.5
38.8	39.5
38.8	39.5
39.3	39.5
40.8	39.5
39	39.5
39.1	39.5
39.3	39.5
39.4	39.5
38.8	39.5
38.4	39.5
40.6	39.5
38.7	39.5
38.6	39.5
39.4	39.5
38.4	39.5
39.2	39.5
40	39.5
39.2	39.5
38.3	39.6
38.8	39.6
39	39.6
38.7	39.6
38.8	39.6
38.8	39.6
39.3	39.6
40.8	39.6
39	39.6
39.1	39.6
39.3	39.6
39.4	39.6
	39.6
	39.7
	39.7
	39.7
	39.7
	39.7
	39.7
	39.7
	39.8
	39.8
	39.8
	39.8
	39.8
	39.8
	39.8
	39.8
	39.8
	39.9
	39.9
	39.9
	39.9
	39.9
	39.9
	39.9
	39.9
	39.9
	39.9
	39.9
	39.9
	40
	40
	40
	40
	40
	40
	40
	40
	40
	40
	40
	40
	40
	40
	40
	40
	40
	40
	40
	40
	40
	40
	40
	40
	40
	40
	40
	40.1
	40.1
	40.1
	40.1
	40.2
	40.2
	40.2
	40.2
	40.2
	40.2
	40.3
	40.3
	40.4
	40.5
	40.5
	40.5
	40.5
	40.5
	40.7
	40.7
	40.8
	41
	41
	41
	39.9
	39.2
	38.5
	38.5
	38.3
	38
	39.2
	39.4
	38.9
	40.5
	40
	40
	40.5
	39.8
	39.4
	38
	39.5
	38.4
	40.1
	38.5
	38.2
	39.7
	38.9
	39.4
	39.8
	38.6
	38
	40.2
	38.7
	38.3
	38.6
	38.6
	38.5
	38.1
	39.1
	38.8
	38.7
	39.5
	38.1
	39
	39.3
	38.8
	38
	38.9
	40.2
	38.4
	38.2
	40.7
	40.4
	38
	38.3
	38
	38
	38.7
	38.7
	39.1
	40.1
	38.3
	38.7
	38.9
	38.5
	39.1
	41
	40.1
	39.9
	39.6
	38.1
	39.1
	38.5
	38.4
	38
