# Supplementary material for: Physiological febrile heat stress increases cytoadhesion through increased protein trafficking of Plasmodium falciparum surface proteins into the red blood cell
Source: eLife. 2026 May 13;14:RP107860. doi: 10.7554/eLife.107860 (PMC13171106; doi:10.7554/eLife.107860)
Supplement: Figure 1—source data 3. [file elife-107860-fig1-data3.xlsx]

## Sheet: 1C
4 hpi	6 hpi	8 pi	10 hpi	12 hpi	14 hpi	16 hpi	18 hpi
37.5	37.2	37.3	36.2	34.8	37.3	36.9	36
36.7	40	38	38.1	36.7	35.4	35.6	35.3
37.5	37.8	38.6	34.3	36.7	34.7	37	35.6
37.9	37.2	37.4	37.1	36.6	37.3	38	37.7
38.5	38	34.8	36.3	37.7	35.5	35.6	36.8
38.5		36.9	37.4	36.7	36.9	36.5	34.1
39		38.1	36.7	36.6	36.8	35.1	34.2
39.5		35.8	37.1	36.3	36.7	36.7	36.3
39		35.1	36.4	36	36.2	34.2	34.7
38.5		37	36.2	37.7	37.1	38.1	37.3
37.8		37.7	37.3	40	36.1	38.6	38.7
39.2		36.2	37.6	38	39.3	36.2	37.5
38.9		36.9	36.5	38	36.3	37.6	36.9
35.6		36.6	36.5	38	36.5	37.2	36.1
39.8		35.4	36.3	38.5	36.9	39.1	38.8
38		35.8	36.3	38.5	36.4	38.1	37.2
39		36.9	36.5	39	36.1	36	36.8
41		36.2	38	38.2	36.6	38	36.5
38		35	39	36.1	37.8	37.4
39.5		37.8	40	37.6	37.5	36.9
39.1		39.9	40	36.6	39	36.5
37.9		38.9	39	35.4	38.5	36.9
38.2		37.7	38	36.5	38.5	38.1
39.2		36.2	38	35.4	38	37.9
39.4		36.1	38	36.8	38	37.7
39.6		38.1	38.5	37.4	39	37.3
36.4		36.5	39	38.2	36.5	37.8
38.8		37.7	38	37.9	37.3	39
39.1		38	38	37.5	38.2	38
38.8		40	40	37	36.7	38.5
38.6		36.1	38.8	37.3	36.9	37.6
39.3		37.7	38	38.7	36.2	36.4
39.3		37.3	37.3	38.7	37.1	36.4
39.6		37.5	37.3	39.8	36.8	39.1
38.6		37.1	37.8	38.5	36.5	37.3
36.6		37.3	36.3	37	37	37.1
39.9		36.8	36.7	38.8	38	37.3
39.7		38.6	38.2	36.5	38.3	36
39.5		37	38.6	36.9	37.5	36.4
39		37.7	37.5	39.2	37.2	37.8
38.3		36.8	38.5	39.1	37.3	37.6
38.2		36.2	37.2	37.8	37.4	36.2
38.1		36	36.7	37.5	37.6	36
39.6		36.5	38.2	39.6	38.4	37
37.9		38	37.4	37.9	38.7	39.5
37.8		38.3	39.2	37.9	37.5	38.7
38.5		36.8	39.1	37	38	37
38.7		36.7	39.6	36.5	38.1	38
37.9		37.4	39.4	37.2	36.6	39
39.7		37.8	39.3	37.5	36.4	37
38.6		36.2	39.1	37.7	36.4	38
39.1		36.3	38.1	38	39.5	37.4
37.9		37.6	38	37.2	37.8	38.8
36.3		37.4	36.5	36.3	37.8	39.2
40.7		38	38.2	36.4	38.1	37.9
38.7		36.7	38	37.1	38.6	37.7
		37.4	39.5	37.4	38	36.9
		36.3	37.2	37	38.1	36.9
		37.6	39.6	37.1	37	36.9
		36.1	39.8	36.2	37.3	36.9
		37.6	37.8	37	36.9	39.2
		36.4	37.8	38.6	37.4	38.2
		36.1	37.9	36.8	36.9	38.2
		36.3	37.9	37.8	37.7	38
		36.9	38.7	37.5	38.5	37.9
		36	37.8	39	39.4	38.7
		36.5	37.8	38.2	38.5	39
		36	38.2	37.1	38.3	37.8
		36.5	38		37.3	38.4
		36.8	37.8		36.8	38.3
		36.2	37.5		36.6	38.2
		36.2	36.6		40	39.2
		37	37.3		37.5	36.9
		37	37.4		37	36.9
		36	36		37.2	39.5
		38.2	37.7		37.7	39.3
		38.2	37.5		38.3	37.5
		39	38.6		36.6	37
		37.9	37.5		37	36.8
		39.5	38.9			36.9
		39.3	37.7			36.7
		39	37.7			37.5
		40	39.4			36.9
		39.5	38.5			36.9
		39.8	37.8			36
		39	38.9			37.6
		39.5	40			37.6
		40	37			39.4
		38.5	38			37.2
		38.5	36.6
		38	37.3
		39	35.7
		40	35.9
		41	36.9
		38.5	37
		38.5	39.1
		38.7
		38.3
		38
		38
		40.5
		39.5
		39
		39
		38.5
		38
		39
		40
		40
		39
		39
		39
		39.5
		40
		38
		38.5
		38.5
		39
		38
		40
		39
		38.5
		39
		39
		39
		38.8
		39
		38.5
		39
		39
		39
		40
		38
		38
		38.8
		38.5
		38.5
		38.5
		39.5
		38.5
		38
		39
		38.3
		37.3
		39.2
		39.4
		36.4
		38.9
		39
		37.8
		36.7
		37.5
		38.3
		36.5
		38.8
		38.9
		38.7
		39.5
		38.9
		38.1
		38.1
		37.7
		37.1
		36.8
		36.7
		37.6
		37.3
		36.5
		37.9
		36.7
		36.5
		37.8
		37.2
		37.5
		39.1
		39.1
		37.8
		38.8
		39
		36.6
		36.1
		36.4
		36.9
		37
		36.7
		38.2
		38.4
		36.7
		37.5
		36.7
		36
		37.9
		37.9
		39
		38.5
		38.2
		37
		40
		38.8
		38.5
		39.8
		37.9
		39.9
		39.2
		38
		36.2
		36.6
		38.8
		38.2
		36.7
		39
		36.9
		37.6
		38.6
		36.2
		37.2
		37.2
		38.4
		37.5
		37.5
		37.5
		38.4
		36.3
		37.2
		38.1
		36.5
		36.9
		36.5
		37.1
		39.5
		37.1
		36.4
		39.5
		37.3
		38.5
		37.2
		39.1
		38.7
		37.3
		36.8
		37.5
		37.7
		38.5
		38.2
		38
		37.5
		38
		38.1
		37.1
		37.8
		37.9
		37
		36.6
		39.5
		37
		37.5
		37.5
		37
		39.5
		39.2
		40
		37
		39
		37.5
		38
		39
		37
		36.8
		40
		38
		38.5
		37.5
		38
		37.7
		38.5
		39
		39.5
		36.6
		40
		38
		37.6
		39
		38.3
		38.1
		38.6
		37
		38
		40
		39
		40
		40
		38
		38.3
		37.9
		40.3
		39.9
		37.1
		38.4
		38
		39.3
		39.9
		37.6
		38.1
		38.5
		39.2
		37.1
		39.5
		38.8
		38.3
		38.1
		39.1
		39.3
		39.9
		37.7
		39.8
		38.7
		39.9
		38.8
		37.3
		40.2
		38.6
		37.3
		39
		39.6
		37.5
		39
		38.8
		39.1
		40.5
		38.2
		38.8
		38.7
		39.2
		38.3
		40.8
		38.3
		39.7
		39.7
		38.3
		38.3
		38.3
		36.5
		37.9
		39.6
		37.4
		39.7
		37.7
		37
		39.3
		38.5
		38
		38.6
		37.3
		37.9
		37.7
		37.4
		38.5
		39.8
		38.1
		37.7
		37
		39.6
		40.2
		40.1
		36.6
		38
		36.9
		39.5
		39.2
		38.2
		38.9
		38.6
		38.5
		37.5
		37.8
		37.2
		37.7
		39.6
		39.3
		40.7
		37.5
		37.8
		38.5
		38.3
		39.9
		39.2
		38.1
		38
		36.1
		38.9
		37.5
		39.7
		40.2
		37.6
		39.9
		38.7
		39.2
		39.1
		40.5
		37.9
		39.6
		39.6
		38.6
		38.6
		37.8
		38
		38.9
		40
		39.7
		37.9
		39.2
		39.4
		37.6
		37.6
		38.7
		38.6
		37.8
		39.3
		38.1
		37.9
		37.8
		37.9
		37.8
		37.9
		38.5
		38.8
		37.9
		38.6
		38.2
		37.8
		38.3
		37.9
		38.8
		38.3
		37.9
		39
		37.9
		38
		39.2
		38.4
		37.8
		37.8
		38.4
		40.2
		39.2
		38
		38
		39.4
		38.2
		39.9
		38.5
		39.5
		37
		38.7
		37.1
		37.8
		39
		39
		37.1
		37.5
		37.7
		36.9
		38.6
		40
		37.2
		37.8
		38.5
		38.7
		37.7
		37.9
		38.2
		38
		38.9
		36.9
		39
		37.9
		37.8
		38.1
		37.6
		37.5
		36.6
		36.6
		38.8
		38.8
		37.5
		37.2
		38.3
		38.8
		38.5
		36.2
		38.7
		36.2
		38
		38.3
		37.3
		36.7
		37.3
		37.1
		38.1
		37.5
		39.2
		37.3
		37.6
		40.3
		38.5
		37.5
		38
		37.5
		38.6
		37.5
		38
		38.1
		38.7
		38.5
		37.5
		37.7
		38.2
		40
		38.5
		39
		36.5
		37.3
		36.5
		37.4
		38
		39.2
		38.5
		37.9
		37.5
		38.5
		38.3
		38
		37.2
		37.5
		39.2
		39.4
		40.5
		40
		40.5
		39.8
		39.5
		38.4
		37
		40.1
		37
		38.5
		37
		37.8
		38.2
		37.4
		38.9
		39.4
		39.8
		38
		36.5
		35.5
		40.2
		38.7
		37.3
		38.3
		36.6
		37.9
		37.4
		35.9
		37.8
		38.6
		38.5
		38.1
		37.8
		37.3
		38.8
		38.7
		39.5
		37.9
		38.1
		37.3
		37.7
		37.6
		37.4
		36.3
		39.3
		38.8
		37.8
		37
		38
		35.4
		34.8
		38.9
		37.8
		37.5
		40.2
		37.1
		38.4
		37
		37.1
		40.4
		36.9
		38
		38
		37.2
		38
		37.8
		38.7
		39.1
		40.1
		36.8
		36.7
		38.7
		38.9
		38.5
		39.1
		41
		40.1
		39.9
		39.6
		38.1
		38.5
		37.5
		38.4
		38
