# Supplementary material for: Physiological febrile heat stress increases cytoadhesion through increased protein trafficking of Plasmodium falciparum surface proteins into the red blood cell
Source: eLife. 2026 May 13;14:RP107860. doi: 10.7554/eLife.107860 (PMC13171106; doi:10.7554/eLife.107860)
Supplement: Figure 1—source data 4. [file elife-107860-fig1-data4.xlsx]

## Sheet: 1D
No Heat Stress, 37°C Control	0-8 hpi: 38°C	0-8 hpi: 39°C	0-8 hpi: 40°C	0-8 hpi: 41°C	8-16 hpi: 38°C	8-16 hpi: 39°C	8-16 hpi: 40°C	8-16 hpi: 41°C	16-24 hpi: 38°C	16-24 hpi: 39°C	16-24 hpi: 40°C	16-24 hpi: 41°C	24-32 hpi: 38°C	24-32 hpi: 39°C	24-32 hpi: 40°C	24-32 hpi: 41°C	32-40 hpi: 38°C	32-40 hpi: 39°C	32-40 hpi: 40°C	32-40 hpi: 41°C	40-48 hpi: 38°C	40-48 hpi: 39°C	40-48 hpi: 40°C	40-48 hpi: 41°C
4.51	4.55	3.83	2.15	0.81	4.45	4.52	3.6	0.75	4.63	4.41	4.01	0.71	4.4	4.03	0.48	3.36	4	2.93	1.05	0.27	4.09	3.47	1.09	0.35
4.68	4.52	3.41	2.11	0.85	4.04	4.03	3.57	0.73	4.16	4.32	3.96	0.75	4.44	3.92	0.47	3.31	4.36	2.95	1	0.25	4	3.45	1.07	0.36
3.99	4.49	3.69	2.19	0.91	4.33	4.47	3.88	0.75	4.59	4.27	3.81	0.67	4.56	3.77	0.48	3.15	3.85	2.72	1.01	0.24	3.65	3.45	1.09	0.32
4.18
4.57
4.47
