# Supplementary material for: Physiological febrile heat stress increases cytoadhesion through increased protein trafficking of Plasmodium falciparum surface proteins into the red blood cell
Source: eLife. 2026 May 13;14:RP107860. doi: 10.7554/eLife.107860 (PMC13171106; doi:10.7554/eLife.107860)
Supplement: Figure 1—source data 5. [file elife-107860-fig1-data5.xlsx]

## Sheet: 1E
Hours Post Infection	%PfEMP1 (VAR2CSA) NF54 (Replicate 1)	%PfEMP1 (VAR2CSA) NF54 (Replicate 2)	%PfEMP1 (VAR2CSA) NF54 (Replicate 3)
12	0.5	0.6	1.1
16	0.7	0.2	0.9
20	6.3	12.2	15.9
24	48.6	39.5	50.5
28	71.6	60.8
32	75.5	78.2
36	81.1	76.9
40	81.5	83.2	76.4
