# Supplementary material for: Physiological febrile heat stress increases cytoadhesion through increased protein trafficking of Plasmodium falciparum surface proteins into the red blood cell
Source: eLife. 2026 May 13;14:RP107860. doi: 10.7554/eLife.107860 (PMC13171106; doi:10.7554/eLife.107860)
Supplement: Figure 1—source data 7. [file elife-107860-fig1-data7.xlsx]

## Sheet: 1H
No Heat Stress (%PfEMP1) 24 hpi	Post Heat Stress (%PfEMP1) 24 hpi
49	68
40	71
52	63
