# Supplementary material for: Physiological febrile heat stress increases cytoadhesion through increased protein trafficking of Plasmodium falciparum surface proteins into the red blood cell
Source: eLife. 2026 May 13;14:RP107860. doi: 10.7554/eLife.107860 (PMC13171106; doi:10.7554/eLife.107860)
Supplement: Figure 2—figure supplement 1—source data 1. [file elife-107860-fig2-figsupp1-data1.xlsx]

## Sheet: Sheet1
	Normal Media			Furosemide			Reduced Nutrient Media
Replcate	1	2	3	1	2	3	1	2	3
No Heat Stress	4.97295	5.58038	5.30438	3.50367	2.9925	2.793	3.6371	3.61125	2.62695
Heat Stress	4.5061	4.168	4.8345	3.1225	3.20935	2.45072	3.25175	2.8842	2.98275
