# Supplementary material for: Physiological febrile heat stress increases cytoadhesion through increased protein trafficking of Plasmodium falciparum surface proteins into the red blood cell
Source: eLife. 2026 May 13;14:RP107860. doi: 10.7554/eLife.107860 (PMC13171106; doi:10.7554/eLife.107860)
Supplement: Figure 2—figure supplement 2—source data 1. [file elife-107860-fig2-figsupp2-data1.xlsx]

## Sheet: Sheet1
	37 ºC			39 ºC
Replicate:	1	2	3	1	2
- Furosemide	0.789	0.929		1.07833	1.11033
+ Furosemide	0.335	0.109		0.379667	0.155333
No Sorbitol Control	0.228333	0.208667	0.175667	0.379667	0.155333
Saponin Control	3.215	3.67333
uRBC only Control	0.088	0.067667		0.089667	0.082667
