# Supplementary material for: Physiological febrile heat stress increases cytoadhesion through increased protein trafficking of Plasmodium falciparum surface proteins into the red blood cell
Source: eLife. 2026 May 13;14:RP107860. doi: 10.7554/eLife.107860 (PMC13171106; doi:10.7554/eLife.107860)
Supplement: Figure 2—source data 2. [file elife-107860-fig2-data2.xlsx]

## Sheet: 2E
No Heat Stress	With Heat Stress
60.9	78.51
64.9	78.4
58.7	83.7
