# Supplementary material for: Physiological febrile heat stress increases cytoadhesion through increased protein trafficking of Plasmodium falciparum surface proteins into the red blood cell
Source: eLife. 2026 May 13;14:RP107860. doi: 10.7554/eLife.107860 (PMC13171106; doi:10.7554/eLife.107860)
Supplement: Figure 2—source data 3. [file elife-107860-fig2-data3.xlsx]

## Sheet: 2F
No Heat Stress	With Heat Stress
18.5	48.9
6.1	46.6
19	41.3
