# Supplementary material for: Physiological febrile heat stress increases cytoadhesion through increased protein trafficking of Plasmodium falciparum surface proteins into the red blood cell
Source: eLife. 2026 May 13;14:RP107860. doi: 10.7554/eLife.107860 (PMC13171106; doi:10.7554/eLife.107860)
Supplement: Figure 3—figure supplement 1—source data 1. [file elife-107860-fig3-figsupp1-data1.xlsx]

## Sheet: 6A
Normalised Intensity (Heat Stressed)	Normalised Intensity (37C Control)
-0.274369	-0.395734
2.75243	2.71423
-1.50015	-1.28855
1.84496	2.01425
-2.99179	-3.05421
-1.5885	-1.82996
-3.72343	-3.98408
-0.932802	-0.862943
-2.0637	-1.53824
-1.38633	-1.71688
-1.95278	-1.73548
-0.779263	-0.940357
-0.922019	-0.205988
-0.419366	-0.19533
2.79345	2.81856
2.45785	2.2961
0.773744	0.35247
1.21893	1.00725
2.61184	2.38763
2.26619	2.06914
-1.51443	-1.33862
1.3057	1.54302
1.89489	1.98466
2.20656	2.08625
0.396919	0.109501
1.78275	1.5653
2.11541	2.05229
2.31534	2.18102
1.11548	0.917311
-2.03053	-2.78523
-0.753756	-1.20055
0.338666	0.12788
1.79017	1.67661
3.68772	3.58878
1.10329	1.05396
3.37299	3.09811
1.66048	1.36016
3.07436	2.92087
2.18047	2.18581
2.32653	2.34797
1.97363	1.81045
3.61268	3.48969
1.2148	0.841418
0.67331	0.484037
2.13409	2.01066
2.29704	2.27544
-0.153654	-0.33481
3.63007	3.35547
1.87658	1.59886
2.88803	2.8914
0.109099	-0.0378937
1.51158	1.25374
2.72404	2.51975
2.16569	1.93742
-0.210662	-0.608254
1.25177	1.15661
-1.25898	-2.07355
2.46278	2.18242
1.09137	0.779598
2.64571	2.44491
1.59959	1.33811
0.78096	0.354709
-0.663913	-1.1051
2.59861	2.347
2.42873	2.40212
1.86133	1.75907
2.92828	2.76453
1.07976	0.947217
1.42007	0.966411
1.92649	1.72774
0.222888	-0.176583
2.22263	2.13178
1.83075	1.92109
0.0279807	0.132717
1.54249	1.33421
3.49378	3.33763
2.80333	2.46433
0.0886724	-0.0917732
1.51358	1.22776
2.81167	2.51082
3.24104	2.93115
2.918	2.74391
-0.115045	0.14147
-0.0645885	0.0784745
-1.58099	-1.80837
3.34443	3.26302
0.922393	0.971828
0.150064	0.144073
-0.424642	-0.303005
-1.90038	-1.90359
2.14097	2.07902
-1.89657	-1.56012
0.647776	1.12088
3.00425	3.20096
2.62806	2.56027
1.4042	1.19471
-1.80438	-2.21671
0.650436	0.744816
2.16716	2.07727
1.04713	1.36074
1.58013	1.77341
1.70181	1.60993
-1.54656	-1.27387
-2.03907	-1.78457
2.662	2.77245
0.541527	0.528042
-0.526385	-0.340088
0.0176039	-0.125847
-3.12158	-2.55393
-3.10391	-3.18139
-0.101948	-0.0121295
0.68946	0.530492
-0.0123805	0.201926
0.0519218	-0.125679
-0.745902	-0.600277
-2.07897	-2.17408
2.3111	2.39566
-1.92407	-2.13589
-0.809868	-0.4787
0.942836	0.797696
-2.52614	-2.22865
-4.54114	-4.39054
1.86321	2.12643
-0.0372917	-0.104096
-3.78238	-3.39104
-1.16995	-1.20732
-3.18298	-3.67066
-3.88888	-2.97743
1.31827	1.45623
0.399533	1.09688
-1.58733	-1.69981
0.018356	-0.035064
2.72785	2.67679
-1.28129	-1.29777
1.41928	1.25661
-1.95745	-2.07488
-1.1805	-1.18488
-4.73401	-5.03439
2.19459	2.3547
-2.38421	-2.7399
-2.3973	-2.43662
0.205259	0.147793
0.278967	0.345932
-1.18562	-1.17358
-3.88915	-4.33436
-0.646792	-0.886
0.498572	0.536648
1.09444	1.39381
1.16247	1.24396
-0.619708	-0.5884
-0.735563	-0.689681
-3.15872	-3.06269
-3.49405	-3.27148
3.11151	3.53704
-1.8387	-1.10999
0.318991	0.379557
-3.89542	-3.46348
-1.03625	-0.869762
-2.01153	-2.0756
-0.805756	-0.396539
-1.64133	-1.55532
0.358872	0.490992
-3.75958	-4.37988
1.49945	1.63008
-1.48205	-1.62184
1.219	1.32359
1.05469	1.22012
3.5862	3.95308
-0.718756	-0.608727
-0.8355	-0.460824
-3.85722	-3.43313
2.99236	3.0196
-0.244659	-0.487002
-0.718645	-0.627618
2.57162	2.8987
-3.71943	-3.74065
-1.37545	-0.894059
2.61881	2.18114
1.36591	1.49975
0.0655812	0.214924
0.399648	0.129443
-2.87787	-3.64006
-1.04311	-0.983039
-2.52022	-3.26638
-2.71481	-3.04616
1.96127	2.08268
-2.43224	-1.87708
-4.47097	-3.97735
-2.52194	-2.2921
-3.11014	-3.0002
0.205266	0.663892
-2.00621	-2.38369
1.31288	1.06293
-1.04536	-1.08343
-2.37273	-2.8257
-0.99734	-1.206
1.90192	1.9452
0.0117779	0.294103
-1.02147	-0.461159
0.0962255	0.0886786
-1.30007	-0.987777
-2.37594	-2.15427
1.42084	1.59909
-2.95079	-3.09542
-0.392954	-0.16417
-0.589655	-0.753811
-0.217518	-0.243637
-2.26785	-2.15983
-1.45636	-1.31808
0.496548	0.859329
-0.621985	-0.544647
-2.19509	-2.15636
0.308827	0.452625
2.52276	2.42256
1.16551	1.23256
-1.22058	-1.75955
-0.221663	-0.257665
0.828064	0.763542
0.0821334	0.160862
0.202937	0.107133
0.46262	0.886269
-1.30765	-1.98567
-2.45171	-2.65074
-1.88726	-1.76411
-1.80703	-1.71909
-0.356998	0.0272328
-2.24937	-2.15863
-0.673338	-1.18452
-3.20872	-2.96692
-0.604338	-0.968166
-0.835495	-0.635038
-3.02937	-3.67358
-2.53193	-2.69059
-0.435094	-0.721193
-3.34555	-2.82015
-1.09964	-1.07614
-1.18396	-1.1672
-2.27512	-2.21208
-1.8561	-1.6001
4.36289	4.36874
2.35978	2.76457
2.15605	2.28237
3.51719	3.47849
0.127465	0.0782325
-1.76283	-1.6763
-2.0461	-2.34573
2.06806	2.32357
-0.0690106	0.149942
-2.14331	-1.78618
-1.43754	-0.9299
1.34221	1.30883
5.88335	5.86693
1.51632	1.63101
-0.708804	-1.03035
3.49522	3.52774
3.77925	3.90817
1.95341	2.24919
0.408316	0.39041
-2.23504	-1.94074
1.45395	1.27127
3.62297	3.55174
4.67833	5.02843
-2.23727	-2.06561
-0.883378	-0.867822
-2.76065	-1.90589
-0.55394	-0.694562
-5.13999	-3.68059
0.0547035	-0.086267
1.59186	1.62339
3.57376	3.5825
-1.26704	-1.05785
-0.731864	-0.777162
-1.29562	-0.959781
-1.98764	-1.90318
-0.668562	-0.60888
1.09221	0.86838
0.484029	0.585756
-1.16517	-1.30862
1.11896	0.833246
-3.95979	-4.3924
0.289321	0.391456
-2.58878	-2.36463
1.03461	1.18835
-0.707749	-0.703379
-3.47676	-4.77143
-1.0106	-0.825136
1.02749	0.996919
-1.68359	-1.09758
-1.46414	-1.52929
0.651859	0.2952
1.72402	2.00691
-2.62466	-2.4068
-0.716886	-0.848225
-2.1364	-1.93132
1.04801	1.09912
-1.88868	-1.46779
-2.39548	-2.30311
-0.668557	-0.935778
2.09445	2.54724
1.09841	1.3456
-2.34014	-1.48666
-3.95751	-2.77012
-0.512663	-0.277106
-3.69796	-3.15513
-4.41718	-3.02555
1.93231	1.88978
0.0892765	-0.110802
1.44465	1.36886
0.833783	0.919191
-0.352125	-0.182899
0.343351	0.29255
-0.430142	-0.119422
-3.00069	-2.60224
-0.256299	0.147564
5.76947	5.99001
2.23472	2.20093
-2.15094	-2.14198
-0.496513	-0.401212
-2.29795	-2.48821
3.86888	3.64554
-2.14382	-2.52439
-2.05614	-2.13221
0.560145	0.570144
-3.1876	-3.23647
0.114603	0.110954
2.64797	2.62941
-2.35167	-2.36525
1.86393	1.55967
0.934504	1.25406
1.59577	1.72222
3.25869	3.36006
0.694375	0.627907
-0.714577	-0.373334
2.3522	2.26491
5.36205	5.59256
4.99589	5.09645
4.28489	4.36815
2.7298	3.05999
4.99006	5.2646
0.830994	1.1058
-3.35157	-2.63664
0.396716	0.452494
0.0963211	0.229419
-1.59664	-1.73889
-2.17096	-2.38468
1.50897	1.46939
1.54024	1.4486
0.271875	0.056953
1.7001	1.92868
1.01408	1.01107
0.3449	0.00607443
-0.576048	-0.413637
3.62274	3.59855
1.82604	1.79992
0.414838	0.0169225
-1.20156	-1.74758
2.60487	2.80857
-0.911356	-0.760772
-0.204402	-0.133031
2.87704	2.79421
2.98527	3.07347
2.31777	2.28975
0.209973	0.21336
5.70643	5.52379
-0.880469	-0.830299
-0.66569	-0.536904
0.98707	0.949873
1.49489	1.384
2.32245	2.23796
-0.282338	0.0707746
0.809538	0.853321
-2.142	-1.59428
3.39692	3.47818
0.416933	0.352473
4.38384	4.53822
-0.606297	-0.279605
-2.22349	-1.72605
2.84786	3.15528
4.35583	4.51687
-3.12013	-4.08324
0.0879735	0.479944
2.02487	2.15844
2.47344	2.3151
-1.02608	-0.978445
4.32638	4.47533
1.87452	1.74046
-3.3748	-2.90734
-2.42041	-2.63238
-0.567234	-0.425532
2.16066	2.46218
0.0458584	-0.548337
2.24457	2.20743
-1.60791	-1.44474
-0.423048	0.329628
-3.82561	-4.67127
-1.32886	-1.39672
-0.603626	-0.183479
-3.02305	-2.553
-3.04507	-3.30294
1.12696	0.918262
-3.67854	-3.19387
-1.03291	-1.00318
-3.24547	-3.41989
0.148839	0.0582252
-1.65477	-1.4758
0.87388	0.841646
-0.911191	-0.667474
-2.48014	-2.22147
-0.0502845	0.0902817
0.102047	0.493354
-2.50752	-1.61189
1.54537	1.40251
-1.66231	-1.55505
-0.155908	-0.153048
-1.63335	-1.11682
0.362049	0.566739
-0.739322	-0.578358
-0.414828	-0.228898
-0.55367	-0.577703
-1.53258	-1.25989
0.773881	0.685166
1.08615	1.17866
0.322337	0.428144
3.55602	3.46881
1.60177	1.69382
2.19661	2.17844
5.44412	5.49622
-1.68179	-1.52859
0.926598	1.53327
0.771715	0.948171
0.158191	0.343989
2.80423	2.53898
0.25541	0.30964
1.16587	1.48164
2.46977	2.32018
-0.555323	-0.0717054
-1.4148	-1.2805
0.789821	0.586998
-1.30038	-1.69806
-1.93264	-1.49711
5.03209	4.97269
5.22809	5.253
4.49246	4.51493
-0.27215	-0.0467457
-2.78964	-2.02901
1.19908	1.41627
2.60385	2.63449
2.60267	2.35325
1.73815	1.70403
2.27114	2.24645
-4.50875	-3.97746
-2.98823	-3.22463
-0.0180273	0.563465
-1.23042	-1.48466
-3.08121	-3.09754
-1.62511	-0.595071
-2.68558	-2.3219
2.23171	2.53008
0.932028	1.55079
2.86494	2.98072
0.398077	0.782524
1.4645	1.84702
-4.22636	-4.46023
-1.74489	-0.967181
1.20894	1.34658
0.358679	0.904489
-0.547444	-0.613278
-0.945279	-0.567867
0.857414	1.12171
-0.12025	0.262087
-1.33845	-1.22138
0.591036	1.05278
1.98001	2.02792
-1.92535	-2.02892
3.55346	3.57966
-1.57049	-1.94501
-1.92437	-1.76781
3.41082	3.20856
0.0795605	0.229707
-3.15735	-2.29505
-4.95398	-3.98582
-1.34371	-1.77655
-0.535661	-0.555002
-2.4234	-2.31783
-0.12537	-0.22994
0.518546	0.202813
-3.13056	-3.18266
2.2216	2.26954
0.287992	0.289095
-0.8199	-0.497862
1.48802	1.38923
-0.146231	-0.134529
-0.568036	-0.758029
0.039963	-0.234359
0.215671	0.166486
-0.449333	-0.922198
2.03365	1.99609
0.152545	0.249002
-0.0637941	-0.238283
-0.983518	-1.3516
-1.63912	-1.66304
-0.266899	-0.574345
-0.67084	-0.621379
3.52131	3.51594
2.35419	2.33487
0.961962	1.26754
-1.23452	-1.13283
-1.73189	-2.02375
1.46586	1.71148
-0.939152	-1.22426
-3.99508	-3.95312
-0.884842	-0.480614
-1.10108	-0.96977
3.35457	2.94782
2.75089	2.98401
-1.8784	-2.02679
1.99182	2.38542
3.56758	3.54508
0.161615	0.25603
0.871669	0.955442
0.335608	0.293702
-1.50667	-2.12588
-2.97302	-2.78422
0.16078	0.101231
-0.0624398	-0.0958492
2.69234	2.64982
-0.285438	-0.274707
-2.3843	-2.20671
-3.23807	-3.63346
-0.184044	-0.580657
-4.28984	-3.90125
0.396283	0.224267
-1.99002	-1.92388
0.560233	0.519483
-1.46564	-1.49431
-1.16501	-0.83106
-3.97443	-4.61742
2.10915	2.26293
-1.2916	-1.46463
0.201027	0.124734
-3.52744	-3.20779
1.02635	1.18453
-2.45791	-2.09746
-0.47158	-0.567151
1.68771	1.57148
0.913783	0.51458
-0.175943	-0.104888
0.355899	0.010953
-2.06963	-1.81774
1.41172	1.37106
-0.0371015	0.065465
-3.14977	-3.13232
0.500907	0.433527
-0.44282	-0.459813
3.85275	3.61723
-2.44522	-2.50385
1.09673	1.08953
1.19978	1.09884
-1.05087	-0.907313
-0.564466	-0.484868
-0.631066	-0.412226
0.698074	0.605642
0.682067	0.200668
-0.93783	-0.952801
-1.94013	-1.69839
-1.96324	-1.93087
1.01261	0.969449
1.04758	1.24331
1.3742	1.28638
-1.19595	-0.955543
-2.08718	-1.6465
-0.346145	-0.124654
-2.89885	-2.60677
-0.546062	-0.377794
-3.81246	-3.72105
0.714376	1.01746
-2.58595	-2.34123
-4.76867	-3.99348
-0.0297928	0.0583253
-0.604424	-0.425791
-0.85586	-0.673676
-1.3937	-1.03667
-2.7806	-2.92385
-0.631644	-0.439363
1.27637	1.62068
1.53984	1.76089
-3.085	-2.78368
2.18404	2.27983
1.94576	1.94733
2.73386	2.65935
0.612547	0.553841
1.30662	1.48399
1.74842	1.85683
1.39634	1.43905
1.84284	1.88248
2.04298	1.9227
2.70425	2.77868
-3.2138	-3.44585
1.20453	1.28753
2.87917	2.76514
1.37224	1.57137
-4.6625	-5.20501
1.61394	1.9929
-2.33317	-2.49441
-0.0327315	0.0856746
0.273027	0.587486
-1.09981	-1.11374
-1.74457	-1.53032
-3.3143	-4.27516
-2.25683	-2.12291
-1.68978	-1.3278
0.57788	0.280925
-1.42762	-1.42494
1.03526	1.44059
0.0194369	0.0039525
-1.87359	-2.09452
2.68624	2.99567
-2.83599	-3.36631
0.862295	0.831877
-1.28638	-1.38743
1.49485	1.32615
-1.83718	-1.61842
-0.859108	-1.0624
-0.876853	-0.931277
0.07595	-0.0581725
-1.17081	-0.994665
-1.8536	-2.11594
0.763745	1.04799
0.139387	-0.0513024
-0.624945	-0.778452
-1.1144	-0.980625
-4.18171	-2.95508
-2.63806	-2.3656
-3.25554	-3.82652
-2.25701	-2.05564
-2.04057	-2.01299
-0.246328	-0.151495
-2.38011	-2.4761
-0.800194	-0.784708
1.8036	1.82733
-0.125606	-0.576816
-1.96478	-2.00977
1.18781	1.23887
0.224054	0.0534654
-0.273935	-0.0818216
-0.546694	-0.604114
1.13461	1.13466
