# Supplementary material for: Physiological febrile heat stress increases cytoadhesion through increased protein trafficking of Plasmodium falciparum surface proteins into the red blood cell
Source: eLife. 2026 May 13;14:RP107860. doi: 10.7554/eLife.107860 (PMC13171106; doi:10.7554/eLife.107860)
Supplement: Figure 3—figure supplement 1—source data 2. [file elife-107860-fig3-figsupp1-data2.xlsx]

## Sheet: 6B
Normalised Intensity RBC All Proteins	Normalised Intensity P. falciparum Proteins
0.200901	-0.25504
0.146204	0.145474
0.149148	-0.10171
0.037437	0.076678
0.07652	-0.02347
0.141388	0.181457
0.039563	0.367536
0.033085	0.179748
0.066207	0.234482
0.091885	0.216596
0.111136	0.197912
0.070318	0.166674
0.206573	-0.40458
-0.04435	-0.08786
-0.19682	0.270765
0.036224	0.210367
0.07376	0.065718
-0.01412	-0.1595
0.060597	-0.11654
0.063384	0.016072
-0.10802	-0.07437
-0.02365	0.316858
-0.15546	0.226675
0.127341	0.075841
-0.03345	-0.07238
-0.0977	0.413511
0.006478	0.270705
0.008837	-0.00226
-0.25303	-0.19589
-0.12328	-0.24898
-0.10802	-0.12295
0.218628	0.090015
-0.0321	-0.09566
-0.05624	-0.17414
-0.03432	0.079002
0.126047	0.14477
-0.08181	-0.1566
0.032338	0.617445
0.010346	0.255171
-0.04545	0.56769
-0.0617	0.106615
-0.33422	0.131828
0.26096	0.065766
-0.96117	-0.10333
0.111493	-0.02379
0.043148	0.361408
-0.40216	0.377831
0.055077	0.231832
0.032338	0.488327
-0.01087	0.249892
0.090423	0.239058
-0.18585	-0.16246
-0.03872	-0.10941
-0.18558	-0.15029
0.116285	-0.0978
0.066559	-0.22825
0.126183	0.14143
-0.04184	-1.14039
0.125639	0.02315
-0.05146	-0.24494
0.005204	0.013741
-0.16399	-0.01329
-0.06315	0.06143
-0.00426	-0.13524
0.126795	-0.00387
0.099739	-0.04493
0.01512	-0.08698
-0.04278	-0.17915
0.043309	0.019608
0.041881	0.120874
0.117604	0.149777
0.027322	0.189244
-0.06135	0.054951
-0.00849	-0.04312
-0.2298	-0.07739
0.006475	0.055694
-0.05578	0.065408
0.225179	0.07404
0.186938	0.015865
-0.00438	-0.1298
0.109019	-0.18939
0.087555	0.122354
0.087555	0.096005
0.029841	0.249605
-0.07374	0.01691
9.92e-05	-0.09386
-0.38852	0.402481
0.130985	0.129069
0.070583	-0.00782
0.096507	0.19703
0.172235	0.29936
-0.15344	0.235165
0.009671	0.465264
0.036794	0.005505
-0.08821	0.15145
-0.00976	0.006631
0.149148	-0.38941
0.087814	0.473677
0.005113	0.116373
0.079557	0.187425
0.001799	0.116144
0.042881	-0.19507
-0.12133	0.229143
0.039412	-0.59154
0.073068	-0.04421
-0.00047	0.012713
0.115257	0.052466
-0.16147	-0.09443
-0.10393	0.03978
0.16349	0.186929
0.20498	0.347752
0.019917	0.450217
0.232417	0.337627
-0.01087	-0.16339
0.031032	0.096497
0.217101	0.105178
0.078194	0.102299
-0.12396	-0.16684
-0.02156	0.088832
0.064233	-0.20663
-0.13679	0.120107
0.047293	-0.30993
0.087722	-0.25717
-0.15602	-0.45441
-0.00089	-0.08377
-0.02127	-0.30053
0.12877	-0.04586
0.057137	-0.03627
0.084749	-0.04446
-0.18543	0.044487
0.338547	0.152225
0.106311	0.09939
-0.04236	-0.09666
-0.0662	-0.07288
0.010346	-0.05388
	-0.00052
	0.002404
	0.351801
	-0.07172
	-0.07148
	0.178681
	-0.02287
	0.085241
	-0.04611
	0.035541
	0.219745
	0.12096
	0.086867
	-0.09626
	0.061255
	-0.17831
	0.016104
	0.022487
	-0.02224
	-0.23635
	0.076701
	-0.13346
	0.54973
	0.121719
	-0.23376
	-0.59051
	0.014086
	-0.09877
	-0.15568
	-0.23778
	0.041302
	0.092731
	0.303589
	0.217839
	-0.27539
	0.227078
	0.171652
	-0.0439
	0.246169
	0.15096
	-0.12055
	-0.25199
	2.19e-05
	0.366937
	-0.34885
	-0.15831
	0.002099
	0.46324
	0.143423
	0.12595
	0.056829
	-0.15795
	-0.05588
	-0.03522
	-0.14087
	0.112166
	-0.11188
	0.237015
	0.090985
	-0.07431
	-0.09725
	0.00236
	0.04355
	-0.18608
	0.190716
	0.093514
	0.126719
	0.284846
	-0.03886
	0.044488
	-0.00546
	0.236178
	-0.21205
	-0.27051
	-0.02963
	-0.01974
	0.227582
	0.011638
	-0.121
	0.187653
	-0.09204
	0.050294
	-0.13731
	-0.05019
	-0.07585
	0.141989
	-0.45963
	0.159679
	0.00023
	0.23415
	0.282316
	0.304634
	0.336932
	0.336932
	-0.03967
	0.054204
	-0.07309
	-0.0001
	0.096823
	0.077577
	-0.11828
	0.065255
	-0.12958
	0.035329
	-0.02291
	-0.05869
	-0.02145
	-0.12034
	-0.01105
	-0.02022
	0.339521
	0.107555
	0.111423
	0.411296
	-0.03026
	0.035833
	0.163943
	0.059739
	-0.03775
	0.13799
	-0.14552
	0.11784
	0.494801
	0.156393
	0.063764
	0.083939
	-0.02243
	-0.061
	0.038665
	-0.02109
	0.033961
	0.069987
	0.168591
	-0.06386
	-0.21304
	-0.17277
	0.099125
	0.034245
	0.421082
	-0.1009
	0.176495
	0.102647
	-0.22187
	0.055916
	0.021385
	0.357726
	-0.18106
	0.053474
	0.095065
	-0.32035
	-0.16213
	0.030179
	0.361538
	0.149961
	0.323
	-0.11072
	-0.01039
	-0.26555
	-0.02365
	-0.12674
	0.178139
	-0.02449
	0.334661
	-0.0885
	-0.06834
	-0.05023
	-0.08665
	-0.04783
	0.000792
	-0.05558
	0.022605
	0.106246
	-0.18159
	0.105431
	-0.04939
	0.037857
	-0.40045
	0.01452
	-0.15834
	-0.13554
	0.373564
	0.035855
	0.036291
	0.364519
	-0.03221
	0.085501
	-0.16658
	-0.06832
	-0.20166
	-0.2552
	-0.18284
	-0.01728
	-0.0287
	-0.01251
	0.21626
	1.10065
	0.191312
	0.035132
	0.362722
	-0.1183
	0.160206
	0.050527
	-0.09986
	0.016503
	-0.22956
	0.228797
	-0.42269
	0.119365
	0.486209
	-0.0272
	-0.16468
	0.333334
	0.099311
	0.000794
	-0.02195
	1e-05
	-0.17066
	-0.15739
	0.182454
	0.151934
	-0.06174
	0.026666
	0.539237
	-0.03921
	-0.02051
	0.588737
	0.396227
	0.617445
	-0.01322
	0.097682
	0.000344
	0.090296
	-0.15787
	0.205726
	-0.21885
	-0.13436
	-0.19882
	-0.04017
	0.274259
	0.035637
	-0.16609
	0.004639
	0.161785
	-0.11817
