# Supplementary material for: Physiological febrile heat stress increases cytoadhesion through increased protein trafficking of Plasmodium falciparum surface proteins into the red blood cell
Source: eLife. 2026 May 13;14:RP107860. doi: 10.7554/eLife.107860 (PMC13171106; doi:10.7554/eLife.107860)
Supplement: Figure 3—figure supplement 2—source data 1. [file elife-107860-fig3-figsupp2-data1.xlsx]

## Sheet: S7A
Wild Type	FIKK1 KO	FIKK4.1 KO	FIKK4.2 KO	FIKK9s KO	FIKK10.1 KO	FIKK10.2 KO
1.6807	0.641258	0.179819	1.93857	1.40842	1.21464	0.96435
0.80899	0.32317	0.48145	0.71071	0.43563	0.55754	0.24045
1.37125	0.630398	0.96169	1.12801	0.917188	1.18344	0.64891
1.37125	0.630398	0.96169	1.12801	0.917188	1.18344	0.64891
0.90014	0.53401	0.64383	0.76215	0.47545	0.94125	-0.1422
1.20016	0.69308	0.76639	1.17889	0.68366	1.06051	-0.00635
0.89016	0.83035	0.87744	0.99161	0.65295	0.73798	0.24938
1.21012	0.70656	0.79386	1.16036	0.71837	1.06991	-0.02012
1.08054	0.81514	0.92512	1.01842	0.69295	0.82248	0.24799
0.84232	0.47878	0.6147	0.70828	0.57868	0.60463	0.06596
1.207	0.76581	0.691481	0.757196	0.886559	0.969831	0.08695
0.84595	0.48474	0.62926	0.72942	0.60246	0.66843	0.00191
1.15404	0.96935	0.92644	1.17555	0.5602	0.77812	0.12725
1.13619	0.90137	0.94995	1.16724	0.4965	0.78125	-0.00013
1.21559	0.99459	0.92421	1.18615	0.61773	0.81125	0.14588
0.99557	0.7979	0.7967	1.043	0.69397	0.81162	0.186512
0.88967	0.6398	0.70545	0.94465	0.65268	0.7563	0.169632
1.10487	0.85065	0.80382	1.08387	0.798679	0.89875	-0.074719
0.994836	0.796669	0.74199	1.10641	0.346408	0.73624	0.007452
1.01216	0.73498	0.63878	1.02465	0.61879	0.844509	0.1992
1.2353	1.05432	0.780821	1.2306	0.795851	0.820999	0.35282
1.10487	0.85065	0.80382	1.08387	0.798679	0.89875	-0.074719
1.6038	0.571358	0.898011	1.04814	0.630419	0.82864	0.44036
1.39609	0.892559	0.905859	1.25879	0.58745	0.728039	-0.01726
1.07806	0.981258	0.9493	1.28223	0.793381	0.77314	-0.20514
1.2777	0.948708	0.80801	1.22728	0.841599	1.01564	-0.64519
0.972606	0.7838	0.52444	1.47133	0.713269	0.37252	-0.18848
1.13524	1.05347	0.90008	1.17751	0.6381	0.78663	0.191311
1.26523	0.46071	-0.11373	1.20667	0.51065	0.494899	0.257181
1.27327	0.37723	0.2735	1.33049	0.540149	0.21726	0.25865
0.996426	0.389617	-0.67251	1.11315	0.35882	0.54561	0.0016518
1.04436	0.46185	0.06841	1.35592	0.20191	0.386391	0.40885
0.84526	0.46949	0.61875	0.93417	0.2897	0.64638	0.15435
1.06129	0.42425	0.0006408	0.95457	0.59334	0.79973	0.50535
0.96585	0.455	0.55408	1.04597	0.58312	0.55589	0.43341
1.386	0.708099	0.951472	1.19674	0.965879	0.88792	-0.24803
1.31905	0.591749	0.800129	1.17776	0.84764	1.12535	0.09866
1.34554	0.640089	0.85584	1.18593	0.89434	1.02544	-0.03522
0.84855	0.691109	0.53158	0.62911	0.73744	1.00122	0.20565
0.89377	0.61058	0.59151	0.81991	0.93193	0.897	0.35664
1.0375	0.96717	0.67195	1.09413	1.01833	0.99988	-0.07774
1.04727	0.582039	0.732789	0.815006	0.857627	0.952459	0.510221
0.82485	0.18843	0.47625	0.15805	0.25765	0.12418	0.27807
1.03436	0.74108	0.66203	0.49517	0.45064	0.42922	0.47405
0.964287	0.826689	0.89024	0.687445	0.582769	0.7474	0.579831
0.929695	0.644287	0.6588	0.758797	0.691321	0.803961	0.366591
1.16617	0.91425	1.27937	1.17859	0.1548	0.746271	-0.12052
0.93362	0.79894	1.29087	1.15759	-0.02034	0.81212	-0.45155
1.11275	0.359238	0.929809	1.08294	0.72177	0.68976	0.36581
0.83797	0.44852	0.954	0.56658	0.30956	0.62269	0.43348
1.06805	-0.00235	0.5044	0.700256	0.390389	0.206719	0.231989
0.878395	0.52084	1.00892	0.937315	0.608407	0.722941	0.60244
1.07806	0.981258	0.9493	1.28223	0.793381	0.77314	-0.20514
1.2777	0.948708	0.80801	1.22728	0.841599	1.01564	-0.64519
0.972606	0.7838	0.52444	1.47133	0.713269	0.37252	-0.18848
1.13524	1.05347	0.90008	1.17751	0.6381	0.78663	0.191311
0.956165	-0.107892	0.99712	0.482786	0.09566	0.27617	-0.042731
0.929695	0.644287	0.6588	0.758797	0.691321	0.803961	0.366591
1.386	0.708099	0.951472	1.19674	0.965879	0.88792	-0.24803
1.31905	0.591749	0.800129	1.17776	0.84764	1.12535	0.09866
1.34554	0.640089	0.85584	1.18593	0.89434	1.02544	-0.03522
0.90014	0.53401	0.64383	0.76215	0.47545	0.94125	-0.1422
0.969952	0.614352	0.740259	1.82097	0.501913	0.985025	0.550629
