# Supplementary material for: Physiological febrile heat stress increases cytoadhesion through increased protein trafficking of Plasmodium falciparum surface proteins into the red blood cell
Source: eLife. 2026 May 13;14:RP107860. doi: 10.7554/eLife.107860 (PMC13171106; doi:10.7554/eLife.107860)
Supplement: Figure 3—figure supplement 7—source data 1. [file elife-107860-fig3-figsupp7-data1.xlsx]

## Sheet: S12A
37C Control			16-24 (39C)			16-24 (40C)			24-32 (39C)			24-32 (40C)			37C Control			16-24 (39C)			16-24 (40C)			24-32 (39C)			24-32 (40C)
5.7	6.3	6.5	6.5	5.9	6.4	6.1	5.9	5.6	5.3	5.1	5.3	4.1	5	4.6	6	6.5	5.3	6.1	6	6.1	6.5	6.4	5.8	5	4.8	4.5	4.1	4.5
