# Supplementary material for: Physiological febrile heat stress increases cytoadhesion through increased protein trafficking of Plasmodium falciparum surface proteins into the red blood cell
Source: eLife. 2026 May 13;14:RP107860. doi: 10.7554/eLife.107860 (PMC13171106; doi:10.7554/eLife.107860)
Supplement: Figure 3—figure supplement 7—source data 2. [file elife-107860-fig3-figsupp7-data2.xlsx]

## Sheet: S12B
DMSO 37 °C Control			DMSO 16-24 (39 °C)			DMSO 16-24 (40 °C)			DMSO 24-32 (39 °C)			DMSO 24-32 (40 °C)			37 °C Control			16-24 (39 °C)			16-24 (40 °C)			24-32 (39 °C)			24-32 (40 °C)
24.8	25	24.8	25	25.5	25.7	23.5	23.6	23.4	21.3	20.5	20.4	17.9	18.1	19.1	25.5	22.8	25.1	24.5	24.1	25.3	25.2	24.5	23.2	19.2	19.8	18.9	18.5	18.9	18
