# Supplementary material for: Physiological febrile heat stress increases cytoadhesion through increased protein trafficking of Plasmodium falciparum surface proteins into the red blood cell
Source: eLife. 2026 May 13;14:RP107860. doi: 10.7554/eLife.107860 (PMC13171106; doi:10.7554/eLife.107860)
Supplement: Figure 3—figure supplement 8—source data 1. [file elife-107860-fig3-figsupp8-data1.xlsx]

## Sheet: S13B
HSP70x 37C	HSP70x 39C	HSP70x 37C RAP	HSP70x 39C RAP
21.8	43.2	19.4	42
22.7	41.9	22.7	41.6
26.8	46.5	26.5	51.1
