# Supplementary material for: Physiological febrile heat stress increases cytoadhesion through increased protein trafficking of Plasmodium falciparum surface proteins into the red blood cell
Source: eLife. 2026 May 13;14:RP107860. doi: 10.7554/eLife.107860 (PMC13171106; doi:10.7554/eLife.107860)
Supplement: Figure 3—figure supplement 8—source data 2. [file elife-107860-fig3-figsupp8-data2.xlsx]

## Sheet: S13C
HSP70x 37C	HSP70x 39C	HSP70x 37C RAP	HSP70x 39C RAP
905	1104	877	1040
1009	914	860	939
844	1115	894	988
