# Supplementary material for: Physiological febrile heat stress increases cytoadhesion through increased protein trafficking of Plasmodium falciparum surface proteins into the red blood cell
Source: eLife. 2026 May 13;14:RP107860. doi: 10.7554/eLife.107860 (PMC13171106; doi:10.7554/eLife.107860)
Supplement: Figure 3—figure supplement 8—source data 4. [file elife-107860-fig3-figsupp8-data4.xlsx]

## Sheet: S14E
HSP70x 37C	HSP70x 39C	HSP70x 37C RAP	HSP70x 39C RAP
11831	12443	12368	11724
12708	14498	12368	14777
14495	14312	15412	12226
