# Supplementary material for: Physiological febrile heat stress increases cytoadhesion through increased protein trafficking of Plasmodium falciparum surface proteins into the red blood cell
Source: eLife. 2026 May 13;14:RP107860. doi: 10.7554/eLife.107860 (PMC13171106; doi:10.7554/eLife.107860)
Supplement: Figure 3—figure supplement 9—source data 1. [file elife-107860-fig3-figsupp9-data1.xlsx]

## Sheet: S14B
DMSO - 37C	DMSO - 39C	RAP - 37C	RAP - 40C
37.5	69.1	50.4	63.5
42.5	67.4	45	75.5
50.8	59.7	50.4	62.5
