# Supplementary material for: Physiological febrile heat stress increases cytoadhesion through increased protein trafficking of Plasmodium falciparum surface proteins into the red blood cell
Source: eLife. 2026 May 13;14:RP107860. doi: 10.7554/eLife.107860 (PMC13171106; doi:10.7554/eLife.107860)
Supplement: Figure 3—figure supplement 10—source data 1. [file elife-107860-fig3-figsupp10-data1.xlsx]

## Sheet: S15A
37C DMSO	37C RAP	16-24 39C DMSO	16-24 39C RAP	16-24 40C DMSO	16-24 40C RAP	24-32 39C DMSO	24-32 39C RAP	24-32 40C DMSO	16-24 40C RAP
4.2	4	4	4.2	3.6	4	3.6	3.1	2.8	3.3
4.3	4	4.4	4	3.9	4.3	3.5	3.5	2.9	3.3
4.1	3.9	4.1	3.9	4.2	3.7	3.4	2.8	3.2	2.9
