# Supplementary material for: Physiological febrile heat stress increases cytoadhesion through increased protein trafficking of Plasmodium falciparum surface proteins into the red blood cell
Source: eLife. 2026 May 13;14:RP107860. doi: 10.7554/eLife.107860 (PMC13171106; doi:10.7554/eLife.107860)
Supplement: Figure 3—figure supplement 10—source data 2. [file elife-107860-fig3-figsupp10-data2.xlsx]

## Sheet: S15B
37C DMSO	37C RAP	16-24 39C DMSO	16-24 39C RAP	16-24 40C DMSO	16-24 40C RAP	24-32 39C DMSO	24-32 39C RAP	24-32 40C DMSO	16-24 40C RAP
19.1	18.5	18.2	18.7	16.9	17.5	15.9	14.5	12.9	14.3
18.5	18.4	18.9	17.8	17.2	18.9	14.9	15	13.5	13.9
17.8	17.7	18.7	18.2	17.8	17	15.2	13.2	14	12.7
