# Supplementary material for: Physiological febrile heat stress increases cytoadhesion through increased protein trafficking of Plasmodium falciparum surface proteins into the red blood cell
Source: eLife. 2026 May 13;14:RP107860. doi: 10.7554/eLife.107860 (PMC13171106; doi:10.7554/eLife.107860)
Supplement: Figure 3—figure supplement 11—source data 1. [file elife-107860-fig3-figsupp11-data1.xlsx]

## Sheet: S16B
HSP70x 37C	HSP70x 39C	HSP70x 37C RAP	HSP70x 39C RAP
10.9	24.6	11.4	21.4
13.8	25.6	13.8	22.5
15.2	24.7	15.9	30.2
