# Supplementary material for: Physiological febrile heat stress increases cytoadhesion through increased protein trafficking of Plasmodium falciparum surface proteins into the red blood cell
Source: eLife. 2026 May 13;14:RP107860. doi: 10.7554/eLife.107860 (PMC13171106; doi:10.7554/eLife.107860)
Supplement: Figure 3—figure supplement 11—source data 2. [file elife-107860-fig3-figsupp11-data2.xlsx]

## Sheet: S16C
HSP70x 37C	HSP70x 39C	HSP70x 37C RAP	HSP70x 39C RAP
703	935	834	989
1030	801	816	959
836	934	748	882
