# Supplementary material for: Physiological febrile heat stress increases cytoadhesion through increased protein trafficking of Plasmodium falciparum surface proteins into the red blood cell
Source: eLife. 2026 May 13;14:RP107860. doi: 10.7554/eLife.107860 (PMC13171106; doi:10.7554/eLife.107860)
Supplement: Figure 3—figure supplement 11—source data 4. [file elife-107860-fig3-figsupp11-data4.xlsx]

## Sheet: S16E
HSP70x 37C	HSP70x 39C	HSP70x 37C RAP	HSP70x 39C RAP
4363	3819	4757	5553
6254	5033	4485	4732
5488	4954	5985	4242
