# Supplementary material for: Physiological febrile heat stress increases cytoadhesion through increased protein trafficking of Plasmodium falciparum surface proteins into the red blood cell
Source: eLife. 2026 May 13;14:RP107860. doi: 10.7554/eLife.107860 (PMC13171106; doi:10.7554/eLife.107860)
Supplement: Figure 3—figure supplement 12—source data 1. [file elife-107860-fig3-figsupp12-data1.xlsx]

## Sheet: S17B
DMSO - 37C	DMSO - 39C	RAP - 37C	RAP - 40C
19.9	29.9	18.3	34.6
21.1	34.6	22.5	30.4
19.4	29.9	22.5	26.7
