# Supplementary material for: Physiological febrile heat stress increases cytoadhesion through increased protein trafficking of Plasmodium falciparum surface proteins into the red blood cell
Source: eLife. 2026 May 13;14:RP107860. doi: 10.7554/eLife.107860 (PMC13171106; doi:10.7554/eLife.107860)
Supplement: Figure 3—source data 1. [file elife-107860-fig3-data1.xlsx]

## Sheet: 3B-3C
Leading proteins ID	Gene Name	Product Description	Log2FC [WT (Post Heat Stress)/WT (No Heat Stress)]	Average WT (No Heat Stress)	Average WT (Post Heat Stress)	WT1	WT2	WT1 (heat)	WT2 (heat)	All Possible Protein IDs	Positions within proteins	Amino acid	Multiplicity	Phospho (STY) Probabilities	Position in peptide	Sequence window
PF3D7_0402000		Plasmodium exported protein (PHISTa), unknown function	3.40641	0.535242	3.94165	0.44442	0.626064	3.74323	4.14007	PF3D7_0402000	224	S	___1	FGS(1)YEQVLISQPHEFNER	3	QKYGRCYEERPNRFGSYEQVLISQPHEFNER
PF3D7_0424700	FIKK4.2	serine/threonine protein kinase, FIKK family	2.61403	0.818248	3.43227	0.93367	0.702826	3.14098	3.72357	PF3D7_0424700	250	S	___1	VYS(1)WELGKEALTK	3	CKVENVENINYERVYSWELGKEALTKLLGCS
PF3D7_0702500		Plasmodium exported protein, unknown function	2.37659	-2.70628	-0.32969	-2.50655	-2.90602	-0.403839	-0.255541	PF3D7_0702500	206	S	___3	NY(0.004)S(0.996)LGNLS(0.007)T(0.006)GT(0.005)T(0.004)S(0.014)QGS(0.492)T(0.492)S(0.52)S(0.459)R	18	SLGNLSTGTTSQGSTSSRHYSLGGQPSSSGR
PF3D7_0731100	PTP2	EMP1-trafficking protein	2.1387	-0.500012	1.63869	-0.561769	-0.438255	1.48379	1.79358	PF3D7_0731100	159	S	___1	APS(0.999)GS(0.001)LFNSPENFQGGYK	3	NKQDSFENEGYYRAPSGSLFNSPENFQGGYK
PF3D7_0731100	PTP2	EMP1-trafficking protein	2.08597	-1.96981	0.116165	-1.95018	-1.98944	-0.16375	0.39608	PF3D7_0731100	165	S	___1	APSGS(0.001)LFNS(0.999)PENFQGGYK	9	ENEGYYRAPSGSLFNSPENFQGGYKNEENPR
PF3D7_0731100	PTP2	EMP1-trafficking protein	2.08478	3.44183	5.52661	3.50299	3.38067	5.38701	5.66621	PF3D7_0731100	231	S	___1	IS(0.054)S(0.943)GS(0.003)FISRPENIQGIAK	3	NIQGAGKIEEGSRISSGSFISRPENIQGIAK
PF3D7_0731100	PTP2	EMP1-trafficking protein	2.05589	-1.48323	0.57266	-1.28658	-1.67987	0.38245	0.762871	PF3D7_0731100	281	T	___1	MPS(0.039)GT(0.961)FFDGIENLQR	5	QGTLKNEENPRMPSGTFFDGIENLQRVHKTE
PF3D7_1039000	FIKK10.2	serine/threonine protein kinase, FIKK family	2.04133	-2.19088	-0.149545	-2.24249	-2.13927	-0.44713	0.148041	PF3D7_1039000	249	Y	___1	DKGIY(0.918)Y(0.082)K	5	EKIELVNGNSKDKGIYYKNNLGNEKKNDYRT
PF3D7_0935900	REX1	ring-exported protein 1	1.99844	-2.01027	-0.0118341	-1.856	-2.16455	-0.213209	0.189541	PF3D7_0935900	594	T	___1	GS(0.03)S(0.127)T(0.617)S(0.141)DKNT(0.042)T(0.042)ENQLNAEAQS(0.001)EVKPQWQK	4	DALAKKESEAPKGSSTSDKNTTENQLNAEAQ
PF3D7_1149000	Pf332	antigen 332, DBL-like protein	1.97862	1.26048	3.23911	1.20839	1.31257	3.25828	3.21993	PF3D7_1149000	79	S	___1	S(1)LADYKDIFQGK	1	KHDESCDEFCDAWNRSLADYKDIFQGKDMWN
PF3D7_1016700		Plasmodium exported protein (PHISTc), unknown function	1.95299	0.631873	2.58487	0.654531	0.609215	2.44439	2.72534	PF3D7_1016700	321	S	___1	NT(0.002)S(0.998)QGNFQR	3	YDLNGYNHKMDGRNTSQGNFQRDLYVEENSR
PF3D7_0702500		Plasmodium exported protein, unknown function	1.93557	2.63029	4.56586	2.62407	2.63651	4.1996	4.93211	PF3D7_0702500	217	S	___2	HYSLGGQPS(0.95)S(0.049)S(0.001)GR	9	QGSTSSRHYSLGGQPSSSGRSFSGSKYNTSN
PF3D7_0702500		Plasmodium exported protein, unknown function	1.85082	4.99415	6.84497	5.00313	4.98516	6.74128	6.94865	PF3D7_0702500	180	S	___1	KEHS(0.992)T(0.008)HDLPAGR	4	VGSHSVSSQEHKKEHSTHDLPAGRNYSLGNL
PF3D7_0702500		Plasmodium exported protein, unknown function	1.84647	2.78495	4.63142	2.79304	2.77687	4.27447	4.98837	PF3D7_0702500	211	S	___2	HYS(1)LGGQPSSSGR	3	STGTTSQGSTSSRHYSLGGQPSSSGRSFSGS
PF3D7_0702500		Plasmodium exported protein, unknown function	1.8135	3.22302	5.03652	3.23388	3.21217	4.90929	5.16376	PF3D7_0702500	181	T	___1	KEHS(0.114)T(0.886)HDLPAGR	5	GSHSVSSQEHKKEHSTHDLPAGRNYSLGNLS
PF3D7_0702400	SEMP1	small exported membrane protein 1	1.79687	6.41585	8.21272	6.4895	6.3422	7.99106	8.43437	PF3D7_0702400	31	S	___1	KFNPTRNPS(1)QSGPYR	9	AANTQEKKFNPTRNPSQSGPYRHHGPQGRTP
PF3D7_0731100	PTP2	EMP1-trafficking protein	1.71212	-0.103951	1.60817	-0.145409	-0.0624943	1.50455	1.71178	PF3D7_0731100	719	T	___1	YNT(1)QQNSK	3	EKFNKTRDHSNNRYNTQQNSKGSNISEVRKK
PF3D7_0801000		Plasmodium exported protein (PHISTc), unknown function	1.68887	2.34711	4.03597	2.43043	2.26378	3.85088	4.22107	PF3D7_0801000	501	S	___1	LQS(1)VEGK	3	PSKFNKKNLFEQRLQSVEGKNFFEGRSQNLE
PF3D7_0731100	PTP2	EMP1-trafficking protein	1.64314	0.316194	1.95933	0.284801	0.347586	1.77092	2.14774	PF3D7_0731100	279	S	___1	MPS(1)GTFFDGIENLQR	3	NFQGTLKNEENPRMPSGTFFDGIENLQRVHK
PF3D7_1325400		conserved Plasmodium protein, unknown function	1.64018	-5.12065	-3.48047	-4.71819	-5.5231	-3.72805	-3.23289	PF3D7_1325400	791	S	___2	RY(0.998)Y(0.447)S(0.555)INHK	4	VKEFDKVVNNMKRYYSINHKTNKKWNLSEYC
PF3D7_1325400		conserved Plasmodium protein, unknown function	1.64018	-5.12065	-3.48047	-4.71819	-5.5231	-3.72805	-3.23289	PF3D7_1325400	789	Y	___2	RY(0.998)Y(0.447)S(0.555)INHK	2	EGVKEFDKVVNNMKRYYSINHKTNKKWNLSE
PF3D7_0702500		Plasmodium exported protein, unknown function	1.62673	2.79725	4.42397	2.77923	2.81527	4.29187	4.55608	PF3D7_0702500	191	S	___2	NYS(1)LGNLSTGTTSQGSTSSR	3	KKEHSTHDLPAGRNYSLGNLSTGTTSQGSTS
PF3D7_0731100	PTP2	EMP1-trafficking protein	1.62169	-1.20136	0.420335	-1.05938	-1.34333	0.25993	0.58074	PF3D7_0731100	448	S	___1	YT(0.11)S(0.89)GSFYNGNSNYQTSYK	3	NFSGSKITEENNRYTSGSFYNGNSNYQTSYK
PF3D7_0702500		Plasmodium exported protein, unknown function	1.61665	-3.59889	-1.98224	-3.57377	-3.62401	-2.14958	-1.8149	PF3D7_0702500	200	T	___3	NYS(0.031)LGNLS(0.395)T(0.452)GT(0.534)T(0.537)S(0.065)QGS(0.826)T(0.146)S(0.01)S(0.003)R	12	PAGRNYSLGNLSTGTTSQGSTSSRHYSLGGQ
PF3D7_0402000		Plasmodium exported protein (PHISTa), unknown function	1.58114	-0.248443	1.3327	-0.15917	-0.337715	1.08766	1.57773	PF3D7_0402000	151	S	___1	KLS(1)QDYNDVNKK	3	RGTQNTETKKSNKKLSQDYNDVNKKFTKEQM
PF3D7_1039000	FIKK10.2	serine/threonine protein kinase, FIKK family	1.54253	-1.10058	0.441951	-1.05168	-1.14948	0.248041	0.63586	PF3D7_1039000	509	T	___1	IPT(1)LGFCK	3	VNNIKYSEWNLERIPTLGFCKEDDRVQEMFK
PF3D7_1353100		Plasmodium exported protein, unknown function	1.54226	-1.38318	0.159075	-1.47367	-1.2927	-0.0117397	0.329889	PF3D7_1353100	107	T	___2	AHHT(0.977)GERT(0.529)S(0.467)Y(0.024)T(0.003)EVK	4	DHHEETEDVNHKAHHTGERTSYTEVKHRRSS
PF3D7_0922500	PGK	phosphoglycerate kinase	1.52828	0.943703	2.47198	0.68936	1.19805	2.28871	2.65526	PF3D7_0922500	7	S	___1	LS(1)ISDLK	2	_________MLGNKLSISDLKDIKNKKVLVR
PF3D7_1353100		Plasmodium exported protein, unknown function	1.52235	-1.72106	-0.198714	-1.86919	-1.57294	-0.370539	-0.0268898	PF3D7_1353100	111	T	___2	T(0.991)S(0.009)YTEVK	1	ETEDVNHKAHHTGERTSYTEVKHRRSSSNSH
PF3D7_0501200	PIESP2	parasite-infected erythrocyte surface protein	1.50865	-0.441037	1.06761	-0.311649	-0.570425	0.947561	1.18766	PF3D7_0501200	177	T	___1	GYYNVFFENYANDT(0.5)ES(0.5)NVHNKPEEVHK	14	LKGYYNVFFENYANDTESNVHNKPEEVHKHE
PF3D7_0113200		Plasmodium exported protein, unknown function	1.48808	0.230477	1.71856	0.33659	0.124365	1.6785	1.75862	PF3D7_0113200	396	S	___1	HES(1)LHS(0.998)Y(0.001)NIKET(0.001)PK	6	NDKIRKSNNRHESLHSYNIKETPKKNKKKSQ
PF3D7_0212800	MATE	multidrug efflux pump, putative	1.47442	-3.77335	-2.29892	-3.84431	-3.70238	-2.31267	-2.28518	PF3D7_0212800	177	T	___1	NFYS(0.092)NPT(0.773)EVNY(0.112)NS(0.022)LLS(0.001)NNLK	7	IHYHTKKNKNFYSNPTEVNYNSLLSNNLKHN
PF3D7_0922500	PGK	phosphoglycerate kinase	1.46232	-1.77026	-0.30794	-1.76074	-1.77979	-0.516579	-0.0993004	PF3D7_0922500	114	S	___1	ENS(1)VILLENLR	3	VGKEVEDKINAAKENSVILLENLRFHIEEEG
PF3D7_0702500		Plasmodium exported protein, unknown function	1.45869	3.63216	5.09085	3.81613	3.44818	5.00067	5.18103	PF3D7_0702500	237	S	___1	YNTSNLASS(0.006)S(0.991)T(0.002)TESSVSGLNTNEAHV	10	SFSGSKYNTSNLASSSTTESSVSGLNTNEAH
PF3D7_1106800	pTKL	protein kinase, putative	1.45414	0.375853	1.82999	0.36994	0.381765	1.91803	1.74195	PF3D7_1106800	508	S	___1	S(0.662)LQNS(0.338)NGEYYLINHLSK	1	EKKKKNIIKFIKNNKSLQNSNGEYYLINHLS
PF3D7_0702500		Plasmodium exported protein, unknown function	1.4508	2.27902	3.72982	2.26311	2.29494	3.62241	3.83723	PF3D7_0702500	204	S	___2	NYS(0.977)LGNLS(0.023)TGTTS(0.002)QGS(0.987)T(0.01)SSR	16	NYSLGNLSTGTTSQGSTSSRHYSLGGQPSSS
PF3D7_0702500		Plasmodium exported protein, unknown function	1.43675	0.610798	2.04755	0.61907	0.602526	1.94168	2.15342	PF3D7_0702500	161	S	___3	NS(0.153)S(0.825)QHS(0.968)VGS(0.107)HS(0.918)VS(0.026)S(0.004)QEHK	3	TENHLSGSNSDGRNSSQHSVGSHSVSSQEHK
PF3D7_0702500		Plasmodium exported protein, unknown function	1.42652	1.00606	2.43258	1.046	0.966125	2.31204	2.55313	PF3D7_0702500	196	S	___2	NYS(0.001)LGNLS(0.958)T(0.03)GT(0.011)T(0.001)S(0.009)QGS(0.839)T(0.126)S(0.02)S(0.006)R	8	THDLPAGRNYSLGNLSTGTTSQGSTSSRHYS
PF3D7_1039000	FIKK10.2	serine/threonine protein kinase, FIKK family	1.4265	-3.15322	-1.72671	-3.11235	-3.19409	-1.98083	-1.4726	PF3D7_1039000	303	Y	___1	IRENIY(1)HGLEK	6	EENIDYNKERIRENIYHGLEKIEEEIKERME
PF3D7_0702500		Plasmodium exported protein, unknown function	1.4145	0.780363	2.19487	0.78087	0.779856	2.10006	2.28967	PF3D7_0702500	169	S	___3	NSSQHSVGS(0.008)HS(0.992)VSSQEHK	11	NSDGRNSSQHSVGSHSVSSQEHKKEHSTHDL
PF3D7_0807200		conserved Plasmodium membrane protein, unknown function	1.41112	1.46087	2.87199	1.34362	1.57812	2.89717	2.84681	PF3D7_0807200	17	S	___1	LS(0.004)S(0.995)LITQNIK	3	KTMSMIHEVGLNKLSSLITQNIKQKIIKRKD
PF3D7_0702400	SEMP1	small exported membrane protein 1	1.403	-2.05186	-0.648854	-2.13143	-1.97228	-0.80691	-0.490799	PF3D7_0702400	47	Y	___1	T(0.009)PY(0.991)MQLHK	3	QSGPYRHHGPQGRTPYMQLHKNQNNNMVNKI
PF3D7_0932200	PFN	profilin	1.40213	-6.87337	-5.47124	-6.5221	-7.22464	-5.70008	-5.24241	PF3D7_0932200	5	Y	___1	AEEY(0.536)S(0.45)WDS(0.013)Y(0.002)LNDR	4	___________MAEEYSWDSYLNDRLLATNQ
PF3D7_0702500		Plasmodium exported protein, unknown function	1.39239	0.203287	1.59568	0.19076	0.215815	1.46709	1.72427	PF3D7_0702500	167	S	___2	NS(0.534)S(0.491)QHS(0.957)VGS(0.854)HS(0.145)VS(0.016)S(0.004)QEHK	9	GSNSDGRNSSQHSVGSHSVSSQEHKKEHSTH
PF3D7_0922500	PGK	phosphoglycerate kinase	1.38046	-1.67747	-0.297009	-1.78726	-1.56768	-0.42272	-0.171299	PF3D7_0922500	377	S	___1	KGAITIVGGGDT(0.021)AS(0.979)LVEQQNK	14	TKKGAITIVGGGDTASLVEQQNKKNEISHVS
PF3D7_0500800	MESA	mature parasite-infected erythrocyte surface antigen	1.37235	2.53942	3.91177	2.61144	2.4674	3.84119	3.98234	PF3D7_0500800	547	S	___2	VIGS(1)EKT(1)QKEIK	4	DVKEKNDGKKDKVIGSEKTQKEIKEKVEKRV
PF3D7_0500800	MESA	mature parasite-infected erythrocyte surface antigen	1.37235	2.53942	3.91177	2.61144	2.4674	3.84119	3.98234	PF3D7_0500800	550	T	___2	VIGS(1)EKT(1)QKEIK	7	EKNDGKKDKVIGSEKTQKEIKEKVEKRVKKK
PF3D7_1149000	Pf332	antigen 332, DBL-like protein	1.37014	1.99111	3.36125	2.21081	1.77142	3.33722	3.38528	PF3D7_1149000	4498	S	___1	QVS(1)VTEDIVEK	3	LEEETATEEIVEKQVSVTEDIVEKEGSVNEE
PF3D7_1149000	Pf332	antigen 332, DBL-like protein	1.36647	2.07788	3.44436	2.2935	1.86226	3.46365	3.42506	PF3D7_1149000	4500	T	___1	QVS(0.277)VT(0.723)EDIVEK	5	EETATEEIVEKQVSVTEDIVEKEGSVNEEII
PF3D7_0702500		Plasmodium exported protein, unknown function	1.35437	0.989263	2.34364	0.96084	1.01768	2.22453	2.46274	PF3D7_0702500	169	S	___2	NSSQHSVGS(0.008)HS(0.992)VSSQEHK	11	NSDGRNSSQHSVGSHSVSSQEHKKEHSTHDL
PF3D7_0424600		Plasmodium exported protein (PHISTb), unknown function	1.34326	0.697483	2.04074	0.538841	0.856125	1.94947	2.13201	PF3D7_0424600	157	S	___1	Y(0.002)NS(0.004)NY(0.011)S(0.982)PIPY(0.001)PEQYNPVDYNK	6	KLIDDINKFRYNSNYSPIPYPEQYNPVDYNK
PF3D7_1201000		Plasmodium exported protein (PHISTb), unknown function	1.34232	0.678178	2.0205	0.82773	0.528625	1.9375	2.1035	PF3D7_1201000	403	S	___1	AVPQNS(0.971)GS(0.029)NFDEFLDVK	6	KVSNIKNNLRAVPQNSGSNFDEFLDVKEANE
PF3D7_1358700	YOP1L	YOP1-like protein, putative	1.33932	2.50058	3.8399	2.50941	2.49174	4.02449	3.6553	PF3D7_1358700	148	S	___1	SIVS(1)KKDLY	4	EKSNKKIHNKIKSIVSKKDLY__________
PF3D7_1478600	PTP3	EMP1-trafficking protein;Plasmodium exported protein (hyp17), unknown function, pseudogene	1.33362	-0.140132	1.19349	-0.139189	-0.141075	0.924141	1.46283	PF3D7_1478600;PF3D7_1477000	1162;913	S	___1	VKDIVS(1)K	6	GTKTKDGLNKVKDIVSKKCGIDVESDIDIET
PF3D7_0922500	PGK	phosphoglycerate kinase	1.3296	-0.481028	0.84857	-0.65798	-0.304075	0.470221	1.22692	PF3D7_0922500	9	S	___1	LS(0.334)IS(0.666)DLK	4	_______MLGNKLSISDLKDIKNKKVLVRVD
PF3D7_0731100	PTP2	EMP1-trafficking protein	1.32817	0.442122	1.7703	0.41272	0.471525	1.68112	1.85947	PF3D7_0731100	255	S	___1	NEES(0.001)S(0.001)RIPS(0.836)GS(0.162)FFNSPQNFQGTLK	9	NIQGIAKNEESSRIPSGSFFNSPQNFQGTLK
PF3D7_0401800	PfD80	Plasmodium exported protein (PHISTb), unknown function	1.32618	1.85099	3.17718	1.93266	1.76933	3.05123	3.30312	PF3D7_0401800	282	S	___2	LPSTGS(0.979)T(0.021)IR	6	TGSTSGSTTRLPSTGSTIRFPSTGSSRLEDY
PF3D7_0501200	PIESP2	parasite-infected erythrocyte surface protein	1.32345	2.35573	3.67918	2.27312	2.43834	3.48186	3.8765	PF3D7_0501200	179	S	___1	GYYNVFFENYANDT(0.001)ES(0.999)NVHNKPEEVHK	16	GYYNVFFENYANDTESNVHNKPEEVHKHEEI
PF3D7_0702500		Plasmodium exported protein, unknown function	1.31897	1.08517	2.40414	1.0712	1.09914	2.30914	2.49914	PF3D7_0702500	164	S	___3	NS(0.458)S(0.542)QHS(1)VGSHSVSSQEHKK	6	HLSGSNSDGRNSSQHSVGSHSVSSQEHKKEH
PF3D7_0402400	GEXP18	Plasmodium exported protein, unknown function	1.31265	0.0488033	1.36145	0.0742111	0.0233955	1.19706	1.52585	PF3D7_0402400	117	S	___1	DHIS(1)ENVK	4	EKYVDNYEYNVRDHISENVKLGNDSIGDNIS
PF3D7_0702500		Plasmodium exported protein, unknown function	1.30487	-2.21018	-0.90531	-2.14535	-2.27501	-1.06889	-0.74173	PF3D7_0702500	199	T	___3	NYS(0.002)LGNLS(0.523)T(0.57)GT(0.68)T(0.302)S(0.218)QGS(0.607)T(0.078)S(0.017)S(0.004)R	11	LPAGRNYSLGNLSTGTTSQGSTSSRHYSLGG
PF3D7_0501000		Plasmodium exported protein, unknown function	1.2938	0.496713	1.79051	0.695921	0.297504	1.83	1.75103	PF3D7_0501000	136	S	___1	NPCAIPQDDLS(1)NEGIEIIDYVDKKEEEK	11	HNPEKNPCAIPQDDLSNEGIEIIDYVDKKEE
PF3D7_0401800	PfD80	Plasmodium exported protein (PHISTb), unknown function	1.27812	2.89663	4.17475	2.82411	2.96915	4.12654	4.22296	PF3D7_0401800	139	T	___1	S(0.002)AS(0.016)AAS(0.975)T(0.961)T(0.952)RS(0.092)AS(0.046)AAS(0.836)T(0.106)T(0.015)R	7	TASAASTTRSASAASTTRSASAASTTRSASA
PF3D7_0113200		Plasmodium exported protein, unknown function	1.27401	-0.190227	1.08378	-0.130339	-0.250114	1.14119	1.02637	PF3D7_0113200	188	S	___2	NQS(1)IS(0.531)S(0.469)NNNNNNNKEEEEECTK	3	KKDKRNISISNKRNQSISSNNNNNNNKEEEE
PF3D7_0113200		Plasmodium exported protein, unknown function	1.27309	0.119534	1.39262	0.188292	0.0507755	1.42688	1.35836	PF3D7_0113200	190	S	___2	NQS(0.002)IS(0.977)S(0.021)NNNNNNNKEEEEECTK	5	DKRNISISNKRNQSISSNNNNNNNKEEEEEC
PF3D7_1353100		Plasmodium exported protein, unknown function	1.27096	1.68545	2.9564	1.76669	1.6042	2.86532	3.04749	PF3D7_1353100	112	S	___1	T(0.025)S(0.975)YTEVK	2	TEDVNHKAHHTGERTSYTEVKHRRSSSNSHV
PF3D7_0113200		Plasmodium exported protein, unknown function	1.26574	-2.25268	-0.98694	-2.14695	-2.3584	-1.04986	-0.924021	PF3D7_0113200	191	S	___2	NQS(0.083)IS(0.937)S(0.98)NNNNNNNKEEEEECTK	6	KRNISISNKRNQSISSNNNNNNNKEEEEECT
PF3D7_0220300		Plasmodium exported protein, unknown function	1.26253	0.750738	2.01327	0.991461	0.510015	1.92838	2.09815	PF3D7_0220300	76	S	___1	MLDISFDSSKAS(0.973)T(0.023)T(0.004)K	12	ATVKMLDISFDSSKASTTKTRRFIHDRYSTA
PF3D7_0708400	HSP90	heat shock protein 90	1.26228	1.8762	3.13848	1.83653	1.91587	2.97384	3.30312	PF3D7_0708400	489	S	___1	S(1)GDEMIGLK	1	NRTKITELLRFQTSKSGDEMIGLKEYVDRMK
PF3D7_0702500		Plasmodium exported protein, unknown function	1.25864	2.83142	4.09006	2.86213	2.8007	3.98645	4.19366	PF3D7_0702500	164	S	___2	NS(0.458)S(0.542)QHS(1)VGSHSVSSQEHKK	6	HLSGSNSDGRNSSQHSVGSHSVSSQEHKKEH
PF3D7_1201000		Plasmodium exported protein (PHISTb), unknown function	1.25672	-1.15476	0.101966	-1.12721	-1.1823	0.0905914	0.11334	PF3D7_1201000	405	S	___1	AVPQNS(0.436)GS(0.564)NFDEFLDVK	8	SNIKNNLRAVPQNSGSNFDEFLDVKEANEIV
PF3D7_1353100		Plasmodium exported protein, unknown function	1.25093	-2.69536	-1.44443	-2.73937	-2.65135	-1.70085	-1.18801	PF3D7_1353100	121	S	___2	S(0.872)S(0.458)S(0.394)NS(0.276)HVESNTFQNK	1	HTGERTSYTEVKHRRSSSNSHVESNTFQNKE
PF3D7_0524000	KASbeta	karyopherin beta	1.2456	-0.355337	0.89026	-0.254829	-0.455845	0.82243	0.95809	PF3D7_0524000	360	S	___1	EGKDDS(1)QELYDIGEESLDR	6	CFNEWMNSIKEGKDDSQELYDIGEESLDRVG
PF3D7_0401800	PfD80	Plasmodium exported protein (PHISTb), unknown function	1.24191	-1.79905	-0.557139	-1.72343	-1.87466	-0.637749	-0.47653	PF3D7_0401800	280	T	___2	LPS(0.164)T(0.815)GS(0.021)TIRFPSTGSSR	4	PSTGSTSGSTTRLPSTGSTIRFPSTGSSRLE
PF3D7_0702500		Plasmodium exported protein, unknown function	1.24164	0.294463	1.53611	0.29565	0.293276	1.46084	1.61137	PF3D7_0702500	160	S	___2	NS(0.683)S(0.611)QHS(0.611)VGS(0.083)HS(0.011)VSSQEHKK	2	STENHLSGSNSDGRNSSQHSVGSHSVSSQEH
PF3D7_1002100	PTP5	EMP1-trafficking protein	1.23973	-1.49757	-0.257844	-1.46129	-1.53386	-0.378899	-0.136789	PF3D7_1002100	215	S	___1	SKPSQLDGNNHSET(0.001)S(0.214)S(0.785)HQGEKNNENETEK	16	SKPSQLDGNNHSETSSHQGEKNNENETEKKT
PF3D7_1002100	PTP5	EMP1-trafficking protein	1.23839	-2.64662	-1.40823	-2.55694	-2.73631	-1.26616	-1.55031	PF3D7_1002100	400	S	___1	GS(0.134)S(0.775)EGET(0.03)S(0.03)S(0.03)NKES(0.001)NESNEPTK	3	SKYTMNLDSPLLKGSSEGETSSNKESNESNE
PF3D7_1138500	PPM2	protein phosphatase PPM2	1.22516	-1.86197	-0.63681	-1.86286	-1.86107	-0.77223	-0.50139	PF3D7_1138500	10	T	___1	T(0.608)NKES(0.392)LDGGNLELDPSR	1	______MGAYLSSPKTNKESLDGGNLELDPS
PF3D7_0532400	LyMP	lysine-rich membrane-associated PHISTb protein	1.21287	5.70682	6.91969	5.76014	5.6535	6.78594	7.05344	PF3D7_0532400	310	S	___1	RKS(1)NPNNEISLR	3	VSKLPKKKKLRNRRKSNPNNEISLRTYGQST
PF3D7_0905400	RhopH3	high molecular weight rhoptry protein 3	1.20691	-0.110632	1.09628	-0.0640087	-0.157255	0.991491	1.20106	PF3D7_0905400	854	S	___1	S(0.081)S(0.919)LKLDQLDK	2	EGTSNLKKGLEFYKSSLKLDQLDKEKPKKKK
PF3D7_0702500		Plasmodium exported protein, unknown function	1.20643	-0.824812	0.381616	-0.822109	-0.827515	0.265631	0.497601	PF3D7_0702500	190	Y	___2	NY(0.731)S(0.219)LGNLS(0.05)T(0.001)GT(0.004)T(0.087)S(0.016)QGS(0.733)T(0.148)S(0.005)S(0.005)R	2	HKKEHSTHDLPAGRNYSLGNLSTGTTSQGST
PF3D7_0702500		Plasmodium exported protein, unknown function	1.20585	-1.53485	-0.328995	-1.52227	-1.54742	-0.500849	-0.157141	PF3D7_0702500	197	T	___2	NYSLGNLS(0.941)T(0.941)GT(0.083)T(0.027)S(0.008)QGSTSSR	9	HDLPAGRNYSLGNLSTGTTSQGSTSSRHYSL
PF3D7_0702500		Plasmodium exported protein, unknown function	1.19132	1.78881	2.98013	1.86764	1.70997	2.87981	3.08045	PF3D7_0702500	161	S	___2	NS(0.153)S(0.825)QHS(0.968)VGS(0.107)HS(0.918)VS(0.026)S(0.004)QEHK	3	TENHLSGSNSDGRNSSQHSVGSHSVSSQEHK
PF3D7_0702500		Plasmodium exported protein, unknown function	1.1822	3.71348	4.89569	3.69438	3.73258	4.81685	4.97452	PF3D7_0702500	222	S	___1	S(0.764)FS(0.161)GS(0.076)K	1	SRHYSLGGQPSSSGRSFSGSKYNTSNLASSS
PF3D7_0730900	PTP4	EMP1-trafficking protein	1.17181	0.0808229	1.25264	0.166321	-0.00467491	1.15304	1.35223	PF3D7_0730900	676	S	___1	KEVS(1)VPR	4	SEFKNNFDGGINKEVSVPRLSVNEFENNDDV
PF3D7_0702500		Plasmodium exported protein, unknown function	1.17083	-0.878778	0.292055	-0.973829	-0.783726	0.20801	0.376101	PF3D7_0702500	242	S	___1	YNTSNLASSSTTES(0.033)S(0.967)VSGLNTNEAHV	15	KYNTSNLASSSTTESSVSGLNTNEAHV____
PF3D7_1120100	PGM1	phosphoglycerate mutase, putative	1.16993	-1.74534	-0.575404	-1.80077	-1.68991	-0.597389	-0.553419	PF3D7_1120100	26	T	___1	FT(0.414)GWT(0.577)DVPLS(0.009)EKGEEEAIAAGK	5	HGESTWNKENKFTGWTDVPLSEKGEEEAIAA
PF3D7_0401800	PfD80	Plasmodium exported protein (PHISTb), unknown function	1.16821	1.99717	3.16538	1.97352	2.02081	3.13334	3.19742	PF3D7_0401800	138	S	___1	SAS(0.001)AAS(0.98)T(0.019)TR	6	STASAASTTRSASAASTTRSASAASTTRSAS
PF3D7_1001500	ETRAMP10	early transcribed membrane protein 10.1	1.1611	1.43277	2.59387	1.6896	1.17594	2.71072	2.47701	PF3D7_1001500	99	S	___2	SQEGS(0.985)T(0.015)PLLTAKA	5	DKKGSNDSKNKSQEGSTPLLTAKA_______
PF3D7_0424600		Plasmodium exported protein (PHISTb), unknown function	1.15616	2.15553	3.3117	2.23363	2.07743	3.22376	3.39963	PF3D7_0424600	124	T	___1	LNT(1)IGNLFEGEK	3	VIGSTFMLPNENRLNTIGNLFEGEKYNILED
PF3D7_0202000	KAHRP	knob-associated histidine-rich protein	1.15333	7.86153	9.01486	7.85863	7.86443	8.92377	9.10595	PF3D7_0202000	589	T	___1	EAS(0.002)T(0.995)T(0.003)EGATK	4	TKEASTSKGATKEASTTEGATKGASTTAGST
PF3D7_0113200		Plasmodium exported protein, unknown function	1.15315	1.82246	2.97561	1.89963	1.74529	3.01662	2.9346	PF3D7_0113200	342	S	___2	QDS(0.718)QT(0.369)S(0.908)Y(0.005)YGR	6	YTSRSNNPPRQDSQTSYYGRYTSRTNNQHRS
PF3D7_0702500		Plasmodium exported protein, unknown function	1.15241	-3.35875	-2.20634	-3.20269	-3.51482	-2.36079	-2.05189	PF3D7_0702500	236	S	___1	YNT(0.001)S(0.001)NLAS(0.004)S(0.57)S(0.363)T(0.024)T(0.037)ESSVSGLNTNEAHV	9	RSFSGSKYNTSNLASSSTTESSVSGLNTNEA
PF3D7_0702500		Plasmodium exported protein, unknown function	1.15064	-1.45061	-0.299975	-1.40308	-1.49814	-0.43198	-0.167971	PF3D7_0702500	204	S	___3	NYS(0.977)LGNLS(0.023)TGTTS(0.002)QGS(0.987)T(0.01)SSR	16	NYSLGNLSTGTTSQGSTSSRHYSLGGQPSSS
PF3D7_0702500		Plasmodium exported protein, unknown function	1.1435	-2.39623	-1.25272	-2.50263	-2.28983	-1.36038	-1.14507	PF3D7_0702500	169	S	___1	NSSQHSVGS(0.008)HS(0.992)VSSQEHK	11	NSDGRNSSQHSVGSHSVSSQEHKKEHSTHDL
PF3D7_1149000	Pf332	antigen 332, DBL-like protein	1.14279	1.07663	2.21942	1.18292	0.970335	2.20461	2.23423	PF3D7_1149000	1379	S	___1	EGS(1)INEDIVK	3	EEEELVTEEVIEREGSINEDIVKEASITEEV
PF3D7_1478600	PTP3	EMP1-trafficking protein;Plasmodium exported protein (hyp17), unknown function, pseudogene	1.14224	2.31101	3.45325	2.26022	2.3618	3.41312	3.49338	PF3D7_1478600;PF3D7_1477000	900;645	S	___1	SES(1)LKK	3	DMLNKNQKGKQLKSESLKKNELENKNTKNMD
PF3D7_0113200		Plasmodium exported protein, unknown function	1.14049	1.54913	2.68963	1.72177	1.3765	2.7651	2.61415	PF3D7_0113200	415	T	___1	NNT(1)NNNKTDNYDFNK	3	KETPKKNKKKSQRNNTNNNKTDNYDFNKHTS
PF3D7_1004400		RNA-binding protein, putative	1.13876	2.79512	3.93388	3.35829	2.23195	4.27994	3.58782	PF3D7_1004400	5	S	___1	GKYS(0.999)VS(0.001)R	4	___________MGKYSVSRKGEYSAERRYHY
PF3D7_0726100		Plasmodium exported protein, unknown function	1.13651	-0.159697	0.97681	-0.194899	-0.124495	0.955391	0.99823	PF3D7_0726100	487	S	___1	Y(0.002)S(0.99)NT(0.007)SSSIGSFSK	2	TYKHLLSNTKTRRKYSNTSSSIGSFSKSTTN
PF3D7_0702500		Plasmodium exported protein, unknown function	1.13593	-0.325072	0.810855	-0.288319	-0.361826	0.711081	0.910629	PF3D7_0702500	191	S	___3	NYS(1)LGNLSTGTTSQGSTSSR	3	KKEHSTHDLPAGRNYSLGNLSTGTTSQGSTS
PF3D7_1417800	MCM2	DNA replication licensing factor MCM2	1.13469	-1.99229	-0.857605	-1.66121	-2.32338	-0.691509	-1.0237	PF3D7_1417800	43	S	___1	QAELEGES(1)LFEEDEGFIFGADDEKK	8	GRLNEEERQAELEGESLFEEDEGFIFGADDE
PF3D7_1149000	Pf332	antigen 332, DBL-like protein	1.13368	-0.0584879	1.07519	-0.0597	-0.0572758	1.0462	1.10418	PF3D7_1149000	3087	S	___1	QGS(1)VIEEVVEEEISTTEEK	3	VQDGSGTNDFVGKQGSVIEEVVEEEISTTEE
PF3D7_0220100		DnaJ protein, putative	1.131	0.278382	1.40938	0.32856	0.228205	1.35097	1.46779	PF3D7_0220100	568	S	___1	YDS(0.234)S(0.766)DEPENSK	4	NNDVLEIMDIIRYDSSDEPENSKNIGKKKKK
PF3D7_1371800		Plasmodium exported protein, unknown function	1.128	-1.7832	-0.655205	-1.68496	-1.88144	-0.68454	-0.62587	PF3D7_1371800	38	S	___1	S(1)YVPISSTPIKPLPEYYTFEFIR	1	HHIPPSKYGHNKYSRSYVPISSTPIKPLPEY
PF3D7_0831700	HSP70x	heat shock protein 70	1.11934	2.09254	3.21189	2.19926	1.98582	3.13903	3.28474	PF3D7_0831700	110	T	___1	KFS(0.043)ET(0.812)T(0.145)VQSDMK	5	TVFDAKRLIGRKFSETTVQSDMKHWPFTVKG
PF3D7_0424500	FIKK4.1	serine/threonine protein kinase, FIKK family	1.11824	-0.141203	0.97704	-0.0137901	-0.268616	0.98991	0.96417	PF3D7_0424500	163	S	___2	S(1)LS(1)IREDCNNK	1	HKENDVSLKKDQCKKSLSIREDCNNKNSKSY
PF3D7_0424500	FIKK4.1	serine/threonine protein kinase, FIKK family	1.11824	-0.141203	0.97704	-0.0137901	-0.268616	0.98991	0.96417	PF3D7_0424500	165	S	___2	S(1)LS(1)IREDCNNK	3	ENDVSLKKDQCKKSLSIREDCNNKNSKSYNE
PF3D7_1149000	Pf332	antigen 332, DBL-like protein	1.11578	4.37629	5.49207	4.47633	4.27625	5.44964	5.53449	PF3D7_1149000	4691	S	___1	QGS(1)VTEEK	3	EVDKSVIEEAVEKQGSVTEEKVQEGVSAIEE
PF3D7_0702500		Plasmodium exported protein, unknown function	1.11173	-4.08806	-2.97633	-3.98907	-4.18705	-2.82499	-3.12767	PF3D7_0702500	180	S	___2	KEHS(0.992)T(0.008)HDLPAGR	4	VGSHSVSSQEHKKEHSTHDLPAGRNYSLGNL
PF3D7_1460700	RPL27	60S ribosomal protein L27	1.10872	0.566669	1.67539	0.655071	0.478266	1.62744	1.72334	PF3D7_1460700	95	S	___2	YQVANDFDIKS(1)LAS(1)DDVLK	11	ILPTRYQVANDFDIKSLASDDVLKSKNKKKE
PF3D7_1460700	RPL27	60S ribosomal protein L27	1.10872	0.566669	1.67539	0.655071	0.478266	1.62744	1.72334	PF3D7_1460700	98	S	___2	YQVANDFDIKS(1)LAS(1)DDVLK	14	TRYQVANDFDIKSLASDDVLKSKNKKKEVKK
PF3D7_0702500		Plasmodium exported protein, unknown function	1.10741	-3.06899	-1.96158	-3.09198	-3.04601	-2.19308	-1.73009	PF3D7_0702500	172	S	___2	NS(0.023)S(0.02)QHS(0.954)VGS(0.002)HS(0.001)VS(0.118)S(0.881)QEHK	14	GRNSSQHSVGSHSVSSQEHKKEHSTHDLPAG
PF3D7_0936800		Plasmodium exported protein (PHISTc), unknown function	1.10381	-1.60843	-0.504624	-1.51134	-1.70552	-0.67569	-0.333559	PF3D7_0936800	75	T	___1	S(0.078)HS(0.182)T(0.737)S(0.003)DPKKNEEK	4	AEASPEEHNNLRSHSTSDPKKNEEKSLSDEI
PF3D7_1133700		FHA domain-containing protein, putative	1.10379	-0.064477	1.03932	0.16711	-0.296064	1.06301	1.01562	PF3D7_1133700	820	S	___1	S(0.009)ES(0.975)KY(0.015)GR	3	SDESRIEKRREHRSESKYGRRSIRKSERSSE
PF3D7_1353100		Plasmodium exported protein, unknown function	1.1018	0.483678	1.58548	0.535681	0.431675	1.49108	1.67987	PF3D7_1353100	111	T	___1	T(0.991)S(0.009)YTEVK	1	ETEDVNHKAHHTGERTSYTEVKHRRSSSNSH
PF3D7_1106800	pTKL	protein kinase, putative	1.09721	-0.420967	0.676245	-0.461079	-0.380856	0.57774	0.77475	PF3D7_1106800	512	S	___1	S(0.146)LQNS(0.599)NGEY(0.038)Y(0.216)LINHLSK	5	KNIIKFIKNNKSLQNSNGEYYLINHLSKGIC
PF3D7_1353100		Plasmodium exported protein, unknown function	1.09524	-1.22079	-0.125549	-1.19486	-1.24672	-0.125729	-0.12537	PF3D7_1353100	129	S	___1	SSSNS(0.005)HVES(0.992)NT(0.002)FQNK	9	TEVKHRRSSSNSHVESNTFQNKEETEVNADS
PF3D7_1149000	Pf332	antigen 332, DBL-like protein	1.09477	1.93777	3.03254	1.98419	1.89134	3.08805	2.97702	PF3D7_1149000	2540	S	___1	IVEKEES(0.999)VT(0.001)EEIVRQEESTTEK	7	KEEESISEKIVEKEESVTEEIVRQEESTTEK
PF3D7_0708400	HSP90	heat shock protein 90	1.08711	-1.74059	-0.65348	-1.92647	-1.5547	-0.896269	-0.41069	PF3D7_0708400	198	S	___1	KHS(0.998)EFIS(0.002)FPIK	3	EYLEEKRIKDLVKKHSEFISFPIKLYCERQN
PF3D7_0702500		Plasmodium exported protein, unknown function	1.08573	0.235973	1.3217	0.190601	0.281345	1.21398	1.42943	PF3D7_0702500	160	S	___3	NS(0.683)S(0.611)QHS(0.611)VGS(0.083)HS(0.011)VSSQEHKK	2	STENHLSGSNSDGRNSSQHSVGSHSVSSQEH
PF3D7_1230800	WTAP	pre-mRNA-splicing regulator, putative	1.08441	0.650249	1.73466	0.611841	0.688656	1.63391	1.8354	PF3D7_1230800	312	S	___1	YGPHS(1)KYNK	5	DNNSKHEYSNKYGPHSKYNKHHSNKYDKYDQ
PF3D7_1128600	NOT2	CCR4-NOT transcription complex subunit 2, putative	1.08436	0.145408	1.22977	0.16852	0.122295	1.1052	1.35434	PF3D7_1128600	313	T	___2	TIINDDVVYDINEEHT(1)S(1)ADEKIEK	16	TIINDDVVYDINEEHTSADEKIEKLRNDDIL
PF3D7_0731100	PTP2	EMP1-trafficking protein	1.07471	2.58067	3.65539	2.58216	2.57919	3.58576	3.72501	PF3D7_0731100	496	S	___1	TSS(1)VSNSNR	3	NYRETDKKNNNLRTSSVSNSNRNENYLGASD
PF3D7_0702500		Plasmodium exported protein, unknown function	1.07261	-2.90482	-1.83221	-2.81545	-2.99419	-1.99241	-1.67201	PF3D7_0702500	196	S	___3	NYS(0.001)LGNLS(0.958)T(0.03)GT(0.011)T(0.001)S(0.009)QGS(0.839)T(0.126)S(0.02)S(0.006)R	8	THDLPAGRNYSLGNLSTGTTSQGSTSSRHYS
PF3D7_1039000	FIKK10.2	serine/threonine protein kinase, FIKK family	1.06158	-0.983122	0.078455	-0.959949	-1.00629	0.0915699	0.06534	PF3D7_1039000	354	S	___2	RFDGDQENIT(0.618)S(0.704)S(0.678)FER	11	DIKKRRFDGDQENITSSFERTQKSVKYDSDE
PF3D7_1427900		conserved protein, unknown function	1.0518	1.84943	2.90123	1.95502	1.74384	2.79298	3.00948	PF3D7_1427900	31	S	___1	DATNEHAYES(1)LNELILDGK	10	HTIDGKDATNEHAYESLNELILDGKKLTSIK
PF3D7_0113200		Plasmodium exported protein, unknown function	1.04947	-0.0656366	0.983829	0.0484314	-0.179705	0.95982	1.00784	PF3D7_0113200	191	S	___1	NQS(0.083)IS(0.937)S(0.98)NNNNNNNKEEEEECTK	6	KRNISISNKRNQSISSNNNNNNNKEEEEECT
PF3D7_0113200		Plasmodium exported protein, unknown function	1.04614	2.24353	3.28967	2.20638	2.28069	3.19821	3.38113	PF3D7_0113200	131	S	___1	NS(0.995)GLS(0.005)HMFSSEINK	2	SNVKKEEQKNKQTKNSGLSHMFSSEINKTQT
PF3D7_0702500		Plasmodium exported protein, unknown function	1.043	3.24761	4.29061	3.28663	3.20859	4.23269	4.34852	PF3D7_0702500	164	S	___1	NS(0.458)S(0.542)QHS(1)VGSHSVSSQEHKK	6	HLSGSNSDGRNSSQHSVGSHSVSSQEHKKEH
PF3D7_1149000	Pf332	antigen 332, DBL-like protein	1.04267	-3.14193	-2.09925	-3.06225	-3.22161	-2.03715	-2.16136	PF3D7_1149000	1878	S	___1	IT(0.026)ENIPVERES(0.828)VT(0.146)EDIVQEPSLAQEVEQK	11	FQEEKITENIPVERESVTEDIVQEPSLAQEV
PF3D7_1149000	Pf332	antigen 332, DBL-like protein	1.03839	1.26205	2.30044	1.37958	1.14451	2.30525	2.29562	PF3D7_1149000	1532	T	___1	DQNVFEKEGS(0.057)VT(0.943)EQLVEEEK	12	DSVKDQNVFEKEGSVTEQLVEEEKGLINEDN
PF3D7_1224300	PABP1	polyadenylate-binding protein, putative	1.03792	-1.16675	-0.128829	-1.07523	-1.25828	-0.168829	-0.088829	PF3D7_1224300	156	S	___1	SYGFVHYEDEES(1)AKEAIEK	12	GKSKSYGFVHYEDEESAKEAIEKVNGVQLGS
PF3D7_1001500	ETRAMP10	early transcribed membrane protein 10.1	1.03625	1.27559	2.31184	1.49511	1.05607	2.44292	2.18076	PF3D7_1001500	95	S	___2	NKS(1)QEGSTPLLTAK	3	DEGNDKKGSNDSKNKSQEGSTPLLTAKA___
PF3D7_0702500		Plasmodium exported protein, unknown function	1.02778	-4.00372	-2.97594	-3.91397	-4.09348	-3.08407	-2.86781	PF3D7_0702500	171	S	___3	NS(0.046)S(0.044)QHS(0.845)VGS(0.187)HS(0.466)VS(0.54)S(0.873)QEHK	13	DGRNSSQHSVGSHSVSSQEHKKEHSTHDLPA
PF3D7_0702500		Plasmodium exported protein, unknown function	1.02778	-4.00372	-2.97594	-3.91397	-4.09348	-3.08407	-2.86781	PF3D7_0702500	172	S	___3	NS(0.023)S(0.02)QHS(0.954)VGS(0.002)HS(0.001)VS(0.118)S(0.881)QEHK	14	GRNSSQHSVGSHSVSSQEHKKEHSTHDLPAG
PF3D7_1039000	FIKK10.2	serine/threonine protein kinase, FIKK family	1.02776	-0.0535564	0.974206	-0.0409985	-0.0661144	0.888231	1.06018	PF3D7_1039000	355	S	___2	RFDGDQENITS(0.019)S(0.981)FER	12	IKKRRFDGDQENITSSFERTQKSVKYDSDES
PF3D7_1246200	ACT1	actin I	1.02186	1.2977	2.31957	1.27242	1.32298	2.19292	2.44621	PF3D7_1246200	235	S	___1	LCYIALNFDEEMKTSEQS(0.146)S(0.854)DIEK	19	IALNFDEEMKTSEQSSDIEKSYELPDGNIIT
PF3D7_0113200		Plasmodium exported protein, unknown function	1.01957	2.27523	3.2948	2.35475	2.19571	3.32453	3.26507	PF3D7_0113200	341	T	___2	SNNPPRQDS(0.454)QT(0.929)S(0.506)Y(0.108)Y(0.004)GR	11	RYTSRSNNPPRQDSQTSYYGRYTSRTNNQHR
PF3D7_0401800	PfD80	Plasmodium exported protein (PHISTb), unknown function	1.00678	2.80987	3.81666	2.85867	2.76107	3.54188	4.09143	PF3D7_0401800	68	S	___1	SSSCS(0.034)S(0.966)LAS(0.971)T(0.025)T(0.004)K	9	AEDDYKKSSSCSSLASTTKRSPSTASTSTSL
PF3D7_0500800	MESA	mature parasite-infected erythrocyte surface antigen	1.00622	-1.01963	-0.0134048	-1.04769	-0.991566	-0.0580101	0.0312004	PF3D7_0500800	342	S	___1	EGNKVS(1)GPYENSENSNVTSESEETK	6	VKITEESKDREGNKVSGPYENSENSNVTSES
PF3D7_1107300	PAIP1	polyadenylate-binding protein-interacting protein 1, putative	1.00612	-0.0194321	0.986691	-0.0606289	0.0217648	0.980871	0.99251	PF3D7_1107300	2622	S	___1	KS(1)DADKLK	2	INYNNSVSSNLEWRKSDADKLKGFFDSTRVV
PF3D7_1039000	FIKK10.2	serine/threonine protein kinase, FIKK family	1.00336	0.417148	1.42051	0.439911	0.394384	1.35518	1.48584	PF3D7_1039000	353	T	___2	FDGDQENIT(0.997)S(0.141)S(0.861)FER	9	NDIKKRRFDGDQENITSSFERTQKSVKYDSD
PF3D7_1353100		Plasmodium exported protein, unknown function	0.992188	0.913938	1.90613	0.9755	0.852375	1.75949	2.05276	PF3D7_1353100	123	S	___1	S(0.091)S(0.091)S(0.817)NS(0.001)HVESNTFQNK	3	GERTSYTEVKHRRSSSNSHVESNTFQNKEET
PF3D7_0401800	PfD80	Plasmodium exported protein (PHISTb), unknown function	0.985268	5.202	6.18727	5.2977	5.10629	6.08053	6.294	PF3D7_0401800	279	S	___2	LPS(0.993)T(0.015)GS(0.971)T(0.02)IR	3	SPSTGSTSGSTTRLPSTGSTIRFPSTGSSRL
PF3D7_0708400	HSP90	heat shock protein 90	0.984938	1.12865	2.11359	1.24436	1.01294	1.85634	2.37083	PF3D7_0708400	349	S	___1	HFS(1)VEGQLEFK	3	SLTNDWEDHLAVKHFSVEGQLEFKALLFIPK
PF3D7_0501300	SBP1	skeleton-binding protein 1	0.984118	-1.30977	-0.325655	-1.32251	-1.29704	-0.317579	-0.333731	PF3D7_0501300	325	T	___2	TQQNPQQNAQQNTQQNT(0.001)QQQS(0.444)T(0.538)T(0.509)KS(0.171)T(0.169)T(0.168)K	22	QNAQQNTQQNTQQQSTTKSTTKTVARET___
PF3D7_0501300	SBP1	skeleton-binding protein 1	0.984118	-1.30977	-0.325655	-1.32251	-1.29704	-0.317579	-0.333731	PF3D7_0501300	326	T	___2	TQQNPQQNAQQNTQQNT(0.001)QQQS(0.444)T(0.538)T(0.509)KS(0.171)T(0.169)T(0.168)K	23	NAQQNTQQNTQQQSTTKSTTKTVARET____
PF3D7_1149000	Pf332	antigen 332, DBL-like protein	0.983432	0.290443	1.27388	0.284231	0.296656	1.25519	1.29256	PF3D7_1149000	2176	S	___1	LINEVGETES(0.996)VT(0.003)EEIVQK	10	VVEEEKLINEVGETESVTEEIVQKEVSDAEE
PF3D7_0408300	ZRANB2	zinc finger Ran-binding domain-containing protein 2, putative	0.979468	0.580623	1.56009	0.80291	0.358335	1.62563	1.49455	PF3D7_0408300	201	S	___1	S(0.623)S(0.377)KYDDKYDR	1	EHIPDRGIEIKKYDRSSKYDDKYDRSSKYDD
PF3D7_0311100		pre-mRNA splicing factor, putative	0.978667	-0.170192	0.808475	0.0507412	-0.391125	1.07631	0.54064	PF3D7_0311100	222	S	___1	KT(0.073)S(0.927)IER	3	KSDSYKKRPFNKRKTSIERSLSNKRYDEKTN
PF3D7_0113200		Plasmodium exported protein, unknown function	0.972147	1.34105	2.3132	1.40401	1.27809	2.29574	2.33065	PF3D7_0113200	339	S	___1	QDS(0.988)QT(0.01)S(0.002)YYGR	3	YSRYTSRSNNPPRQDSQTSYYGRYTSRTNNQ
PF3D7_0113200		Plasmodium exported protein, unknown function	0.970893	0.940058	1.91095	0.972391	0.907724	1.78272	2.03918	PF3D7_0113200	393	S	___2	HES(1)LHSYNIK	3	VVYNDKIRKSNNRHESLHSYNIKETPKKNKK
PF3D7_0113200		Plasmodium exported protein, unknown function	0.970893	0.940058	1.91095	0.972391	0.907724	1.78272	2.03918	PF3D7_0113200	396	S	___2	HES(1)LHS(0.998)Y(0.001)NIKET(0.001)PK	6	NDKIRKSNNRHESLHSYNIKETPKKNKKKSQ
PF3D7_0702500		Plasmodium exported protein, unknown function	0.970262	-2.98288	-2.01262	-3.09827	-2.86749	-1.98023	-2.045	PF3D7_0702500	167	S	___1	NS(0.534)S(0.491)QHS(0.957)VGS(0.854)HS(0.145)VS(0.016)S(0.004)QEHK	9	GSNSDGRNSSQHSVGSHSVSSQEHKKEHSTH
PF3D7_1128600	NOT2	CCR4-NOT transcription complex subunit 2, putative	0.969398	0.679288	1.64869	0.668701	0.689875	1.53927	1.7581	PF3D7_1128600	314	S	___2	TIINDDVVYDINEEHT(1)S(1)ADEKIEK	17	IINDDVVYDINEEHTSADEKIEKLRNDDILK
PF3D7_1246200	ACT1	actin I	0.968758	-1.59683	-0.62807	-2.00519	-1.18847	-0.718399	-0.537741	PF3D7_1246200	15	S	___1	GEEDVQALVVDNGS(1)GNVK	14	_MGEEDVQALVVDNGSGNVKAGVAGDDAPRS
PF3D7_0401800	PfD80	Plasmodium exported protein (PHISTb), unknown function	0.964313	-3.3557	-2.39138	-3.29572	-3.41568	-2.41346	-2.36931	PF3D7_0401800	446	T	___1	LIDLEDGFT(0.996)DT(0.004)QYIR	9	DVELNKKLIDLEDGFTDTQYIRKLYSLINEN
PF3D7_0919800		TLD domain-containing protein	0.963818	-5.20236	-4.23854	-5.76462	-4.64009	-4.16422	-4.31286	PF3D7_0919800	943	S	___1	S(0.117)NS(0.117)S(0.117)DIHS(0.65)NNNNNK	8	ENTLNDHKSNSSDIHSNNNNNKNNYDNNNNY
PF3D7_1238100		calcyclin binding protein, putative	0.963758	-2.35416	-1.3904	-2.53877	-2.16956	-1.49655	-1.28426	PF3D7_1238100	149	S	___1	KDS(0.998)VHVT(0.002)LVK	3	DKIIPNKCSFKVKKDSVHVTLVKQENKHWEN
PF3D7_0517400	FACT-L	FACT complex subunit SPT16, putative	0.963408	-2.29161	-1.3282	-2.47444	-2.10877	-1.20691	-1.44949	PF3D7_0517400	2	S	___1	S(1)EALDIDNAK	1	______________MSEALDIDNAKAKIGLV
PF3D7_0801000		Plasmodium exported protein (PHISTc), unknown function	0.962478	6.57863	7.54111	6.53848	6.61877	7.41552	7.66669	PF3D7_0801000	158	S	___1	KGS(1)LGFDSFK	3	NDQNSRNNTPNLRKGSLGFDSFKKLELGTLN
PF3D7_1140700		conserved Plasmodium protein, unknown function	0.957298	-2.08843	-1.13113	-1.95314	-2.22371	-1.08468	-1.17758	PF3D7_1140700	1107	Y	___1	LTES(0.004)EY(0.967)DS(0.025)VY(0.003)ET(0.001)LINR	6	NNIRKSYINKLTESEYDSVYETLINRYCKNT
PF3D7_1136500.2-p1		casein kinase 1	0.954786	-2.17915	-1.22437	-2.15443	-2.20387	-1.18499	-1.26374	PF3D7_1136500.2-p1;PF3D7_1136500	19;19	S	___1	KLGS(0.118)GS(0.882)FGDIYVAK	6	RVANKYALGKKLGSGSFGDIYVAKDIVTMEE
PF3D7_1016700		Plasmodium exported protein (PHISTc), unknown function	0.947312	-1.35871	-0.4114	-1.29261	-1.42481	-0.40263	-0.42017	PF3D7_1016700	521	S	___1	IDLVDS(0.199)S(0.199)DEEFENRY(0.028)NS(0.525)NS(0.021)S(0.023)T(0.005)QK	17	DLVDSSDEEFENRYNSNSSTQKKKKKRSKVP
PF3D7_0501300	SBP1	skeleton-binding protein 1	0.946592	-1.37049	-0.423895	-1.44135	-1.29963	-0.471689	-0.376101	PF3D7_0501300	328	S	___2	TQQNPQQNAQQNTQQNTQQQS(0.019)T(0.013)T(0.103)KS(0.851)T(0.013)T(0.002)K	25	QQNTQQNTQQQSTTKSTTKTVARET______
PF3D7_1478600	PTP3	EMP1-trafficking protein	0.945582	-0.714562	0.23102	-0.675129	-0.753996	0.12801	0.33403	PF3D7_1478600	216	S	___1	IDNLS(1)NKPTDLRR	5	ESGLYGPMKGKIDNLSNKPTDLRRTNNTDYG
PF3D7_1362700		conserved Plasmodium protein, unknown function	0.945217	-1.33867	-0.393455	-1.24118	-1.43616	-0.31963	-0.467279	PF3D7_1362700	702	S	___1	NSLINSNIDDCT(0.001)EPYS(0.999)DVNKT(0.001)YQYK	16	NSLINSNIDDCTEPYSDVNKTYQYKNESIKN
PF3D7_0702500		Plasmodium exported protein, unknown function	0.944999	4.74086	5.68586	4.7976	4.68411	5.48503	5.88668	PF3D7_0702500	211	S	___1	HYS(1)LGGQPSSSGR	3	STGTTSQGSTSSRHYSLGGQPSSSGRSFSGS
PF3D7_0922500	PGK	phosphoglycerate kinase	0.940207	-1.71584	-0.775635	-1.65706	-1.77463	-0.89724	-0.65403	PF3D7_0922500	319	S	___1	S(0.998)IENY(0.002)KDVILT(0.001)SK	1	EGIPDNWMGLDAGPKSIENYKDVILTSKTVI
PF3D7_0220100		DnaJ protein, putative	0.938793	2.44752	3.38632	2.57188	2.32316	3.28629	3.48634	PF3D7_0220100	567	S	___1	YDS(0.994)S(0.006)DEPENSK	3	KNNDVLEIMDIIRYDSSDEPENSKNIGKKKK
PF3D7_0307200		60S ribosomal protein L7, putative	0.937102	0.069088	1.00619	0.0516415	0.0865345	0.9352	1.07718	PF3D7_0307200	66	S	___1	YEEEYES(1)ERKK	7	NDLRQRTLRYEEEYESERKKIIELKREARKN
PF3D7_0818900	HSP70	heat shock protein 70	0.936913	2.49395	3.43086	2.70938	2.27851	3.44152	3.4202	PF3D7_0818900	554	S	___1	NS(1)LENYCYGVK	2	KAEDEENRKRIEARNSLENYCYGVKSSLEDQ
PF3D7_0936800		Plasmodium exported protein (PHISTc), unknown function	0.934477	4.08095	5.01542	4.1282	4.0337	4.86944	5.16141	PF3D7_0936800	318	S	___1	VQPPKS(1)QQQK	6	VQPPKVQQQKVQPPKSQQQKVQPPKSQQQKV
PF3D7_0936800		Plasmodium exported protein (PHISTc), unknown function	0.931598	0.341892	1.27349	0.412251	0.271534	1.07604	1.47094	PF3D7_0936800	74	S	___1	SHS(0.985)T(0.014)SDPKKNEEK	3	LAEASPEEHNNLRSHSTSDPKKNEEKSLSDE
PF3D7_0702500		Plasmodium exported protein, unknown function	0.931458	0.227728	1.15919	0.18741	0.268045	1.18723	1.13114	PF3D7_0702500	197	T	___3	NYSLGNLS(0.941)T(0.941)GT(0.083)T(0.027)S(0.008)QGSTSSR	9	HDLPAGRNYSLGNLSTGTTSQGSTSSRHYSL
PF3D7_1466900		rhoptry protein, putative	0.931433	-1.48107	-0.54964	-1.40523	-1.55692	-0.675619	-0.42366	PF3D7_1466900	442	S	___1	QEEEYKS(1)LLDELENENNEWKEK	7	KEEQEIYIKQEEEYKSLLDELENENNEWKEK
PF3D7_1149000	Pf332	antigen 332, DBL-like protein	0.931173	0.363092	1.29427	0.24576	0.480425	1.14623	1.4423	PF3D7_1149000	132	S	___1	GIKDET(0.114)FS(0.886)RENGLDVCK	8	TMLNEIEKGIKDETFSRENGLDVCKSQCEER
PF3D7_1107300	PAIP1	polyadenylate-binding protein-interacting protein 1, putative	0.930233	-0.469638	0.460595	-0.6553	-0.283976	0.598061	0.32313	PF3D7_1107300	1308	S	___1	RGS(1)NIK	3	LNNNKYHQNHSDRRGSNIKNAESNTNKMNEK
PF3D7_0401800	PfD80	Plasmodium exported protein (PHISTb), unknown function	0.928807	5.11099	6.0398	5.21233	5.00965	5.9387	6.1409	PF3D7_0401800	288	S	___2	FPS(0.996)T(0.204)GS(0.785)S(0.015)RLEDYEK	3	STTRLPSTGSTIRFPSTGSSRLEDYEKEGSN
PF3D7_1357100		elongation factor 1-alpha	0.926443	-2.36366	-1.43722	-2.47628	-2.25105	-1.57276	-1.30168	PF3D7_1357100;PF3D7_1357000	192;192	S	___1	VGYQADKVDFIPIS(1)GFEGDNLIEK	14	KKVGYQADKVDFIPISGFEGDNLIEKSDKTP
PF3D7_1460700	RPL27	60S ribosomal protein L27	0.925162	1.06888	1.99405	1.11513	1.02263	1.96893	2.01916	PF3D7_1460700	98	S	___1	YQVANDFDIKS(1)LAS(1)DDVLK	14	TRYQVANDFDIKSLASDDVLKSKNKKKEVKK
PF3D7_1478600	PTP3	EMP1-trafficking protein	0.923058	1.55378	2.47684	1.4914	1.61616	2.3664	2.58727	PF3D7_1478600	680	S	___1	SIPNKLDS(1)QNGK	8	GKNEKNEKSIPNKLDSQNGKNEKNEKSIPNK
PF3D7_1201100		RESA-like protein with PHIST and DnaJ domains	0.920444	-0.517258	0.403186	-0.45715	-0.577366	0.198792	0.60758	PF3D7_1201100	464	S	___1	YVFDYGSFEEKS(0.15)ES(0.85)EKSLDISK	14	SKYVFDYGSFEEKSESEKSLDISKNFIFSEE
PF3D7_1002100	PTP5	EMP1-trafficking protein	0.916908	-4.40085	-3.48394	-4.40556	-4.39614	-3.66539	-3.30249	PF3D7_1002100	165	S	___1	TDITNEQGTSADNNTTENNVSTSQVDEQPEAS(0.747)T(0.189)S(0.064)GVER	32	ENNVSTSQVDEQPEASTSGVERMKERSNLFA
PF3D7_0708400	HSP90	heat shock protein 90	0.916042	1.02077	1.93681	1.00658	1.03495	1.75997	2.11365	PF3D7_0708400	421	S	___1	GVVDSEDLPLNIS(0.039)RES(0.961)LQQNK	16	GVVDSEDLPLNISRESLQQNKILKVIKKNLI
PF3D7_0113200		Plasmodium exported protein, unknown function	0.915873	3.73905	4.65492	3.77103	3.70707	4.64594	4.6639	PF3D7_0113200	393	S	___1	HES(1)LHSYNIK	3	VVYNDKIRKSNNRHESLHSYNIKETPKKNKK
PF3D7_1149000	Pf332	antigen 332, DBL-like protein	0.915812	1.1328	2.04862	1.1837	1.08191	2.08069	2.01654	PF3D7_1149000	1530	S	___1	EGS(1)VTEQLVEEEK	3	EEDSVKDQNVFEKEGSVTEQLVEEEKGLINE
PF3D7_1001500	ETRAMP10	early transcribed membrane protein 10.1	0.911742	2.85472	3.76647	3.00241	2.70704	3.88122	3.65171	PF3D7_1001500	95	S	___1	NKS(1)QEGSTPLLTAK	3	DEGNDKKGSNDSKNKSQEGSTPLLTAKA___
PF3D7_1027300	nPrx	peroxiredoxin	0.910247	0.110768	1.02102	-0.197948	0.419485	1.11644	0.925591	PF3D7_1027300	323	S	___1	S(0.686)GKGS(0.306)VS(0.007)S(0.001)SNK	1	NKNQNLKDLKKKNVKSGKGSVSSSNKKLPKG
PF3D7_0202000	KAHRP	erythrocyte membrane protein 1, PfEMP1;knob-associated histidine-rich protein	0.907488	2.78662	3.69411	2.63374	2.9395	3.84306	3.54516	PF3D7_0202000;PF3D7_1255200	550;1774	S	___1	EAS(0.262)T(0.88)S(0.85)KEAT(0.008)K	5	AAEGATKGATKEASTSKEATKEASTSKEATK
PF3D7_1401200		Plasmodium exported protein, unknown function	0.906282	-0.191332	0.714951	-0.22683	-0.155834	0.68568	0.744221	PF3D7_1401200	59	S	___1	INS(0.999)KY(0.001)DELR	3	HIRSLAESYKQYKINSKYDELRTLGASSPQK
PF3D7_1224300	PABP1	polyadenylate-binding protein, putative	0.904511	0.214314	1.11882	0.210611	0.218016	1.10108	1.13657	PF3D7_1224300	56	S	___1	S(1)LGYAYVNYHNLADAER	1	HVSSIRVCRDSVTRKSLGYAYVNYHNLADAE
PF3D7_0730900	PTP4	EMP1-trafficking protein	0.896702	3.25753	4.15423	3.41511	3.09995	3.98448	4.32398	PF3D7_0730900	1167	T	___1	HLT(1)DEENKVEK	3	ETKKDIPQNKNYKHLTDEENKVEKEMSIHDG
PF3D7_0401800	PfD80	Plasmodium exported protein (PHISTb), unknown function	0.895898	1.89909	2.79498	1.84569	1.95248	2.70882	2.88115	PF3D7_0401800	279	S	___3	LPS(0.993)T(0.015)GS(0.971)T(0.02)IR	3	SPSTGSTSGSTTRLPSTGSTIRFPSTGSSRL
PF3D7_0831700	HSP70x	heat shock protein 70	0.895192	0.809573	1.70477	0.792921	0.826225	1.63713	1.7724	PF3D7_0831700	296	T	___1	LRT(1)QCEK	3	GKDVSKNSKSLRRLRTQCEKAKRVLSSSAQA
PF3D7_1435600		conserved Plasmodium protein, unknown function;zinc finger protein, putative	0.893842	-2.38592	-1.49207	-2.45079	-2.32104	-1.49701	-1.48714	PF3D7_1435600;PF3D7_1019300	1711;329	S	___1	S(1)LNVHK	1	IKHSRQVSSSVNSSKSLNVHKGYETNKNEKK
PF3D7_0501400	FIRA	interspersed repeat antigen	0.891598	-3.24651	-2.35491	-3.1836	-3.30941	-2.47986	-2.22996	PF3D7_0501400	1192	S	___2	AS(0.043)EGDNHS(0.546)LS(0.622)S(0.748)LS(0.038)EET(0.004)EEK	10	HDDEKKASEGDNHSLSSLSEETEEKSHTKKK
PF3D7_0501400	FIRA	interspersed repeat antigen	0.891598	-3.24651	-2.35491	-3.1836	-3.30941	-2.47986	-2.22996	PF3D7_0501400	1193	S	___2	AS(0.043)EGDNHS(0.546)LS(0.622)S(0.748)LS(0.038)EET(0.004)EEK	11	DDEKKASEGDNHSLSSLSEETEEKSHTKKKK
PF3D7_0726100		Plasmodium exported protein, unknown function	0.891247	-1.37648	-0.485235	-1.32299	-1.42998	-0.54224	-0.42823	PF3D7_0726100	489	T	___1	YS(0.013)NT(0.761)S(0.222)S(0.002)S(0.001)IGSFSK	4	KHLLSNTKTRRKYSNTSSSIGSFSKSTTNIS
PF3D7_0818200	14-3-3I	14-3-3 protein	0.891212	0.587092	1.4783	0.53459	0.639595	1.33297	1.62364	PF3D7_0818200	148	S	___1	YISEFS(1)CDEGK	6	YYKMKGDYYRYISEFSCDEGKKEASNCAQEA
PF3D7_0202000	KAHRP	knob-associated histidine-rich protein	0.887842	6.1382	7.02605	6.14506	6.13135	6.9674	7.08469	PF3D7_0202000	598	S	___1	GAS(0.991)T(0.009)TAGSTTGATTGANAVQSK	3	ATKEASTTEGATKGASTTAGSTTGATTGANA
PF3D7_0113200		Plasmodium exported protein, unknown function	0.887218	2.45566	3.34288	2.57499	2.33633	3.49985	3.18591	PF3D7_0113200	180	S	___1	NIS(1)ISNKR	3	QTNKSKNNKKDKRNISISNKRNQSISSNNNN
PF3D7_1149000	Pf332	antigen 332, DBL-like protein	0.882878	-2.74287	-1.85999	-2.86975	-2.61598	-1.96973	-1.75025	PF3D7_1149000	4847	S	___1	STTQEILEET(0.022)QS(0.955)VNEEIVEEERDT(0.022)DEVLKEK	12	EEEKSTTQEILEETQSVNEEIVEEERDTDEV
PF3D7_1140700		conserved Plasmodium protein, unknown function	0.882447	-0.881217	0.00123024	-0.872509	-0.889925	-0.10117	0.10363	PF3D7_1140700	1615	S	___1	SEQDHINDDDNNINS(0.962)Y(0.038)DDES(1)DVNFNNKK	20	HINDDDNNINSYDDESDVNFNNKKNDYKGKR
PF3D7_0309500	AS	asparagine synthetase [glutamine-hydrolyzing], putative	0.881903	-0.541912	0.339991	-0.896299	-0.187525	0.609921	0.0700607	PF3D7_0309500	591	S	___1	SVLGIHRHS(1)K	9	NADQSGRSVLGIHRHSKQFDDVKCIPLQNQE
PF3D7_0702500		Plasmodium exported protein, unknown function	0.878848	-0.714792	0.164056	-0.784069	-0.645515	0.0687714	0.25934	PF3D7_0702500	242	S	___2	YNTSNLASSSTTES(0.033)S(0.967)VSGLNTNEAHV	15	KYNTSNLASSSTTESSVSGLNTNEAHV____
PF3D7_0401800	PfD80	Plasmodium exported protein (PHISTb), unknown function	0.878613	0.313353	1.19197	0.245371	0.381334	1.1052	1.27873	PF3D7_0401800	171	S	___3	S(0.001)AS(0.999)T(0.001)AS(0.979)T(0.02)AS(0.001)AASAASTTR	3	STTRSASTASTARSASTASTASAASAASTTR
PF3D7_0301700		Plasmodium exported protein, unknown function	0.877083	-1.03777	-0.160685	-1.03514	-1.0404	-0.203449	-0.11792	PF3D7_0301700	149	T	___1	VTVLEPQT(1)ENS(1)EDEENYEK	8	EYYNSTPRVTVLEPQTENSEDEENYEKTIVD
PF3D7_0702500		Plasmodium exported protein, unknown function	0.875522	-3.56922	-2.6937	-3.69767	-3.44077	-2.99455	-2.39285	PF3D7_0702500	211	S	___3	HYS(1)LGGQPSSSGR	3	STGTTSQGSTSSRHYSLGGQPSSSGRSFSGS
PF3D7_0401800	PfD80	Plasmodium exported protein (PHISTb), unknown function	0.873618	-1.7563	-0.882685	-1.69792	-1.81469	-1.08078	-0.684589	PF3D7_0401800	169	S	___2	S(0.915)AS(0.064)T(0.019)AS(0.002)T(0.001)ASAASAAS(0.85)T(0.146)T(0.004)R	1	AASTTRSASTASTARSASTASTASAASAAST
PF3D7_1478600	PTP3	EMP1-trafficking protein;Plasmodium exported protein (hyp17), unknown function, pseudogene	0.872957	3.42192	4.29488	3.53636	3.30749	4.27928	4.31048	PF3D7_1478600;PF3D7_1477000	1171;922	S	___1	CGIDVES(1)DIDIETETNPLK	7	KVKDIVSKKCGIDVESDIDIETETNPLKWHQ
PF3D7_0424700	FIKK4.2	serine/threonine protein kinase, FIKK family	0.869498	0.541323	1.41082	0.621601	0.461044	1.31679	1.50485	PF3D7_0424700	139	S	___2	RNS(1)LY(1)K	3	EEIRKYLSDKTKKRNSLYKYKLKGSKGKSVK
PF3D7_0424700	FIKK4.2	serine/threonine protein kinase, FIKK family	0.869498	0.541323	1.41082	0.621601	0.461044	1.31679	1.50485	PF3D7_0424700	141	Y	___2	RNS(1)LY(1)K	5	IRKYLSDKTKKRNSLYKYKLKGSKGKSVKNI
PF3D7_1149000	Pf332	antigen 332, DBL-like protein	0.863578	0.716963	1.58054	0.752331	0.681595	1.55611	1.60497	PF3D7_1149000	209	S	___1	KDEYDIQS(1)R	8	FKDWLETKKDEYDIQSRVFEKKYANDNKSKH
PF3D7_1149000	Pf332	antigen 332, DBL-like protein	0.862898	1.47498	2.33788	1.61459	1.33537	2.28945	2.3863	PF3D7_1149000	1918	S	___1	IIPEVS(0.998)VT(0.002)ENVVEK	6	IEETKLANEKIIPEVSVTENVVEKEGLDTEE
PF3D7_1121100		conserved Plasmodium protein, unknown function	0.858972	-0.793647	0.0653248	-0.888988	-0.698305	0.0549202	0.0757294	PF3D7_1121100	1516	S	___1	RLS(1)FIESK	3	NDTISTVLDNLTKRLSFIESKIKEKDFGLDI
PF3D7_0702500		Plasmodium exported protein, unknown function	0.858962	4.07632	4.93528	4.06249	4.09015	4.86669	5.00387	PF3D7_0702500	217	S	___1	HYSLGGQPS(0.95)S(0.049)S(0.001)GR	9	QGSTSSRHYSLGGQPSSSGRSFSGSKYNTSN
PF3D7_0113200		Plasmodium exported protein, unknown function	0.858833	-2.79589	-1.93706	-2.89899	-2.69279	-1.91369	-1.96043	PF3D7_0113200	341	T	___1	SNNPPRQDS(0.454)QT(0.929)S(0.506)Y(0.108)Y(0.004)GR	11	RYTSRSNNPPRQDSQTSYYGRYTSRTNNQHR
PF3D7_0831700	HSP70x	heat shock protein 70	0.858753	3.36542	4.22417	3.46924	3.26159	4.19764	4.2507	PF3D7_0831700	108	S	___1	KFS(0.998)ET(0.001)T(0.001)VQSDMK	3	ENTVFDAKRLIGRKFSETTVQSDMKHWPFTV
PF3D7_0401800	PfD80	Plasmodium exported protein (PHISTb), unknown function	0.858256	0.221398	1.07965	0.169611	0.273186	1.01087	1.14844	PF3D7_0401800	289	T	___2	LPS(0.877)T(0.122)GSTIRFPS(0.227)T(0.757)GS(0.014)S(0.002)R	13	TTRLPSTGSTIRFPSTGSSRLEDYEKEGSNV
PF3D7_0401800	PfD80	Plasmodium exported protein (PHISTb), unknown function	0.856607	1.80597	2.66258	1.86138	1.75056	2.48801	2.83714	PF3D7_0401800	183	S	___2	SASTASTASAASAAS(0.962)T(0.036)T(0.001)R	15	RSASTASTASAASAASTTRSASAASTTRSAS
PF3D7_1303400	LisH	LisH domain-containing protein, putative	0.856412	-2.9442	-2.08779	-2.8993	-2.98911	-1.94754	-2.22804	PF3D7_1303400	532	S	___1	RNS(1)KVESK	3	KKSVKGINKKDKKRNSKVESKKEQAFVKSVA
PF3D7_1246200	ACT1	actin I	0.850562	-2.35344	-1.50288	-2.52438	-2.1825	-1.68841	-1.31734	PF3D7_1246200	34	S	___1	SVFPS(1)IVGRPK	5	KAGVAGDDAPRSVFPSIVGRPKNPGIMVGME
PF3D7_0702400	SEMP1	small exported membrane protein 1	0.845843	-5.79694	-4.95109	-6.71559	-4.87829	-4.53923	-5.36296	PF3D7_0702400	33	S	___1	NPSQS(0.999)GPYRHHGPQGR	5	NTQEKKFNPTRNPSQSGPYRHHGPQGRTPYM
PF3D7_0702500		Plasmodium exported protein, unknown function	0.845348	-3.17626	-2.33091	-3.30187	-3.05064	-2.42839	-2.23343	PF3D7_0702500	237	S	___2	YNTSNLASS(0.006)S(0.991)T(0.002)TESSVSGLNTNEAHV	10	SFSGSKYNTSNLASSSTTESSVSGLNTNEAH
PF3D7_1246200	ACT1	actin I	0.843113	-2.33272	-1.48961	-2.28295	-2.3825	-1.65083	-1.32839	PF3D7_1246200	266	S	___1	CPEALFQPS(1)FLGK	9	VGNERFRCPEALFQPSFLGKEAAGIHTTTFN
PF3D7_1410400	RAP1	rhoptry-associated protein 1	0.842272	3.85396	4.69623	3.91163	3.7963	4.62306	4.76941	PF3D7_1410400	104	S	___1	S(1)ASAAAILEEDDSK	1	SNKSSKKGHGRSRVRSASAAAILEEDDSKDD
PF3D7_0202000	KAHRP	knob-associated histidine-rich protein	0.840668	0.713862	1.55453	0.70134	0.726385	1.67235	1.43671	PF3D7_0202000	590	T	___1	EAS(0.773)T(0.231)T(0.996)EGATK	5	KEASTSKGATKEASTTEGATKGASTTAGSTT
PF3D7_0702500		Plasmodium exported protein, unknown function	0.840177	-1.31247	-0.472295	-1.42831	-1.19663	-0.550779	-0.39381	PF3D7_0702500	167	S	___3	NS(0.534)S(0.491)QHS(0.957)VGS(0.854)HS(0.145)VS(0.016)S(0.004)QEHK	9	GSNSDGRNSSQHSVGSHSVSSQEHKKEHSTH
PF3D7_1442900	ARFGEF	protein transport protein SEC7, putative	0.839149	-0.590578	0.24857	-0.52305	-0.658106	0.141571	0.35557	PF3D7_1442900	3296	S	___1	DSTQEKEDNIKDS(0.87)T(0.13)QDIEDNVEDLIEEK	13	NIKDSTQEKEDNIKDSTQDIEDNVEDLIEEK
PF3D7_0500800	MESA	mature parasite-infected erythrocyte surface antigen	0.838772	-2.39893	-1.56015	-2.52449	-2.27337	-1.7002	-1.42011	PF3D7_0500800	348	S	___3	VS(0.001)GPY(0.004)ENS(0.931)ENS(0.851)NVT(0.172)S(0.04)ES(0.002)EETKK	8	SKDREGNKVSGPYENSENSNVTSESEETKKL
PF3D7_0500800	MESA	mature parasite-infected erythrocyte surface antigen	0.838772	-2.39893	-1.56015	-2.52449	-2.27337	-1.7002	-1.42011	PF3D7_0500800	351	S	___3	VSGPY(0.002)ENS(0.894)ENS(0.887)NVT(0.492)S(0.517)ES(0.105)EET(0.104)KK	11	REGNKVSGPYENSENSNVTSESEETKKLAEK
PF3D7_0500800	MESA	mature parasite-infected erythrocyte surface antigen	0.838772	-2.39893	-1.56015	-2.52449	-2.27337	-1.7002	-1.42011	PF3D7_0500800	355	S	___3	VSGPYENSENSNVT(0.001)S(0.999)ESEETK	15	KVSGPYENSENSNVTSESEETKKLAEKEENE
PF3D7_1401200		Plasmodium exported protein, unknown function	0.835423	0.771423	1.60685	0.785131	0.757715	1.58162	1.63207	PF3D7_1401200	135	S	___1	KMPS(1)KYDYLR	4	DLRRFGVPTQKKKMPSKYDYLRTLKEQNVNN
PF3D7_0826700	RACK1	receptor for activated c kinase	0.834097	0.812213	1.64631	0.877541	0.746885	1.5772	1.71542	PF3D7_0826700	214	S	___1	NLEGHTGVLNTVTIS(0.003)PDGS(0.985)LCAS(0.012)GGK	19	GHTGVLNTVTISPDGSLCASGGKDGVAKLWD
PF3D7_0113200		Plasmodium exported protein, unknown function	0.833648	-0.664767	0.16888	-0.507549	-0.821985	0.224831	0.11293	PF3D7_0113200	190	S	___1	NQS(0.002)IS(0.977)S(0.021)NNNNNNNKEEEEECTK	5	DKRNISISNKRNQSISSNNNNNNNKEEEEEC
PF3D7_0201900	EMP3	erythrocyte membrane protein 3	0.833162	2.19547	3.02864	2.23773	2.15322	2.95387	3.1034	PF3D7_0201900	1360	S	___1	NTPS(1)EGQQNTGLK	4	TPNERQQNTGLKNTPSEGQQNTGLKNTPSEG
PF3D7_1149000	Pf332	antigen 332, DBL-like protein	0.832967	-4.34655	-3.51358	-4.28015	-4.41294	-3.67298	-3.35418	PF3D7_1149000	5212	S	___1	S(0.979)IT(0.015)EEVS(0.006)VEEDIITDK	1	DVEEGSVAENVKETKSITEEVSVEEDIITDK
PF3D7_1442900	ARFGEF	protein transport protein SEC7, putative	0.832313	-1.00076	-0.168445	-1.31136	-0.690155	-0.12232	-0.214569	PF3D7_1442900	1117	S	___1	NS(0.5)S(0.5)NIHK	2	DEKISANDQKKNNKNSSNIHKNISDDHSVLN
PF3D7_1149000	Pf332	antigen 332, DBL-like protein	0.828892	-0.902807	-0.0739155	-0.965969	-0.839645	-0.19087	0.0430393	PF3D7_1149000	407	S	___1	NIDVNGS(1)KDEYSPETESANSK	7	IPRGDNVPRNIDVNGSKDEYSPETESANSKI
PF3D7_1436300	PTEX150	translocon component PTEX150	0.827868	1.15968	1.98755	1.33502	0.984344	1.92575	2.04935	PF3D7_1436300	817	S	___1	KNS(1)EYDLYDDDDKEGGNFK	3	IYDTKENLIKFLKKNSEYDLYDDDDKEGGNF
PF3D7_1224300	PABP1	polyadenylate-binding protein, putative	0.822923	-2.08912	-1.26619	-1.78526	-2.39297	-1.2678	-1.26459	PF3D7_1224300	533	S	___1	EQRLS(1)R	5	KPLYVGLAEKREQRLSRLQQRFRMHPIRHHM
PF3D7_0301600	GEXP21	Plasmodium exported protein (hyp1), unknown function	0.819292	-2.37484	-1.55554	-2.47742	-2.27225	-1.43669	-1.6744	PF3D7_0301600	620	S	___2	SYENEFNLSTDRRNS(0.999)ES(0.001)SSR	15	RSYENEFNLSTDRRNSESSSRIHVDDENYKR
PF3D7_0301600	GEXP21	Plasmodium exported protein (hyp1), unknown function	0.819292	-2.37484	-1.55554	-2.47742	-2.27225	-1.43669	-1.6744	PF3D7_0301600	622	S	___2	SYENEFNLST(0.001)DRRNS(0.993)ES(0.51)S(0.427)S(0.068)R	17	YENEFNLSTDRRNSESSSRIHVDDENYKRLK
PF3D7_0517300	SR1	serine/arginine-rich splicing factor 1	0.816737	-0.0336914	0.783046	-0.0765686	0.00918579	0.669111	0.89698	PF3D7_0517300	207	S	___2	S(0.354)Y(0.037)S(0.607)S(0.003)RS(0.992)Y(0.003)S(0.003)R	3	DDGGYGRYNSRHRSYSSRSYSRSGKRSYTRS
PF3D7_0517300	SR1	serine/arginine-rich splicing factor 1	0.816737	-0.0336914	0.783046	-0.0765686	0.00918579	0.669111	0.89698	PF3D7_0517300	210	S	___2	S(0.354)Y(0.037)S(0.607)S(0.003)RS(0.992)Y(0.003)S(0.003)R	6	GYGRYNSRHRSYSSRSYSRSGKRSYTRSRSR
PF3D7_1371500		probable protein, unknown function	0.816407	-1.5812	-0.764795	-1.65317	-1.50924	-0.84322	-0.686371	PF3D7_1371500	43	T	___1	NIAVNLIPLQT(0.976)LT(0.024)K	11	NKYSKNIAVNLIPLQTLTKMYKYNSQNEDII
PF3D7_1149000	Pf332	antigen 332, DBL-like protein	0.815382	-2.57091	-1.75553	-2.6119	-2.52992	-1.84943	-1.66163	PF3D7_1149000	1065	S	___1	ELPVKEESVFEELT(0.001)EEDQS(0.969)VT(0.03)K	19	VKEESVFEELTEEDQSVTKEIPVEEHSVFKE
PF3D7_1478600	PTP3	EMP1-trafficking protein	0.810382	-0.316916	0.493465	-0.397429	-0.236404	0.537201	0.44973	PF3D7_1478600	402	S	___1	NPFIDNDLS(0.001)DKKS(0.999)NMQDNNK	13	EGKNPFIDNDLSDKKSNMQDNNKGLKVTTNK
PF3D7_1007700	AP2-I	AP2 domain transcription factor, putative	0.808872	1.12232	1.93119	1.31487	0.929766	1.95537	1.90701	PF3D7_1007700	735	S	___1	KLS(1)EES(1)QMLLDDMEQTLCR	3	KGVKRGRGRPPKRKLSEESQMLLDDMEQTLC
PF3D7_1353100		Plasmodium exported protein, unknown function	0.807287	5.08519	5.89248	5.06115	5.10924	5.78938	5.99558	PF3D7_1353100	273	S	___1	RYGS(0.989)GS(0.011)HDHEEEVVEA	4	DNKSKKKPKDNKRYGSGSHDHEEEVVEA___
PF3D7_1036900		conserved Plasmodium protein, unknown function	0.806263	2.12335	2.92961	2.15904	2.08765	2.91845	2.94077	PF3D7_1036900	539	T	___2	LNYDMT(0.098)T(0.902)IT(1)EETNEFDHDVNKK	7	EYDPYTGQKLNYDMTTITEETNEFDHDVNKK
PF3D7_0202000	KAHRP	erythrocyte membrane protein 1, PfEMP1;knob-associated histidine-rich protein	0.805403	9.21176	10.0172	9.17218	9.25134	10.1711	9.86327	PF3D7_0202000;PF3D7_1255200	549;1773	T	___1	GAT(1)KEAS(0.055)T(0.891)S(0.055)K	8	CAAEGATKGATKEASTSKEATKEASTSKEAT
PF3D7_0202000	KAHRP	knob-associated histidine-rich protein	0.804812	-0.277512	0.527301	-0.377789	-0.177235	0.300421	0.754181	PF3D7_0202000	343	Y	___1	Y(0.953)S(0.609)S(0.422)FS(0.013)S(0.002)VNKYGK	1	SAPYGVPHGAAHGSRYSSFSSVNKYGKHGDE
PF3D7_1307800		fork head domain protein, putative	0.804273	1.60709	2.41136	1.8402	1.37398	2.5125	2.31022	PF3D7_1307800	296	S	___1	ILVDKYS(0.906)S(0.094)DVENDK	7	ARKKSKSSKILVDKYSSDVENDKKGVEEKYK
PF3D7_0113200		Plasmodium exported protein, unknown function	0.802612	2.08376	2.88638	2.13333	2.03419	2.8707	2.90205	PF3D7_0113200	299	S	___1	QDS(1)QTNHYGR	3	ENKNKNKIINYPRQDSQTNHYGRYTSRTNNQ
PF3D7_1442900	ARFGEF	protein transport protein SEC7, putative	0.801547	-0.193597	0.60795	-0.495529	0.108335	0.67882	0.537081	PF3D7_1442900	1118	S	___1	NS(0.109)S(0.891)NIHK	3	EKISANDQKKNNKNSSNIHKNISDDHSVLNN
PF3D7_0610900	SPT5	transcription elongation factor SPT5, putative	0.800222	1.14161	1.94184	1.29845	0.984776	2.0003	1.88337	PF3D7_0610900	1121	S	___1	DS(0.5)S(0.5)NNIKHEEHK	3	DYLKKKHSINNFRDSSNNIKHEEHKNYVTHI
PF3D7_0315100	eIF4E	eukaryotic translation initiation factor 4E	0.800183	-1.58414	-0.783955	-1.56377	-1.60451	-0.83149	-0.73642	PF3D7_0315100	223	S	___1	SLS(1)HIHR	3	RIDGSTIFPPRVKSLSHIHR___________
PF3D7_1107300	PAIP1	polyadenylate-binding protein-interacting protein 1, putative	0.797687	1.99918	2.79687	1.9583	2.04007	2.79177	2.80197	PF3D7_1107300	1449	S	___1	RNS(1)NFINEK	3	GSNNEKNQNVEDRRNSNFINEKINTQDNKTS
PF3D7_0500800	MESA	mature parasite-infected erythrocyte surface antigen	0.795403	-3.43324	-2.63783	-3.45993	-3.40654	-2.76445	-2.51122	PF3D7_0500800	354	T	___3	VS(0.002)GPY(0.006)ENS(0.64)ENS(0.713)NVT(0.713)S(0.704)ES(0.175)EET(0.047)KK	14	NKVSGPYENSENSNVTSESEETKKLAEKEEN
PF3D7_0202000	KAHRP	knob-associated histidine-rich protein	0.794913	-2.92713	-2.13221	-2.85949	-2.99477	-2.06656	-2.19787	PF3D7_0202000	599	T	___1	GAS(0.967)T(0.972)T(0.06)AGS(0.974)T(0.021)T(0.004)GATTGANAVQSK	4	TKEASTTEGATKGASTTAGSTTGATTGANAV
PF3D7_0831000	GEXP09	Plasmodium exported protein (PHISTb), unknown function	0.792268	-1.13758	-0.345314	-1.08961	-1.18555	-0.349369	-0.341259	PF3D7_0831000	125	S	___1	S(0.014)LNGEY(0.022)S(0.941)DNPLFDY(0.023)K	7	NKWYEENKRSLNGEYSDNPLFDYKLFKYHDI
PF3D7_1149000	Pf332	antigen 332, DBL-like protein	0.789513	-1.4072	-0.61769	-1.27104	-1.54337	-0.67697	-0.558411	PF3D7_1149000	4734	S	___1	QGS(0.953)VT(0.047)EEIVEEEELDTEEVLEDK	3	EEDKSVIEEAVEKQGSVTEEIVEEEELDTEE
PF3D7_0730900	PTP4	EMP1-trafficking protein	0.788078	0.655592	1.44367	0.75659	0.554594	1.29432	1.59302	PF3D7_0730900	978	S	___1	NNDDVS(1)LNKESYPR	6	VPRLSVSEFKNNDDVSLNKESYPRRKFVSEL
PF3D7_0401800	PfD80	Plasmodium exported protein (PHISTb), unknown function	0.787813	3.46446	4.25227	3.47238	3.45654	4.18195	4.32259	PF3D7_0401800	288	S	___1	FPS(0.996)T(0.204)GS(0.785)S(0.015)RLEDYEK	3	STTRLPSTGSTIRFPSTGSSRLEDYEKEGSN
PF3D7_1206700	EIF5	eukaryotic translation initiation factor 5, putative	0.787051	0.0838337	0.870885	0.289412	-0.121744	1.01432	0.727449	PF3D7_1206700	204	S	___3	NGVIY(0.607)S(0.395)DDEENDDS(0.998)DDLLDS(0.996)DKS(0.869)IS(0.134)NGKK	23	DEENDDSDDLLDSDKSISNGKKENKKNKKKD
PF3D7_1206700	EIF5	eukaryotic translation initiation factor 5, putative	0.787051	0.0838337	0.870885	0.289412	-0.121744	1.01432	0.727449	PF3D7_1206700	186	Y	___3	NGVIY(0.607)S(0.395)DDEENDDS(0.998)DDLLDS(0.996)DKS(0.869)IS(0.134)NGKK	5	EKTDKNEDNNRNGVIYSDDEENDDSDDLLDS
PF3D7_0209800	UAP56	ATP-dependent RNA helicase UAP56	0.786497	0.742423	1.52892	0.746801	0.738045	1.48508	1.57276	PF3D7_0209800	240	S	___1	LDMRS(1)DVQK	5	VLDECDKCLEKLDMRSDVQKIFISTPLKKQV
PF3D7_0113200		Plasmodium exported protein, unknown function	0.785788	1.61004	2.39583	1.63908	1.58101	2.40115	2.39051	PF3D7_0113200	339	S	___2	QDS(0.988)QT(0.01)S(0.002)YYGR	3	YSRYTSRSNNPPRQDSQTSYYGRYTSRTNNQ
PF3D7_0702500		Plasmodium exported protein, unknown function	0.785742	4.79168	5.57742	4.90647	4.67689	5.60424	5.5506	PF3D7_0702500	224	S	___1	SFS(0.998)GS(0.002)K	3	HYSLGGQPSSSGRSFSGSKYNTSNLASSSTT
PF3D7_1302100	G27/25	gamete antigen 27/25	0.783288	0.187452	0.97074	0.0706806	0.304224	0.928991	1.01249	PF3D7_1302100	8	S	___1	VQKDS(1)AKPLDK	5	________MSKVQKDSAKPLDKFGNIYDYHY
PF3D7_1149000	Pf332	antigen 332, DBL-like protein	0.783273	-1.17846	-0.395185	-1.09512	-1.2618	-0.436909	-0.35346	PF3D7_1149000	757	S	___1	S(0.999)VS(0.001)EEIPVEEK	1	FKGQLINEEKPVEEKSVSEEIPVEEKSVSEE
PF3D7_0401800	PfD80	Plasmodium exported protein (PHISTb), unknown function	0.781117	-0.367072	0.414045	-0.213839	-0.520306	0.185511	0.64258	PF3D7_0401800	180	S	___2	SAS(0.002)T(0.002)AS(0.994)T(0.901)AS(0.101)AAS(1)AASTTR	12	STARSASTASTASAASAASTTRSASAASTTR
PF3D7_0401800	PfD80	Plasmodium exported protein (PHISTb), unknown function	0.779542	0.821223	1.60077	0.831121	0.811325	1.55147	1.65006	PF3D7_0401800	80	S	___1	SPST(0.001)AS(0.02)T(0.108)S(0.833)T(0.038)SLR	8	SLASTTKRSPSTASTSTSLRSASTASTASTL
PF3D7_1036900		conserved Plasmodium protein, unknown function	0.778978	-1.12126	-0.342279	-1.07279	-1.16973	-0.408939	-0.27562	PF3D7_1036900	538	T	___2	LNY(0.011)DMT(0.783)T(0.735)IT(0.735)EET(0.735)NEFDHDVNK	6	LEYDPYTGQKLNYDMTTITEETNEFDHDVNK
PF3D7_1353100		Plasmodium exported protein, unknown function	0.777099	1.06861	1.84571	1.19298	0.944244	1.77315	1.91827	PF3D7_1353100	121	S	___1	S(0.872)S(0.458)S(0.394)NS(0.276)HVESNTFQNK	1	HTGERTSYTEVKHRRSSSNSHVESNTFQNKE
PF3D7_0401800	PfD80	Plasmodium exported protein (PHISTb), unknown function	0.775188	2.23037	3.00556	2.19539	2.26535	2.92369	3.08743	PF3D7_0401800	288	S	___3	FPS(0.996)T(0.204)GS(0.785)S(0.015)RLEDYEK	3	STTRLPSTGSTIRFPSTGSSRLEDYEKEGSN
PF3D7_0220600		Plasmodium exported protein (hyp9), unknown function	0.775152	1.84993	2.62508	1.87523	1.82463	2.54298	2.70719	PF3D7_0220600	99	S	___1	MVEVDSES(1)VCPGTNEVNLK	8	GNMHPEIKMVEVDSESVCPGTNEVNLKVVTN
PF3D7_1466800		conserved Plasmodium protein, unknown function	0.774627	2.14694	2.92157	2.10724	2.18665	2.89835	2.94479	PF3D7_1466800	203	S	___1	NQES(1)HDEYNEEAVKK	4	HEDENVKYMNEKNQESHDEYNEEAVKKNFRY
PF3D7_0318200	RPB1	DNA-directed RNA polymerase II subunit RPB1	0.774472	2.398	3.17247	2.54661	2.24939	3.19366	3.15128	PF3D7_0318200	2161	S	___2	LGGKFS(0.999)PT(0.01)QS(0.991)PK	6	KDINNLDTLKLGGKFSPTQSPKSPTSVMHSP
PF3D7_0419900		phosphatidylinositol 4-kinase, putative	0.773842	-1.48272	-0.708879	-1.44902	-1.51642	-0.569429	-0.84833	PF3D7_0419900	1797	S	___3	ENILY(1)S(1)LY(1)LLIDK	6	IYYIEGLRKKENILYSLYLLIDKNVYRDKYL
PF3D7_0419900		phosphatidylinositol 4-kinase, putative	0.773842	-1.48272	-0.708879	-1.44902	-1.51642	-0.569429	-0.84833	PF3D7_0419900	1796	Y	___3	ENILY(1)S(1)LY(1)LLIDK	5	IIYYIEGLRKKENILYSLYLLIDKNVYRDKY
PF3D7_0419900		phosphatidylinositol 4-kinase, putative	0.773842	-1.48272	-0.708879	-1.44902	-1.51642	-0.569429	-0.84833	PF3D7_0419900	1799	Y	___3	ENILY(1)S(1)LY(1)LLIDK	8	YIEGLRKKENILYSLYLLIDKNVYRDKYLHK
PF3D7_0601900		conserved Plasmodium protein, unknown function	0.772449	2.31833	3.09078	2.33936	2.2973	2.78336	3.3982	PF3D7_0601900	118	S	___1	SHS(0.003)S(0.006)S(0.037)S(0.917)S(0.037)VYASANAEN	6	TSSSSRQAARSHSSSSSVYASANAEN_____
PF3D7_1149100.2-p1		Plasmodium exported protein, unknown function	0.772053	-0.999542	-0.227489	-0.8759	-1.12318	-0.32724	-0.127739	PF3D7_1149100.2-p1;PF3D7_1149100	186;187	T	___1	TETQEESLNKEVVEGCS(0.5)T(0.5)GMCPLK	18	TQEESLNKEVVEGCSTGMCPLKNNDTKKENC
PF3D7_0501400	FIRA	interspersed repeat antigen	0.771558	3.53686	4.30842	3.69145	3.38227	4.26673	4.3501	PF3D7_0501400	1333	S	___1	KAS(1)LGSVK	3	SWLSFGRKDKKDKKASLGSVKETYEKETQTE
PF3D7_0520000	RPS9	40S ribosomal protein S9, putative	0.771258	-3.3685	-2.59724	-3.24026	-3.49675	-2.72262	-2.47187	PF3D7_0520000	67	S	___1	YLLT(0.001)LDEKS(0.378)S(0.621)KR	10	IRSAARYLLTLDEKSSKRIFQGEALLRRMVR
PF3D7_0532300		Plasmodium exported protein (PHISTb), unknown function	0.770278	3.57255	4.34283	3.63356	3.51154	4.24335	4.4423	PF3D7_0532300	347	Y	___1	NYSTHENT(0.001)Y(0.999)PTLK	9	KNGKFLKNYSTHENTYPTLKTLLEKYAITDD
PF3D7_0102200	RESA	ring-infected erythrocyte surface antigen	0.770277	2.65322	3.4235	2.69723	2.60921	3.2933	3.55369	PF3D7_0102200	382	S	___1	AS(0.998)IT(0.002)NSAINYYDTVK	2	QQVNEYGDILPSLRASITNSAINYYDTVKDG
PF3D7_1120100	PGM1	phosphoglycerate mutase, putative	0.765841	1.9467	2.71254	2.00347	1.88993	2.86422	2.56086	PF3D7_1120100	94	S	___1	HYGS(1)LQGLNK	4	VPVVKTWRLNERHYGSLQGLNKSETAKKYGE
PF3D7_1330800		RNA-binding protein, putative	0.761662	2.68048	3.44214	2.73569	2.62527	3.50137	3.38291	PF3D7_1330800	26	S	___1	ADDS(1)NVDNK	4	SKDKKEELKDIKADDSNVDNKATESTAVDSE
PF3D7_0301700		Plasmodium exported protein, unknown function	0.761373	3.69347	4.45484	3.79148	3.59546	4.4203	4.48938	PF3D7_0301700	152	S	___1	VTVLEPQTENS(1)EDEENYEK	11	NSTPRVTVLEPQTENSEDEENYEKTIVDELN
PF3D7_1464600	UIS2	serine/threonine protein phosphatase UIS2, putative	0.759647	-3.21997	-2.46032	-3.16402	-3.27592	-2.42383	-2.49681	PF3D7_1464600	633	T	___1	DLGT(0.011)NT(0.989)LSAESIANFYNDK	6	KKKSEKQVHKDLGTNTLSAESIANFYNDKIK
PF3D7_0611400	SWIB	SWIB/MDM2 domain-containing protein	0.758012	-1.93259	-1.17458	-1.83052	-2.03466	-1.17338	-1.17578	PF3D7_0611400	455	S	___2	ENLDNNS(0.994)EDIS(0.987)LS(0.019)NIK	7	ETEKDIMQKENLDNNSEDISLSNIKESNNLT
PF3D7_0611400	SWIB	SWIB/MDM2 domain-containing protein	0.758012	-1.93259	-1.17458	-1.83052	-2.03466	-1.17338	-1.17578	PF3D7_0611400	459	S	___2	ENLDNNS(0.994)EDIS(0.987)LS(0.019)NIK	11	DIMQKENLDNNSEDISLSNIKESNNLTDVEN
PF3D7_0401800	PfD80	Plasmodium exported protein (PHISTb), unknown function	0.757812	-0.340022	0.41779	-0.32391	-0.356134	0.281401	0.55418	PF3D7_0401800	327	S	___1	EAESVDDNNKEGNES(0.999)DNIY(0.001)CMLCSSNTR	15	KEAESVDDNNKEGNESDNIYCMLCSSNTRGF
PF3D7_1466900		rhoptry protein, putative	0.757283	-1.38481	-0.627524	-1.33589	-1.43373	-0.678829	-0.57622	PF3D7_1466900	246	S	___2	S(0.509)S(0.509)Y(0.474)S(0.509)EVNDEFNINNEEHHNK	1	DEQNNENVPMCLISKSSYSEVNDEFNINNEE
PF3D7_1466900		rhoptry protein, putative	0.757283	-1.38481	-0.627524	-1.33589	-1.43373	-0.678829	-0.57622	PF3D7_1466900	247	S	___2	S(0.509)S(0.509)Y(0.474)S(0.509)EVNDEFNINNEEHHNK	2	EQNNENVPMCLISKSSYSEVNDEFNINNEEH
PF3D7_1466900		rhoptry protein, putative	0.757283	-1.38481	-0.627524	-1.33589	-1.43373	-0.678829	-0.57622	PF3D7_1466900	249	S	___2	S(0.002)S(0.002)YS(0.996)EVNDEFNINNEEHHNK	4	NNENVPMCLISKSSYSEVNDEFNINNEEHHN
PF3D7_0501400	FIRA	interspersed repeat antigen	0.757233	-2.35808	-1.60084	-2.36706	-2.34909	-1.77387	-1.42782	PF3D7_0501400	1190	S	___2	AS(0.002)EGDNHS(0.997)LS(0.001)SLSEETEEK	8	QEHDDEKKASEGDNHSLSSLSEETEEKSHTK
PF3D7_1001000	PfJ13	Plasmodium exported protein (hyp12), unknown function	0.753774	1.75632	2.5101	1.90325	1.60939	2.37931	2.64088	PF3D7_1001000	87	S	___1	S(0.976)LKGT(0.024)ELDVTSYNK	1	NNKNEDNHELQSKSRSLKGTELDVTSYNKSK
PF3D7_0922100		ubiquitin-like protein, putative	0.753258	-1.93628	-1.18302	-1.9755	-1.89705	-1.1742	-1.19184	PF3D7_0922100	791	S	___1	RNS(1)AIR	3	ANMRSIQMTSNNRRNSAIRRSHMKCLNDVND
PF3D7_0303100		conserved Plasmodium protein, unknown function	0.753193	1.41537	2.16856	1.48893	1.3418	2.21188	2.12524	PF3D7_0303100	400	S	___1	TLNNYYLLNDVET(0.015)KS(0.985)DTYINETISK	15	KTLNNYYLLNDVETKSDTYINETISKDVNYH
PF3D7_0318200	RPB1	DNA-directed RNA polymerase II subunit RPB1	0.751416	2.50324	3.25466	2.65062	2.35587	3.27397	3.23535	PF3D7_0318200	2165	S	___2	LGGKFS(0.999)PT(0.01)QS(0.991)PK	10	NLDTLKLGGKFSPTQSPKSPTSVMHSPFSPF
PF3D7_1478600	PTP3	EMP1-trafficking protein;Plasmodium exported protein (hyp17), unknown function, pseudogene	0.749023	-0.809143	-0.0601196	-0.88257	-0.735716	-0.15045	0.0302105	PF3D7_1478600;PF3D7_1477000	1008;753	S	___1	LFTSDIMNNY(0.001)GNIKS(0.999)GLK	15	KLFTSDIMNNYGNIKSGLKHNTNKIAKTVLK
PF3D7_1203700	NAPL	nucleosome assembly protein	0.748497	0.0369377	0.785435	0.10252	-0.0286446	0.60758	0.963289	PF3D7_1203700	33	T	___1	IDDDKMT(0.999)DLT(0.001)EEQKETLK	7	ISSLLESIKIDDDKMTDLTEEQKETLKKLKL
PF3D7_1133700		FHA domain-containing protein, putative	0.747098	-3.28765	-2.54055	-3.20511	-3.3702	-2.54883	-2.53228	PF3D7_1133700	542	S	___2	DT(0.012)NNS(0.985)IES(0.992)IILT(0.01)K	5	AERYDTELTTKDTNNSIESIILTKGKGADKR
PF3D7_1133700		FHA domain-containing protein, putative	0.747098	-3.28765	-2.54055	-3.20511	-3.3702	-2.54883	-2.53228	PF3D7_1133700	545	S	___2	DT(0.012)NNS(0.985)IES(0.992)IILT(0.01)K	8	YDTELTTKDTNNSIESIILTKGKGADKRSKY
PF3D7_0424500	FIKK4.1	serine/threonine protein kinase, FIKK family	0.746737	2.74809	3.49483	2.78897	2.7072	3.49843	3.49122	PF3D7_0424500	525	T	___1	INDPYDYLKS(0.5)IT(0.5)NQEER	12	EKLKINDPYDYLKSITNQEERKSFYFNVSNA
PF3D7_1001500	ETRAMP10	early transcribed membrane protein 10.1	0.746627	0.0649586	0.811585	0.198751	-0.0688343	0.891531	0.73164	PF3D7_1001500	100	T	___2	NKS(0.948)QEGS(0.185)T(0.84)PLLT(0.027)AKA	8	KKGSNDSKNKSQEGSTPLLTAKA________
PF3D7_1362700		conserved Plasmodium protein, unknown function	0.745613	1.9266	2.67221	2.00539	1.84781	2.59792	2.7465	PF3D7_1362700	1816	S	___1	EYDKT(0.5)S(0.5)DCDKNNTPLK	6	TQIKNEFNSKEYDKTSDCDKNNTPLKNGCNQ
PF3D7_1362700		conserved Plasmodium protein, unknown function	0.745613	1.9266	2.67221	2.00539	1.84781	2.59792	2.7465	PF3D7_1362700	1815	T	___1	EYDKT(0.5)S(0.5)DCDKNNTPLK	5	TTQIKNEFNSKEYDKTSDCDKNNTPLKNGCN
PF3D7_1002400.2-p1		RNA-binding protein, putative	0.744222	0.269458	1.01368	0.323421	0.215494	0.94887	1.07849	PF3D7_1002400.2-p1;PF3D7_1002400	71;71	S	___1	NFGFVTFNNS(1)EDAENAMNK	10	ITKESRNFGFVTFNNSEDAENAMNKANKMEI
PF3D7_0610900	SPT5	transcription elongation factor SPT5, putative	0.744198	1.45598	2.20018	1.60979	1.30216	2.26141	2.13894	PF3D7_0610900	1120	S	___1	DS(0.814)S(0.186)NNIKHEEHK	2	DDYLKKKHSINNFRDSSNNIKHEEHKNYVTH
PF3D7_0215300	ACS8	acyl-CoA synthetase	0.744108	-0.164997	0.579111	-0.10397	-0.226025	0.511171	0.647051	PF3D7_0215300	859	S	___1	NT(0.396)LKS(0.602)T(0.007)DAS(0.995)LKIPEK	9	MSNITLKNTLKSTDASLKIPEKNKVQTNKSR
PF3D7_0702500		Plasmodium exported protein, unknown function	0.742012	-1.31962	-0.577605	-1.43257	-1.20667	-0.69779	-0.45742	PF3D7_0702500	224	S	___2	SFS(0.998)GS(0.002)K	3	HYSLGGQPSSSGRSFSGSKYNTSNLASSSTT
PF3D7_0824400	NT2	nucleoside transporter 2	0.741858	-0.971787	-0.229929	-0.70664	-1.23693	0.0173512	-0.477209	PF3D7_0824400	292	S	___1	S(0.964)QNIS(0.036)YPININSIIYESK	1	RDDSYKYYESITEKKSQNISYPININSIIYE
PF3D7_1206700	EIF5	eukaryotic translation initiation factor 5, putative	0.738169	0.179762	0.917931	0.36809	-0.0085659	1.05704	0.77882	PF3D7_1206700	195	S	___3	NGVIY(0.014)S(0.986)DDEENDDS(1)DDLLDSDKSISNGK	14	NRNGVIYSDDEENDDSDDLLDSDKSISNGKK
PF3D7_1206700	EIF5	eukaryotic translation initiation factor 5, putative	0.738169	0.179762	0.917931	0.36809	-0.0085659	1.05704	0.77882	PF3D7_1206700	201	S	___3	NGVIY(0.607)S(0.395)DDEENDDS(0.998)DDLLDS(0.996)DKS(0.869)IS(0.134)NGKK	20	YSDDEENDDSDDLLDSDKSISNGKKENKKNK
PF3D7_1365800		conserved Plasmodium protein, unknown function	0.737759	-0.858148	-0.120389	-0.671249	-1.04505	-0.0353489	-0.205429	PF3D7_1365800	13	S	___1	KS(0.551)S(0.445)ES(0.004)LKEDDEFFLER	2	___MKAFVNKIQFRKSSESLKEDDEFFLERK
PF3D7_0702500		Plasmodium exported protein, unknown function	0.737412	2.67609	3.4135	2.71386	2.63832	3.35039	3.47661	PF3D7_0702500	191	S	___1	NYS(1)LGNLSTGTTSQGSTSSR	3	KKEHSTHDLPAGRNYSLGNLSTGTTSQGSTS
PF3D7_0601900		conserved Plasmodium protein, unknown function	0.736712	-0.0606527	0.67606	-0.0354099	-0.0858955	0.42453	0.927589	PF3D7_0601900	118	S	___2	SHS(0.003)S(0.006)S(0.037)S(0.917)S(0.037)VYASANAEN	6	TSSSSRQAARSHSSSSSVYASANAEN_____
PF3D7_1343300		conserved Plasmodium protein, unknown function	0.736153	-1.5263	-0.790145	-1.37369	-1.67891	-1.01692	-0.56337	PF3D7_1343300	439	S	___1	SDPCDLDS(1)IDYEVNPVLK	8	KVNSSSEKSDPCDLDSIDYEVNPVLKTDIKK
PF3D7_1445700		conserved Plasmodium protein, unknown function	0.735158	-0.487368	0.24779	-0.587749	-0.386986	0.477711	0.0178699	PF3D7_1445700	306	S	___1	SYRS(1)FKK	4	GGRVDRLPGFRRSYRSFKKVDEGNWNNKYEK
PF3D7_0401800	PfD80	Plasmodium exported protein (PHISTb), unknown function	0.733686	3.32559	4.05928	3.3865	3.26468	3.90774	4.21082	PF3D7_0401800	64	S	___1	S(0.288)S(0.341)S(0.407)CS(0.97)S(0.958)LAS(0.028)T(0.006)T(0.001)K	5	SEEKAEDDYKKSSSCSSLASTTKRSPSTAST
PF3D7_0702500		Plasmodium exported protein, unknown function	0.733238	-0.168347	0.564891	-0.169079	-0.167616	0.420671	0.70911	PF3D7_0702500	151	S	___2	NNSDGST(0.001)ENHLS(0.972)GS(0.011)NS(0.016)DGR	12	QLYKNNSDGSTENHLSGSNSDGRNSSQHSVG
PF3D7_0702500		Plasmodium exported protein, unknown function	0.733238	-0.168347	0.564891	-0.169079	-0.167616	0.420671	0.70911	PF3D7_0702500	153	S	___2	NNSDGSTENHLS(0.971)GS(0.597)NS(0.432)DGR	14	YKNNSDGSTENHLSGSNSDGRNSSQHSVGSH
PF3D7_0401800	PfD80	Plasmodium exported protein (PHISTb), unknown function	0.732422	2.85962	3.59204	2.9679	2.75134	3.50645	3.67763	PF3D7_0401800	279	S	___1	LPS(0.993)T(0.015)GS(0.971)T(0.02)IR	3	SPSTGSTSGSTTRLPSTGSTIRFPSTGSSRL
PF3D7_1358800	RPS15	40S ribosomal protein S15	0.731586	0.614768	1.34635	0.58724	0.642296	1.25301	1.4397	PF3D7_1358800	31	S	___1	QKPS(1)EIEDAIIK	4	LPYKRKQPSWLKQKPSEIEDAIIKLAKKGQT
PF3D7_0923900	PABP2	RNA-binding protein, putative	0.730273	1.6745	2.40477	1.67299	1.676	2.27711	2.53243	PF3D7_0923900	36	S	___1	VQVDDINNIDKEFS(1)DLQK	14	FKVQVDDINNIDKEFSDLQKLKMMNEGAEIQ
PF3D7_1110900		ES2 protein, putative	0.730112	0.104463	0.834575	0.170511	0.038414	0.79616	0.87299	PF3D7_1110900	239	Y	___1	YFEEDENYSLVNY(1)VHSDQEYIK	13	LLKYFEEDENYSLVNYVHSDQEYIKEKKKKK
PF3D7_0113200		Plasmodium exported protein, unknown function	0.728152	0.028923	0.757075	0.115831	-0.0579853	0.838781	0.675369	PF3D7_0113200	188	S	___1	NQS(1)IS(0.531)S(0.469)NNNNNNNKEEEEECTK	3	KKDKRNISISNKRNQSISSNNNNNNNKEEEE
PF3D7_0702500		Plasmodium exported protein, unknown function	0.726643	2.40775	3.1344	2.48783	2.32767	3.0017	3.26709	PF3D7_0702500	155	S	___1	NNSDGSTENHLSGS(0.004)NS(0.995)DGR	16	NNSDGSTENHLSGSNSDGRNSSQHSVGSHSV
PF3D7_1123400	ERF3	translation elongation factor EF-1, subunit alpha, putative	0.724442	1.22115	1.94559	1.39843	1.04387	1.86702	2.02416	PF3D7_1123400	66	S	___1	IKEEEDINGS(1)EIVEDENVNDIEEK	10	NNDLDKIKEEEDINGSEIVEDENVNDIEEKI
PF3D7_0220300		Plasmodium exported protein, unknown function	0.724242	1.53094	2.25518	1.55411	1.50776	2.14475	2.36561	PF3D7_0220300	90	T	___1	Y(0.001)S(0.009)T(0.989)APYELIK	3	ASTTKTRRFIHDRYSTAPYELIKRKPKKKKS
PF3D7_0935900	REX1	ring-exported protein 1	0.723457	-0.0536118	0.669846	-0.172989	0.0657654	0.602821	0.73687	PF3D7_0935900	593	S	___1	KESEAPKGS(0.095)S(0.867)T(0.019)S(0.019)DK	10	KDALAKKESEAPKGSSTSDKNTTENQLNAEA
PF3D7_0812500		RNA-binding protein, putative	0.722793	1.37902	2.10181	1.46103	1.297	2.19519	2.00843	PF3D7_0812500	727	S	___1	YS(1)NYNTYNNNDNYNNK	2	KHDLYDKEYYNKRKYSNYNTYNNNDNYNNKD
PF3D7_0113000	GARP	glutamic acid-rich protein	0.722718	-2.7407	-2.01798	-2.66801	-2.8134	-2.22784	-1.80813	PF3D7_0113000	226	S	___1	EQGGCGIIS(0.57)S(0.43)VHETSNDTK	9	SSPYQYREQGGCGIISSVHETSNDTKDNDKE
PF3D7_1478600	PTP3	EMP1-trafficking protein;Plasmodium exported protein (hyp17), unknown function, pseudogene	0.722223	-0.938723	-0.216499	-0.94673	-0.930716	-0.27636	-0.156639	PF3D7_1478600;PF3D7_1477000	1171;922	S	___2	CGIDVES(1)DIDIETETNPLK	7	KVKDIVSKKCGIDVESDIDIETETNPLKWHQ
PF3D7_1478600	PTP3	EMP1-trafficking protein;Plasmodium exported protein (hyp17), unknown function, pseudogene	0.722223	-0.938723	-0.216499	-0.94673	-0.930716	-0.27636	-0.156639	PF3D7_1478600;PF3D7_1477000	1177;928	T	___2	KCGIDVES(1)DIDIET(0.998)ET(0.002)NPLK	14	SKKCGIDVESDIDIETETNPLKWHQVVRNKY
PF3D7_1338300	EF-1gamma	elongation factor 1-gamma, putative	0.720907	-0.0556221	0.665285	-0.0585785	-0.0526657	0.59968	0.73089	PF3D7_1338300	252	T	___1	KT(1)NPLDLLPPSNFSLDEWK	2	DLLSDDLAEKKQPKKTNPLDLLPPSNFSLDE
PF3D7_1307800		fork head domain protein, putative	0.720473	-2.21834	-1.49787	-1.95315	-2.48354	-1.36563	-1.63011	PF3D7_1307800	242	S	___3	S(0.92)S(0.088)EHT(0.409)RT(0.304)S(0.262)KDNS(0.012)Y(0.002)YDSK	1	DKYDKQMDKIYILKKSSEHTRTSKDNSYYDS
PF3D7_0914900		BSD-domain protein, putative	0.720304	-2.29831	-1.578	-2.16425	-2.43237	-1.57801	-1.578	PF3D7_0914900	556	S	___3	FLDEIS(1)EANRS(1)ACDLEEPK	6	FQKISEYNTKFLDEISEANRSACDLEEPKSD
PF3D7_0914900		BSD-domain protein, putative	0.720304	-2.29831	-1.578	-2.16425	-2.43237	-1.57801	-1.578	PF3D7_0914900	561	S	___3	FLDEIS(1)EANRS(1)ACDLEEPK	11	EYNTKFLDEISEANRSACDLEEPKSDFFDSS
PF3D7_0914900		BSD-domain protein, putative	0.720304	-2.29831	-1.578	-2.16425	-2.43237	-1.57801	-1.578	PF3D7_0914900	570	S	___3	SACDLEEPKS(1)DFFDSSNIK	10	ISEANRSACDLEEPKSDFFDSSNIKKELNEM
PF3D7_1429600	GEXP03	conserved Plasmodium protein, unknown function	0.719413	0.129212	0.848625	0.17256	0.085865	0.94648	0.750771	PF3D7_1429600	190	S	___2	S(1)AAS(1)EECVHFK	1	KNYNDMSTNNDGTPRSAASEECVHFKEKSYL
PF3D7_1429600	GEXP03	conserved Plasmodium protein, unknown function	0.719413	0.129212	0.848625	0.17256	0.085865	0.94648	0.750771	PF3D7_1429600	193	S	___2	S(1)AAS(1)EECVHFK	4	NDMSTNNDGTPRSAASEECVHFKEKSYLLDK
PF3D7_1033200	ETRAMP10.2	early transcribed membrane protein 10.2	0.718922	1.34176	2.06068	1.31627	1.36724	2.03315	2.08821	PF3D7_1033200	312	S	___1	RIS(0.017)T(0.017)S(0.966)R	5	PNPNTHGPPSRRISTSRSSGSSNRSSSGTST
PF3D7_1445700		conserved Plasmodium protein, unknown function	0.718382	-2.07555	-1.35717	-2.34879	-1.80231	-1.3647	-1.34963	PF3D7_1445700	237	S	___1	S(0.016)AES(0.984)NDKKK	4	RRQQEKKLNSNKSAESNDKKKKKNEENNTEK
PF3D7_0305300		conserved Plasmodium membrane protein, unknown function	0.718342	-3.9769	-3.25855	-4.08103	-3.87277	-3.25561	-3.2615	PF3D7_0305300	21	S	___1	MDVY(0.014)KEENS(0.015)DLLNHQEEEIS(0.904)RNS(0.065)NINDEFS(0.001)ETQLR	20	KEENSDLLNHQEEEISRNSNINDEFSETQLR
PF3D7_1133700		FHA domain-containing protein, putative	0.718277	-1.64763	-0.929355	-1.65063	-1.64463	-0.92906	-0.929649	PF3D7_1133700	542	S	___1	DT(0.012)NNS(0.985)IES(0.992)IILT(0.01)K	5	AERYDTELTTKDTNNSIESIILTKGKGADKR
PF3D7_0936800		Plasmodium exported protein (PHISTc), unknown function	0.717573	-0.707747	0.00982571	-0.65712	-0.758375	-0.0389595	0.0586109	PF3D7_0936800	277	T	___1	GYLGEVES(0.5)ET(0.5)IK	10	RGIFAKGYLGEVESETIKKKTEHHENVNEDN
PF3D7_0813300		conserved Plasmodium protein, unknown function	0.713063	0.759382	1.47245	0.93688	0.581884	1.61665	1.32824	PF3D7_0813300	240	S	___1	RS(1)LDNKSDGPLK	2	VENKKKGGDKKKNKRSLDNKSDGPLKKSKID
PF3D7_1120000		conserved Plasmodium protein, unknown function	0.711937	-0.0911922	0.620745	-0.0668392	-0.115545	0.75321	0.488279	PF3D7_1120000	755	S	___1	HLES(1)LKEEK	4	TSSTFIPSAKLKHLESLKEEKKKEVKTNIQP
PF3D7_0708400	HSP90	heat shock protein 90	0.711062	1.90273	2.6138	1.93629	1.86917	2.50031	2.72728	PF3D7_0708400	573	S	___1	EGLDIDDS(1)EEAKK	8	KKLKCCTKEGLDIDDSEEAKKDFETLKAEYE
PF3D7_0206300	AROM	pentafunctional AROM polypeptide, putative, pseudogene	0.710547	0.871408	1.58195	0.95944	0.783375	1.66543	1.49848	PF3D7_0206300	2508	S	___1	KVS(0.014)FS(0.89)DVCEIY(0.096)VDGPNFENK	5	QHTSTKKKIQKKVSFSDVCEIYVDGPNFENK
PF3D7_1230800	WTAP	pre-mRNA-splicing regulator, putative	0.709723	3.54062	4.25035	3.62063	3.46062	4.24041	4.26028	PF3D7_1230800	246	S	___1	NS(1)YSNINISK	2	YNESYNDIQKDYHKNSYSNINISKKKRNHNI
PF3D7_1436300	PTEX150	translocon component PTEX150	0.708714	-1.24322	-0.534504	-1.20265	-1.28378	-0.662249	-0.406759	PF3D7_1436300	822	Y	___1	KNS(0.034)EY(0.004)DLY(0.962)DDDDKEGGNFK	8	ENLIKFLKKNSEYDLYDDDDKEGGNFKSPLY
PF3D7_1409600		conserved Plasmodium protein, unknown function	0.707663	0.764458	1.47212	0.878611	0.650305	1.3793	1.56494	PF3D7_1409600	705	S	___1	RNS(1)DNS(0.955)Y(0.011)EEEPS(0.015)NT(0.01)T(0.008)K	3	LHHVDNLQHIRHRRNSDNSYEEEPSNTTKAK
PF3D7_0501400	FIRA	interspersed repeat antigen	0.706013	0.394928	1.10094	0.42654	0.363316	1.06607	1.13581	PF3D7_0501400	1336	S	___1	AS(0.25)LGS(0.75)VK	5	SFGRKDKKDKKASLGSVKETYEKETQTEEQE
PF3D7_0401800	PfD80	Plasmodium exported protein (PHISTb), unknown function	0.705897	-2.42152	-1.71562	-2.40697	-2.43607	-1.80782	-1.62342	PF3D7_0401800	283	T	___2	LPS(0.062)T(0.142)GS(0.871)T(0.935)IRFPS(0.51)T(0.424)GS(0.047)S(0.009)R	7	GSTSGSTTRLPSTGSTIRFPSTGSSRLEDYE
PF3D7_1347700	ECT	ethanolamine-phosphate cytidylyltransferase	0.704577	2.67043	3.37501	2.74602	2.59484	3.30408	3.44593	PF3D7_1347700	361	T	___1	NKDNPNILEITEEQIY(0.102)NS(0.871)ELGIS(0.284)DDNKT(0.743)K	28	EQIYNSELGISDDNKTKVSEQQHDIDTLPKN
PF3D7_0202000	KAHRP	knob-associated histidine-rich protein	0.703841	1.23229	1.93613	0.888731	1.57585	1.91251	1.95975	PF3D7_0202000	472	S	___1	S(0.001)DGS(0.999)KAHEK	4	ENKNKEKTNNSKSDGSKAHEKKENETKNTAG
PF3D7_1466400	ApiAP2	AP2 domain transcription factor AP2-SP	0.703802	0.779663	1.48347	0.780781	0.778545	1.30663	1.6603	PF3D7_1466400	670	S	___1	HLS(0.98)QT(0.02)IDMNQK	3	NNNGTSSQSTNPKHLSQTIDMNQKQSSHTSQ
PF3D7_1140700		conserved Plasmodium protein, unknown function	0.703253	-0.500077	0.203176	-0.441969	-0.558186	0.14723	0.259121	PF3D7_1140700	88	T	___1	NYDS(0.168)DENT(0.831)WEPFENLSPNLK	8	FEFYIKWKNYDSDENTWEPFENLSPNLKGQA
PF3D7_1328500		alpha/beta-hydrolase, putative	0.702413	1.61804	2.32045	1.61673	1.61934	2.26333	2.37757	PF3D7_1328500	922	S	___1	FFENS(1)YIK	5	SEDYSNQTCNKFFENSYIKLSKSTLKNEKEL
PF3D7_0706500		conserved Plasmodium protein, unknown function	0.702283	-3.17411	-2.47183	-3.45755	-2.89068	-2.55317	-2.39049	PF3D7_0706500	1519	S	___1	KDS(0.007)S(0.007)NKNDNS(0.536)S(0.449)NQGDK	10	KLNFNKKDSSNKNDNSSNQGDKKLSDRKNGN
PF3D7_0305200		conserved Plasmodium protein, unknown function	0.698539	-1.38021	-0.681674	-1.25226	-1.50817	-0.676199	-0.687149	PF3D7_0305200	188	S	___1	S(0.008)T(0.008)S(0.505)INY(0.02)T(0.455)DNS(0.005)FVLNK	3	YENVLNDNFIKSRSTSINYTDNSFVLNKENL
PF3D7_0904600		ubiquitin specific protease, putative	0.698287	-2.29737	-1.59908	-2.39976	-2.19497	-1.5191	-1.67906	PF3D7_0904600	1151	S	___2	VCS(1)S(1)NCGEQQVTEK	3	HIKNAQNNTTNNRVCSSNCGEQQVTEKINNI
PF3D7_0904600		ubiquitin specific protease, putative	0.698287	-2.29737	-1.59908	-2.39976	-2.19497	-1.5191	-1.67906	PF3D7_0904600	1152	S	___2	VCS(1)S(1)NCGEQQVTEK	4	IKNAQNNTTNNRVCSSNCGEQQVTEKINNIL
PF3D7_0726100		Plasmodium exported protein, unknown function	0.698162	-0.303052	0.39511	-0.327299	-0.278805	0.323481	0.46674	PF3D7_0726100	170	S	___1	RIYS(1)NAEK	4	EKLKNKKLESPKRIYSNAEKKIKEEKFQGHK
PF3D7_1229500	CCT3	T-complex protein 1 subunit gamma	0.697633	-2.41278	-1.71515	-2.45184	-2.37373	-1.75632	-1.67398	PF3D7_1229500	35	S	___1	AVS(1)DIVK	3	GRKTQLSNIQASRAVSDIVKTTLGPMAMLKM
PF3D7_0708400	HSP90	heat shock protein 90	0.696418	2.5347	3.23112	2.62138	2.44802	3.21822	3.24401	PF3D7_0708400	218	T	___1	QNEKEIT(1)AS(1)EEEEGEGEGEREGEEEEEK	7	FPIKLYCERQNEKEITASEEEEGEGEGEREG
PF3D7_1039000	FIKK10.2	serine/threonine protein kinase, FIKK family	0.695518	2.72951	3.42502	2.82378	2.63523	3.40558	3.44447	PF3D7_1039000	148	S	___1	GKS(1)NLYHNGK	3	YKKRRGKLREKKKGKSNLYHNGKNKKNVSNC
PF3D7_1238800	ACS11	acyl-CoA synthetase	0.695518	-1.33749	-0.64197	-1.6297	-1.04527	-0.162319	-1.12162	PF3D7_1238800	339	S	___2	MNT(1)NNRS(1)IDER	7	NNNNNNIQKMNTNNRSIDERNNYLMKQIKKN
PF3D7_1238800	ACS11	acyl-CoA synthetase	0.695518	-1.33749	-0.64197	-1.6297	-1.04527	-0.162319	-1.12162	PF3D7_1238800	335	T	___2	MNT(1)NNRS(1)IDER	3	NNNNNNNNNNIQKMNTNNRSIDERNNYLMKQ
PF3D7_0831000	GEXP09	Plasmodium exported protein (PHISTb), unknown function	0.693406	-0.713696	-0.0202904	-0.690119	-0.737274	-0.0739403	0.0333595	PF3D7_0831000	119	S	___1	S(1)LNGEYSDNPLFDYK	1	KDDNISNKWYEENKRSLNGEYSDNPLFDYKL
PF3D7_0730900	PTP4	EMP1-trafficking protein	0.693248	4.88732	5.58057	5.0175	4.75714	5.45257	5.70856	PF3D7_0730900	1178	S	___1	VEKEMS(1)IHDGMK	6	YKHLTDEENKVEKEMSIHDGMKGQKYGSKNV
PF3D7_0922500	PGK	phosphoglycerate kinase	0.693177	-1.96854	-1.27536	-1.98544	-1.95164	-1.37734	-1.17339	PF3D7_0922500	351	S	___1	GS(1)IECLNLVVEVTK	2	NGPQGVFEMPNFAKGSIECLNLVVEVTKKGA
PF3D7_0206300	AROM	pentafunctional AROM polypeptide, putative, pseudogene	0.693003	-1.82818	-1.13518	-1.85642	-1.79995	-0.99832	-1.27204	PF3D7_0206300	2506	S	___1	KVS(0.5)FS(0.5)DVCEIYVDGPNFENK	3	DNQHTSTKKKIQKKVSFSDVCEIYVDGPNFE
PF3D7_0215300	ACS8	acyl-CoA synthetase	0.692713	0.259208	0.951921	0.284191	0.234224	0.875521	1.02832	PF3D7_0215300	855	S	___2	S(0.955)T(0.044)DAS(0.001)LKIPEK	1	QQNNMSNITLKNTLKSTDASLKIPEKNKVQT
PF3D7_0818000	SNRNP27	conserved protein, unknown function	0.691758	1.1866	1.87836	1.25291	1.12029	1.8737	1.88301	PF3D7_0818000	292	S	___1	NQNQDKNQS(1)QDKYQNEEK	9	DHDNKNKNQNQDKNQSQDKYQNEEKNNDILN
PF3D7_0220000	LSA3	liver stage antigen 3	0.691318	1.02422	1.71554	1.10874	0.939705	1.63674	1.79434	PF3D7_0220000	1222	S	___1	GDMELGDMDKES(1)LEDVTAK	12	DMLKGDMELGDMDKESLEDVTAKLGERVESL
PF3D7_1342000		40S ribosomal protein S6	0.691017	0.218073	0.90909	0.0356503	0.400496	0.89238	0.9258	PF3D7_1342000	15	S	___1	S(1)IEIDDEKK	1	_MKLNISNPLNNVQKSIEIDDEKKLLPFMEK
PF3D7_1128600	NOT2	CCR4-NOT transcription complex subunit 2, putative	0.689682	-0.317872	0.37181	-0.214159	-0.421585	0.31114	0.43248	PF3D7_1128600	313	T	___1	TIINDDVVYDINEEHT(1)S(1)ADEKIEK	16	TIINDDVVYDINEEHTSADEKIEKLRNDDIL
PF3D7_1039000	FIKK10.2	serine/threonine protein kinase, FIKK family	0.688972	2.05349	2.74247	2.11661	1.99038	2.70441	2.78052	PF3D7_1039000	353	T	___1	FDGDQENIT(0.997)S(0.141)S(0.861)FER	9	NDIKKRRFDGDQENITSSFERTQKSVKYDSD
PF3D7_0702500		Plasmodium exported protein, unknown function	0.686519	0.257637	0.944156	0.24761	0.267664	0.836761	1.05155	PF3D7_0702500	155	S	___2	NNSDGSTENHLSGS(0.004)NS(0.995)DGR	16	NNSDGSTENHLSGSNSDGRNSSQHSVGSHSV
PF3D7_0701600	MC-2TM	Pfmc-2TM Maurer's cleft two transmembrane protein	0.686293	-3.09932	-2.41302	-3.17305	-3.02559	-2.5653	-2.26075	PF3D7_0701600	86	S	___1	KNPDDQISDLVS(1)LVDNMNITQEK	12	GSKKKNPDDQISDLVSLVDNMNITQEKKNEI
PF3D7_0916700	HoMu	RNA-binding protein musashi, putative	0.686192	-2.62861	-1.94242	-2.70759	-2.54963	-2.0005	-1.88433	PF3D7_0916700	82	S	___1	GDEEEHDEKS(1)LGEDNK	10	SNISIKGDEEEHDEKSLGEDNKSVKDDESEA
PF3D7_1352400		conserved Plasmodium protein, unknown function	0.683908	-6.20595	-5.52204	-6.0631	-6.34879	-5.52204	NaN	PF3D7_1352400	8	Y	___1	MNDFS(0.462)EEY(0.538)DFMQR	8	________MNDFSEEYDFMQRIHKVEGYNEC
PF3D7_0603600		conserved Plasmodium protein, unknown function	0.683632	-1.70747	-1.02384	-1.67088	-1.74406	-1.03035	-1.01733	PF3D7_0603600	1091	S	___1	EGRIS(0.988)NT(0.012)R	5	DNQENNNFFSKEGRISNTRDVIKNEEKHSKK
PF3D7_0401800	PfD80	Plasmodium exported protein (PHISTb), unknown function	0.683358	-0.618692	0.0646658	-0.818769	-0.418615	0.0523014	0.0770302	PF3D7_0401800	166	T	___1	SASTAS(0.209)T(0.791)AR	7	SASAASTTRSASTASTARSASTASTASAASA
PF3D7_1010600	eIF2beta	eukaryotic translation initiation factor 2 subunit beta	0.683003	-1.99253	-1.30953	-1.97098	-2.01409	-1.39776	-1.2213	PF3D7_1010600	199	S	___1	RS(1)VTTIK	2	TRLFHQHCNACGAKRSVTTIKSGFHALGRGE
PF3D7_0301600	GEXP21	Plasmodium exported protein (hyp1), unknown function	0.682873	-3.80463	-3.12176	-3.73402	-3.87525	-3.23789	-3.00563	PF3D7_0301600	598	S	___1	IS(0.802)T(0.156)S(0.041)SHSTR	2	DPSEYKNSPFKESKISTSSHSTRSYENEFNL
PF3D7_0401800	PfD80	Plasmodium exported protein (PHISTb), unknown function	0.682262	3.39952	4.08179	3.49	3.30905	3.96955	4.19402	PF3D7_0401800	65	S	___1	SSSCSS(1)LASTTK	6	EEKAEDDYKKSSSCSSLASTTKRSPSTASTS
PF3D7_0719700	RPS10	40S ribosomal protein S10, putative	0.681883	1.42913	2.11102	1.48384	1.37442	2.06326	2.15877	PF3D7_0719700	118	S	___1	MDEDIS(1)RDVR	6	SKKTVNRAPKMDEDISRDVRQPMGRGRAFDR
PF3D7_0402100		Plasmodium exported protein (PHISTb), unknown function	0.681717	3.16071	3.84243	3.27484	3.04659	3.77197	3.91289	PF3D7_0402100	84	S	___1	LTDVINYGEGS(1)LLK	11	GKLYKLTDVINYGEGSLLKQVPKEESENSNN
PF3D7_0102200	RESA	ring-infected erythrocyte surface antigen	0.681337	2.40604	3.08738	2.56341	2.24867	2.94006	3.2347	PF3D7_0102200	384	T	___1	AS(0.151)IT(0.816)NS(0.033)AINYYDTVK	4	VNEYGDILPSLRASITNSAINYYDTVKDGVY
PF3D7_0401800	PfD80	Plasmodium exported protein (PHISTb), unknown function	0.681242	-0.0955973	0.585645	-0.082119	-0.109076	0.49589	0.6754	PF3D7_0401800	360	Y	___1	NLDLY(1)DEHEAKK	5	DCKDAANYILKNLDLYDEHEAKKHASDRTKT
PF3D7_1436300	PTEX150	translocon component PTEX150	0.681157	-1.53568	-0.854525	-1.44786	-1.6235	-0.89366	-0.81539	PF3D7_1436300	950	Y	___1	NNS(0.024)NDDDDMDNGY(0.964)VT(0.011)FDGK	13	NTKNNSNDDDDMDNGYVTFDGKNKVSENDDD
PF3D7_1131800		oxysterol-binding protein, putative	0.680547	-3.03925	-2.3587	-2.69674	-3.38175	-2.48067	-2.23673	PF3D7_1131800	807	S	___2	NT(0.018)VS(0.983)T(0.999)EDDIALGDVR	4	ILNNKNINETKRNTVSTEDDIALGDVRDGLI
PF3D7_1131800		oxysterol-binding protein, putative	0.680547	-3.03925	-2.3587	-2.69674	-3.38175	-2.48067	-2.23673	PF3D7_1131800	808	T	___2	NT(0.018)VS(0.983)T(0.999)EDDIALGDVR	5	LNNKNINETKRNTVSTEDDIALGDVRDGLIT
PF3D7_1431700		60S ribosomal protein L14, putative	0.680308	-0.895883	-0.215574	-0.928909	-0.862856	-0.346359	-0.0847893	PF3D7_1431700	124	T	___1	RDEAT(1)DFER	5	KLGKKMIIKKKRDEATDFERFQVYFAKRELK
PF3D7_0532300		Plasmodium exported protein (PHISTb), unknown function	0.679213	0.912173	1.59139	0.924021	0.900326	1.49492	1.68785	PF3D7_0532300	346	T	___1	NYSTHENT(1)YPTLK	8	FKNGKFLKNYSTHENTYPTLKTLLEKYAITD
PF3D7_0401800	PfD80	Plasmodium exported protein (PHISTb), unknown function	0.678873	2.92939	3.60826	2.93347	2.92531	3.40123	3.8153	PF3D7_0401800	183	S	___1	SASTASTASAASAAS(0.962)T(0.036)T(0.001)R	15	RSASTASTASAASAASTTRSASAASTTRSAS
PF3D7_1466400	ApiAP2	AP2 domain transcription factor AP2-SP	0.678738	0.678238	1.35698	0.71422	0.642256	1.15965	1.5543	PF3D7_1466400	672	T	___1	HLS(0.448)QT(0.552)IDMNQK	5	NGTSSQSTNPKHLSQTIDMNQKQSSHTSQYS
PF3D7_0801800		mannose-6-phosphate isomerase, putative	0.677517	-1.8732	-1.19568	-1.99184	-1.75456	-1.23718	-1.15419	PF3D7_0801800	118	S	___1	DNNKS(1)NDDDNNKNNNNNDK	5	NDINNVSKNIRDNNKSNDDDNNKNNNNNDKY
PF3D7_1128600	NOT2	CCR4-NOT transcription complex subunit 2, putative	0.677338	0.734057	1.4114	0.78582	0.682295	1.35248	1.47031	PF3D7_1128600	314	S	___1	TIINDDVVYDINEEHT(1)S(1)ADEKIEK	17	IINDDVVYDINEEHTSADEKIEKLRNDDILK
PF3D7_1329500		conserved Plasmodium protein, unknown function	0.677133	-0.741173	-0.0640402	-0.62904	-0.853306	-0.0725498	-0.0555305	PF3D7_1329500	1061	T	___1	Y(0.002)EIS(0.404)T(0.582)ENNES(0.004)T(0.004)T(0.004)LHLPMNDMDVGK	5	HNEYNEEIDVKYEISTENNESTTLHLPMNDM
PF3D7_0202400	PTEF	gamete antigen 27/25, putative	0.675978	1.98545	2.66143	2.04726	1.92364	2.59831	2.72454	PF3D7_0202400	563	T	___1	DEEET(1)EEDEKETEVEK	5	ETKVEEKKTERDEEETEEDEKETEVEKKKTE
PF3D7_1128600	NOT2	CCR4-NOT transcription complex subunit 2, putative	0.675887	-1.01644	-0.340555	-1.10239	-0.930494	-0.4049	-0.276211	PF3D7_1128600	306	Y	___2	TIINDDVVY(0.982)DINEEHT(0.18)S(0.838)ADEKIEK	9	KNGNNQKTIINDDVVYDINEEHTSADEKIEK
PF3D7_1011800	PREBP	PRE-binding protein	0.675877	1.70045	2.37633	1.5939	1.807	2.23852	2.51414	PF3D7_1011800	258	S	___1	KS(1)ENDLKK	2	DWKKEIKLKEDERKKSENDLKKKFVKLNKAD
PF3D7_1407100	NOP1	rRNA 2'-O-methyltransferase fibrillarin, putative	0.675868	1.13566	1.81153	1.15884	1.11248	1.85766	1.7654	PF3D7_1407100	4	S	___1	T(0.003)DS(0.997)FRGGSGNFK	3	____________MTDSFRGGSGNFKRNSNNF
PF3D7_1039000	FIKK10.2	serine/threonine protein kinase, FIKK family	0.674728	1.87331	2.54804	1.95084	1.79578	2.51551	2.58057	PF3D7_1039000	355	S	___1	RFDGDQENITS(0.019)S(0.981)FER	12	IKKRRFDGDQENITSSFERTQKSVKYDSDES
PF3D7_0730900	PTP4	EMP1-trafficking protein	0.672792	3.66547	4.33826	3.75702	3.57392	4.27587	4.40065	PF3D7_0730900	1815	S	___1	IEKDANS(0.982)GS(0.018)ELKNTNNK	7	GTNVPDKLKIEKDANSGSELKNTNNKEKEVK
PF3D7_0202000	KAHRP	erythrocyte membrane protein 1, PfEMP1;knob-associated histidine-rich protein	0.671779	6.76371	7.43549	6.63571	6.8917	7.56449	7.30648	PF3D7_0202000;PF3D7_1255200	548;1772	S	___1	EAS(0.991)T(0.007)S(0.002)KEAT(0.047)KEAS(0.774)T(0.152)S(0.026)K	3	QCAAEGATKGATKEASTSKEATKEASTSKEA
PF3D7_0911900	ICP	falstatin	0.671659	-2.20487	-1.53321	-2.06694	-2.34281	-1.69708	-1.36935	PF3D7_0911900	237	S	___1	IFS(0.395)EEENT(0.602)EVES(0.925)AENNHT(0.039)NS(0.039)LNPNESCDQIIK	12	LKARIFSEEENTEVESAENNHTNSLNPNESC
PF3D7_1316500	PRP40	pre-mRNA-processing factor 40, putative	0.671612	-2.70694	-2.03533	-2.63823	-2.77565	-1.98761	-2.08305	PF3D7_1316500	906	S	___1	TIENAS(0.018)S(0.982)	7	SAQTIESLRTIENASS_______________
PF3D7_1323400	RPL23	60S ribosomal protein L23	0.671267	1.03699	1.70826	1.0312	1.04279	1.68199	1.73453	PF3D7_1323400	175	S	___1	LS(1)GEHDALEVANK	2	VLNTLNGDKKAYVRLSGEHDALEVANKIGIL
PF3D7_0215300	ACS8	acyl-CoA synthetase	0.669852	0.573823	1.24368	0.583691	0.563955	1.1882	1.29915	PF3D7_0215300	859	S	___2	NT(0.396)LKS(0.602)T(0.007)DAS(0.995)LKIPEK	9	MSNITLKNTLKSTDASLKIPEKNKVQTNKSR
PF3D7_0818900	HSP70	heat shock protein 70	0.669573	-2.78471	-2.11513	-2.73721	-2.8322	-2.21032	-2.01995	PF3D7_0818900	96	S	___1	FT(0.002)ES(0.003)S(0.021)VQS(0.974)DMKHWPFTVK	8	AKRLIGRKFTESSVQSDMKHWPFTVKSGVDE
PF3D7_1403700	TRAM	translocation associated membrane protein, putative	0.668879	-0.451813	0.217066	-0.39332	-0.510305	0.361631	0.0725002	PF3D7_1403700	342	S	___1	IT(0.003)DIRS(0.997)DNEDDSTSTMESIKK	6	FIIKTMKNEKITDIRSDNEDDSTSTMESIKK
PF3D7_0106300	ATP6	calcium-transporting ATPase	0.668372	1.22165	1.89002	1.08084	1.36246	1.99297	1.78707	PF3D7_0106300	482	S	___2	S(1)NENTIISR	1	SRSGAKRNIPLKEMKSNENTIISRGSKILED
PF3D7_0532400	LyMP	lysine-rich membrane-associated PHISTb protein	0.667098	-1.42862	-0.761519	-1.34478	-1.51245	-0.74836	-0.774679	PF3D7_0532400	338	S	___1	RPNYYPS(0.841)NS(0.159)APHVIDYIYK	7	QSTNPQVYRRPNYYPSNSAPHVIDYIYKVGY
PF3D7_0401800	PfD80	Plasmodium exported protein (PHISTb), unknown function	0.666082	2.96408	3.63017	3.09026	2.8379	3.5776	3.68273	PF3D7_0401800	292	S	___2	FPS(0.333)T(0.372)GS(0.441)S(0.854)RLEDYEK	7	LPSTGSTIRFPSTGSSRLEDYEKEGSNVDIT
PF3D7_0112200	MRP1	multidrug resistance-associated protein 1	0.665723	-3.62897	-2.96325	-3.47899	-3.77896	-2.81854	-3.10796	PF3D7_0112200	244	S	___2	KFS(0.678)S(0.129)QT(0.196)EIDEIS(0.997)R	12	NTYRKFSSQTEIDEISRDFLSIGKNASSSSS
PF3D7_0202000	KAHRP	knob-associated histidine-rich protein	0.664532	-3.2605	-2.59596	-3.06783	-3.45317	-2.53714	-2.65479	PF3D7_0202000	600	T	___1	GAS(0.757)T(0.835)T(0.864)AGS(0.271)T(0.268)T(0.005)GATTGANAVQSK	5	KEASTTEGATKGASTTAGSTTGATTGANAVQ
PF3D7_0802600	ACbeta	adenylyl cyclase beta	0.664523	0.120148	0.784671	0.23789	0.00240517	0.870071	0.69927	PF3D7_0802600	553	S	___1	RNS(1)LEDK	3	ENISKNNIKDNKRRNSLEDKIKKRFTLLSTD
PF3D7_0111500		UMP-CMP kinase, putative	0.661552	0.487773	1.14933	0.278831	0.696714	0.99733	1.30132	PF3D7_0111500	212	S	___1	KDS(0.997)FS(0.003)FKK	3	ELNDQGESGVEKKKDSFSFKKLDENANIKNI
PF3D7_1027300	nPrx	peroxiredoxin	0.660623	0.0747128	0.735335	-0.25124	0.400665	0.72727	0.743401	PF3D7_1027300	290	S	___1	KNS(1)VVK	3	KSNAKGANKKGGKKNSVVKKEDNKKKGKNNK
PF3D7_1344100		krox-like protein, putative	0.660568	0.172597	0.833165	0.3384	0.00679398	0.94725	0.71908	PF3D7_1344100	222	Y	___1	NSFDLVY(0.784)S(0.216)DSNVNTINK	7	DDNSLDKKRNSFDLVYSDSNVNTINKNNKKE
PF3D7_1428300		proliferation-associated protein 2g4, putative	0.660188	0.534292	1.19448	0.5415	0.527084	1.16514	1.22382	PF3D7_1428300	359	S	___1	NILSLPLS(1)GK	8	SIQDETLKNILSLPLSGKKKKNKAKNNEEAN
PF3D7_1140700		conserved Plasmodium protein, unknown function	0.659828	3.90997	4.5698	4.04307	3.77687	4.51904	4.62055	PF3D7_1140700	971	S	___1	SLS(1)DFIDEDKIFK	3	NSNSNIRNMIHNKSLSDFIDEDKIFKQKSGK
PF3D7_0702500		Plasmodium exported protein, unknown function	0.659701	0.795033	1.45473	0.762741	0.827326	1.37266	1.53681	PF3D7_0702500	142	S	___2	NNS(1)DGS(0.961)T(0.039)ENHLSGSNSDGR	3	HNLDGQKESQLYKNNSDGSTENHLSGSNSDG
PF3D7_0918900	gammaGCS	gamma-glutamylcysteine synthetase	0.658013	1.30961	1.96762	1.27466	1.34455	1.84122	2.09402	PF3D7_0918900	243	S	___1	ISSIEMVSYEMDENKSTNFVNS(0.999)DTVFAK	22	VSYEMDENKSTNFVNSDTVFAKNDEEGEVEE
PF3D7_1227700	KIC2	conserved Plasmodium protein, unknown function	0.657509	1.79694	2.45445	1.81246	1.78141	2.37638	2.53251	PF3D7_1227700	212	T	___1	LEEIIEENESHT(1)ERTEGDNFMMSK	12	KIFKLEEIIEENESHTERTEGDNFMMSKMKS
PF3D7_1343700	Kelch13	kelch protein K13	0.656718	-1.32336	-0.666644	-1.39768	-1.24904	-0.727989	-0.605299	PF3D7_1343700	97	S	___1	DFLPS(1)NLS(1)R	5	SVLDSNFDSKKDFLPSNLSRTFNNMSKDNIG
PF3D7_0206300	AROM	pentafunctional AROM polypeptide, putative, pseudogene	0.656338	-3.50015	-2.84381	-3.39948	-3.60083	-2.93571	-2.75192	PF3D7_0206300	1449	S	___1	NDDS(0.445)AS(0.542)KGT(0.013)NEHMMQR	6	EEEGNNNIIKNDDSASKGTNEHMMQRINDAE
PF3D7_0614400	CWF7	pre-mRNA-splicing factor CWF7, putative	0.656118	0.248503	0.904621	0.372952	0.124054	0.898232	0.911011	PF3D7_0614400	8	S	___1	MDMQEQIS(0.999)DKGADDY(0.001)DDTLVELK	8	________MDMQEQISDKGADDYDDTLVELK
PF3D7_0209800	UAP56	ATP-dependent RNA helicase UAP56	0.656068	-0.0389328	0.617135	-0.12187	0.0440044	0.45113	0.78314	PF3D7_0209800	48	S	___1	GGAMRGS(0.991)YAT(0.009)VHTGGFK	7	NNILNNNNKGGAMRGSYATVHTGGFKDFFLK
PF3D7_0206300	AROM	pentafunctional AROM polypeptide, putative, pseudogene	0.653624	-2.46719	-1.81357	-2.52088	-2.41351	-1.75415	-1.87299	PF3D7_0206300	2514	Y	___1	KVS(0.372)FS(0.063)DVCEIY(0.565)VDGPNFENK	11	KKIQKKVSFSDVCEIYVDGPNFENKNYDDNI
PF3D7_0813000	KIC7	conserved Plasmodium protein, unknown function	0.653342	1.30977	1.96311	1.31949	1.30005	1.8657	2.06052	PF3D7_0813000	338	S	___1	LNEDS(1)DINNK	5	KMNYPNNFNVKLNEDSDINNKMKYNNKMSMV
PF3D7_0402400	GEXP18	Plasmodium exported protein, unknown function	0.652907	-1.84165	-1.18874	-1.74319	-1.94011	-1.2495	-1.12798	PF3D7_0402400	132	S	___1	LGNDS(0.001)IGDNIS(0.974)IVDFNGENNVEVT(0.024)FPDDNINEK	11	SENVKLGNDSIGDNISIVDFNGENNVEVTFP
PF3D7_1221900		conserved Plasmodium membrane protein, unknown function	0.652848	-2.76362	-2.11077	-2.93687	-2.59037	-2.2632	-1.95834	PF3D7_1221900	232	S	___1	FDLNANPET(0.075)LIINS(0.73)DINT(0.155)Y(0.032)EPS(0.008)QNNVGPEIK	14	FKFDLNANPETLIINSDINTYEPSQNNVGPE
PF3D7_0708400	HSP90	heat shock protein 90	0.652798	-0.182007	0.470791	-0.240259	-0.123755	0.529371	0.41221	PF3D7_0708400	155	S	___1	NNDDEQYVWESAAGGS(0.958)FT(0.04)VT(0.002)KDETNEK	16	NNDDEQYVWESAAGGSFTVTKDETNEKLGRG
PF3D7_1412500	ACT2	actin II	0.651744	-1.15913	-0.507384	-1.10663	-1.21163	-0.473299	-0.54147	PF3D7_1412500	230	S	___1	S(0.6)EEHS(0.4)DEIEEIYELPDGNLITVGSER	1	KLCYIAMDYDEELKRSEEHSDEIEEIYELPD
PF3D7_0201900	EMP3	erythrocyte membrane protein 3	0.650967	3.10327	3.75424	3.13724	3.06931	3.6203	3.88818	PF3D7_0201900	2426	S	___2	NVKDDELS(1)DNES(0.911)S(0.088)DNEKSK	12	DGLKNVKDDELSDNESSDNEKSKKNLRGKKN
PF3D7_0631100		Plasmodium exported protein (PHISTb), unknown function	0.650693	-1.71759	-1.0669	-1.72216	-1.71303	-1.12298	-1.01082	PF3D7_0631100;PF3D7_0601500	91;91	S	___1	INS(1)ICKDNNEDIVFLDELR	3	YLMISRRLPKIKRINSICKDNNEDIVFLDEL
PF3D7_0201900	EMP3	erythrocyte membrane protein 3	0.649893	3.21985	3.86974	3.26038	3.17932	3.74002	3.99946	PF3D7_0201900	2422	S	___2	NVKDDELS(1)DNESSDNEK	8	NKPTDGLKNVKDDELSDNESSDNEKSKKNLR
PF3D7_1237900		conserved Plasmodium protein, unknown function	0.648348	-0.473567	0.174781	-0.54884	-0.398294	0.100071	0.249491	PF3D7_1237900	378	S	___2	YEEEEDIS(1)EIYEEDR	8	EGEHITIRYEEEEDISEIYEEDRASRIYEED
PF3D7_1237900		conserved Plasmodium protein, unknown function	0.648348	-0.473567	0.174781	-0.54884	-0.398294	0.100071	0.249491	PF3D7_1237900	387	S	___2	YEEEEDIS(1)EIYEEDRAS(1)R	17	EEEEDISEIYEEDRASRIYEEDRASGIYEEE
PF3D7_0918900	gammaGCS	gamma-glutamylcysteine synthetase	0.647348	-0.298287	0.349061	-0.31443	-0.282145	0.424171	0.273951	PF3D7_0918900	309	T	___1	NKEKDNT(1)PR	7	VYDDEIENKNKEKDNTPRSCNDYNNVNDSSN
PF3D7_1200700	ACS7	acyl-CoA synthetase	0.646812	0.625134	1.27195	0.638311	0.611956	1.45843	1.08546	PF3D7_1200700	755	S	___1	S(0.051)GS(0.948)KS(0.001)DIK	3	LSGNSTGSMNNGKSGSKSDIKGGSKDDIKSG
PF3D7_1142100		conserved Plasmodium protein, unknown function	0.645817	-1.47318	-0.82736	-1.14392	-1.80243	-0.78046	-0.87426	PF3D7_1142100	507	S	___1	ENNCEY(0.231)T(0.769)DVDETSNVFNNLS(1)DNYIK	20	EYTDVDETSNVFNNLSDNYIKNKNIRKQKRK
PF3D7_1438400	MCA2	metacaspase-like protein	0.644283	1.71616	2.36044	1.8566	1.57571	2.31904	2.40184	PF3D7_1438400	1312	S	___1	SVHYDMDEILS(1)LK	11	KKKIKSVHYDMDEILSLKCKVYDELDTCLKC
PF3D7_1039000	FIKK10.2	serine/threonine protein kinase, FIKK family	0.643422	-0.896517	-0.253095	-0.868979	-0.924055	-0.252119	-0.25407	PF3D7_1039000	354	S	___1	RFDGDQENIT(0.618)S(0.704)S(0.678)FER	11	DIKKRRFDGDQENITSSFERTQKSVKYDSDE
PF3D7_1134600		zinc finger protein, putative	0.643292	1.4366	2.0799	1.38274	1.49047	2.02658	2.13321	PF3D7_1134600	42	S	___1	SYS(1)QGDNEK	3	KNNNLSTLEKDKRSYSQGDNEKLICVQLNIE
PF3D7_0801000		Plasmodium exported protein (PHISTc), unknown function	0.642337	1.11794	1.76028	1.2069	1.02898	1.70698	1.81358	PF3D7_0801000	966	S	___1	RS(0.001)NS(0.999)IPEGR	4	YPEEERYNYNNKRSNSIPEGRNYEENAYERG
PF3D7_0405700		lysine decarboxylase, putative	0.642082	0.330363	0.972445	0.453131	0.207596	0.852201	1.09269	PF3D7_0405700	1192	S	___1	RYVYDEYNES(1)VKEYSPNDDTNYDATYK	10	KDGSEKRYVYDEYNESVKEYSPNDDTNYDAT
PF3D7_0702500		Plasmodium exported protein, unknown function	0.642062	2.49154	3.13361	2.51651	2.46658	3.10001	3.1672	PF3D7_0702500	204	S	___1	NYS(0.977)LGNLS(0.023)TGTTS(0.002)QGS(0.987)T(0.01)SSR	16	NYSLGNLSTGTTSQGSTSSRHYSLGGQPSSS
PF3D7_0716000		RNA-binding protein, putative	0.641593	-1.40861	-0.767015	-1.39048	-1.42673	-0.947699	-0.58633	PF3D7_0716000	491	S	___1	FDS(1)PPHS(1)CDEEDNIK	7	ERERRKSYKFDSPPHSCDEEDNIKLSKTTIS
PF3D7_1448600	VTI1	SNARE protein, putative	0.641453	2.7458	3.38726	2.71914	2.77246	3.40838	3.36613	PF3D7_1448600	117	S	___1	YVS(1)AKDIETK	3	KQAKENKKLLKVRYVSAKDIETKGDIIQDQT
PF3D7_0721600		40S ribosomal protein S5, putative	0.640471	-0.569052	0.0714197	-0.436739	-0.701365	0.0043602	0.138479	PF3D7_0721600	175	S	___1	SISECLAEEIINCANES(0.848)S(0.131)S(0.02)SYAIKK	17	ISECLAEEIINCANESSSSYAIKKKDEIERV
PF3D7_0623100	NAB2	nuclear polyadenylated RNA-binding protein NAB2, putative	0.640282	-0.337017	0.303265	-0.12595	-0.548084	0.31485	0.291679	PF3D7_0623100	269	S	___2	ISDS(1)ADEYNNS(1)EKK	11	ITYKRISDSADEYNNSEKKNKAVLKPNPRFV
PF3D7_1149000	Pf332	antigen 332, DBL-like protein	0.639807	-1.71643	-1.07662	-1.65087	-1.78198	-1.07909	-1.07415	PF3D7_1149000	4891	T	___1	S(0.106)S(0.137)T(0.757)DEIVEVEDLFTEEVKER	3	EQASTTEEFVEERSSTDEIVEVEDLFTEEVK
PF3D7_0713900		conserved Plasmodium protein, unknown function	0.639682	-0.815601	-0.17592	-0.778028	-0.853174	-0.255989	-0.09585	PF3D7_0713900	164	T	___1	MNMDT(0.589)S(0.411)MDKNDLIIDDVTK	5	YNESNDNKFFKMNMDTSMDKNDLIIDDVTKN
PF3D7_1233600	AARP1	asparagine and aspartate rich protein 1	0.639637	-5.29729	-4.65765	-4.98717	-5.6074	-4.44073	-4.87457	PF3D7_1233600	730	S	___3	S(1)Y(1)NKMY(1)NNNK	1	IPCDDNKNIPRDDNKSYNKMYNNNKMNKELT
PF3D7_1233600	AARP1	asparagine and aspartate rich protein 1	0.639637	-5.29729	-4.65765	-4.98717	-5.6074	-4.44073	-4.87457	PF3D7_1233600	731	Y	___3	S(1)Y(1)NKMY(1)NNNK	2	PCDDNKNIPRDDNKSYNKMYNNNKMNKELTY
PF3D7_1233600	AARP1	asparagine and aspartate rich protein 1	0.639637	-5.29729	-4.65765	-4.98717	-5.6074	-4.44073	-4.87457	PF3D7_1233600	735	Y	___3	S(1)Y(1)NKMY(1)NNNK	6	NKNIPRDDNKSYNKMYNNNKMNKELTYNDEY
PF3D7_1436300	PTEX150	translocon component PTEX150	0.639207	-2.02921	-1.39	-1.75799	-2.30042	-1.3925	-1.3875	PF3D7_1436300	243	S	___1	DNLQSFLS(0.123)S(0.797)LT(0.08)GNK	9	IGKMMNKDNLQSFLSSLTGNKDGSGKNPLSD
PF3D7_0401800	PfD80	Plasmodium exported protein (PHISTb), unknown function	0.638983	-1.53938	-0.900399	-1.61485	-1.46391	-0.940079	-0.86072	PF3D7_0401800	165	S	___1	SAS(0.001)T(0.028)AS(0.956)T(0.015)AR	6	RSASAASTTRSASTASTARSASTASTASAAS
PF3D7_0201900	EMP3	erythrocyte membrane protein 3	0.638518	-0.469883	0.168635	-0.35141	-0.588356	0.0894604	0.24781	PF3D7_0201900	2427	S	___2	NVKDDELS(0.999)DNES(0.026)S(0.974)DNEK	13	GLKNVKDDELSDNESSDNEKSKKNLRGKKN_
PF3D7_1006800	GBP2	single-strand telomeric DNA-binding protein GBP2, putative	0.637994	-0.199338	0.438656	-0.0265102	-0.372166	0.332701	0.544611	PF3D7_1006800	205	S	___1	NEDNS(0.5)S(0.5)KELIGVVIMENEYEAK	5	KHGRVVRADLKNEDNSSKELIGVVIMENEYE
PF3D7_1006800	GBP2	single-strand telomeric DNA-binding protein GBP2, putative	0.637994	-0.199338	0.438656	-0.0265102	-0.372166	0.332701	0.544611	PF3D7_1006800	206	S	___1	NEDNS(0.5)S(0.5)KELIGVVIMENEYEAK	6	HGRVVRADLKNEDNSSKELIGVVIMENEYEA
PF3D7_1000600	RIF	rifin	0.636473	-0.695778	-0.0593052	-0.63718	-0.754375	-0.24375	0.125139	PF3D7_1000600	73	S	___1	QT(0.5)S(0.5)QRFEEYEQR	3	DENMKSLKENFDRQTSQRFEEYEQRMIRKRK
PF3D7_1000600	RIF	rifin	0.636473	-0.695778	-0.0593052	-0.63718	-0.754375	-0.24375	0.125139	PF3D7_1000600	72	T	___1	QT(0.5)S(0.5)QRFEEYEQR	2	NDENMKSLKENFDRQTSQRFEEYEQRMIRKR
PF3D7_0220600		Plasmodium exported protein (hyp9), unknown function	0.635828	-0.474607	0.161221	-0.4457	-0.503515	0.1028	0.219641	PF3D7_0220600	130	S	___1	VNATS(0.001)ENMS(0.998)VGQWDYIMQYYGQSTPK	9	IPPDMIKVNATSENMSVGQWDYIMQYYGQST
PF3D7_0601900		conserved Plasmodium protein, unknown function	0.635717	3.263	3.89872	3.05994	3.46606	3.04615	4.75129	PF3D7_0601900	115	S	___1	S(0.002)HS(0.978)S(0.02)SSSVYASANAEN	3	ERKTSSSSRQAARSHSSSSSVYASANAEN__
PF3D7_0505000		conserved Plasmodium membrane protein, unknown function	0.633193	1.4787	2.11189	1.37777	1.57962	2.05663	2.16715	PF3D7_0505000	869	S	___1	NNMYGSDES(1)DKNIFTIIK	9	NTNEHNKNNMYGSDESDKNIFTIIKEKNEIE
PF3D7_0914900		BSD-domain protein, putative	0.632757	1.57317	2.20593	1.66084	1.4855	2.15638	2.25548	PF3D7_0914900	556	S	___2	FLDEIS(1)EANRS(1)ACDLEEPK	6	FQKISEYNTKFLDEISEANRSACDLEEPKSD
PF3D7_0914900		BSD-domain protein, putative	0.632757	1.57317	2.20593	1.66084	1.4855	2.15638	2.25548	PF3D7_0914900	561	S	___2	FLDEIS(1)EANRS(1)ACDLEEPK	11	EYNTKFLDEISEANRSACDLEEPKSDFFDSS
PF3D7_0905400	RhopH3	high molecular weight rhoptry protein 3	0.630337	0.374098	1.00443	0.344881	0.403315	0.93742	1.07145	PF3D7_0905400	736	S	___1	QDVLYETDKPQT(0.005)MDEAS(0.746)Y(0.223)EET(0.025)VDEDAHHVNEK	17	DVLYETDKPQTMDEASYEETVDEDAHHVNEK
PF3D7_1416600		conserved Plasmodium protein, unknown function	0.629848	-1.32937	-0.69952	-1.29328	-1.36546	-0.66835	-0.73069	PF3D7_1416600	2931	S	___1	KFS(0.098)PS(0.902)FGNINNEDIK	5	KSENCINNNIRKFSPSFGNINNEDIKNNNYK
PF3D7_0702500		Plasmodium exported protein, unknown function	0.628547	0.174713	0.80326	0.246861	0.102566	0.70286	0.90366	PF3D7_0702500	196	S	___1	NYS(0.001)LGNLS(0.958)T(0.03)GT(0.011)T(0.001)S(0.009)QGS(0.839)T(0.126)S(0.02)S(0.006)R	8	THDLPAGRNYSLGNLSTGTTSQGSTSSRHYS
PF3D7_0500800	MESA	mature parasite-infected erythrocyte surface antigen	0.628009	0.766182	1.39419	0.65407	0.878294	1.42167	1.36671	PF3D7_0500800	386	S	___1	LGENVNDGAS(1)ENS(1)EDPKK	13	GEKLGENVNDGASENSEDPKKLTEQEENGTK
PF3D7_0906600		zinc finger protein, putative	0.627773	-0.307447	0.320326	-0.24551	-0.369385	0.361441	0.279211	PF3D7_0906600	588	S	___1	CS(0.001)S(0.073)T(0.073)S(0.849)NLLT(0.004)DINCTNK	5	EETTSGEKFGRCSSTSNLLTDINCTNKQDTT
PF3D7_1303400	LisH	LisH domain-containing protein, putative	0.627743	1.19666	1.8244	1.23412	1.15919	1.79177	1.85703	PF3D7_1303400	864	S	___1	ES(0.117)DS(0.882)VY(0.001)DKEVEK	4	EFGDNICNLHNKESDSVYDKEVEKYGYNHDT
PF3D7_1313800		conserved Plasmodium membrane protein, unknown function	0.627103	-2.38806	-1.76095	-2.30271	-2.47341	-1.60054	-1.92137	PF3D7_1313800	1887	S	___1	KGS(0.628)T(0.186)S(0.186)NINMIGNLSPQTYIK	3	SNEQIVELNSKVRKGSTSNINMIGNLSPQTY
PF3D7_1033200	ETRAMP10.2	early transcribed membrane protein 10.2	0.626307	-0.537951	0.0883551	-0.547209	-0.528694	0.16733	0.00938034	PF3D7_1033200	193	S	___1	LAS(0.997)FS(0.003)LYDALADASEQNKNK	3	GNDSFKNINEPRKLASFSLYDALADASEQNK
PF3D7_1357100		elongation factor 1-alpha	0.625682	1.61274	2.23842	1.31689	1.90858	2.19187	2.28497	PF3D7_1357100;PF3D7_1357000	385;385	S	___1	SGDS(1)ALVSLEPK	4	GKVVEENPKAIKSGDSALVSLEPKKPMVVET
PF3D7_1412500	ACT2	actin II	0.624823	-0.576082	0.0487404	-0.69735	-0.454815	-0.0447292	0.14221	PF3D7_1412500	234	S	___1	S(0.015)EEHS(0.985)DEIEEIYELPDGNLITVGSER	5	IAMDYDEELKRSEEHSDEIEEIYELPDGNLI
PF3D7_0113200		Plasmodium exported protein, unknown function	0.624629	4.40467	5.0293	4.4879	4.32143	5.0705	4.98809	PF3D7_0113200	156	S	___1	REIS(1)LTVK	4	INKTQTNESNNKREISLTVKNQKNQTNKSKN
PF3D7_1132400		conserved Plasmodium membrane protein, unknown function	0.624018	-0.776213	-0.152195	-0.870319	-0.682106	-0.17931	-0.12508	PF3D7_1132400	1139	S	___1	NKS(1)DLYR	3	NNSFEYDDDIHKKNKSDLYRKEKNNVHTFNM
PF3D7_0810600	DBP1	ATP-dependent RNA helicase DBP1, putative	0.623933	-4.80469	-4.18075	-4.77971	-4.82967	-3.90347	-4.45804	PF3D7_0810600	75	S	___1	REMNHMVS(0.07)NS(0.909)NNGS(0.021)R	10	QIRNSKREMNHMVSNSNNGSRNYSVEHVNPN
PF3D7_0815800	VPS9	vacuolar protein sorting-associated protein 9, putative	0.622897	-2.93181	-2.30892	-2.96884	-2.89478	-2.47102	-2.14681	PF3D7_0815800	899	S	___1	NNIT(0.002)LDDGS(0.856)Y(0.142)EEQSCAR	9	LKDDKSKNNITLDDGSYEEQSCARKRSLENI
PF3D7_1127800		conserved Plasmodium protein, unknown function	0.621668	1.78595	2.40762	1.88289	1.689	2.34969	2.46554	PF3D7_1127800	359	T	___1	LYVVEQKDEENVT(1)NPDEFVTSER	13	LKKLYVVEQKDEENVTNPDEFVTSERTTDID
PF3D7_0405400	PRPF8	pre-mRNA-processing-splicing factor 8, putative	0.621492	1.39011	2.0116	1.43857	1.34164	2.0427	1.9805	PF3D7_0405400	888	S	___1	NKS(1)DDDDNYKGDDNNDNNNK	3	NPYNDDNYKGDDKNKSDDDDNYKGDDNNDNN
PF3D7_1416100	SEY1	protein SEY1, putative	0.621102	0.331358	0.95246	0.18453	0.478186	0.959251	0.945669	PF3D7_1416100	659	S	___1	NDDANLSKDENYNNKFS(0.82)FS(0.175)LT(0.005)NEK	17	DDANLSKDENYNNKFSFSLTNEKGIFQNINN
PF3D7_0932200	PFN	profilin	0.619068	-5.06754	-4.44847	-5.23887	-4.8962	-4.60777	-4.28917	PF3D7_0932200	6	S	___1	AEEY(0.026)S(0.966)WDS(0.008)YLNDR	5	__________MAEEYSWDSYLNDRLLATNQV
PF3D7_1140700		conserved Plasmodium protein, unknown function	0.617892	-0.822777	-0.204885	-0.793329	-0.852224	-0.16012	-0.249649	PF3D7_1140700	1109	S	___1	LTESEYDS(1)VYETLINR	8	IRKSYINKLTESEYDSVYETLINRYCKNTTN
PF3D7_1149000	Pf332	antigen 332, DBL-like protein	0.617553	1.47385	2.0914	1.47623	1.47146	2.03207	2.15073	PF3D7_1149000	275	S	___1	NSNNLKDLDS(0.965)NS(0.035)DKDGIVSESYK	10	EGAGNKNSNNLKDLDSNSDKDGIVSESYKAT
PF3D7_0202600.2-p1		conserved Plasmodium protein, unknown function	0.616282	-2.04134	-1.42505	-2.02234	-2.06034	-1.50801	-1.3421	PF3D7_0202600.2-p1;PF3D7_0202600	514;514	S	___1	NVDEIIDS(1)GVEGNCDVEEK	8	FFWDDKNKNVDEIIDSGVEGNCDVEEKLDKE
PF3D7_1436300	PTEX150	translocon component PTEX150	0.616106	0.913609	1.52971	0.899801	0.927416	1.50342	1.55601	PF3D7_1436300	549	S	___1	MS(0.002)VS(0.98)T(0.018)HNKK	4	SSSQFDNNKKNKMSVSTHNKKSKNLMDSLDL
PF3D7_1307800		fork head domain protein, putative	0.615627	0.0113478	0.626975	0.154341	-0.131645	0.70985	0.5441	PF3D7_1307800	253	S	___3	T(0.447)S(0.553)KDNS(0.996)Y(0.003)YDSK	6	ILKKSSEHTRTSKDNSYYDSKRKYRNITSED
PF3D7_0516400	PhLP1	phosducin-like protein, putative	0.614918	-3.55071	-2.93579	-3.28256	-3.81886	-2.93525	-2.93633	PF3D7_0516400	270	Y	___1	DNNS(0.093)DNY(0.907)DDEDELNKK	7	CHNNMYNSKDNNSDNYDDEDELNKKNIRTQK
PF3D7_1468700	eIF4A	eukaryotic initiation factor 4A	0.614412	-2.92074	-2.30633	-2.90008	-2.94141	-2.47038	-2.14228	PF3D7_1468700	47	S	___1	GIYS(0.077)YGFEKPS(0.923)AIQQR	11	EKLLRGIYSYGFEKPSAIQQRGIKPILNGYD
PF3D7_1136500.2-p1		casein kinase 1	0.614287	1.19693	1.81122	0.691961	1.7019	2.27248	1.34996	PF3D7_1136500.2-p1;PF3D7_1136500	17;17	S	___1	KLGS(0.98)GS(0.02)FGDIYVAK	4	EIRVANKYALGKKLGSGSFGDIYVAKDIVTM
PF3D7_1415400		conserved Plasmodium protein, unknown function	0.613927	2.60391	3.21784	2.75685	2.45098	3.1772	3.25848	PF3D7_1415400	682	S	___1	EYNNIYDEEDNKS(1)DKYR	13	YKKEYNNIYDEEDNKSDKYRNDRDVRDRRKG
PF3D7_0401800	PfD80	Plasmodium exported protein (PHISTb), unknown function	0.612943	0.287012	0.899955	0.24761	0.326414	0.92095	0.87896	PF3D7_0401800	133	S	___2	S(1)AS(1)AASTTR	1	TASTASTASAASTTRSASAASTTRSASAAST
PF3D7_1342900	ApiAP2	AP2 domain transcription factor, putative	0.612782	0.245703	0.858485	0.36842	0.122986	0.773071	0.943899	PF3D7_1342900	1831	S	___1	DFVGEYIS(1)DREER	8	KYTSMDNKDFVGEYISDREERYYDINILNDE
PF3D7_0219600	RFC1	replication factor C subunit 1, putative	0.612747	0.120793	0.733541	0.252121	-0.0105343	0.68317	0.783911	PF3D7_0219600	14	S	___1	NLFS(1)DDES(1)DDGRKK	8	__MSSKDKNLFSDDESDDGRKKKRLKKVSSS
PF3D7_1205800	HMGB3	high mobility group protein B3, putative	0.610538	-0.631662	-0.0211248	-0.470299	-0.793026	0.0797997	-0.122049	PF3D7_1205800	1877	T	___1	ENQHIYYDT(1)DLDKPER	9	FSQTIGKENQHIYYDTDLDKPERTLQDTEIV
PF3D7_0202000	KAHRP	knob-associated histidine-rich protein	0.610282	-1.83164	-1.22136	-1.71606	-1.94722	-0.96175	-1.48096	PF3D7_0202000	485	T	___1	KENET(0.001)KNT(0.999)AGENK	8	DGSKAHEKKENETKNTAGENKKVDSTSADNK
PF3D7_1021500	ROK1	ATP-dependent RNA helicase ROK1, putative	0.609622	-4.9158	-4.30617	-4.69392	-5.13768	-3.81622	-4.79613	PF3D7_1021500	98	S	___1	NIVPIRS(1)FHDIIEYLK	7	NVEYENINRNIVPIRSFHDIIEYLKIINNER
PF3D7_0716000		RNA-binding protein, putative	0.609017	-1.86793	-1.25891	-1.86202	-1.87384	-1.31026	-1.20757	PF3D7_0716000	113	S	___1	NNDNDDQDDEHNS(0.999)KY(0.001)NDCK	13	DNKNNDNDDQDDEHNSKYNDCKRKHKSNSKI
PF3D7_1442400	KIC9	conserved Plasmodium protein, unknown function	0.608487	1.73879	2.34727	1.78775	1.68983	2.26358	2.43097	PF3D7_1442400	325	S	___1	MYNLDFEEEKS(0.981)ES(0.019)NNLLLNYPHEEK	11	ELENRMYNLDFEEEKSESNNLLLNYPHEEKE
PF3D7_0702500		Plasmodium exported protein, unknown function	0.608478	1.73895	2.34743	1.74003	1.73787	2.28675	2.4081	PF3D7_0702500	151	S	___1	NNSDGST(0.001)ENHLS(0.972)GS(0.011)NS(0.016)DGR	12	QLYKNNSDGSTENHLSGSNSDGRNSSQHSVG
PF3D7_0500800	MESA	mature parasite-infected erythrocyte surface antigen	0.608427	2.66832	3.27675	2.54634	2.7903	3.05147	3.50203	PF3D7_0500800	383	S	___2	LGENVNDGAS(1)ENS(1)EDPKK	10	ENEGEKLGENVNDGASENSEDPKKLTEQEEN
PF3D7_0500800	MESA	mature parasite-infected erythrocyte surface antigen	0.608427	2.66832	3.27675	2.54634	2.7903	3.05147	3.50203	PF3D7_0500800	386	S	___2	LGENVNDGAS(1)ENS(1)EDPKK	13	GEKLGENVNDGASENSEDPKKLTEQEENGTK
PF3D7_0301600	GEXP21	Plasmodium exported protein (hyp1), unknown function	0.607613	-1.72301	-1.1154	-1.68918	-1.75685	-1.0004	-1.2304	PF3D7_0301600	606	S	___1	S(0.998)Y(0.002)ENEFNLSTDRR	1	PFKESKISTSSHSTRSYENEFNLSTDRRNSE
PF3D7_0424500	FIKK4.1	serine/threonine protein kinase, FIKK family	0.607237	4.40956	5.0168	4.41114	4.40799	4.99692	5.03668	PF3D7_0424500	523	S	___1	LKINDPYDYLKS(0.999)IT(0.001)NQEER	12	IHEKLKINDPYDYLKSITNQEERKSFYFNVS
PF3D7_0710600	RPL34	60S ribosomal protein L34	0.606928	-1.22885	-0.621924	-1.10796	-1.34974	-0.722559	-0.52129	PF3D7_0710600	79	S	___1	AYGGS(1)ICAR	5	RARRKNRTVARAYGGSICARCIRERIMRAFL
PF3D7_0702500		Plasmodium exported protein, unknown function	0.606112	-0.725482	-0.11937	-0.795469	-0.655495	-0.141809	-0.0969296	PF3D7_0702500	145	S	___2	NNS(1)DGS(0.961)T(0.039)ENHLSGSNSDGR	6	DGQKESQLYKNNSDGSTENHLSGSNSDGRNS
PF3D7_0916700	HoMu	RNA-binding protein musashi, putative	0.605323	0.605533	1.21086	0.730431	0.480635	1.20128	1.22043	PF3D7_0916700	18	S	___1	TSEENINYNS(0.001)NNS(0.999)NENS(1)VQDK	17	SEENINYNSNNSNENSVQDKKSVEEHNIDDK
PF3D7_1149000	Pf332	antigen 332, DBL-like protein	0.605313	-1.32883	-0.723515	-1.34351	-1.31415	-0.946699	-0.50033	PF3D7_1149000	437	S	___1	IS(1)IETSEIDRDKEPFR	2	IKPTYEENDEDKSKISIETSEIDRDKEPFRI
PF3D7_1351400		60S ribosomal protein L17, putative	0.604858	-2.29653	-1.69167	-2.29105	-2.30202	-1.81809	-1.56526	PF3D7_1351400	160	S	___2	KS(1)LLS(1)NAEK	2	HIQIIAREINKPAKKSLLSNAEKQKKLPFKV
PF3D7_1351400		60S ribosomal protein L17, putative	0.604858	-2.29653	-1.69167	-2.29105	-2.30202	-1.81809	-1.56526	PF3D7_1351400	163	S	___2	KS(1)LLS(1)NAEK	5	IIAREINKPAKKSLLSNAEKQKKLPFKVTLK
PF3D7_0617200		conserved Plasmodium protein, unknown function	0.602842	0.162152	0.764995	0.22497	0.0993347	0.71122	0.818769	PF3D7_0617200	79	S	___1	S(1)ILDDIEKK	1	DCFQSDIDKLENERRSILDDIEKKQKHKKEL
PF3D7_1149000	Pf332	antigen 332, DBL-like protein	0.602363	-0.168217	0.434146	-0.105999	-0.230434	0.399761	0.468531	PF3D7_1149000	1449	S	___1	ASVNDEKVEVAS(0.999)IT(0.001)EEVEEEEK	12	VAQRASVNDEKVEVASITEEVEEEEKSVSEE
PF3D7_1303400	LisH	LisH domain-containing protein, putative	0.602178	-1.39458	-0.792405	-1.28517	-1.504	-0.66213	-0.92268	PF3D7_1303400	706	S	___1	EHSHSISYISS(0.002)LENS(0.998)PDKLK	15	KEHSHSISYISSLENSPDKLKGQKQNDTNEV
PF3D7_0623100	NAB2	nuclear polyadenylated RNA-binding protein NAB2, putative	0.602048	2.27612	2.87817	2.38698	2.16525	2.94433	2.812	PF3D7_0623100	203	S	___1	GKDS(1)DMFR	4	DKNKSRNKRSDRGKDSDMFRLRDKYRRLGKS
PF3D7_1120100	PGM1	phosphoglycerate mutase, putative	0.600798	-2.65225	-2.05145	-2.65475	-2.64974	-2.04554	-2.05736	PF3D7_1120100	23	T	___1	FT(0.792)GWT(0.197)DVPLS(0.011)EKGEEEAIAAGK	2	LLRHGESTWNKENKFTGWTDVPLSEKGEEEA
PF3D7_1002400.2-p1		RNA-binding protein, putative	0.600783	1.77558	2.37637	1.76658	1.78458	2.26899	2.48374	PF3D7_1002400.2-p1;PF3D7_1002400	8;8	S	___1	EAHS(1)ES(1)EEPVHK	4	________MSSKEAHSESEEPVHKNDGSTLY
PF3D7_0905800		conserved Plasmodium protein, unknown function	0.600358	-0.961567	-0.361209	-0.845909	-1.07722	-0.477749	-0.244669	PF3D7_0905800	152	S	___2	LNSILPQDNS(1)DDNK	10	NNNNNKLNSILPQDNSDDNKSINICEDGNIN
PF3D7_0905800		conserved Plasmodium protein, unknown function	0.600358	-0.961567	-0.361209	-0.845909	-1.07722	-0.477749	-0.244669	PF3D7_0905800	157	S	___2	LNS(0.009)ILPQDNS(0.995)DDNKS(0.995)INICEDGNINNENKK	15	KLNSILPQDNSDDNKSINICEDGNINNENKK
PF3D7_0801800		mannose-6-phosphate isomerase, putative	0.600142	-0.864388	-0.264245	-0.6961	-1.03267	-0.27379	-0.2547	PF3D7_0801800	196	S	___2	KFS(0.642)T(0.784)KS(0.574)EDIINK	3	KVENTKNKYMNKKKFSTKSEDIINKNNNTTK
PF3D7_0801800		mannose-6-phosphate isomerase, putative	0.600142	-0.864388	-0.264245	-0.6961	-1.03267	-0.27379	-0.2547	PF3D7_0801800	199	S	___2	S(1)EDIINK	1	NTKNKYMNKKKFSTKSEDIINKNNNTTKGST
PF3D7_0801800		mannose-6-phosphate isomerase, putative	0.600142	-0.864388	-0.264245	-0.6961	-1.03267	-0.27379	-0.2547	PF3D7_0801800	197	T	___2	KFS(0.642)T(0.784)KS(0.574)EDIINK	4	VENTKNKYMNKKKFSTKSEDIINKNNNTTKG
PF3D7_0409800		zinc finger protein, putative	0.599992	1.8777	2.47769	1.92557	1.82982	2.51046	2.44492	PF3D7_0409800	117	S	___1	S(1)EWHKYNLK	1	NIQIYNYSFFRYHFKSEWHKYNLKRKLLNLH
PF3D7_0106100		V-type proton ATPase subunit C, putative	0.599652	-0.963417	-0.363765	-1.13355	-0.793285	-0.14814	-0.57939	PF3D7_0106100	262	S	___1	S(1)FKYDEK	1	EDFKKEAKVKKFVVKSFKYDEKQYNDMMESR
PF3D7_0818000	SNRNP27	conserved protein, unknown function	0.598828	1.72873	2.32756	1.82362	1.63383	2.35204	2.30307	PF3D7_0818000	316	S	___1	NNDILNDNILNEELS(1)EGEMIKR	15	KNNDILNDNILNEELSEGEMIKRIMGISEFS
PF3D7_1027300	nPrx	peroxiredoxin	0.598759	1.04262	1.64138	0.79439	1.29084	1.71506	1.56769	PF3D7_1027300	143	S	___1	KS(0.001)VS(0.999)PGK	4	VLKNDFTVSYVKKSVSPGKSATQVLNFLVNG
PF3D7_1129500		A/G-specific adenine glycosylase, putative	0.597473	-3.99855	-3.40108	-3.70948	-4.28763	-3.26566	-3.5365	PF3D7_1129500	125	S	___1	EHNELS(1)LER	6	KGTKIMKIKKEHNELSLERCKRLKKEDKDEE
PF3D7_0708400	HSP90	heat shock protein 90	0.597423	2.66189	3.25932	2.6839	2.63988	3.23648	3.28215	PF3D7_0708400	220	S	___1	QNEKEIT(1)AS(1)EEEEGEGEGEREGEEEEEK	9	IKLYCERQNEKEITASEEEEGEGEGEREGEE
PF3D7_1473700	NUP116	nucleoporin NUP116/NSP116, putative	0.597353	1.53198	2.12933	1.59045	1.47351	2.16952	2.08914	PF3D7_1473700	6	S	___1	LS(1)NVITSNK	2	__________MSRKLSNVITSNKGNSMELFV
PF3D7_0912600		conserved Plasmodium protein, unknown function	0.595782	-1.97091	-1.37513	-1.90025	-2.04157	-1.2768	-1.47346	PF3D7_0912600	667	S	___1	S(0.103)KS(0.859)DS(0.038)LLDFLK	3	KEKDEIFQKCLLRSKSDSLLDFLKMSKLKKT
PF3D7_1409900	CDS	cytidine diphosphate-diacylglycerol synthase	0.595563	-1.86632	-1.27075	-1.809	-1.92364	-1.23284	-1.30867	PF3D7_1409900	60	S	___1	S(0.002)LDDS(0.998)NGGIENMDK	5	GDIIKRRSKSKSLDDSNGGIENMDKVKVSNN
PF3D7_1336800	NUDC	nuclear movement protein, putative	0.595428	0.0444031	0.639831	0.0253716	0.0634346	0.543751	0.73591	PF3D7_1336800	326	S	___1	MEDLDAET(0.038)RS(0.962)VVEK	10	VPENSRMEDLDAETRSVVEKMIYDQKQKAMN
PF3D7_1416600		conserved Plasmodium protein, unknown function	0.595212	-2.94524	-2.35003	-2.96236	-2.92811	-2.3605	-2.33955	PF3D7_1416600	731	S	___1	IVT(0.002)HEFGS(0.998)DKEK	8	NKFIDKNKIVTHEFGSDKEKYIEQNEPSIYN
PF3D7_0113200		Plasmodium exported protein, unknown function	0.595058	-0.436937	0.158121	-0.42436	-0.449514	0.156921	0.159321	PF3D7_0113200	367	Y	___1	SENENDDES(0.283)DY(0.717)DDDEELQGHSVVYNDK	11	NNQHRSENENDDESDYDDDEELQGHSVVYND
PF3D7_0629400	PABP3	RNA-binding protein, putative	0.594792	-2.65052	-2.05573	-2.6226	-2.67844	-1.96653	-2.14493	PF3D7_0629400	627	S	___1	MNDCT(0.002)YMS(0.96)DMS(0.031)T(0.007)IYSENNR	8	DESILNCKMNDCTYMSDMSTIYSENNRNNMN
PF3D7_1347500	ALBA4	DNA/RNA-binding protein Alba 4	0.594648	-0.481647	0.113001	-0.48205	-0.481245	0.154011	0.071991	PF3D7_1347500	114	S	___1	IS(1)PGYVSFHEK	2	KIYMEKHPEFKGSRISPGYVSFHEKTDSFTP
PF3D7_1027300	nPrx	peroxiredoxin	0.592323	-0.502282	0.0900412	-0.536699	-0.467865	0.0259914	0.154091	PF3D7_1027300	205	T	___1	T(0.712)ADT(0.288)DKEKPK	1	VQGEGEGEGEGDEEKTADTDKEKPKKSSTST
PF3D7_0916700	HoMu	RNA-binding protein musashi, putative	0.592298	1.08056	1.67286	1.12075	1.04037	1.61704	1.72868	PF3D7_0916700	24	S	___2	S(1)VEEHNIDDKS(1)LRDEDNK	1	YNSNNSNENSVQDKKSVEEHNIDDKSLRDED
PF3D7_0916700	HoMu	RNA-binding protein musashi, putative	0.592298	1.08056	1.67286	1.12075	1.04037	1.61704	1.72868	PF3D7_0916700	34	S	___2	SVEEHNIDDKS(1)LRDEDNK	11	VQDKKSVEEHNIDDKSLRDEDNKSIKEGNNN
PF3D7_1362700		conserved Plasmodium protein, unknown function	0.592153	-1.0363	-0.444144	-0.926119	-1.14647	-0.487259	-0.40103	PF3D7_1362700	309	S	___1	ETEYGQNKDVHVFEES(0.952)VRDY(0.001)T(0.048)NNYIK	16	ETEYGQNKDVHVFEESVRDYTNNYIKERKKY
PF3D7_1354300		large subunit rRNA methyltransferase, putative	0.591938	-2.28522	-1.69328	-2.50544	-2.065	-1.67863	-1.70794	PF3D7_1354300	247	S	___1	QESYLDNNENYFS(1)DEESNDEEKVGEK	13	ETKQESYLDNNENYFSDEESNDEEKVGEKID
PF3D7_0406500		NYN domain-containing protein, putative	0.590963	1.07323	1.66419	1.13987	1.00658	1.62498	1.7034	PF3D7_0406500	2618	S	___1	NVEMDDKEELITNEQS(0.999)NNES(0.001)SPNK	16	NVEMDDKEELITNEQSNNESSPNKKKNKKKN
PF3D7_1036900		conserved Plasmodium protein, unknown function	0.590192	2.99125	3.58144	3.02225	2.96025	3.51036	3.65252	PF3D7_1036900	541	T	___1	LNYDMT(0.098)T(0.902)IT(1)EETNEFDHDVNKK	9	DPYTGQKLNYDMTTITEETNEFDHDVNKKVI
PF3D7_0807800	RPN10	26S proteasome regulatory subunit RPN10, putative	0.588778	-0.432133	0.156645	-0.32468	-0.539585	0.2605	0.0527897	PF3D7_0807800	474	S	___1	EGDS(1)DKEK	4	KINPNVNVFDKKEGDSDKEKNKE________
PF3D7_0402100		Plasmodium exported protein (PHISTb), unknown function	0.588727	-0.980477	-0.39175	-0.999439	-0.961515	-0.55295	-0.230551	PF3D7_0402100	121	S	___2	QHDENNFS(0.944)DKS(0.528)GS(0.528)MVLNEK	8	KTLFNNVRQHDENNFSDKSGSMVLNEKDIQL
PF3D7_0402100		Plasmodium exported protein (PHISTb), unknown function	0.588727	-0.980477	-0.39175	-0.999439	-0.961515	-0.55295	-0.230551	PF3D7_0402100	124	S	___2	QHDENNFS(0.008)DKS(0.952)GS(0.039)MVLNEK	11	FNNVRQHDENNFSDKSGSMVLNEKDIQLEKK
PF3D7_0402100		Plasmodium exported protein (PHISTb), unknown function	0.588727	-0.980477	-0.39175	-0.999439	-0.961515	-0.55295	-0.230551	PF3D7_0402100	126	S	___2	S(0.002)GS(0.998)MVLNEK	3	NVRQHDENNFSDKSGSMVLNEKDIQLEKKIE
PF3D7_1335400	RH2a	reticulocyte binding protein 2 homologue a;reticulocyte binding protein 2 homologue b	0.588168	1.8784	2.46657	1.86414	1.89266	2.58035	2.35279	PF3D7_1335400;PF3D7_1335300	1254;1254	S	___1	KS(1)DTIK	2	LIDDICEQITNEAKKSDTIKEKIESYKKDID
PF3D7_0808300		ubiquitin regulatory protein, putative	0.587623	5.10488	5.6925	5.18766	5.02209	5.6919	5.6931	PF3D7_0808300	8	S	___1	S(0.001)LS(0.999)DLKK	3	________MSNIRSLSDLKKDDKKNNERVAH
PF3D7_1334300	MSRP5	MSP7-like protein	0.587583	3.11058	3.69816	3.19543	3.02572	3.64956	3.74676	PF3D7_1334300	303	S	___1	S(0.003)NS(0.968)T(0.029)SNQLITQLQSEK	3	GNTPTKLSTQNTKSNSTSNQLITQLQSEKSS
PF3D7_1334700	MSRP7	MSP7-like protein	0.587553	0.225567	0.81312	0.16029	0.290844	0.77932	0.84692	PF3D7_1334700	179	T	___1	GT(0.5)S(0.5)QNDSDYLHSVYDK	2	ALCGHTKDNHNNLRGTSQNDSDYLHSVYDKA
PF3D7_1307800		fork head domain protein, putative	0.587302	-0.336367	0.250936	-0.226559	-0.446175	0.31912	0.182751	PF3D7_1307800	246	T	___3	S(0.235)S(0.262)EHT(0.512)RT(0.495)S(0.495)KDNS(0.991)Y(0.008)Y(0.002)DSK	5	KQMDKIYILKKSSEHTRTSKDNSYYDSKRKY
PF3D7_1340200		conserved Plasmodium protein, unknown function	0.587078	1.01249	1.59957	1.24918	0.775795	1.81869	1.38044	PF3D7_1340200	56	S	___1	KELGEYHKY(0.008)Y(0.075)S(0.917)DN	11	YRDVKKELGEYHKYYSDN_____________
PF3D7_1407100	NOP1	rRNA 2'-O-methyltransferase fibrillarin, putative	0.586839	-0.888118	-0.301279	-0.85446	-0.921776	-0.341839	-0.260719	PF3D7_1407100	131	T	___1	RYEVMT(1)EDEKIEYR	6	VPGESVYGEKRYEVMTEDEKIEYRVWNPFRS
PF3D7_0729100		conserved Plasmodium protein, unknown function	0.586762	0.381078	0.96784	0.482351	0.279804	1.00028	0.9354	PF3D7_0729100	1073	S	___2	IQNMEEHEYIPCAS(0.884)NKS(0.895)IS(0.101)NNY(0.121)HVLSK	14	ERIQNMEEHEYIPCASNKSISNNYHVLSKSE
PF3D7_0729100		conserved Plasmodium protein, unknown function	0.586762	0.381078	0.96784	0.482351	0.279804	1.00028	0.9354	PF3D7_0729100	1076	S	___2	IQNMEEHEYIPCAS(0.884)NKS(0.895)IS(0.101)NNY(0.121)HVLSK	17	QNMEEHEYIPCASNKSISNNYHVLSKSEYDK
PF3D7_0711500		regulator of chromosome condensation, putative	0.586613	-0.959392	-0.372779	-0.960999	-0.957785	-0.365269	-0.380289	PF3D7_0711500	667	S	___1	VKS(0.99)VGS(0.01)R	3	NLKEAQSPSGKRKVKSVGSRRESLSAPISKK
PF3D7_1438400	MCA2	metacaspase-like protein	0.586438	1.68553	2.27197	1.71556	1.65549	2.20435	2.33958	PF3D7_1438400	499	S	___1	LQVIEDKEKNS(1)NR	11	KKKQKLQVIEDKEKNSNRAVVMPLKNKIIYI
PF3D7_1342000		40S ribosomal protein S6	0.586133	-1.40288	-0.816745	-1.4333	-1.37246	-0.94577	-0.687719	PF3D7_1342000	150	S	___1	LFNLDKS(1)DDVRK	7	PKRASKIRKLFNLDKSDDVRKYVIGRAITKN
PF3D7_1349200		glutamate--tRNA ligase, putative	0.585993	-1.65252	-1.06652	-1.65427	-1.65076	-1.29486	-0.83819	PF3D7_1349200	428	S	___1	NNS(1)IEKNLELFNEMR	3	RNQRGEGIESINRNNSIEKNLELFNEMRKGT
PF3D7_0202000	KAHRP	knob-associated histidine-rich protein	0.585742	6.88453	7.47027	6.90331	6.86575	7.44496	7.49558	PF3D7_0202000	403	S	___1	KHKDNEDAES(1)VK	10	EKKKSKKHKDNEDAESVKSKKHKSHDCEKKK
PF3D7_1033200	ETRAMP10.2	early transcribed membrane protein 10.2	0.585397	4.11329	4.69868	4.2366	3.98997	4.79682	4.60055	PF3D7_1033200	255	S	___1	NS(0.001)S(0.999)EDKPTSESK	3	DMDPLNPYGSSKRNSSEDKPTSESKGTTPES
PF3D7_0401800	PfD80	Plasmodium exported protein (PHISTb), unknown function	0.585103	-1.35127	-0.76617	-1.29669	-1.40586	-0.88884	-0.643499	PF3D7_0401800	375	T	___1	T(0.922)FS(0.078)KELSK	1	YDEHEAKKHASDRTKTFSKELSKLFKKLRTK
PF3D7_1115800		conserved Plasmodium protein, unknown function	0.585082	-2.75599	-2.17091	-2.91534	-2.59663	-2.23659	-2.10522	PF3D7_1115800	165	S	___2	T(0.123)T(0.156)S(0.713)NVS(0.937)T(0.071)NNTTNDHAR	3	NFKKPTGGEATIKTTSNVSTNNTTNDHARKT
PF3D7_1244100		N-alpha-acetyltransferase 15, NatA auxiliary subunit, putative	0.584566	-0.115767	0.4688	0.0122414	-0.243774	0.43425	0.503349	PF3D7_1244100	688	S	___1	NDKVDEEEDDDENIPS(1)ELNDKDLEK	16	NDKVDEEEDDDENIPSELNDKDLEKLIEKNV
PF3D7_0730300	ApiAP2	AP2 domain transcription factor AP2-L, putative	0.583158	-1.73438	-1.15122	-1.7008	-1.76796	-1.20248	-1.09996	PF3D7_0730300	891	S	___1	CNQDS(0.022)YS(0.808)T(0.17)NEEPLS(0.001)NHSINDPGK	7	NNKNHIENRCNQDSYSTNEEPLSNHSINDPG
PF3D7_1149100.2-p1		Plasmodium exported protein, unknown function	0.581923	-0.310633	0.271291	-0.25469	-0.366575	0.182051	0.360531	PF3D7_1149100.2-p1;PF3D7_1149100	185;186	S	___1	TETQEESLNKEVVEGCS(0.861)T(0.139)GMCPLKNNDTK	17	ETQEESLNKEVVEGCSTGMCPLKNNDTKKEN
PF3D7_0808300		ubiquitin regulatory protein, putative	0.580821	4.7491	5.32992	4.76533	4.73288	5.28101	5.37884	PF3D7_0808300	37	S	___1	SGLEVQNS(1)DDDFVQNLFK	8	AHYTGGQKSGLEVQNSDDDFVQNLFKSKLPE
PF3D7_0401800	PfD80	Plasmodium exported protein (PHISTb), unknown function	0.580217	5.30359	5.88381	5.40305	5.20412	5.73599	6.03162	PF3D7_0401800	65	S	___2	SSSCSS(1)LASTTK	6	EEKAEDDYKKSSSCSSLASTTKRSPSTASTS
PF3D7_1110900		ES2 protein, putative	0.580127	-0.494226	0.0859003	-0.494719	-0.493734	0.106041	0.0657597	PF3D7_1110900	429	T	___1	NNDNYEYVNT(1)PLIQAGK	10	KFNLLKNNDNYEYVNTPLIQAGKGVDQSPII
PF3D7_0401800	PfD80	Plasmodium exported protein (PHISTb), unknown function	0.580028	4.90175	5.48178	4.96892	4.83459	5.33865	5.62491	PF3D7_0401800	68	S	___2	SSSCS(0.034)S(0.966)LAS(0.971)T(0.025)T(0.004)K	9	AEDDYKKSSSCSSLASTTKRSPSTASTSTSL
PF3D7_0402100		Plasmodium exported protein (PHISTb), unknown function	0.577478	3.25259	3.83007	3.28109	3.22408	3.77978	3.88035	PF3D7_0402100	94	S	___2	QVPKEES(1)ENS(1)NNDIFEYYK	7	NYGEGSLLKQVPKEESENSNNDIFEYYKTLF
PF3D7_0402100		Plasmodium exported protein (PHISTb), unknown function	0.577478	3.25259	3.83007	3.28109	3.22408	3.77978	3.88035	PF3D7_0402100	97	S	___2	QVPKEES(1)ENS(1)NNDIFEYYK	10	EGSLLKQVPKEESENSNNDIFEYYKTLFNNV
PF3D7_1416600		conserved Plasmodium protein, unknown function	0.576428	-1.35748	-0.781054	-1.29982	-1.41515	-0.765949	-0.79616	PF3D7_1416600	2179	S	___1	SYNS(0.999)EDLLY(0.001)K	4	NYKKCSDTIKGKSYNSEDLLYKGNFYKNVRR
PF3D7_0921600		tetratricopeptide repeat protein, putative	0.576408	-2.6007	-2.02429	-2.62586	-2.57553	-1.97957	-2.06901	PF3D7_0921600	1619	S	___1	NIINVEEENS(0.991)S(0.991)FEES(0.018)R	10	PTPSNKNIINVEEENSSFEESRNYESSDNSS
PF3D7_0202000	KAHRP	knob-associated histidine-rich protein	0.575832	3.94721	4.52304	3.89736	3.99706	4.48245	4.56363	PF3D7_0202000	603	S	___1	GAS(0.967)T(0.031)T(0.001)AGS(0.998)T(0.001)TGATTGANAVQSK	8	STTEGATKGASTTAGSTTGATTGANAVQSKD
PF3D7_1409900	CDS	cytidine diphosphate-diacylglycerol synthase	0.575422	-2.55003	-1.9746	-2.54502	-2.55503	-1.91219	-2.03702	PF3D7_1409900	39	S	___2	KS(0.002)T(0.002)ES(0.112)S(0.869)T(0.015)VDEKGDIIK	6	DKVLDDKKRKKSTESSTVDEKGDIIKRRSKS
PF3D7_1409900	CDS	cytidine diphosphate-diacylglycerol synthase	0.575422	-2.55003	-1.9746	-2.54502	-2.55503	-1.91219	-2.03702	PF3D7_1409900	40	T	___2	S(0.044)T(0.044)ES(0.638)S(0.638)T(0.638)VDEKGDIIK	6	KVLDDKKRKKSTESSTVDEKGDIIKRRSKSK
PF3D7_1026600		conserved Plasmodium protein, unknown function	0.574862	1.46122	2.03608	1.55017	1.37226	1.99438	2.07778	PF3D7_1026600	1279	S	___1	S(1)DEEEKINDLK	1	STSIISDGKIDSIHKSDEEEKINDLKEDSNV
PF3D7_1138700	KIC5	conserved Plasmodium protein, unknown function	0.574733	-1.37308	-0.798349	-1.18237	-1.5638	-0.713339	-0.88336	PF3D7_1138700	1591	S	___1	T(0.002)Y(0.001)KLDT(0.236)S(0.761)NVTK	7	HSSMTNKQKTYKLDTSNVTKDISSTDNNNNN
PF3D7_0619000		conserved protein, unknown function	0.574078	-1.03752	-0.463445	-0.922899	-1.15215	-0.563799	-0.363091	PF3D7_0619000;PF3D7_0619000.2-p1	883;884	S	___1	ILS(1)NELK	3	IFGEQINECFLHKILSNELKDPYFYAYFFDA
PF3D7_0916400		conserved Plasmodium protein, unknown function	0.573858	1.32991	1.90377	1.2717	1.38812	1.9635	1.84404	PF3D7_0916400	1894	S	___1	S(0.975)MFY(0.025)FKNK	1	MNKKEKLFVNSNTKKSMFYFKNKYVSLIYKH
PF3D7_1426000	RPL21	60S ribosomal protein L21	0.573602	-2.64161	-2.06801	-2.79142	-2.49181	-2.24172	-1.8943	PF3D7_1426000	47	S	___1	LNYGDYVDIVCDS(0.5)T(0.5)QQK	13	LEKLNYGDYVDIVCDSTQQKGMPFNYYHGKT
PF3D7_1426000	RPL21	60S ribosomal protein L21	0.573602	-2.64161	-2.06801	-2.79142	-2.49181	-2.24172	-1.8943	PF3D7_1426000	48	T	___1	LNYGDYVDIVCDS(0.5)T(0.5)QQK	14	EKLNYGDYVDIVCDSTQQKGMPFNYYHGKTG
PF3D7_1149000	Pf332	antigen 332, DBL-like protein	0.572068	-1.40861	-0.836539	-1.23653	-1.58068	-0.892029	-0.78105	PF3D7_1149000	1491	S	___1	GSSTEVVVEEQGS(0.5)VT(0.5)ENLLEEESASQGIVEK	13	VVKGSSTEVVVEEQGSVTENLLEEESASQGI
PF3D7_1149000	Pf332	antigen 332, DBL-like protein	0.572068	-1.40861	-0.836539	-1.23653	-1.58068	-0.892029	-0.78105	PF3D7_1149000	1493	T	___1	GSSTEVVVEEQGS(0.5)VT(0.5)ENLLEEESASQGIVEK	15	KGSSTEVVVEEQGSVTENLLEEESASQGIVE
PF3D7_1343000	PMT	phosphoethanolamine N-methyltransferase	0.571282	0.350793	0.922075	0.502451	0.199135	1.05361	0.790541	PF3D7_1343000	12	T	___1	T(0.006)LIENLNS(0.331)DKT(0.63)FLENNQY(0.025)T(0.008)DEGVK	11	____MTLIENLNSDKTFLENNQYTDEGVKVY
PF3D7_1219600	ATPase2	aminophospholipid-transporting P-ATPase	0.571017	-0.253907	0.31711	-0.356249	-0.151566	0.32073	0.31349	PF3D7_1219600	621	S	___1	EIS(1)S(1)RVIS(0.966)FKDS(0.034)K	3	SSSLGIISNAPKREISSRVISFKDSKEKNYI
PF3D7_1332400		nucleotidyltransferase, putative	0.570539	-0.585683	-0.0151443	-0.44433	-0.727036	-0.0772285	0.0469398	PF3D7_1332400	294	S	___1	YS(0.027)KDS(0.973)NNIIIEGSGYNMK	5	KNINETCYSNKYSKDSNNIIIEGSGYNMKKK
PF3D7_0313000		conserved Plasmodium protein, unknown function	0.569464	1.9291	2.49856	1.91506	1.94313	2.55359	2.44353	PF3D7_0313000	153	S	___1	LT(0.087)S(0.913)YNECPVDLYR	3	KNVEGEKKNTYKKLTSYNECPVDLYRDNNKT
PF3D7_1423200	CYP52	peptidyl-prolyl cis-trans isomerase	0.568937	-4.16281	-3.59387	-3.98015	-4.34548	-3.68689	-3.50086	PF3D7_1423200	2	S	___1	S(0.923)EVY(0.068)S(0.009)IEPK	1	______________MSEVYSIEPKTHGKVII
PF3D7_1212700	EIF3A	eukaryotic translation initiation factor 3 subunit A, putative	0.568452	-0.567167	0.0012846	-0.59688	-0.537455	-0.00325012	0.00581932	PF3D7_1212700	1284	T	___1	AKHET(0.959)S(0.04)EENT(0.002)K	5	AWNLKEDDDSKAKHETSEENTKSWRNNNKVI
PF3D7_0104800	NPT1	novel putative transporter 1, putative	0.567178	0.050313	0.617491	-0.134779	0.235405	0.792391	0.442591	PF3D7_0104800	357	S	___1	DKS(0.197)IDS(0.803)NK	6	KISDQSTVKKDKSIDSNKNILHDEEDFHKKS
PF3D7_0606000	KIC1	conserved Plasmodium protein, unknown function	0.567068	-3.29879	-2.73172	-3.21668	-3.38089	-2.81445	-2.64899	PF3D7_0606000	346	S	___1	KFITFNTFDNHS(1)EGS(1)VIFPMEK	15	KKFITFNTFDNHSEGSVIFPMEKYRNFTLPS
PF3D7_0812700	SNRPC	U1 small nuclear ribonucleoprotein C, putative	0.565942	1.33156	1.8975	1.36768	1.29543	2.03755	1.75745	PF3D7_0812700	232	S	___1	KPSFLNPENSKEHIES(1)DIS(1)	16	KPSFLNPENSKEHIESDIS____________
PF3D7_0106300	ATP6	calcium-transporting ATPase	0.565866	-1.43216	-0.86629	-1.65208	-1.21223	-0.80537	-0.92721	PF3D7_0106300	492	S	___2	GS(1)KILEDK	2	LKEMKSNENTIISRGSKILEDKINKYCYSEY
PF3D7_0319600	EF-1delta	elongation factor 1-delta, putative	0.565758	-1.83227	-1.26651	-1.89493	-1.76962	-1.29682	-1.23621	PF3D7_0319600	44	S	___1	S(0.5)S(0.5)LIIDIKPYGENTDLDEVLK	1	QANTKKPKKKEVINKSSLIIDIKPYGENTDL
PF3D7_0319600	EF-1delta	elongation factor 1-delta, putative	0.565758	-1.83227	-1.26651	-1.89493	-1.76962	-1.29682	-1.23621	PF3D7_0319600	45	S	___1	S(0.5)S(0.5)LIIDIKPYGENTDLDEVLK	2	ANTKKPKKKEVINKSSLIIDIKPYGENTDLD
PF3D7_1340900	PiT	sodium-dependent phosphate transporter	0.565578	-1.73725	-1.17167	-1.91416	-1.56034	-1.18217	-1.16118	PF3D7_1340900	375	S	___1	DNGS(0.994)EDKS(0.006)HENMLK	4	GSVEAHHVVHIKDNGSEDKSHENMLKKNLDK
PF3D7_0922500	PGK	phosphoglycerate kinase	0.565263	-0.870373	-0.30511	-0.87604	-0.864706	-0.28985	-0.32037	PF3D7_0922500	173	S	___1	AHS(0.5)S(0.5)MVGVK	3	DVFINDAFGTAHRAHSSMVGVKLNVKASGFL
PF3D7_0922500	PGK	phosphoglycerate kinase	0.565263	-0.870373	-0.30511	-0.87604	-0.864706	-0.28985	-0.32037	PF3D7_0922500	174	S	___1	AHS(0.5)S(0.5)MVGVK	4	VFINDAFGTAHRAHSSMVGVKLNVKASGFLM
PF3D7_0113000	GARP	glutamic acid-rich protein	0.564963	-1.06883	-0.503864	-1.11998	-1.01768	-0.667139	-0.34059	PF3D7_0113000	227	S	___1	EQGGCGIIS(0.382)S(0.618)VHETSNDTK	10	SPYQYREQGGCGIISSVHETSNDTKDNDKEN
PF3D7_0201800	KAHsp40	knob associated heat shock protein 40	0.564808	-2.52323	-1.95842	-2.37117	-2.67529	-1.97991	-1.93694	PF3D7_0201800	144	S	___1	SISEAYEVLS(1)DEEKR	10	ADNMFKSISEAYEVLSDEEKRDIYDKYGEEG
PF3D7_0532300		Plasmodium exported protein (PHISTb), unknown function	0.564792	2.90376	3.46855	2.96212	2.84541	3.47349	3.46362	PF3D7_0532300	459	S	___1	LAENQVEKEFQEVNERFS(1)EVAK	18	ENQVEKEFQEVNERFSEVAKRFKLTEKTVNF
PF3D7_0706500		conserved Plasmodium protein, unknown function	0.564692	1.60068	2.16538	1.78506	1.41631	2.11695	2.2138	PF3D7_0706500	728	S	___1	ADDKVLS(1)NEEVEK	7	QNIDMHEPKADDKVLSNEEVEKNIDRDKNVD
PF3D7_1149000	Pf332	antigen 332, DBL-like protein	0.564532	1.27819	1.84272	1.26772	1.28865	1.8591	1.82634	PF3D7_1149000	142	S	___1	ENGLDVCKS(1)QCEER	9	KDETFSRENGLDVCKSQCEERSRDDTEDQFL
PF3D7_0210900		conserved Plasmodium protein, unknown function	0.564377	-0.632262	-0.0678854	-0.494719	-0.769806	-0.0268803	-0.108891	PF3D7_0210900	13	S	___1	IMDYLS(1)CPLDDVVDREK	6	___MKEKNEKIMDYLSCPLDDVVDREKKSGK
PF3D7_0218500	SNRPD2	small nuclear ribonucleoprotein Sm D2, putative	0.564282	-1.15422	-0.589934	-1.18123	-1.1272	-0.543869	-0.636	PF3D7_0218500	3	S	___1	MKS(1)EVT(1)IEENRDNPEDGPLGLLSECVK	3	_____________MKSEVTIEENRDNPEDGP
PF3D7_1120100	PGM1	phosphoglycerate mutase, putative	0.564168	-0.595468	-0.0312996	-0.457729	-0.733206	0.0571499	-0.119749	PF3D7_1120100	92	Y	___1	HY(1)GSLQGLNK	2	LHVPVVKTWRLNERHYGSLQGLNKSETAKKY
PF3D7_1149000	Pf332	antigen 332, DBL-like protein	0.563972	-1.18972	-0.625745	-1.11647	-1.26296	-0.57151	-0.679979	PF3D7_1149000	803	S	___1	NVS(1)EEIPVEEK	3	EKSVSEEIPVEEKNVSEEIPVEEKNVSEEIP
PF3D7_1462400		conserved Plasmodium protein, unknown function	0.563797	0.367418	0.931215	0.509981	0.224855	0.95208	0.910351	PF3D7_1462400	2928	S	___1	NT(0.026)LS(0.947)S(0.026)IEDEEKFEEREPK	4	EGNKMKECSDLKNTLSSIEDEEKFEEREPKR
PF3D7_0221200		Plasmodium exported protein (hyp15), unknown function	0.563684	0.973002	1.53669	0.950001	0.996004	1.51719	1.55618	PF3D7_0221200	70	T	___1	NET(1)ILNDKLRK	3	EFMKHTLTNSSLRNETILNDKLRKRNDGINN
PF3D7_1346300	ALBA2	DNA/RNA-binding protein Alba 2	0.563523	2.04504	2.60857	2.30682	1.78326	2.74314	2.47399	PF3D7_1346300	4	S	___1	PGS(1)T(1)KS(0.996)DT(0.004)KLENEIR	3	____________MPGSTKSDTKLENEIRISY
PF3D7_0729100		conserved Plasmodium protein, unknown function	0.563377	-1.3243	-0.76092	-1.30124	-1.34735	-0.771959	-0.74988	PF3D7_0729100	1078	S	___2	S(0.5)IS(0.5)NNY(0.001)HVLSK	3	MEEHEYIPCASNKSISNNYHVLSKSEYDKSS
PF3D7_1421100		conserved Plasmodium protein, unknown function	0.563027	-1.81575	-1.25272	-1.7644	-1.86711	-1.26193	-1.24352	PF3D7_1421100	1012	S	___1	DNHS(1)DHNNNNNDNYCK	4	NNNDNNNDNYCKDNHSDHNNNNNDNYCKDNH
PF3D7_1140700		conserved Plasmodium protein, unknown function	0.562142	0.419394	0.981536	0.498281	0.340506	0.916971	1.0461	PF3D7_1140700	84	S	___1	NY(0.002)DS(0.988)DENT(0.01)WEPFENLSPNLK	4	NLDDFEFYIKWKNYDSDENTWEPFENLSPNL
PF3D7_1107800	ApiAP2	AP2 domain transcription factor, putative	0.561948	1.67837	2.24032	1.70305	1.65369	2.1499	2.33074	PF3D7_1107800	270	S	___1	LNENNNLYLNCLS(0.011)DS(0.989)YDENNVIK	15	KLNENNNLYLNCLSDSYDENNVIKKKDATSG
PF3D7_0607000		translation initiation factor IF-2, putative	0.561447	-0.283812	0.277636	-0.134909	-0.432714	0.21368	0.341591	PF3D7_0607000	296	S	___1	LNEEDELQGS(1)QKVDEK	10	SNSSLKLNEEDELQGSQKVDEKDIVLDNWED
PF3D7_0215300	ACS8	acyl-CoA synthetase	0.560098	0.0396976	0.599795	0.106501	-0.0271053	0.599861	0.59973	PF3D7_0215300	856	T	___1	NTLKS(0.355)T(0.645)DASLK	6	QNNMSNITLKNTLKSTDASLKIPEKNKVQTN
PF3D7_0930600	CYP72	peptidyl-prolyl cis-trans isomerase	0.559937	1.08884	1.64878	0.98695	1.19073	1.70576	1.59179	PF3D7_0930600	427	S	___1	FKETLMNENS(1)DNDS(1)DIAIK	10	EKRIQKFKETLMNENSDNDSDIAIKYIKYND
PF3D7_1215400		conserved Plasmodium protein, unknown function	0.559563	-3.29876	-2.73919	-3.46529	-3.13223	-2.70265	-2.77574	PF3D7_1215400	292	S	___1	KIS(0.893)DEINNEHILDY(0.107)INNIDNINNNMNYYNK	3	DKITDSGEYVDLKKISDEINNEHILDYINNI
PF3D7_1308200	cpsSII	carbamoyl phosphate synthetase	0.559508	0.025362	0.58487	0.0949497	-0.0442257	0.50127	0.66847	PF3D7_1308200	317	S	___2	MNLIT(0.008)S(0.991)S(0.884)EEY(0.117)LK	6	VINHTLLRDKMNLITSSEEYLKDLHNCNFSN
PF3D7_1308200	cpsSII	carbamoyl phosphate synthetase	0.559508	0.025362	0.58487	0.0949497	-0.0442257	0.50127	0.66847	PF3D7_1308200	318	S	___2	MNLIT(0.018)S(0.957)S(0.98)EEY(0.045)LK	7	INHTLLRDKMNLITSSEEYLKDLHNCNFSNS
PF3D7_1140700		conserved Plasmodium protein, unknown function	0.559117	-1.27227	-0.71315	-1.13169	-1.41285	-0.7136	-0.7127	PF3D7_1140700	2217	S	___1	DLS(0.817)LT(0.17)S(0.013)YEMEER	3	DDDNNNNNNNIIKDLSLTSYEMEERLSSMSV
PF3D7_0401800	PfD80	Plasmodium exported protein (PHISTb), unknown function	0.558603	-1.37021	-0.811604	-1.36611	-1.37431	-0.819359	-0.80385	PF3D7_0401800	163	T	___1	SAS(0.192)T(0.807)ASTAR	4	TTRSASAASTTRSASTASTARSASTASTASA
PF3D7_0606000	KIC1	conserved Plasmodium protein, unknown function	0.558318	1.3072	1.86552	1.28313	1.33126	1.90793	1.8231	PF3D7_0606000	542	S	___1	RQES(1)VSK	4	NSIYDNICDSFKRQESVSKSLLFSDKNKQIE
PF3D7_1123400	ERF3	translation elongation factor EF-1, subunit alpha, putative	0.558223	-3.84361	-3.28538	-3.65189	-4.03533	-3.25061	-3.32016	PF3D7_1123400	33	S	___1	GAGAEEDDENNS(0.5)NLDNT(0.5)NNENNINMNNDVNNDLDK	12	MKYKGAGAEEDDENNSNLDNTNNENNINMNN
PF3D7_1123400	ERF3	translation elongation factor EF-1, subunit alpha, putative	0.558223	-3.84361	-3.28538	-3.65189	-4.03533	-3.25061	-3.32016	PF3D7_1123400	38	T	___1	GAGAEEDDENNS(0.5)NLDNT(0.5)NNENNINMNNDVNNDLDK	17	AGAEEDDENNSNLDNTNNENNINMNNDVNND
PF3D7_0521000		conserved Plasmodium protein, unknown function	0.556111	-1.1638	-0.607685	-1.07962	-1.24797	-0.55542	-0.65995	PF3D7_0521000	33	S	___1	WDNIHS(0.999)LT(0.001)K	6	NEEELKKHRKWDNIHSLTKEKKNSKHENEEE
PF3D7_0319700	ABCI3	ABC transporter I family member 1, putative	0.555813	-1.6154	-1.05958	-1.69192	-1.53888	-1.09619	-1.02298	PF3D7_0319700	2714	T	___1	GEGIYT(1)NDENQFDDYIDKYSLYDLR	6	VYEQDIQLYKGEGIYTNDENQFDDYIDKYSL
PF3D7_0504000	ATPase3	cation transporting P-ATPase	0.555138	-3.29659	-2.74145	-3.25084	-3.34235	-2.7996	-2.68331	PF3D7_0504000	735	S	___2	YQEGEEEEEY(0.236)EEDHS(0.882)S(0.882)IHIDK	15	RYQEGEEEEEYEEDHSSIHIDKKKNKKKKNN
PF3D7_0504000	ATPase3	cation transporting P-ATPase	0.555138	-3.29659	-2.74145	-3.25084	-3.34235	-2.7996	-2.68331	PF3D7_0504000	736	S	___2	YQEGEEEEEY(0.236)EEDHS(0.882)S(0.882)IHIDK	16	YQEGEEEEEYEEDHSSIHIDKKKNKKKKNNK
PF3D7_1004400		RNA-binding protein, putative	0.555007	-1.96312	-1.40811	-1.85	-2.07623	-1.48015	-1.33607	PF3D7_1004400	659	S	___1	S(0.452)S(0.548)EEVGEHTNS(1)IINEDINKDQTDIIDEK	11	KRILKSSEEVGEHTNSIINEDINKDQTDIID
PF3D7_0814000		60S ribosomal protein L13-2, putative	0.554728	-1.29071	-0.735985	-1.37189	-1.20954	-0.975939	-0.496031	PF3D7_0814000	121	S	___1	NS(1)LVMIPLK	2	ESLTKNVERLLKYKNSLVMIPLKKNKAKKGI
PF3D7_1219000	FRM2	formin 2	0.553952	-2.1823	-1.62834	-2.08007	-2.28452	-1.57706	-1.67963	PF3D7_1219000	1650	S	___1	KGHS(1)FNK	4	LEEKEELMNTYKKGHSFNKVKELYEQESLDI
PF3D7_0914900		BSD-domain protein, putative	0.553787	-0.035902	0.517885	0.0480614	-0.119865	0.57634	0.459431	PF3D7_0914900	556	S	___1	FLDEIS(1)EANRS(1)ACDLEEPK	6	FQKISEYNTKFLDEISEANRSACDLEEPKSD
PF3D7_0532400	LyMP	lysine-rich membrane-associated PHISTb protein	0.553317	-0.263572	0.289745	-0.274069	-0.253075	0.27327	0.306221	PF3D7_0532400	317	S	___1	SNPNNEIS(1)LR	8	KKLRNRRKSNPNNEISLRTYGQSTNPQVYRR
PF3D7_1436300	PTEX150	translocon component PTEX150	0.552857	0.744637	1.29749	0.8001	0.689175	1.31122	1.28377	PF3D7_1436300	940	S	___1	NNS(1)NDDDDMDNGYVTFDGK	3	SRKENPFVPTNTKNNSNDDDDMDNGYVTFDG
PF3D7_0906600		zinc finger protein, putative	0.552432	0.480173	1.03261	0.825121	0.135225	1.24917	0.81604	PF3D7_0906600	3	T	___2	S(0.439)T(0.561)NT(0.561)S(0.439)KKGYNK	2	_____________MSTNTSKKGYNKYMDKRM
PF3D7_0906600		zinc finger protein, putative	0.552432	0.480173	1.03261	0.825121	0.135225	1.24917	0.81604	PF3D7_0906600	5	T	___2	S(0.439)T(0.561)NT(0.561)S(0.439)KKGYNK	4	___________MSTNTSKKGYNKYMDKRMYV
PF3D7_0719300	ARP6	actin-related protein, putative	0.551968	0.551718	1.10369	0.597631	0.505804	1.03401	1.17336	PF3D7_0719300	801	S	___1	YSDDS(0.001)NKYS(0.999)DDNNKYNIDK	9	NNNNNNKYSDDSNKYSDDNNKYNIDKCNGRK
PF3D7_1104200	SNF2L	chromatin remodeling protein	0.551528	-0.419292	0.132236	-0.17638	-0.662205	0.320601	-0.0561295	PF3D7_1104200	814	S	___1	TQDISS(0.003)IS(0.997)DEDIDIILADAEKR	8	FGAPEVYKTQDISSISDEDIDIILADAEKRT
PF3D7_0305200		conserved Plasmodium protein, unknown function	0.550467	-0.177952	0.372516	-0.229229	-0.126675	0.48525	0.259781	PF3D7_0305200	186	S	___1	S(0.768)T(0.111)S(0.111)INY(0.003)T(0.006)DNSFVLNK	1	VSYENVLNDNFIKSRSTSINYTDNSFVLNKE
PF3D7_1334700	MSRP7	MSP7-like protein	0.550384	0.630932	1.18132	0.58091	0.680954	1.15318	1.20945	PF3D7_1334700	180	S	___1	GT(0.144)S(0.837)QNDS(0.019)DYLHSVYDK	3	LCGHTKDNHNNLRGTSQNDSDYLHSVYDKAL
PF3D7_0404600		conserved Plasmodium membrane protein, unknown function	0.550363	-2.55955	-2.00919	-2.67287	-2.44624	-1.97613	-2.04225	PF3D7_0404600	2039	S	___1	FS(0.128)DDS(0.872)DHVDEK	5	ISLNNYLKNFKFSDDSDHVDEKHMDDTSDDE
PF3D7_0627800	ACS	acetyl-CoA synthetase, putative	0.550227	-0.826742	-0.276515	-0.76433	-0.889154	-0.32243	-0.2306	PF3D7_0627800	456	S	___2	ISYSEKS(0.999)YS(0.001)K	7	TKNNPINHKISYSEKSYSKELINTDMVNNDN
PF3D7_1116800	HSP101	heat shock protein 101	0.548998	3.10686	3.65586	3.21937	2.99434	3.6775	3.63421	PF3D7_1116800	356	S	___1	FIESCS(1)AFER	6	GATTIAEYRKFIESCSAFERRFEKILVEPPS
PF3D7_1334500	MSRP6	MSP7-like protein	0.548878	0.895818	1.4447	0.9062	0.885435	1.51649	1.3729	PF3D7_1334500	49	S	___1	NEVFNALNEHLES(1)ISNIVK	13	VKKNEVFNALNEHLESISNIVKVNIMDALSN
PF3D7_1023900	CHD1	chromodomain-helicase-DNA-binding protein 1 homolog, putative	0.548858	-0.687012	-0.138154	-0.564219	-0.809805	-0.135239	-0.141069	PF3D7_1023900	2028	S	___3	T(1)S(1)T(1)HIT(1)EK	2	DKNSKHLKKKRQRRTSTHITEKDKFRLYRSL
PF3D7_1023900	CHD1	chromodomain-helicase-DNA-binding protein 1 homolog, putative	0.548858	-0.687012	-0.138154	-0.564219	-0.809805	-0.135239	-0.141069	PF3D7_1023900	2027	T	___3	T(1)S(1)T(1)HIT(1)EK	1	NDKNSKHLKKKRQRRTSTHITEKDKFRLYRS
PF3D7_1023900	CHD1	chromodomain-helicase-DNA-binding protein 1 homolog, putative	0.548858	-0.687012	-0.138154	-0.564219	-0.809805	-0.135239	-0.141069	PF3D7_1023900	2029	T	___3	T(1)S(1)T(1)HIT(1)EK	3	KNSKHLKKKRQRRTSTHITEKDKFRLYRSLL
PF3D7_1023900	CHD1	chromodomain-helicase-DNA-binding protein 1 homolog, putative	0.548858	-0.687012	-0.138154	-0.564219	-0.809805	-0.135239	-0.141069	PF3D7_1023900	2032	T	___3	T(1)S(1)T(1)HIT(1)EK	6	KHLKKKRQRRTSTHITEKDKFRLYRSLLKFG
PF3D7_0202000	KAHRP	knob-associated histidine-rich protein	0.548208	-0.237738	0.310471	-0.22196	-0.253515	0.287291	0.333651	PF3D7_0202000	560	S	___2	EAS(0.701)T(0.283)S(0.016)KEATKEAS(0.016)T(0.283)S(0.701)K	15	KEASTSKEATKEASTSKEATKEASTSKEATK
PF3D7_1478600	PTP3	EMP1-trafficking protein	0.547878	3.58849	4.13637	3.56645	3.61053	4.06347	4.20927	PF3D7_1478600	673	S	___1	NEKS(1)IPNK	4	SKLDTQNGKNEKNEKSIPNKLDSQNGKNEKN
PF3D7_1248500		bax inhibitor 1, putative	0.546652	2.30218	2.84883	2.34772	2.25665	2.85788	2.83979	PF3D7_1248500	38	S	___1	DKENYDKS(0.992)NS(0.008)GQK	8	GYNYSQNKDKENYDKSNSGQKGYYYDARTNI
PF3D7_1307800		fork head domain protein, putative	0.546373	-0.607537	-0.0611639	-0.444489	-0.770586	0.0839615	-0.206289	PF3D7_1307800	242	S	___2	S(0.92)S(0.088)EHT(0.409)RT(0.304)S(0.262)KDNS(0.012)Y(0.002)YDSK	1	DKYDKQMDKIYILKKSSEHTRTSKDNSYYDS
PF3D7_0923400		conserved Plasmodium protein, unknown function	0.545663	0.407793	0.953456	0.45499	0.360596	0.867071	1.03984	PF3D7_0923400	424	S	___1	NSFKEEFKENS(0.981)S(0.019)K	11	GDIKKNSFKEEFKENSSKRKSYSVNKISRKS
PF3D7_0918900	gammaGCS	gamma-glutamylcysteine synthetase	0.545232	-2.57275	-2.02752	-2.73294	-2.41257	-2.12516	-1.92988	PF3D7_0918900	1042	T	___2	T(0.967)IY(0.033)EES(0.998)MDNT(0.002)VEFAK	1	EVLKDDQDYCTCTRRTIYEESMDNTVEFAKK
PF3D7_0922200	SAMS	S-adenosylmethionine synthetase	0.544713	-3.18302	-2.6383	-3.23368	-3.13235	-2.86498	-2.41163	PF3D7_0922200	373	S	___1	T(0.418)S(0.582)AYGHFGR	2	IIQELKLTEPVFSKTSAYGHFGREGDTFTWE
PF3D7_0302500	CLAG3.1	cytoadherence linked asexual protein 3.1;cytoadherence linked asexual protein 3.2	0.544248	-1.96377	-1.41953	-1.88393	-2.04362	-1.5152	-1.32385	PF3D7_0302500;PF3D7_0302200	533;535	S	___1	QIS(0.087)KDS(0.913)NLLNNITK	6	IEKCHSDQARQISKDSNLLNNITKCDLCKGA
PF3D7_1443100		conserved Plasmodium protein, unknown function	0.543688	-1.23931	-0.695624	-1.30686	-1.17176	-0.542759	-0.84849	PF3D7_1443100	217	S	___1	FNRS(0.708)S(0.292)K	4	NNNNNINNRSFKFNRSSKNKYDENDFNNHKK
PF3D7_1142100		conserved Plasmodium protein, unknown function	0.542338	-3.1309	-2.58856	-2.94731	-3.3145	-2.44428	-2.73285	PF3D7_1142100	538	S	___2	AT(0.139)S(0.84)DLS(0.277)S(0.744)IHNK	3	KNKKKTTLSDNEKATSDLSSIHNKKINNNMN
PF3D7_1142100		conserved Plasmodium protein, unknown function	0.542338	-3.1309	-2.58856	-2.94731	-3.3145	-2.44428	-2.73285	PF3D7_1142100	542	S	___2	AT(0.139)S(0.84)DLS(0.277)S(0.744)IHNK	7	KTTLSDNEKATSDLSSIHNKKINNNMNNMDN
PF3D7_1333600	UTP4	U3 small nucleolar RNA-associated protein 4, putative	0.541852	-5.24862	-4.70676	-5.23676	-5.26048	-4.91762	-4.49591	PF3D7_1333600	239	S	___1	LS(0.823)T(0.177)DIDHLVDQYDER	2	VNNNIEYITNKRMRLSTDIDHLVDQYDEREN
PF3D7_1219600	ATPase2	aminophospholipid-transporting P-ATPase	0.540638	2.27598	2.81662	2.28434	2.26763	2.82836	2.80488	PF3D7_1219600	622	S	___1	EIS(1)S(1)RVIS(0.966)FKDS(0.034)K	4	SSLGIISNAPKREISSRVISFKDSKEKNYIY
PF3D7_1410400	RAP1	rhoptry-associated protein 1	0.540558	2.06154	2.6021	2.16439	1.95869	2.57834	2.62586	PF3D7_1410400	149	S	___2	S(0.002)S(0.002)S(0.002)PS(0.429)S(0.502)T(0.091)KS(0.934)S(0.033)S(0.005)PS(0.001)NVK	6	PSGTQTSGLKSSSPSSTKSSSPSNVKSASPH
PF3D7_1410400	RAP1	rhoptry-associated protein 1	0.540558	2.06154	2.6021	2.16439	1.95869	2.57834	2.62586	PF3D7_1410400	152	S	___2	S(0.002)S(0.002)S(0.002)PS(0.429)S(0.502)T(0.091)KS(0.934)S(0.033)S(0.005)PS(0.001)NVK	9	TQTSGLKSSSPSSTKSSSPSNVKSASPHGES
PF3D7_0420300	ApiAP2	AP2 domain transcription factor, putative	0.540302	-0.829752	-0.28945	-0.72139	-0.938114	-0.46002	-0.118879	PF3D7_0420300	728	S	___1	NECNANNGS(1)DKEHLKEEDVCNK	9	NFFGLFKNECNANNGSDKEHLKEEDVCNKNT
PF3D7_1117700	RAN	GTP-binding nuclear protein RAN/TC4	0.540257	0.818938	1.3592	0.760441	0.877436	1.21197	1.50642	PF3D7_1117700	168	S	___1	RLS(1)NQPNLVFVGEHAK	3	NYNFEKPFLWLARRLSNQPNLVFVGEHAKAP
PF3D7_0317300		conserved Plasmodium protein, unknown function	0.539712	1.37952	1.91923	1.34245	1.41658	1.94043	1.89803	PF3D7_0317300	22	S	___1	NEKDDYDKVNEEEYS(1)LENFR	15	KNEKDDYDKVNEEEYSLENFRGIDMNNNVDI
PF3D7_0502600		conserved Plasmodium protein, unknown function	0.538978	-2.85015	-2.31117	-2.89565	-2.80465	-2.42891	-2.19343	PF3D7_0502600	252	S	___3	IY(1)LS(1)S(1)WLY(1)INERIIDLGGK	4	DYIMKMGYKFIKIYLSSWLYINERIIDLGGK
PF3D7_0502600		conserved Plasmodium protein, unknown function	0.538978	-2.85015	-2.31117	-2.89565	-2.80465	-2.42891	-2.19343	PF3D7_0502600	253	S	___3	IY(1)LS(1)S(1)WLY(1)INERIIDLGGK	5	YIMKMGYKFIKIYLSSWLYINERIIDLGGKN
PF3D7_0502600		conserved Plasmodium protein, unknown function	0.538978	-2.85015	-2.31117	-2.89565	-2.80465	-2.42891	-2.19343	PF3D7_0502600	250	Y	___3	IY(1)LS(1)S(1)WLY(1)INERIIDLGGK	2	IYDYIMKMGYKFIKIYLSSWLYINERIIDLG
PF3D7_0502600		conserved Plasmodium protein, unknown function	0.538978	-2.85015	-2.31117	-2.89565	-2.80465	-2.42891	-2.19343	PF3D7_0502600	256	Y	___3	IY(1)LS(1)S(1)WLY(1)INERIIDLGGK	8	KMGYKFIKIYLSSWLYINERIIDLGGKNKIK
PF3D7_1360400		conserved Plasmodium protein, unknown function	0.538487	0.156623	0.69511	0.12516	0.188086	0.743481	0.64674	PF3D7_1360400	179	S	___1	THNDNDNT(0.06)S(0.94)ETSK	9	SNEVFLKTHNDNDNTSETSKIINMDDDIIKN
PF3D7_1110900		ES2 protein, putative	0.537168	3.36804	3.90521	3.31521	3.42088	3.9706	3.83982	PF3D7_1110900	242	S	___1	YFEEDENYSLVNYVHS(1)DQEYIK	16	YFEEDENYSLVNYVHSDQEYIKEKKKKKYKK
PF3D7_1218900		conserved Plasmodium protein, unknown function	0.536872	-2.19694	-1.66007	-2.17268	-2.2212	-1.62615	-1.69399	PF3D7_1218900	221	Y	___1	MNS(0.192)Y(0.696)NWDS(0.054)Y(0.047)FT(0.01)QDKEIYK	4	LYNTNNVTHKVRMNSYNWDSYFTQDKEIYKK
PF3D7_0924100		conserved Plasmodium protein, unknown function	0.536848	1.08111	1.61796	1.07942	1.08279	1.6629	1.57301	PF3D7_0924100	331	S	___1	KGDS(1)NHELK	4	EEEMKQNMESIKKGDSNHELKGKNSQKTDDS
PF3D7_0922100		ubiquitin-like protein, putative	0.534627	-2.48545	-1.95082	-2.60684	-2.36407	-1.9386	-1.96305	PF3D7_0922100	514	S	___1	KY(0.001)Y(0.007)DS(0.629)NS(0.547)S(0.981)IS(0.836)PNEDAYVER	8	ITNKHKKKKYYDSNSSISPNEDAYVERIRRD
PF3D7_0702500		Plasmodium exported protein, unknown function	0.534543	-3.10482	-2.57028	-3.20407	-3.00558	-2.70361	-2.43695	PF3D7_0702500	199	T	___2	NYS(0.002)LGNLS(0.523)T(0.57)GT(0.68)T(0.302)S(0.218)QGS(0.607)T(0.078)S(0.017)S(0.004)R	11	LPAGRNYSLGNLSTGTTSQGSTSSRHYSLGG
PF3D7_1428700		conserved protein, unknown function	0.534328	-1.11091	-0.576584	-1.03926	-1.18257	-0.592669	-0.560499	PF3D7_1428700	183	S	___1	YYKDNDS(1)NDNNKDNDNNNNNNNNNNNNNNK	7	NDTLLKEHKYYKDNDSNDNNKDNDNNNNNNN
PF3D7_0401800	PfD80	Plasmodium exported protein (PHISTb), unknown function	0.534012	-0.308931	0.22508	-0.270988	-0.346874	0.10663	0.343531	PF3D7_0401800	280	T	___1	LPS(0.164)T(0.815)GS(0.021)TIRFPSTGSSR	4	PSTGSTSGSTTRLPSTGSTIRFPSTGSSRLE
PF3D7_0108300	ARP	conserved Plasmodium protein, unknown function	0.532792	-2.13346	-1.60067	-1.92913	-2.3378	-1.58701	-1.61433	PF3D7_0108300	1643	T	___1	T(0.881)S(0.119)LLKNDNIK	1	HGEHNIDNIVNKNVRTSLLKNDNIKTTTTER
PF3D7_0630300		DNA polymerase epsilon catalytic subunit A, putative	0.532698	-2.01906	-1.48636	-2.01446	-2.02365	-1.31793	-1.65479	PF3D7_0630300	1537	S	___1	KNS(0.964)IS(0.036)FK	3	IKKIRIEDKKQKKKNSISFKEQEDEETNKEK
PF3D7_1328300		conserved Plasmodium protein, unknown function	0.532643	2.27495	2.80759	2.18779	2.3621	2.82147	2.79371	PF3D7_1328300	328	T	___1	YNTYDKDICS(1)DIELT(1)DIDN	15	KYNTYDKDICSDIELTDIDN___________
PF3D7_1467900		rab GTPase activator, putative	0.532272	-0.646792	-0.11452	-0.605129	-0.688456	-0.102409	-0.126631	PF3D7_1467900	1012	S	___1	HYS(1)CNVQR	3	SVDNYYHTLERLRHYSCNVQRNTENEDEVIQ
PF3D7_1235100		conserved Plasmodium protein, unknown function	0.532232	1.07768	1.60992	1.25043	0.904936	1.52514	1.69469	PF3D7_1235100	60	S	___1	YNWGNSIDSTAAESKPIDEKDPMYDS(1)EIEK	26	AAESKPIDEKDPMYDSEIEKINKYLKK____
PF3D7_0702400	SEMP1	small exported membrane protein 1	0.532078	-1.83161	-1.29953	-1.86328	-1.79995	-1.34453	-1.25454	PF3D7_0702400	19	T	___1	QQNEEGAATAANT(1)QEK	13	PQKQQNEEGAATAANTQEKKFNPTRNPSQSG
PF3D7_1330200		conserved Plasmodium protein, unknown function	0.531753	-1.32225	-0.790495	-1.24996	-1.39454	-0.807819	-0.77317	PF3D7_1330200	179	T	___2	VFY(1)T(1)AELFWNQEK	4	YLTWVIEYEDRRVFYTAELFWNQEKSKMIKG
PF3D7_1330200		conserved Plasmodium protein, unknown function	0.531753	-1.32225	-0.790495	-1.24996	-1.39454	-0.807819	-0.77317	PF3D7_1330200	178	Y	___2	VFY(1)T(1)AELFWNQEK	3	YYLTWVIEYEDRRVFYTAELFWNQEKSKMIK
PF3D7_0628200	PK4	eukaryotic translation initiation factor 2-alpha kinase	0.531219	-1.73913	-1.20791	-1.63928	-1.83898	-1.13339	-1.28243	PF3D7_0628200	2120	S	___1	NLS(0.943)LIQT(0.028)S(0.028)HIPYDAPLADFLENGR	3	HEKLGNNKSSSARNLSLIQTSHIPYDAPLAD
PF3D7_0905800		conserved Plasmodium protein, unknown function	0.531197	-1.18384	-0.652645	-1.14153	-1.22615	-0.73617	-0.56912	PF3D7_0905800	824	T	___1	FT(0.5)YDES(0.5)PFDNNINVK	2	NYKPSKFSTKRTNKFTYDESPFDNNINVKDA
PF3D7_1021100		conserved Plasmodium protein, unknown function	0.530909	-0.615388	-0.0844793	-0.6961	-0.534676	-0.00272942	-0.166229	PF3D7_1021100	1338	S	___1	KNS(1)IDNMEHMK	3	EKDVVCMYNMNKKKNSIDNMEHMKNMKDVNN
PF3D7_1116400	SEC12	guanine nucleotide-exchange factor SEC12	0.530787	1.31299	1.84378	1.29749	1.3285	1.79535	1.89221	PF3D7_1116400	200	T	___1	KDNDNKT(1)DDDNYIAVNNNLYLDK	7	DNKTNEDKKKDNDNKTDDDNYIAVNNNLYLD
PF3D7_0812500		RNA-binding protein, putative	0.530503	0.297217	0.827721	0.3612	0.233234	0.742651	0.91279	PF3D7_0812500	886	S	___1	S(0.231)FS(0.678)ES(0.083)RY(0.001)DY(0.001)S(0.006)NK	3	NFNKKDTRRNHSKSFSESRYDYSNKYNDRKK
PF3D7_0708800	HSP110c	heat shock protein 110	0.530472	-2.16574	-1.63527	-2.20184	-2.12963	-1.71932	-1.55121	PF3D7_0708800	863	T	___1	NNEEKENS(0.389)T(0.611)KNENS(1)ANPEE	9	EQNNEAKNNEEKENSTKNENSANPEE_____
PF3D7_0818900	HSP70	heat shock protein 70	0.530273	-3.08026	-2.54999	-3.57579	-2.58473	-2.29832	-2.80166	PF3D7_0818900	278	T	___1	LRT(1)QCER	3	GKDLSKNSRALRRLRTQCERAKRTLSSSTQA
PF3D7_0320000	I2	protein phosphatase inhibitor 2	0.530011	2.18665	2.71666	2.18846	2.18484	2.68281	2.75051	PF3D7_0320000	117	T	___1	S(0.016)GT(0.984)LDDIDEEYKPDNK	3	HYNEYKMLQKLRKSGTLDDIDEEYKPDNKDS
PF3D7_0730900	PTP4	EMP1-trafficking protein	0.528852	3.77042	4.29928	3.79519	3.74566	4.21769	4.38086	PF3D7_0730900	2097	S	___1	GVNVQS(0.736)S(0.263)NT(0.001)NK	6	TLGKHKHHEKGVNVQSSNTNKHMPRKMLR__
PF3D7_0507800		conserved Plasmodium protein, unknown function	0.528848	1.92052	2.44937	2.17331	1.66773	2.4348	2.46394	PF3D7_0507800	30	S	___1	YEENS(1)DDHIIFDDLSEYSPSIISNNDNIHVEK	5	IEMEEIKKITRYEENSDDHIIFDDLSEYSPS
PF3D7_0202000	KAHRP	knob-associated histidine-rich protein	0.528644	5.13663	5.66527	5.13789	5.13536	5.62791	5.70263	PF3D7_0202000	634	S	___1	NAANNGEQVMS(1)RGQAQLQEAGKK	11	ETADKNAANNGEQVMSRGQAQLQEAGKKKKK
PF3D7_1013600		conserved Plasmodium protein, unknown function	0.528088	-0.967327	-0.43924	-1.08216	-0.852495	-0.449589	-0.42889	PF3D7_1013600	244	S	___1	ENT(0.001)QEDS(0.569)S(0.427)Y(0.002)KNY(0.001)NYER	7	NTYDAYNERENTQEDSSYKNYNYERDKNNDI
PF3D7_1149000	Pf332	antigen 332, DBL-like protein	0.527753	-2.43921	-1.91146	-2.34038	-2.53805	-2.08479	-1.73813	PF3D7_1149000	2572	S	___1	DVSPTEDFVEQT(0.019)DS(0.962)VT(0.019)EK	14	VKDVSPTEDFVEQTDSVTEKVIEQEGSNTEV
PF3D7_0218500	SNRPD2	small nuclear ribonucleoprotein Sm D2, putative	0.527392	1.18699	1.71438	1.23251	1.14146	1.7742	1.65456	PF3D7_0218500	3	S	___2	MKS(1)EVT(1)IEENRDNPEDGPLGLLSECVK	3	_____________MKSEVTIEENRDNPEDGP
PF3D7_0218500	SNRPD2	small nuclear ribonucleoprotein Sm D2, putative	0.527392	1.18699	1.71438	1.23251	1.14146	1.7742	1.65456	PF3D7_0218500	6	T	___2	MKS(1)EVT(1)IEENRDNPEDGPLGLLSECVK	6	__________MKSEVTIEENRDNPEDGPLGL
PF3D7_0905800		conserved Plasmodium protein, unknown function	0.526947	-2.62128	-2.09434	-2.6211	-2.62146	-2.18103	-2.00764	PF3D7_0905800	715	S	___1	QPFPQY(0.006)GPINT(0.372)PPS(0.622)INKK	14	NRQPFPQYGPINTPPSINKKNAHSNNNNNNN
PF3D7_1442900	ARFGEF	protein transport protein SEC7, putative	0.526702	-5.33848	-4.81177	-5.06926	-5.60769	-4.55948	-5.06407	PF3D7_1442900	809	S	___1	KHSNSNNNNNDGNDY(0.111)DNDGS(0.883)LHQHNT(0.006)DNR	20	SNNNNNDGNDYDNDGSLHQHNTDNRRRTSFC
PF3D7_0905800		conserved Plasmodium protein, unknown function	0.525813	-5.22761	-4.70179	-5.28337	-5.17185	-4.17207	-5.23152	PF3D7_0905800	666	S	___1	NVHS(1)QNYTR	4	DGMASSYNHMNKNVHSQNYTRMGDHSMDSPN
PF3D7_1468800	U2AF2	splicing factor U2AF large subunit, putative	0.525123	0.225072	0.750195	0.21534	0.234804	0.71542	0.784969	PF3D7_1468800	18	S	___1	NS(0.376)NCKS(0.624)DVS(1)NIEENDKK	9	KKLTSLKNSNCKSDVSNIEENDKKNVKKSDT
PF3D7_0401800	PfD80	Plasmodium exported protein (PHISTb), unknown function	0.524077	5.99076	6.51484	5.99897	5.98255	6.52601	6.50366	PF3D7_0401800	133	S	___1	S(1)AS(1)AASTTR	1	TASTASTASAASTTRSASAASTTRSASAAST
PF3D7_1409600		conserved Plasmodium protein, unknown function	0.523602	-2.65717	-2.13356	-2.6685	-2.64583	-1.90395	-2.36318	PF3D7_1409600	330	S	___1	KNKNS(0.973)IS(0.026)NYNK	5	DLYKLSKKKLKKNKNSISNYNKKQENNDILT
PF3D7_0500800	MESA	mature parasite-infected erythrocyte surface antigen	0.523244	-2.0596	-1.53635	-1.95784	-2.16136	-1.57837	-1.49434	PF3D7_0500800	448	T	___2	NIET(1)DDEEET(1)LVVKDDAK	4	FQMLGCNFLCNKNIETDDEEETLVVKDDAKK
PF3D7_0500800	MESA	mature parasite-infected erythrocyte surface antigen	0.523244	-2.0596	-1.53635	-1.95784	-2.16136	-1.57837	-1.49434	PF3D7_0500800	454	T	___2	NIET(1)DDEEET(1)LVVKDDAK	10	NFLCNKNIETDDEEETLVVKDDAKKKHKFLR
PF3D7_1033600	CEF1	myb2 transcription factor, putative	0.523018	-1.65864	-1.13562	-1.68272	-1.63456	-1.05826	-1.21298	PF3D7_1033600	517	S	___2	NIS(1)LYAHSIISYK	3	KNKIISDIKSFKKNISLYAHSIISYKNLKND
PF3D7_1033600	CEF1	myb2 transcription factor, putative	0.523018	-1.65864	-1.13562	-1.68272	-1.63456	-1.05826	-1.21298	PF3D7_1033600	522	S	___2	NIS(0.997)LY(0.003)AHS(1)IISYK	8	SDIKSFKKNISLYAHSIISYKNLKNDQSMMD
PF3D7_1123100	CDPK7	calcium-dependent protein kinase 7	0.522968	-4.6856	-4.16263	-4.46159	-4.90961	-4.21269	-4.11257	PF3D7_1123100	1330	T	___2	AEEHVT(0.958)DES(0.346)S(0.318)FEY(0.378)NQNGVFR	6	KDEKNEEINKAEEHVTDESSFEYNQNGVFRN
PF3D7_1366300		conserved Plasmodium protein, unknown function	0.522948	-2.61776	-2.09481	-2.59681	-2.63871	-2.03951	-2.15012	PF3D7_1366300	404	S	___1	HYRES(1)K	5	NDEISNNQEEKHYRESKNVSENIQEESITKE
PF3D7_0731100	PTP2	EMP1-trafficking protein	0.522643	-1.60374	-1.0811	-1.58271	-1.62477	-1.0938	-1.0684	PF3D7_0731100	477	S	___1	GSFFS(1)DPENYRETDKK	5	YKKEENPQMPKGSFFSDPENYRETDKKNNNL
PF3D7_1347700	ECT	ethanolamine-phosphate cytidylyltransferase	0.521998	-0.313747	0.208251	-0.24987	-0.377625	0.127531	0.288971	PF3D7_1347700	166	S	___1	LGDIVVVGINS(1)DEDALNSK	11	RQAKKLGDIVVVGINSDEDALNSKGVKPIYT
PF3D7_1353400		Ran-binding protein, putative	0.521708	-1.04054	-0.51883	-0.96891	-1.11217	-0.49831	-0.539351	PF3D7_1353400	1037	S	___1	NKDNISDINIIEKQS(1)NDDHNNK	15	KNKDNISDINIIEKQSNDDHNNKQRIDNSSY
PF3D7_0814200	ALBA1	DNA/RNA-binding protein Alba 1	0.521338	3.29042	3.81176	3.42868	3.15215	3.86694	3.75657	PF3D7_0814200	88	S	___1	CGSTVITDQYVS(1)GQDNS(1)EHVVQEK	17	GSTVITDQYVSGQDNSEHVVQEKTVSFIEIL
PF3D7_1473200		DnaJ protein, putative	0.521203	-0.426087	0.0951157	-0.34738	-0.504795	0.084301	0.10593	PF3D7_1473200	211	S	___1	NQEEGS(0.854)T(0.145)NCS(0.001)NVVEEEMTLEK	6	VVEQLNDQERNQEEGSTNCSNVVEEEMTLEK
PF3D7_0624000	HK	hexokinase	0.521132	2.12387	2.64501	1.93053	2.31721	3.02697	2.26304	PF3D7_0624000	18	T	___1	LDT(1)IECDIPINEELSWR	3	EYDIAKNDVTYTKLDTIECDIPINEELSWRI
PF3D7_0401800	PfD80	Plasmodium exported protein (PHISTb), unknown function	0.521122	0.993228	1.51435	1.02293	0.963526	1.44292	1.58578	PF3D7_0401800	64	S	___2	S(0.288)S(0.341)S(0.407)CS(0.97)S(0.958)LAS(0.028)T(0.006)T(0.001)K	5	SEEKAEDDYKKSSSCSSLASTTKRSPSTAST
PF3D7_1408200	ApiAP2	AP2 domain transcription factor AP2-G2, putative	0.521087	0.0384331	0.55952	0.0390415	0.0378246	0.63158	0.487459	PF3D7_1408200	933	S	___1	NNLSNNDPIDKS(1)VEKDIFTDQYK	12	LDEKNNLSNNDPIDKSVEKDIFTDQYKTNKN
PF3D7_1107300	PAIP1	polyadenylate-binding protein-interacting protein 1, putative	0.520477	-1.60832	-1.08784	-1.27486	-1.94179	-0.94031	-1.23538	PF3D7_1107300	1430	S	___2	KEKLS(0.297)VS(0.731)S(0.875)IY(0.097)EGSNNEK	8	NNNNNNKKKEKLSVSSIYEGSNNEKNQNVED
PF3D7_0519700		FoP domain-containing protein, putative	0.519012	2.37183	2.89084	2.24938	2.49427	3.0131	2.76858	PF3D7_0519700	145	S	___1	LT(0.151)S(0.849)KDLDDELDKYMGSSNVK	3	FRKNQNLHDKIGKLTSKDLDDELDKYMGSSN
PF3D7_0202400	PTEF	gamete antigen 27/25, putative	0.518667	-1.41122	-0.89255	-1.31577	-1.50666	-0.865519	-0.91958	PF3D7_0202400	505	T	___1	GEYGEGT(1)DDEEDKEK	7	TDVDEKKEKGEYGEGTDDEEDKEKEEDDEET
PF3D7_0301700		Plasmodium exported protein, unknown function	0.518608	1.03749	1.5561	1.02863	1.04635	1.53222	1.57998	PF3D7_0301700	152	S	___2	VTVLEPQTENS(1)EDEENYEK	11	NSTPRVTVLEPQTENSEDEENYEKTIVDELN
PF3D7_1011800	PREBP	PRE-binding protein	0.518353	0.239228	0.757581	0.209541	0.268915	0.73068	0.784481	PF3D7_1011800	647	S	___1	NS(1)DIEEAEEKLNEILK	2	AKTFDASATIKGSKNSDIEEAEEKLNEILKN
PF3D7_1250400		conserved Plasmodium protein, unknown function	0.517913	2.01384	2.53176	2.12362	1.90406	2.50497	2.55854	PF3D7_1250400	46	S	___1	S(0.004)DMS(0.004)LIIS(0.991)EQLRK	8	IKMFENIKSDMSLIISEQLRKRSRTTFKLKN
PF3D7_1001500	ETRAMP10	early transcribed membrane protein 10.1	0.517823	2.96957	3.4874	3.04122	2.89792	3.54246	3.43233	PF3D7_1001500	99	S	___1	SQEGS(0.985)T(0.015)PLLTAKA	5	DKKGSNDSKNKSQEGSTPLLTAKA_______
PF3D7_0708800	HSP110c	heat shock protein 110	0.517458	2.40485	2.92231	2.41518	2.39451	2.91198	2.93263	PF3D7_0708800	862	S	___1	NNEEKENS(0.986)T(0.014)KNENSANPEE	8	EEQNNEAKNNEEKENSTKNENSANPEE____
PF3D7_1466900		rhoptry protein, putative	0.517207	0.145082	0.66229	0.0837402	0.206425	0.61685	0.707729	PF3D7_1466900	104	S	___1	NNS(1)LENNEINKYDYQNEYNK	3	FDLPNNLEDITSKNNSLENNEINKYDYQNEY
PF3D7_0401800	PfD80	Plasmodium exported protein (PHISTb), unknown function	0.516962	1.20688	1.72384	1.29896	1.11481	1.6985	1.74919	PF3D7_0401800	291	S	___2	LPS(0.004)T(0.004)GS(0.003)T(0.003)IRFPS(0.154)T(0.154)GS(0.835)S(0.835)RLEDY(0.008)EK	15	RLPSTGSTIRFPSTGSSRLEDYEKEGSNVDI
PF3D7_0401800	PfD80	Plasmodium exported protein (PHISTb), unknown function	0.515988	1.30391	1.8199	1.28562	1.3222	1.80935	1.83044	PF3D7_0401800	302	S	___2	LEDYEKEGS(1)NVDITEEEEK	9	PSTGSSRLEDYEKEGSNVDITEEEEKEAESV
PF3D7_0401800	PfD80	Plasmodium exported protein (PHISTb), unknown function	0.515988	1.30391	1.8199	1.28562	1.3222	1.80935	1.83044	PF3D7_0401800	307	T	___2	LEDYEKEGS(1)NVDIT(1)EEEEK	14	SRLEDYEKEGSNVDITEEEEKEAESVDDNNK
PF3D7_1438400	MCA2	metacaspase-like protein	0.515513	-1.41003	-0.894514	-1.16409	-1.65597	-0.990108	-0.79892	PF3D7_1438400	712	S	___1	LITNIYQFTGGQS(1)QK	13	HEKLITNIYQFTGGQSQKSCNIKNQNVKEEK
PF3D7_0519400	RPS24	40S ribosomal protein S24	0.515488	-2.79707	-2.28158	-2.7934	-2.80074	-2.41584	-2.14732	PF3D7_0519400	34	S	___1	QFALEILHPNKGS(1)VAK	13	RRKQFALEILHPNKGSVAKKEVKERLAKMYK
PF3D7_0202000	KAHRP	knob-associated histidine-rich protein	0.515028	-0.136553	0.378475	-0.41976	0.146654	0.52244	0.23451	PF3D7_0202000	544	T	___1	GAT(1)KEAS(0.975)T(0.011)S(0.014)K	3	TNKGQCAAEGATKGATKEASTSKEATKEAST
PF3D7_1021700		conserved Plasmodium membrane protein, unknown function	0.513638	1.68431	2.19795	1.76987	1.59875	2.15755	2.23835	PF3D7_1021700	2091	S	___1	S(1)KEQFEDIINSNTK	1	NHHVKITNKQIKRSKSKEQFEDIINSNTKKT
PF3D7_0420300	ApiAP2	AP2 domain transcription factor, putative	0.512997	3.2859	3.7989	3.47626	3.09554	3.84379	3.75401	PF3D7_0420300	1281	S	___1	NEKCES(1)ESYLPNKLK	6	HDKYNELFVKNEKCESESYLPNKLKNKKKVS
PF3D7_0606000	KIC1	conserved Plasmodium protein, unknown function	0.512958	-0.372337	0.14062	-0.31572	-0.428955	0.0805511	0.200689	PF3D7_0606000	550	S	___1	SLLFS(1)DKNK	5	DSFKRQESVSKSLLFSDKNKQIEPIEISKND
PF3D7_0529800		conserved Plasmodium protein, unknown function	0.512888	2.46185	2.97474	2.41699	2.50672	2.97577	2.97371	PF3D7_0529800	1065	S	___1	KYNS(1)YEK	4	AAYNNFHLEAQKKYNSYEKVIDNLKKEIDEL
PF3D7_0606000	KIC1	conserved Plasmodium protein, unknown function	0.512753	0.178878	0.69163	0.27775	0.0800056	0.65221	0.73105	PF3D7_0606000	735	S	___1	IEDVCS(0.977)LS(0.023)KEEEDALINIDR	6	SGHEKKKEIKIEDVCSLSKEEEDALINIDRN
PF3D7_0815800	VPS9	vacuolar protein sorting-associated protein 9, putative	0.512678	0.373247	0.885925	0.52338	0.223114	0.805441	0.96641	PF3D7_0815800	1725	S	___1	TTFLNIS(1)DDEYKEK	7	IEFIKELGKTTFLNISDDEYKEKVANAEKSY
PF3D7_0820000	SRCAP	Snf2-related CBP activator, putative	0.512653	-3.49393	-2.98128	-3.44439	-3.54348	-3.0311	-2.93146	PF3D7_0820000	316	S	___1	S(0.013)GDNS(0.987)IGEDDNNNDEK	5	NVIETSHNDEKSGDNSIGEDDNNNDEKGGDN
PF3D7_0905400	RhopH3	high molecular weight rhoptry protein 3	0.512507	-4.10882	-3.59631	-4.2803	-3.93734	-3.47327	-3.71935	PF3D7_0905400	798	S	___1	S(0.007)T(0.007)S(0.007)AAS(0.776)T(0.153)S(0.032)DEIS(0.004)GS(0.004)EGPS(0.004)T(0.004)ES(0.001)T(0.001)STGNQGEDK	6	YMGPLKEQSKSTSAASTSDEISGSEGPSTES
PF3D7_1222300	GRP94	endoplasmin, putative	0.512418	1.0916	1.60402	1.08711	1.09608	1.52361	1.68442	PF3D7_1222300	542	S	___1	S(0.973)IS(0.027)LDTYIEHMKPDQK	1	KIAKLLLFKTMQYPKSISLDTYIEHMKPDQK
PF3D7_1022400	SRSF4	serine/arginine-rich splicing factor 4	0.512178	1.17261	1.68479	1.06627	1.27894	1.62485	1.74472	PF3D7_1022400	213	S	___1	RY(0.002)S(0.998)NES(1)GLS(1)DR	9	PKYKKRRRYSNESGLSDRDRSRSRRYSKSSN
PF3D7_1339600		conserved Plasmodium protein, unknown function	0.511443	-0.365453	0.14599	-0.24725	-0.483656	0.14925	0.142731	PF3D7_1339600	443	Y	___1	QQGLAQIQKY(1)LNK	10	EENYYKQQGLAQIQKYLNKINSTYFLGKKKN
PF3D7_1230200		vacuolar transporter chaperone, putative, pseudogene	0.510198	-0.729522	-0.219324	-0.619999	-0.839045	-0.0996189	-0.339029	PF3D7_1230200	937	S	___2	FNKYS(1)NNFKDIS(1)IK	5	IYSNNNNNINKFNKYSNNFKDISIKNTSLIY
PF3D7_1230200		vacuolar transporter chaperone, putative, pseudogene	0.510198	-0.729522	-0.219324	-0.619999	-0.839045	-0.0996189	-0.339029	PF3D7_1230200	944	S	___2	YSNNFKDIS(1)IK	9	NINKFNKYSNNFKDISIKNTSLIYDNNLYEP
PF3D7_1227700	KIC2	conserved Plasmodium protein, unknown function	0.509732	0.0386629	0.548395	-0.0441399	0.121466	0.48843	0.60836	PF3D7_1227700	238	S	___1	SILISQNEEIAS(1)LNEELKK	12	SKMKSILISQNEEIASLNEELKKKSKEIFYL
PF3D7_1149000	Pf332	antigen 332, DBL-like protein	0.509652	2.16115	2.6708	2.15688	2.16542	2.62108	2.72053	PF3D7_1149000	277	S	___1	DLDS(0.003)NS(0.997)DKDGIVSESYK	6	AGNKNSNNLKDLDSNSDKDGIVSESYKATKK
PF3D7_0813300		conserved Plasmodium protein, unknown function	0.509238	-2.32167	-1.81243	-2.41	-2.23334	-1.80432	-1.82054	PF3D7_0813300	130	S	___1	NT(0.005)LKNS(0.992)LS(0.003)NGISK	6	NDEVRMLTKKNTLKNSLSNGISKRKKNLENN
PF3D7_1027300	nPrx	peroxiredoxin	0.509203	0.571632	1.08084	0.520941	0.622324	1.06921	1.09246	PF3D7_1027300	53	T	___1	ANT(1)PGCTK	3	ENNEGIVVFTYPKANTPGCTKQAELFKEKHE
PF3D7_0221200		Plasmodium exported protein (hyp15), unknown function	0.509182	-3.13171	-2.62253	-3.19592	-3.0675	-2.5972	-2.64786	PF3D7_0221200	60	T	___1	HT(0.995)LT(0.005)NSSLR	2	TRSLAEYGKEEFMKHTLTNSSLRNETILNDK
PF3D7_0517300	SR1	serine/arginine-rich splicing factor 1	0.508892	1.24817	1.75706	1.18445	1.31189	1.80787	1.70625	PF3D7_0517300	253	T	___1	RDT(1)YDK	3	SSSRSRSRSMDRRRDTYDKKRSYSRSLSYQE
PF3D7_1347500	ALBA4	DNA/RNA-binding protein Alba 4	0.507897	-1.31221	-0.804315	-1.28395	-1.34048	-0.72666	-0.881969	PF3D7_1347500	114	S	___2	IS(1)PGYVSFHEK	2	KIYMEKHPEFKGSRISPGYVSFHEKTDSFTP
PF3D7_1347500	ALBA4	DNA/RNA-binding protein Alba 4	0.507897	-1.31221	-0.804315	-1.28395	-1.34048	-0.72666	-0.881969	PF3D7_1347500	119	S	___2	ISPGYVS(1)FHEK	7	KHPEFKGSRISPGYVSFHEKTDSFTPIYDEN
PF3D7_0905400	RhopH3	high molecular weight rhoptry protein 3	0.507783	4.54299	5.05078	4.68601	4.39997	4.95828	5.14327	PF3D7_0905400	754	S	___1	QHS(1)AHFLDAIAEKDILEEK	3	ETVDEDAHHVNEKQHSAHFLDAIAEKDILEE
PF3D7_0820200	PGPS	phosphatidylglycerophosphate synthase	0.507762	-1.13079	-0.623025	-1.08871	-1.17286	-0.5599	-0.68615	PF3D7_0820200	275	S	___1	MLNS(0.959)FS(0.021)T(0.021)DIFDKDTYNNK	4	NNKYSYTSNEFRMLNSFSTDIFDKDTYNNKN
PF3D7_1362700		conserved Plasmodium protein, unknown function	0.507582	1.16143	1.66901	1.14367	1.1792	1.56913	1.7689	PF3D7_1362700	935	S	___1	IFVKS(1)CDENIMK	5	EENTGANNKEKIFVKSCDENIMKNYQHPENI
PF3D7_1036900		conserved Plasmodium protein, unknown function	0.507447	3.55248	4.05993	3.61774	3.48722	4.01964	4.10021	PF3D7_1036900	541	T	___2	LNYDMT(0.098)T(0.902)IT(1)EETNEFDHDVNKK	9	DPYTGQKLNYDMTTITEETNEFDHDVNKKVI
PF3D7_1134600		zinc finger protein, putative	0.506883	-2.19302	-1.68614	-2.13838	-2.24767	-1.71275	-1.65953	PF3D7_1134600	1193	S	___1	NS(0.594)S(0.405)NNKNQNGTGNISK	2	LGYKSCSCVHNIIRNSSNNKNQNGTGNISKK
PF3D7_1227700	KIC2	conserved Plasmodium protein, unknown function	0.506748	-2.77184	-2.26509	-2.69902	-2.84467	-2.26751	-2.26268	PF3D7_1227700	106	S	___1	ECNDS(1)HKDIS(0.984)LS(0.016)R	10	ILPIVKECNDSHKDISLSRNENSIHNISENS
PF3D7_0706500		conserved Plasmodium protein, unknown function	0.506324	-0.141208	0.365116	-0.23353	-0.0488853	0.267431	0.462801	PF3D7_0706500	707	S	___1	KS(0.076)S(0.914)NDY(0.01)EK	3	ITGEDVVLKDENKKSSNDYEKQNIDMHEPKA
PF3D7_1132400		conserved Plasmodium membrane protein, unknown function	0.506143	-0.900123	-0.39398	-0.98151	-0.818735	-0.37921	-0.408751	PF3D7_1132400	444	S	___1	KENFEENMS(1)GLVK	9	LDFSEGKKENFEENMSGLVKNNYTDYNYYED
PF3D7_0501200	PIESP2	parasite-infected erythrocyte surface protein	0.505928	-1.98029	-1.47436	-1.91691	-2.04366	-1.47759	-1.47113	PF3D7_0501200	269	T	___1	QES(0.119)RT(0.88)LILGS(0.001)FPQAGEILR	5	VGQAPPEKEIRQESRTLILGSFPQAGEILRE
PF3D7_1356000		conserved Plasmodium protein, unknown function	0.504778	0.304203	0.808981	0.37421	0.234196	0.731571	0.886391	PF3D7_1356000	1236	S	___1	YDNDIHYYS(1)DCTYEK	9	LSAYTNKYDNDIHYYSDCTYEKMIDIKKNKK
PF3D7_1357100		elongation factor 1-alpha	0.504563	-0.0118628	0.492701	-0.14242	0.118694	0.476421	0.50898	PF3D7_1357100;PF3D7_1357000	46;46	S	___1	FEKES(1)AEMGK	5	LGGIDRRTIEKFEKESAEMGKGSFKYAWVLD
PF3D7_0320000	I2	protein phosphatase inhibitor 2	0.504247	-2.24872	-1.74448	-2.22985	-2.2676	-1.62158	-1.86737	PF3D7_0320000	48	S	___1	ILEPNTPFNFILMDS(1)AS(0.999)EDEAS(0.001)K	15	KILEPNTPFNFILMDSASEDEASKYGDVKGS
PF3D7_0212800	MATE	multidrug efflux pump, putative	0.503882	-0.940277	-0.436395	-0.943159	-0.937395	-0.410749	-0.46204	PF3D7_0212800	387	S	___1	S(0.175)S(0.823)YNIT(0.001)T(0.001)K	2	GHIRNNSIYPLSHKSSYNITTKGHTNQLEDE
PF3D7_0708800	HSP110c	heat shock protein 110	0.503852	0.442293	0.946145	0.45437	0.430216	0.90509	0.9872	PF3D7_0708800	862	S	___2	NNEEKENS(0.986)T(0.014)KNENSANPEE	8	EEQNNEAKNNEEKENSTKNENSANPEE____
PF3D7_0812500		RNA-binding protein, putative	0.503708	-2.32344	-1.81973	-2.25159	-2.39528	-1.86449	-1.77497	PF3D7_0812500	26	T	___2	LEEERS(0.451)NT(0.557)CEET(0.986)EQVEET(0.005)S(0.001)NNK	12	SEERLEEERSNTCEETEQVEETSNNKRGRKQ
PF3D7_1346300	ALBA2	DNA/RNA-binding protein Alba 2	0.503704	5.30365	5.80735	5.47933	5.12796	5.92236	5.69234	PF3D7_1346300	7	S	___1	S(0.999)DT(0.001)KLENEIR	1	_________MPGSTKSDTKLENEIRISYKSD
PF3D7_1229000		conserved Plasmodium membrane protein, unknown function	0.503143	1.25911	1.76226	1.33019	1.18803	1.83146	1.69305	PF3D7_1229000	664	S	___1	IRNS(1)CEEDEENEK	4	DNINNNNLNDNKIRNSCEEDEENEKKKKKRK
PF3D7_1360400		conserved Plasmodium protein, unknown function	0.503132	-2.5726	-2.06947	-2.62434	-2.52086	-2.01131	-2.12763	PF3D7_1360400	178	T	___1	THNDNDNT(0.983)S(0.015)ET(0.002)SK	8	SSNEVFLKTHNDNDNTSETSKIINMDDDIIK
PF3D7_0322900	RPS3A	40S ribosomal protein S3A, putative	0.503088	1.11871	1.6218	1.21411	1.0233	1.61023	1.63336	PF3D7_0322900	87	S	___1	LS(1)CDHIINR	2	DLNNDEDQAHKKIKLSCDHIINRDCYTDFCG
PF3D7_1225800	UBA1	ubiquitin-activating enzyme E1	0.502923	-0.0372524	0.465671	-0.0156593	-0.0588455	0.448931	0.48241	PF3D7_1225800	384	S	___1	GLPENS(1)DEDALEK	6	LKWYELQNEKGLPENSDEDALEKIYNYAVTL
PF3D7_1127800		conserved Plasmodium protein, unknown function	0.502478	0.770908	1.27339	0.769251	0.772566	1.14366	1.40311	PF3D7_1127800	836	S	___2	AIS(1)DDNQNK	3	NIMEDQNVVASEKAISDDNQNKNISKNIKKK
PF3D7_1127800		conserved Plasmodium protein, unknown function	0.502478	0.770908	1.27339	0.769251	0.772566	1.14366	1.40311	PF3D7_1127800	831	S	___2	ISDITNIMEDQNVVAS(1)EKAIS(1)DDNQNK	16	ISDITNIMEDQNVVASEKAISDDNQNKNISK
PF3D7_1227200	K1	potassium channel	0.502373	-1.36562	-0.86325	-1.26992	-1.46132	-0.727119	-0.99938	PF3D7_1227200	345	S	___1	DS(0.5)AS(0.5)LDNIQIFLGHR	2	FNINMNKDDDLMMKDSASLDNIQIFLGHRSS
PF3D7_1138500	PPM2	protein phosphatase PPM2	0.502118	-2.08868	-1.58656	-1.93554	-2.24182	-1.64018	-1.53294	PF3D7_1138500	780	S	___1	FEEIPDDPNNSLDNT(0.132)ENS(0.732)EHMNT(0.132)NNNS(0.005)DQNEK	18	EIPDDPNNSLDNTENSEHMNTNNNSDQNEKL
PF3D7_0624600	ISWI	SNF2 helicase, putative	0.502117	-1.86666	-1.36454	-1.4854	-2.24792	-1.18317	-1.54591	PF3D7_0624600	2102	S	___1	LTHFLSNQPLT(0.013)IS(0.221)S(0.762)DY(0.001)S(0.003)DT(0.001)KDIIEIR	14	AKLTHFLSNQPLTISSDYSDTKDIIEIRSDL
PF3D7_0812500		RNA-binding protein, putative	0.501873	0.0413675	0.543241	0.22451	-0.141775	0.532721	0.553761	PF3D7_0812500	22	T	___2	LEEERS(1)NT(1)CEETEQVEETSNNK	8	RKKKSEERLEEERSNTCEETEQVEETSNNKR
PF3D7_1471100	EXP2	exported protein 2	0.501587	3.98172	4.4833	4.03869	3.92475	4.54109	4.42552	PF3D7_1471100	216	S	___1	LKS(1)MESK	3	CTLKHLSSYMEEKLKSMESKKNIESGKYEFD
PF3D7_1478600	PTP3	EMP1-trafficking protein	0.501468	-2.36728	-1.86581	-2.34226	-2.3923	-1.81639	-1.91523	PF3D7_1478600	481	T	___1	KGT(1)NPFMDEDELEELLR	3	DKTKLEDNTKQIKKGTNPFMDEDELEELLRL
PF3D7_1460700	RPL27	60S ribosomal protein L27	0.500287	-2.16666	-1.66637	-2.15723	-2.17608	-1.75038	-1.58236	PF3D7_1460700	95	S	___1	YQVANDFDIKS(1)LAS(1)DDVLK	11	ILPTRYQVANDFDIKSLASDDVLKSKNKKKE
PF3D7_1340600	DBR1	RNA lariat debranching enzyme, putative	0.499813	0.489673	0.989486	0.521311	0.458035	0.906931	1.07204	PF3D7_1340600	325	S	___1	TNTCNNNDHHNDDS(1)INLDYDHEK	14	TKTNTCNNNDHHNDDSINLDYDHEKALYELD
PF3D7_1200700	ACS7	acyl-CoA synthetase	0.499263	3.87765	4.37691	3.92709	3.82821	4.44426	4.30957	PF3D7_1200700	771	S	___1	S(0.016)GS(0.984)KDDIK	3	KSDIKGGSKDDIKSGSKDDIKSGSKADIKSG
PF3D7_1227700	KIC2	conserved Plasmodium protein, unknown function	0.498508	-0.517697	-0.0191889	-0.473989	-0.561405	-0.0474987	0.00912094	PF3D7_1227700	678	T	___2	NIT(0.534)IGS(0.466)LADT(1)EKR	3	ENSVYTSKKSYDKNITIGSLADTEKRSIKIK
PF3D7_0500800	MESA	mature parasite-infected erythrocyte surface antigen	0.498437	2.09471	2.59315	2.20085	1.98857	2.53582	2.65048	PF3D7_0500800	355	S	___1	VSGPYENSENSNVT(0.001)S(0.999)ESEETK	15	KVSGPYENSENSNVTSESEETKKLAEKEENE
PF3D7_0815800	VPS9	vacuolar protein sorting-associated protein 9, putative	0.498397	2.5059	3.0043	2.58203	2.42978	2.9192	3.0894	PF3D7_0815800	303	S	___1	S(0.004)S(0.006)S(0.989)DFIQNEY(0.001)FK	3	NINNNNNSNNKQRSSSDFIQNEYFKTHNKTY
PF3D7_1227700	KIC2	conserved Plasmodium protein, unknown function	0.498003	0.740402	1.23841	0.7332	0.747604	1.19677	1.28004	PF3D7_1227700	54	S	___1	ETNENIS(1)HLNYNEACPNSIIEK	7	EENIIDMKKETNENISHLNYNEACPNSIIEK
PF3D7_1004400		RNA-binding protein, putative	0.497787	-2.54063	-2.04284	-2.48054	-2.60071	-2.14353	-1.94215	PF3D7_1004400	657	T	___2	S(0.469)S(0.531)EEVGEHT(0.562)NS(0.438)IINEDINK	9	NKKRILKSSEEVGEHTNSIINEDINKDQTDI
PF3D7_0935900	REX1	ring-exported protein 1	0.497232	-1.29436	-0.797124	-1.27523	-1.31348	-0.862019	-0.732229	PF3D7_0935900	569	S	___1	TENQS(1)GELLTQAEK	5	KPQAEKDALAKTENQSGELLTQAEKDALAKK
PF3D7_1110400		RNA-binding protein, putative	0.496392	-2.0321	-1.5357	-1.91624	-2.14795	-1.60334	-1.46807	PF3D7_1110400	1039	S	___1	KTTDETENNNVENNEANGDS(1)NANAASGK	20	ETENNNVENNEANGDSNANAASGKSQKIDIL
PF3D7_1411500		conserved Plasmodium protein, unknown function	0.496302	-3.62361	-3.12731	-3.44221	-3.80501	-3.42499	-2.82962	PF3D7_1411500	458	S	___2	IET(0.247)QS(0.75)INS(0.999)VNDT(0.004)Y(0.001)LLNR	5	IVERENEMNNKIETQSINSVNDTYLLNRKNE
PF3D7_1411500		conserved Plasmodium protein, unknown function	0.496302	-3.62361	-3.12731	-3.44221	-3.80501	-3.42499	-2.82962	PF3D7_1411500	461	S	___2	IET(0.247)QS(0.75)INS(0.999)VNDT(0.004)Y(0.001)LLNR	8	RENEMNNKIETQSINSVNDTYLLNRKNENNM
PF3D7_1339300		conserved Plasmodium protein, unknown function	0.496017	0.0728273	0.568845	0.0881805	0.0574741	0.62998	0.50771	PF3D7_1339300	115	T	___1	S(0.024)FS(0.025)Y(0.022)S(0.099)EES(0.202)KT(0.664)CS(0.716)DNT(0.245)HNEDGS(0.004)K	10	IKKELKSFSYSEESKTCSDNTHNEDGSKKQN
PF3D7_0716000		RNA-binding protein, putative	0.495837	-2.71183	-2.21599	-2.63176	-2.79189	-2.16363	-2.26835	PF3D7_0716000	90	S	___1	NS(1)QNEEMNNDNKNNDNDDQDDEHNSK	2	YNNEDGNIIKKKKKNSQNEEMNNDNKNNDND
PF3D7_0606000	KIC1	conserved Plasmodium protein, unknown function	0.495502	0.615728	1.11123	0.743052	0.488405	1.11908	1.10338	PF3D7_0606000	737	S	___1	IEDVCS(0.002)LS(0.998)KEEEDALINIDR	8	HEKKKEIKIEDVCSLSKEEEDALINIDRNHV
PF3D7_1140700		conserved Plasmodium protein, unknown function	0.495428	1.15869	1.65412	1.22145	1.09592	1.60036	1.70787	PF3D7_1140700	82	Y	___1	NY(0.579)DS(0.421)DENTWEPFENLSPNLK	2	DENLDDFEFYIKWKNYDSDENTWEPFENLSP
PF3D7_0921600		tetratricopeptide repeat protein, putative	0.495043	-3.55431	-3.05927	-3.3489	-3.75973	-3.01632	-3.10222	PF3D7_0921600	1620	S	___1	NIINVEEENS(0.991)S(0.991)FEES(0.018)R	11	TPSNKNIINVEEENSSFEESRNYESSDNSSD
PF3D7_1149000	Pf332	antigen 332, DBL-like protein	0.494682	0.424377	0.91906	0.54401	0.304745	0.99012	0.848	PF3D7_1149000	3066	S	___1	EGS(0.987)AT(0.013)EEIVQDGSGTNDFVGK	3	IRDETNVEEVLEKEGSATEEIVQDGSGTNDF
PF3D7_1345400		conserved Plasmodium protein, unknown function	0.494553	-0.779757	-0.285205	-0.65481	-0.904705	-0.45985	-0.110559	PF3D7_1345400	244	S	___2	HQNS(1)DDKNDDDS(1)LNDNPDNDYGANDDKENNR	4	SDDDINNIYDEKHQNSDDKNDDDSLNDNPDN
PF3D7_1345400		conserved Plasmodium protein, unknown function	0.494553	-0.779757	-0.285205	-0.65481	-0.904705	-0.45985	-0.110559	PF3D7_1345400	252	S	___2	HQNS(1)DDKNDDDS(1)LNDNPDNDYGANDDKENNR	12	YDEKHQNSDDKNDDDSLNDNPDNDYGANDDK
PF3D7_0500800	MESA	mature parasite-infected erythrocyte surface antigen	0.494409	-1.43325	-0.938839	-1.46373	-1.40277	-0.896639	-0.981039	PF3D7_0500800	348	S	___2	VS(0.001)GPY(0.004)ENS(0.931)ENS(0.851)NVT(0.172)S(0.04)ES(0.002)EETKK	8	SKDREGNKVSGPYENSENSNVTSESEETKKL
PF3D7_0500800	MESA	mature parasite-infected erythrocyte surface antigen	0.494409	-1.43325	-0.938839	-1.46373	-1.40277	-0.896639	-0.981039	PF3D7_0500800	351	S	___2	VSGPY(0.002)ENS(0.894)ENS(0.887)NVT(0.492)S(0.517)ES(0.105)EET(0.104)KK	11	REGNKVSGPYENSENSNVTSESEETKKLAEK
PF3D7_0110400	RPB9	DNA-directed RNA polymerase II subunit RPB9, putative	0.494292	-3.0603	-2.566	-3.21525	-2.90534	-2.63113	-2.50088	PF3D7_0110400	130	S	___1	EAQQINDDNY(0.003)FNS(0.997)EK	13	WEKEAQQINDDNYFNSEKSSDISEDQDLLNN
PF3D7_0500800	MESA	mature parasite-infected erythrocyte surface antigen	0.493937	-3.41305	-2.91911	-3.1615	-3.66459	-2.94536	-2.89286	PF3D7_0500800	431	S	___1	KS(1)FFQMLGCNFLCNK	2	EKKADNKKKSKKKKKSFFQMLGCNFLCNKNI
PF3D7_1308200	cpsSII	carbamoyl phosphate synthetase	0.493798	-1.22769	-0.733894	-1.05986	-1.39552	-0.7335	-0.734289	PF3D7_1308200	1373	S	___2	EEKS(1)IGS(0.995)DDT(0.006)NILSAQNSNNNFSCNNENMNK	4	SERAGSHHIYGKEEKSIGSDDTNILSAQNSN
PF3D7_1308200	cpsSII	carbamoyl phosphate synthetase	0.493798	-1.22769	-0.733894	-1.05986	-1.39552	-0.7335	-0.734289	PF3D7_1308200	1376	S	___2	EEKS(1)IGS(0.995)DDT(0.006)NILSAQNSNNNFSCNNENMNK	7	AGSHHIYGKEEKSIGSDDTNILSAQNSNNNF
PF3D7_0209100	PATPL1	phospholipase A2, putative	0.493773	-3.33557	-2.84179	-3.1837	-3.48744	-2.71861	-2.96498	PF3D7_0209100	218	S	___2	YNLDQTDILLDDS(1)NS(1)ERRR	13	ICKYNLDQTDILLDDSNSERRRNSKFKIKNT
PF3D7_0209100	PATPL1	phospholipase A2, putative	0.493773	-3.33557	-2.84179	-3.1837	-3.48744	-2.71861	-2.96498	PF3D7_0209100	220	S	___2	YNLDQTDILLDDS(1)NS(1)ERRR	15	KYNLDQTDILLDDSNSERRRNSKFKIKNTNY
PF3D7_0936800		Plasmodium exported protein (PHISTc), unknown function	0.493354	1.94149	2.43485	2.03413	1.84885	2.34937	2.52032	PF3D7_0936800	87	S	___1	SLS(1)DEINK	3	SHSTSDPKKNEEKSLSDEINKCDMKKYTAEE
PF3D7_0402400	GEXP18	Plasmodium exported protein, unknown function	0.493027	1.62043	2.11345	1.5591	1.68176	2.16703	2.05988	PF3D7_0402400	166	S	___1	LDELKS(1)YINTNDDENQK	6	INEKNRNNDKLDELKSYINTNDDENQKKLWN
PF3D7_1445700		conserved Plasmodium protein, unknown function	0.492188	-2.89029	-2.3981	-3.01133	-2.76925	-2.04839	-2.74782	PF3D7_1445700	303	S	___1	S(0.516)Y(0.394)RS(0.09)FKK	1	LEEGGRVDRLPGFRRSYRSFKKVDEGNWNNK
PF3D7_0825500	KRI1	protein KRI1, putative	0.492048	-1.72636	-1.23431	-1.71581	-1.73691	-1.22824	-1.24038	PF3D7_0825500	215	S	___1	EGS(1)QAFEKEEEELLNK	3	LNYSEYYKDILLKEGSQAFEKEEEELLNKEK
PF3D7_1115800		conserved Plasmodium protein, unknown function	0.491807	-0.00771713	0.48409	0.155521	-0.170956	0.56296	0.40522	PF3D7_1115800	241	S	___1	NVVS(0.999)EEQS(0.001)INKDTK	4	TDASIKKNEKVKNVVSEEQSINKDTKKTDTK
PF3D7_0610200	RBM25	RNA-binding protein 25, putative	0.490948	-3.94217	-3.45122	-3.86098	-4.02336	-3.4491	-3.45334	PF3D7_0610200	780	T	___1	NFHSEYLQNINDQSTLNILDT(0.995)NDEYT(0.004)YLEEK	21	YLQNINDQSTLNILDTNDEYTYLEEKGKKTN
PF3D7_1466900		rhoptry protein, putative	0.489887	-1.70864	-1.21875	-1.60484	-1.81244	-1.2496	-1.18791	PF3D7_1466900	1176	S	___1	NLNIS(0.971)QNDEVS(0.028)ENKNIY(0.001)FNLFFGK	5	NVNVVSNEQFKNLNISQNDEVSENKNIYFNL
PF3D7_0934800	PKAc	cAMP-dependent protein kinase catalytic subunit	0.489463	-3.23817	-2.74871	-3.39553	-3.08082	-2.65325	-2.84417	PF3D7_0934800	266	S	___1	LLS(1)HDLTK	3	KFLDNNCKHLMKKLLSHDLTKRYGNLKKGAQ
PF3D7_0215300	ACS8	acyl-CoA synthetase	0.488442	-0.200413	0.28803	-0.2286	-0.172226	0.37756	0.1985	PF3D7_0215300	855	S	___1	S(0.955)T(0.044)DAS(0.001)LKIPEK	1	QQNNMSNITLKNTLKSTDASLKIPEKNKVQT
PF3D7_1312800		conserved Plasmodium protein, unknown function	0.487957	-3.69002	-3.20206	-3.57777	-3.80227	-3.34901	-3.05512	PF3D7_1312800	1870	S	___2	S(0.001)VQGIY(0.037)T(0.036)NDIILHS(0.634)FS(0.634)DES(0.634)DLEEGY(0.024)EQK	14	NKSVQGIYTNDIILHSFSDESDLEEGYEQKN
PF3D7_1312800		conserved Plasmodium protein, unknown function	0.487957	-3.69002	-3.20206	-3.57777	-3.80227	-3.34901	-3.05512	PF3D7_1312800	1872	S	___2	S(0.001)VQGIY(0.037)T(0.036)NDIILHS(0.634)FS(0.634)DES(0.634)DLEEGY(0.024)EQK	16	SVQGIYTNDIILHSFSDESDLEEGYEQKNKT
PF3D7_1312800		conserved Plasmodium protein, unknown function	0.487957	-3.69002	-3.20206	-3.57777	-3.80227	-3.34901	-3.05512	PF3D7_1312800	1875	S	___2	S(0.001)VQGIY(0.037)T(0.036)NDIILHS(0.634)FS(0.634)DES(0.634)DLEEGY(0.024)EQK	19	GIYTNDIILHSFSDESDLEEGYEQKNKTYNN
PF3D7_0511300		MORN repeat protein, putative	0.487742	-1.24187	-0.754129	-1.13524	-1.34851	-0.67141	-0.836849	PF3D7_0511300	705	S	___1	ENYS(1)EELNFIKDR	4	DDEDDIYIINLKENYSEELNFIKDRERLESY
PF3D7_1328000		conserved Plasmodium protein, unknown function	0.487652	-1.66107	-1.17342	-1.68794	-1.6342	-1.23671	-1.11013	PF3D7_1328000	1914	S	___1	NDDS(0.5)ES(0.5)NHNCYNNYK	4	DEKYKNNNNNYRNDDSESNHNCYNNYKGYNN
PF3D7_1328000		conserved Plasmodium protein, unknown function	0.487652	-1.66107	-1.17342	-1.68794	-1.6342	-1.23671	-1.11013	PF3D7_1328000	1916	S	___1	NDDS(0.5)ES(0.5)NHNCYNNYK	6	KYKNNNNNYRNDDSESNHNCYNNYKGYNNDT
PF3D7_1356000		conserved Plasmodium protein, unknown function	0.487528	-0.871227	-0.383699	-0.80225	-0.940205	-0.295099	-0.4723	PF3D7_1356000	1127	S	___1	T(0.001)CS(0.999)LNVIGGFLK	3	TFVKNKRGHILRKTCSLNVIGGFLKSKEKFI
PF3D7_1125800		kelch domain-containing protein, putative	0.487178	-0.741922	-0.254745	-0.91844	-0.565405	0.18329	-0.69278	PF3D7_1125800	591	S	___1	LETSNVLMKHDS(1)I	12	RIRKLETSNVLMKHDSI______________
PF3D7_1123900	SNU13	splicing factor, putative	0.486913	-2.55104	-2.06413	-2.78367	-2.31841	-2.27749	-1.85077	PF3D7_1123900	10	S	___1	S(0.02)NT(0.02)LIS(0.052)NES(0.934)VHNS(0.974)EVEEEEEEINAK	9	______MSNTLISNESVHNSEVEEEEEEINA
PF3D7_0702500		Plasmodium exported protein, unknown function	0.486903	-2.79747	-2.31056	-2.79415	-2.80079	-2.36334	-2.25779	PF3D7_0702500	146	T	___2	NNS(0.059)DGS(0.416)T(0.525)ENHLSGSNSDGR	7	GQKESQLYKNNSDGSTENHLSGSNSDGRNSS
PF3D7_0209800	UAP56	ATP-dependent RNA helicase UAP56	0.486543	-1.62109	-1.13455	-1.62839	-1.61379	-1.09731	-1.17179	PF3D7_0209800	73	S	___1	AIS(0.157)ES(0.746)GFEHPS(0.098)EVQQETIPAAITGTDILCQAK	5	KDFFLKPELLRAISESGFEHPSEVQQETIPA
PF3D7_1442400	KIC9	conserved Plasmodium protein, unknown function	0.485433	-2.69728	-2.21184	-2.53378	-2.86077	-2.36276	-2.06093	PF3D7_1442400	1794	S	___2	FLY(0.008)FAVPLMS(0.902)QDKS(0.904)CDY(0.186)NINDEEKNK	10	FSNNQKFLYFAVPLMSQDKSCDYNINDEEKN
PF3D7_1442400	KIC9	conserved Plasmodium protein, unknown function	0.485433	-2.69728	-2.21184	-2.53378	-2.86077	-2.36276	-2.06093	PF3D7_1442400	1798	S	___2	FLY(0.008)FAVPLMS(0.902)QDKS(0.904)CDY(0.186)NINDEEKNK	14	QKFLYFAVPLMSQDKSCDYNINDEEKNKEIK
PF3D7_1447900	MDR2	multidrug resistance protein 2	0.485387	-0.193077	0.29231	-0.398849	0.0126953	0.41477	0.169849	PF3D7_1447900	300	S	___1	RYGS(1)NK	4	NKIDVKESFLNKRYGSNKRSSKIYDNNNNNN
PF3D7_1140700		conserved Plasmodium protein, unknown function	0.485052	-0.474707	0.0103455	-0.622019	-0.327394	-0.01017	0.0308609	PF3D7_1140700	1000	S	___1	SYS(1)NNSAYVNR	3	GKNIVKNLFCNKKSYSNNSAYVNRGISEYAE
PF3D7_1039000	FIKK10.2	serine/threonine protein kinase, FIKK family	0.484776	-0.443892	0.040885	-0.382769	-0.505014	-0.0826893	0.164459	PF3D7_1039000	151	Y	___1	KGKS(0.001)NLY(0.999)HNGK	7	RRGKLREKKKGKSNLYHNGKNKKNVSNCKKH
PF3D7_0401800	PfD80	Plasmodium exported protein (PHISTb), unknown function	0.483723	-1.44612	-0.962399	-1.40564	-1.4866	-1.14132	-0.78348	PF3D7_0401800	316	S	___1	EAES(1)VDDNNKEGNES(0.98)DNIY(0.004)CMLCS(0.006)S(0.006)NT(0.005)R	4	GSNVDITEEEEKEAESVDDNNKEGNESDNIY
PF3D7_1365800		conserved Plasmodium protein, unknown function	0.483657	0.133958	0.617615	0.248781	0.0191345	0.61944	0.615789	PF3D7_1365800	14	S	___1	KS(0.049)S(0.902)ES(0.049)LKEDDEFFLER	3	__MKAFVNKIQFRKSSESLKEDDEFFLERKQ
PF3D7_1004400		RNA-binding protein, putative	0.483633	-2.24803	-1.76439	-2.10799	-2.38807	-1.46714	-2.06165	PF3D7_1004400	421	S	___1	SHFHLKVS(1)R	8	YGYKNDNRSHFHLKVSRNYSPPNFSNESIER
PF3D7_1248700		conserved Plasmodium protein, unknown function	0.482168	0.108482	0.590651	0.20957	0.00739479	0.562141	0.61916	PF3D7_1248700	1159	S	___1	NAQKGS(1)VDDLEAWK	6	NDRSFRLAARNAQKGSVDDLEAWKLNEGSLG
PF3D7_1333800		conserved Plasmodium protein, unknown function	0.482147	-2.0734	-1.59125	-2.13974	-2.00706	-1.55595	-1.62655	PF3D7_1333800	29	S	___1	GDFEPVLY(0.009)KGS(0.933)DIEFIY(0.058)NK	11	ISLEKGDFEPVLYKGSDIEFIYNKLNLGEGK
PF3D7_0708400	HSP90	heat shock protein 90	0.481732	6.03512	6.51685	6.0638	6.00644	6.49421	6.53949	PF3D7_0708400	220	S	___2	QNEKEIT(1)AS(1)EEEEGEGEGEREGEEEEEK	9	IKLYCERQNEKEITASEEEEGEGEGEREGEE
PF3D7_0708400	HSP90	heat shock protein 90	0.481732	6.03512	6.51685	6.0638	6.00644	6.49421	6.53949	PF3D7_0708400	218	T	___2	QNEKEIT(1)AS(1)EEEEGEGEGEREGEEEEEK	7	FPIKLYCERQNEKEITASEEEEGEGEGEREG
PF3D7_1033700	BDP1	bromodomain protein 1	0.481717	1.54246	2.02418	1.47886	1.60607	2.01047	2.03789	PF3D7_1033700	19	S	___1	S(0.006)IREDS(0.994)LDDVLK	6	EDFNTLPLIKSIREDSLDDVLKFLENNYKDY
PF3D7_1438400	MCA2	metacaspase-like protein	0.480727	0.994923	1.47565	1.10203	0.887815	1.5289	1.4224	PF3D7_1438400	1302	S	___2	IKS(0.999)VHY(0.001)DMDEILS(1)LK	3	CLDINNKEKKKKKIKSVHYDMDEILSLKCKV
PF3D7_1438400	MCA2	metacaspase-like protein	0.480727	0.994923	1.47565	1.10203	0.887815	1.5289	1.4224	PF3D7_1438400	1312	S	___2	SVHYDMDEILS(1)LK	11	KKKIKSVHYDMDEILSLKCKVYDELDTCLKC
PF3D7_1149000	Pf332	antigen 332, DBL-like protein	0.480567	1.51673	1.9973	1.60117	1.43229	2.00639	1.9882	PF3D7_1149000	759	S	___1	SVS(1)EEIPVEEK	3	GQLINEEKPVEEKSVSEEIPVEEKSVSEEIP
PF3D7_1134600		zinc finger protein, putative	0.479737	-3.03353	-2.5538	-2.78359	-3.28347	-2.45355	-2.65404	PF3D7_1134600	1164	S	___1	KILET(0.089)LS(0.911)HGK	7	KEKYNEKEKKILETLSHGKMEKHKKNKIVLG
PF3D7_1342900	ApiAP2	AP2 domain transcription factor, putative	0.478184	2.24254	2.72073	2.25465	2.23043	2.65618	2.78527	PF3D7_1342900	3536	S	___1	KSIPLCFS(1)DDEEAKEINDK	8	ITYKKNDKKSIPLCFSDDEEAKEINDKIKKK
PF3D7_1140700		conserved Plasmodium protein, unknown function	0.477558	-0.158117	0.319441	-0.0917492	-0.224485	0.301071	0.337811	PF3D7_1140700	1610	S	___1	SEQDHINDDDNNINS(0.999)Y(0.001)DDESDVNFNNKK	15	RSEQDHINDDDNNINSYDDESDVNFNNKKND
PF3D7_0708800	HSP110c	heat shock protein 110	0.477458	0.758798	1.23626	0.79426	0.723335	1.19309	1.27942	PF3D7_0708800	868	S	___2	NNEEKENSTKNENS(1)ANPEE	14	AKNNEEKENSTKNENSANPEE__________
PF3D7_1107300	PAIP1	polyadenylate-binding protein-interacting protein 1, putative	0.477023	3.55962	4.03665	3.67855	3.44069	4.02146	4.05183	PF3D7_1107300	2060	S	___2	VS(1)DYS(1)NEKNNVR	2	KDEKNLDNYTYNEKVSDYSNEKNNVREDLHE
PF3D7_0606000	KIC1	conserved Plasmodium protein, unknown function	0.476924	1.29352	1.77044	1.2607	1.32633	1.67862	1.86226	PF3D7_0606000	863	S	___1	NDS(1)VMGYREEIK	3	HPDFVEKYLQNKKNDSVMGYREEIKISDEQK
PF3D7_0702500		Plasmodium exported protein, unknown function	0.476868	-0.317448	0.15942	-0.34321	-0.291685	0.20558	0.11326	PF3D7_0702500	145	S	___1	NNS(1)DGS(0.961)T(0.039)ENHLSGSNSDGR	6	DGQKESQLYKNNSDGSTENHLSGSNSDGRNS
PF3D7_0801000		Plasmodium exported protein (PHISTc), unknown function	0.476703	-0.727653	-0.25095	-0.65136	-0.803946	-0.390289	-0.11161	PF3D7_0801000	525	S	___1	SNFDERS(1)QIVEQR	7	GRSQNLEGRSNFDERSQIVEQRRNFDDRDQN
PF3D7_0202000	KAHRP	knob-associated histidine-rich protein	0.476668	-1.29861	-0.821944	-1.40799	-1.18924	-0.732969	-0.910919	PF3D7_0202000	469	S	___1	S(0.833)DGS(0.167)KAHEK	1	TNEENKNKEKTNNSKSDGSKAHEKKENETKN
PF3D7_1473700	NUP116	nucleoporin NUP116/NSP116, putative	0.476638	1.16231	1.63895	1.17378	1.15084	1.63249	1.64541	PF3D7_1473700	10	T	___1	LS(0.071)NVIT(0.848)S(0.081)NK	6	______MSRKLSNVITSNKGNSMELFVNVLN
PF3D7_1107800	ApiAP2	AP2 domain transcription factor, putative	0.476192	1.74208	2.21828	1.80816	1.676	2.19082	2.24573	PF3D7_1107800	889	S	___1	KS(0.001)CNYS(0.999)DENILNK	6	SAVSSGAYHKKSCNYSDENILNKLNVSIDYS
PF3D7_1107300	PAIP1	polyadenylate-binding protein-interacting protein 1, putative	0.475657	3.60346	4.07912	3.71964	3.48729	4.06479	4.09345	PF3D7_1107300	2063	S	___2	VSDYS(1)NEKNNVR	5	KNLDNYTYNEKVSDYSNEKNNVREDLHEDLH
PF3D7_1248500		bax inhibitor 1, putative	0.475628	0.632612	1.10824	0.57019	0.695034	1.07387	1.14261	PF3D7_1248500	27	S	___1	NSIVGQNYGAAYNQGGYNYS(1)QNKDKENYDK	20	GQNYGAAYNQGGYNYSQNKDKENYDKSNSGQ
PF3D7_1356000		conserved Plasmodium protein, unknown function	0.474507	0.639668	1.11417	0.56587	0.713465	1.09292	1.13543	PF3D7_1356000	1217	S	___1	MYS(1)HEALSAYTNK	3	MLNNNKTKPLGHKMYSHEALSAYTNKYDNDI
PF3D7_1022400	SRSF4	serine/arginine-rich splicing factor 4	0.474427	-0.694992	-0.220565	-0.68372	-0.706264	-0.164919	-0.276211	PF3D7_1022400	294	S	___1	SGDRS(0.999)YR	5	VSRSRSDHGSRSGDRSYRKKKNKNESSSDVL
PF3D7_0404600		conserved Plasmodium membrane protein, unknown function	0.474147	-1.57266	-1.09852	-1.58109	-1.56424	-1.09679	-1.10024	PF3D7_0404600	2036	S	___1	FS(0.55)DDS(0.45)DHVDEK	2	RIFISLNNYLKNFKFSDDSDHVDEKHMDDTS
PF3D7_0730900	PTP4	EMP1-trafficking protein	0.473962	2.13682	2.61078	2.22829	2.04535	2.55666	2.66491	PF3D7_0730900	1677	S	___1	S(0.002)FS(0.979)S(0.018)QGIREDFPYENENNK	3	GMKGQKYGSKNIRSFSSQGIREDFPYENENN
PF3D7_1468100		conserved Plasmodium protein, unknown function	0.473778	-1.40883	-0.935055	-1.45366	-1.36401	-1.0174	-0.852711	PF3D7_1468100	2432	S	___2	NAQS(1)PNNDNDQNEVVGANEREDDSTNR	4	ENAQSEKEGKGKNAQSPNNDNDQNEVVGANE
PF3D7_1468100		conserved Plasmodium protein, unknown function	0.473778	-1.40883	-0.935055	-1.45366	-1.36401	-1.0174	-0.852711	PF3D7_1468100	2452	S	___2	NAQSPNNDNDQNEVVGANEREDDS(0.959)T(0.041)NR	24	NDQNEVVGANEREDDSTNRNYNNGKSSNEEE
PF3D7_1118600	MYST	histone acetyltransferase	0.473723	-2.01459	-1.54087	-1.57637	-2.45282	-1.35023	-1.73151	PF3D7_1118600	110	S	___1	S(0.005)DNNNNKS(0.981)DNNNNKS(0.014)DNYNNK	8	NDNNNNNKSDNNNNKSDNNNNKSDNYNNKIG
PF3D7_1123900	SNU13	splicing factor, putative	0.472618	1.63727	2.10989	1.74798	1.52655	2.03852	2.18125	PF3D7_1123900	14	S	___1	SNTLIS(0.128)NES(0.873)VHNS(0.999)EVEEEEEEINAK	13	__MSNTLISNESVHNSEVEEEEEEINAKIFP
PF3D7_0401800	PfD80	Plasmodium exported protein (PHISTb), unknown function	0.472288	0.729608	1.2019	0.791361	0.667854	1.12914	1.27465	PF3D7_0401800	183	S	___3	SASTASTASAASAAS(0.962)T(0.036)T(0.001)R	15	RSASTASTASAASAASTTRSASAASTTRSAS
PF3D7_1359400	CELF1	CUGBP Elav-like family member 1	0.472232	1.86955	2.34178	2.05406	1.68504	2.3188	2.36476	PF3D7_1359400	59	S	___2	S(0.628)S(0.668)S(0.633)DKDENT(0.065)IDY(0.005)GNHDFPCNPAPPVPIK	1	ENLKSSKGKQENNTKSSSDKDENTIDYGNHD
PF3D7_1359400	CELF1	CUGBP Elav-like family member 1	0.472232	1.86955	2.34178	2.05406	1.68504	2.3188	2.36476	PF3D7_1359400	60	S	___2	S(0.628)S(0.668)S(0.633)DKDENT(0.065)IDY(0.005)GNHDFPCNPAPPVPIK	2	NLKSSKGKQENNTKSSSDKDENTIDYGNHDF
PF3D7_1359400	CELF1	CUGBP Elav-like family member 1	0.472232	1.86955	2.34178	2.05406	1.68504	2.3188	2.36476	PF3D7_1359400	61	S	___2	S(0.628)S(0.668)S(0.633)DKDENT(0.065)IDY(0.005)GNHDFPCNPAPPVPIK	3	LKSSKGKQENNTKSSSDKDENTIDYGNHDFP
PF3D7_1347700	ECT	ethanolamine-phosphate cytidylyltransferase	0.471778	3.62628	4.09806	3.61906	3.6335	4.00756	4.18856	PF3D7_1347700	364	S	___1	VS(1)EQQHDIDTLPK	2	YNSELGISDDNKTKVSEQQHDIDTLPKNLLN
PF3D7_0106300	ATP6	calcium-transporting ATPase	0.471738	3.70375	4.17549	3.71908	3.68843	4.17261	4.17837	PF3D7_0106300	492	S	___1	GS(1)KILEDK	2	LKEMKSNENTIISRGSKILEDKINKYCYSEY
PF3D7_1303800		conserved Plasmodium protein, unknown function	0.471377	-2.39641	-1.92503	-2.37111	-2.42171	-1.89277	-1.95729	PF3D7_1303800	1607	S	___2	YMSPYECLLS(0.01)IS(0.2)S(0.594)S(0.616)S(0.579)K	13	KYKYMSPYECLLSISSSSKVKKCNIIDLHEK
PF3D7_1303800		conserved Plasmodium protein, unknown function	0.471377	-2.39641	-1.92503	-2.37111	-2.42171	-1.89277	-1.95729	PF3D7_1303800	1608	S	___2	YMSPYECLLS(0.01)IS(0.2)S(0.594)S(0.616)S(0.579)K	14	YKYMSPYECLLSISSSSKVKKCNIIDLHEKN
PF3D7_1303800		conserved Plasmodium protein, unknown function	0.471377	-2.39641	-1.92503	-2.37111	-2.42171	-1.89277	-1.95729	PF3D7_1303800	1609	S	___2	YMSPYECLLS(0.01)IS(0.2)S(0.594)S(0.616)S(0.579)K	15	KYMSPYECLLSISSSSKVKKCNIIDLHEKNN
PF3D7_0501400	FIRA	interspersed repeat antigen	0.471337	0.718113	1.18945	0.821171	0.615055	1.1084	1.2705	PF3D7_0501400	685	S	___2	KAS(0.014)EGDNIS(0.983)LS(0.947)S(0.949)LS(0.106)EET(0.001)QEK	11	HADEKKASEGDNISLSSLSEETQEKSHTKKK
PF3D7_1027100	MPP10	U3 small nucleolar ribonucleoprotein protein MPP10, putative	0.470512	-1.03037	-0.559855	-0.910589	-1.15014	-0.602789	-0.51692	PF3D7_1027100	409	S	___2	LS(0.999)DNEKDS(0.87)LS(0.131)NEFNDNKK	2	IEQDIYEINQFDSRLSDNEKDSLSNEFNDNK
PF3D7_1027100	MPP10	U3 small nucleolar ribonucleoprotein protein MPP10, putative	0.470512	-1.03037	-0.559855	-0.910589	-1.15014	-0.602789	-0.51692	PF3D7_1027100	415	S	___2	LS(0.999)DNEKDS(0.87)LS(0.131)NEFNDNKK	8	EINQFDSRLSDNEKDSLSNEFNDNKKTDDVQ
PF3D7_1219600	ATPase2	aminophospholipid-transporting P-ATPase	0.470372	0.812938	1.28331	0.799631	0.826244	1.25872	1.3079	PF3D7_1219600	325	S	___1	LS(0.019)S(0.981)VDLSK	3	KKTTEEIEYRKKRLSSVDLSKSSSAIGSNLC
PF3D7_1119300	U2AF1	splicing factor U2AF small subunit, putative	0.470303	2.16678	2.63709	2.1752	2.15837	2.59719	2.67698	PF3D7_1119300	240	S	___2	S(1)DNEDDDDDEER	1	DRRSSHHYSSKRKNRSDNEDDDDDEERSYKH
PF3D7_1119300	U2AF1	splicing factor U2AF small subunit, putative	0.470303	2.16678	2.63709	2.1752	2.15837	2.59719	2.67698	PF3D7_1119300	252	S	___2	NRS(1)DNEDDDDDEERS(1)YK	15	KNRSDNEDDDDDEERSYKHARRENSAERREK
PF3D7_1011800	PREBP	PRE-binding protein	0.470197	1.91452	2.38472	1.91895	1.91009	2.33135	2.43808	PF3D7_1011800	644	S	___1	GS(0.932)KNS(0.068)DIEEAEEKLNEILK	2	NYDAKTFDASATIKGSKNSDIEEAEEKLNEI
PF3D7_1006100	NOT5	CCR4-NOT transcription complex subunit 5, putative	0.469947	-1.67202	-1.20208	-1.72228	-1.62177	-1.23633	-1.16782	PF3D7_1006100	22	S	___1	KDNET(0.104)MS(0.896)LAAENMLENNFFK	7	NSYKKDKKKKDNETMSLAAENMLENNFFKLQ
PF3D7_0401800	PfD80	Plasmodium exported protein (PHISTb), unknown function	0.469778	2.25098	2.72076	2.26977	2.23219	2.62374	2.81778	PF3D7_0401800	147	S	___3	S(0.002)AS(0.016)AAS(0.975)T(0.961)T(0.952)RS(0.092)AS(0.046)AAS(0.836)T(0.106)T(0.015)R	15	RSASAASTTRSASAASTTRSASAASTTRSAS
PF3D7_0704600	UT	E3 ubiquitin-protein ligase	0.469228	0.570713	1.03994	0.756981	0.384445	1.22273	0.857151	PF3D7_0704600	3335	S	___2	NINS(1)DKGEDSEKNVSK	4	QKGKLKKSTIKKNINSDKGEDSEKNVSKLNE
PF3D7_0704600	UT	E3 ubiquitin-protein ligase	0.469228	0.570713	1.03994	0.756981	0.384445	1.22273	0.857151	PF3D7_0704600	3341	S	___2	NINSDKGEDS(1)EKNVSK	10	KSTIKKNINSDKGEDSEKNVSKLNETKEKEV
PF3D7_1033600	CEF1	myb2 transcription factor, putative	0.468518	-0.950727	-0.482209	-1.09422	-0.807236	-0.570259	-0.394159	PF3D7_1033600	732	S	___1	DDSNIDGCDEKS(1)DNIDGCDEK	12	NNTKDDSNIDGCDEKSDNIDGCDEKSDTTNK
PF3D7_1365700		SNARE associated Golgi protein, putative	0.468457	-0.558892	-0.090435	-0.567879	-0.549906	-0.0949993	-0.0858707	PF3D7_1365700	39	S	___1	ETELLNQHYNS(0.998)GINY(0.001)NYDTSVK	11	NPNEKETELLNQHYNSGINYNYDTSVKHGDN
PF3D7_1473200		DnaJ protein, putative	0.468438	-1.26192	-0.793479	-1.34979	-1.17405	-1.02366	-0.563299	PF3D7_1473200	121	S	___1	AEQSENS(0.001)GKS(0.999)ENSGK	10	VEKVEKAEQSENSGKSENSGKSEISGKSEIS
PF3D7_0422400	RPS19	40S ribosomal protein S19	0.467437	-1.37455	-0.90711	-1.34155	-1.40755	-1.08894	-0.725281	PF3D7_0422400	6	T	___1	AEQFT(1)EDIGVVNK	5	__________MAEQFTEDIGVVNKRLLEPVP
PF3D7_1209400	CIA1	cytosolic iron-sulfur protein assembly protein 1, putative	0.466937	2.64148	3.10842	2.77196	2.51101	3.04052	3.17632	PF3D7_1209400	237	S	___1	NGDS(1)VKNDDIYK	4	NGDSVKNGDSVKNGDSVKNDDIYKNDDRVKN
PF3D7_1004400		RNA-binding protein, putative	0.466857	-4.43957	-3.97271	-4.48507	-4.39408	-4.15506	-3.79037	PF3D7_1004400	282	S	___1	HEGYLS(1)RDHAHK	6	HEGYRHEGYRHEGYLSRDHAHKEFHHNENPY
PF3D7_0221200		Plasmodium exported protein (hyp15), unknown function	0.466847	-2.55093	-2.08408	-2.53763	-2.56423	-2.00457	-2.1636	PF3D7_0221200	65	S	___1	HTLT(0.004)NS(0.307)S(0.689)LR	7	EYGKEEFMKHTLTNSSLRNETILNDKLRKRN
PF3D7_1107300	PAIP1	polyadenylate-binding protein-interacting protein 1, putative	0.466778	3.47228	3.93906	3.59425	3.35031	3.90213	3.97598	PF3D7_1107300	2027	S	___1	KETDKADDIS(1)VCDTISVIEK	10	SVQNKKKETDKADDISVCDTISVIEKKEDFE
PF3D7_0202000	KAHRP	erythrocyte membrane protein 1, PfEMP1;knob-associated histidine-rich protein	0.466753	0.106897	0.57365	0.03512	0.178675	0.66078	0.486521	PF3D7_0202000;PF3D7_1255200	549;1773	T	___2	GAT(1)KEAS(0.055)T(0.891)S(0.055)K	8	CAAEGATKGATKEASTSKEATKEASTSKEAT
PF3D7_1224300	PABP1	polyadenylate-binding protein, putative	0.466227	-1.18675	-0.72052	-1.08126	-1.29223	-0.653219	-0.787821	PF3D7_1224300	51	S	___1	VCRDS(0.999)VT(0.001)R	5	FNTVGHVSSIRVCRDSVTRKSLGYAYVNYHN
PF3D7_1426000	RPL21	60S ribosomal protein L21	0.466223	-4.60398	-4.13775	-4.57888	-4.62908	-4.26778	-4.00773	PF3D7_1426000	161	Y	___1	IITIEPLPFY(0.001)EEY(0.999)	13	PSKIITIEPLPFYEEY_______________
PF3D7_0704600	UT	E3 ubiquitin-protein ligase	0.466184	-0.627283	-0.161099	-0.67506	-0.579506	-0.0670795	-0.255119	PF3D7_0704600	3259	S	___1	LQTLDKES(1)DKAK	8	DENQEDIKLQTLDKESDKAKENLEEEQIQCE
PF3D7_1149000	Pf332	antigen 332, DBL-like protein	0.466063	0.202753	0.668816	0.242561	0.162945	0.639421	0.69821	PF3D7_1149000	2337	T	___1	S(0.004)AT(0.996)EDLVEEEASVTEK	3	ERSVTEKPVEVERSATEDLVEEEASVTEKVS
PF3D7_1004300		E3 ubiquitin-protein ligase, putative	0.465722	-3.99907	-3.53335	-3.93171	-4.06643	-3.48156	-3.58514	PF3D7_1004300	981	S	___1	S(1)RDS(0.996)DNEKEGS(0.004)R	1	TTYSNASNSNNSTRRSRDSDNEKEGSRKKSK
PF3D7_1436100		conserved Plasmodium membrane protein, unknown function	0.465592	-2.10633	-1.64074	-2.0892	-2.12346	-1.67147	-1.61001	PF3D7_1436100	373	S	___1	MIGS(1)FLHEK	4	SLMHYKKKDTKKMIGSFLHEKIYLDDENDLS
PF3D7_0517300	SR1	serine/arginine-rich splicing factor 1	0.465448	0.493837	0.959286	0.51355	0.474125	0.998501	0.920071	PF3D7_0517300	265	S	___1	SLS(1)YQER	3	RRDTYDKKRSYSRSLSYQERRRNNRTISKSR
PF3D7_1445900	DDX5	ATP-dependent RNA helicase DDX5, putative	0.465137	-2.49601	-2.03088	-2.50765	-2.48438	-2.10561	-1.95614	PF3D7_1445900	456	S	___1	AGS(0.989)HGAS(0.01)FT(0.001)FLTADKYR	3	IEDYVHRIGRTGRAGSHGASFTFLTADKYRL
PF3D7_1207100		small subunit rRNA processing factor, putative	0.464997	0.779509	1.24451	0.814692	0.744326	1.16532	1.32369	PF3D7_1207100	488	S	___1	IIDDNCS(1)LDDYKIK	7	FCINYLDLRIIDDNCSLDDYKIKESCDHIPE
PF3D7_1022400	SRSF4	serine/arginine-rich splicing factor 4	0.464678	-0.391877	0.0728006	-0.408039	-0.375715	0.0422611	0.10334	PF3D7_1022400	210	S	___2	RY(0.002)S(0.998)NES(1)GLS(1)DR	6	DYSPKYKKRRRYSNESGLSDRDRSRSRRYSK
PF3D7_1478600	PTP3	EMP1-trafficking protein	0.464208	0.771908	1.23612	0.753981	0.789835	1.14619	1.32604	PF3D7_1478600	453	S	___1	KDNLQDS(1)NKGLNVTTNK	7	FIENDVSDKKDNLQDSNKGLNVTTNKTNDKT
PF3D7_1307800		fork head domain protein, putative	0.464143	0.956478	1.42062	1.07648	0.836475	1.43183	1.40941	PF3D7_1307800	249	S	___2	SSEHT(0.006)RT(0.16)S(0.834)KDNSYYDSK	8	DKIYILKKSSEHTRTSKDNSYYDSKRKYRNI
PF3D7_1307800		fork head domain protein, putative	0.464143	0.956478	1.42062	1.07648	0.836475	1.43183	1.40941	PF3D7_1307800	253	S	___2	T(0.447)S(0.553)KDNS(0.996)Y(0.003)YDSK	6	ILKKSSEHTRTSKDNSYYDSKRKYRNITSED
PF3D7_0815800	VPS9	vacuolar protein sorting-associated protein 9, putative	0.464002	-1.20312	-0.73912	-1.14247	-1.26377	-0.62417	-0.854071	PF3D7_0815800	408	S	___1	NYS(0.42)DS(0.58)CNHMINHISSENIIK	5	NINNDMKETMKNYSDSCNHMINHISSENIIK
PF3D7_1139300	ApiAP2	AP2 domain transcription factor, putative	0.463643	0.664158	1.1278	0.80455	0.523766	1.11983	1.13577	PF3D7_1139300	1794	S	___2	S(0.005)FDKCS(0.989)NENS(0.557)VCINKS(0.45)NEK	10	NSKILRSFDKCSNENSVCINKSNEKLENILD
PF3D7_1359400	CELF1	CUGBP Elav-like family member 1	0.463587	-2.81257	-2.34898	-3.15224	-2.4729	-2.36796	-2.33001	PF3D7_1359400	137	S	___1	MAS(0.405)IS(0.595)EADNAIR	5	TNVHKSSAFVKMASISEADNAIRLLNNQKTL
PF3D7_1138800		WD repeat-containing protein, putative	0.462973	-1.96506	-1.50209	-1.95956	-1.97057	-1.36914	-1.63504	PF3D7_1138800	1787	S	___1	ENMGININS(1)FDELK	9	FVEVEQKENMGININSFDELKYADNIRKSID
PF3D7_0619400		cell division cycle protein 48 homologue, putative	0.462548	-1.9763	-1.51375	-1.89321	-2.05939	-1.42073	-1.60678	PF3D7_0619400	40	S	___1	LIVEEAT(0.016)NDDNS(0.984)VVALNTK	12	NLSRLIVEEATNDDNSVVALNTKRMEELNFF
PF3D7_0501400	FIRA	interspersed repeat antigen	0.461828	0.834602	1.29643	0.88694	0.782265	1.22167	1.37119	PF3D7_0501400	677	S	___3	AS(1)EGDNISLSSLSEETQEK	2	QESIATQEHADEKKASEGDNISLSSLSEETQ
PF3D7_1311900	vapA	V-type proton ATPase catalytic subunit A	0.461627	-2.76265	-2.30102	-2.98265	-2.54264	-2.26472	-2.33732	PF3D7_1311900	283	S	___1	GNEMAEILS(0.993)DFPELT(0.003)T(0.004)K	9	YVGCGERGNEMAEILSDFPELTTKVDNEDVG
PF3D7_1462400		conserved Plasmodium protein, unknown function	0.461603	-2.84539	-2.38379	-2.78564	-2.90514	-2.32907	-2.43851	PF3D7_1462400	852	S	___3	NDLY(1)EKQT(1)FS(1)IS(1)NINEK	10	LLNSKRNDLYEKQTFSISNINEKTKININKE
PF3D7_1462400		conserved Plasmodium protein, unknown function	0.461603	-2.84539	-2.38379	-2.78564	-2.90514	-2.32907	-2.43851	PF3D7_1462400	854	S	___3	NDLY(1)EKQT(1)FS(1)IS(1)NINEK	12	NSKRNDLYEKQTFSISNINEKTKININKEKN
PF3D7_1462400		conserved Plasmodium protein, unknown function	0.461603	-2.84539	-2.38379	-2.78564	-2.90514	-2.32907	-2.43851	PF3D7_1462400	850	T	___3	NDLY(1)EKQT(1)FS(1)IS(1)NINEK	8	DYLLNSKRNDLYEKQTFSISNINEKTKININ
PF3D7_1462400		conserved Plasmodium protein, unknown function	0.461603	-2.84539	-2.38379	-2.78564	-2.90514	-2.32907	-2.43851	PF3D7_1462400	846	Y	___3	NDLY(1)EKQT(1)FS(1)IS(1)NINEK	4	QKKEDYLLNSKRNDLYEKQTFSISNINEKTK
PF3D7_1326300		RNA-binding protein, putative	0.461298	-1.21226	-0.750964	-1.26222	-1.16231	-0.685379	-0.816549	PF3D7_1326300	171	S	___1	NLTS(0.011)S(0.989)HER	5	RKKRRHSNLNRNLTSSHERSRSRERRRRRIQ
PF3D7_1459000	DBP5	ATP-dependent RNA helicase DBP5	0.461218	1.02781	1.48903	1.06516	0.990456	1.50158	1.47647	PF3D7_1459000	189	S	___1	EEKNEDNIS(0.871)T(0.114)S(0.015)DTQNVSNNIITK	9	PSELITKEEKNEDNISTSDTQNVSNNIITKS
PF3D7_1401300	EH2	epoxide hydrolase 2	0.460968	1.86173	2.3227	1.82493	1.89853	2.32824	2.31715	PF3D7_1401300	111	T	___1	QRT(1)NNEQDNNYKDDER	3	DGIGANNLKKNIRQRTNNEQDNNYKDDERFI
PF3D7_1111200		conserved Plasmodium protein, unknown function	0.459948	-0.132257	0.32769	-0.0801601	-0.184355	0.333561	0.321819	PF3D7_1111200	53	S	___1	QQS(0.987)DNS(0.013)KEHLDFNKYDNLSK	3	DQEGVDHNNLLCKQQSDNSKEHLDFNKYDNL
PF3D7_0521000		conserved Plasmodium protein, unknown function	0.459322	-0.134871	0.32445	-0.101068	-0.168674	0.14328	0.505621	PF3D7_0521000	370	S	___1	HY(0.113)S(0.443)S(0.443)DVS(1)LNDEDLKYK	7	RKDTNYKRRHYSSDVSLNDEDLKYKDRKYHR
PF3D7_0922100		ubiquitin-like protein, putative	0.459222	-1.02873	-0.569505	-0.865389	-1.19206	-0.54796	-0.591049	PF3D7_0922100	931	S	___1	YPGS(1)INHEFLR	4	FYYQNFTNSYNRYPGSINHEFLRQIRNLYFS
PF3D7_0730300	ApiAP2	AP2 domain transcription factor AP2-L, putative	0.459193	-2.15945	-1.70025	-2.06295	-2.25595	-1.79414	-1.60637	PF3D7_0730300	892	T	___2	CNQDS(0.06)Y(0.214)S(0.746)T(0.746)NEEPLS(0.222)NHS(0.013)INDPGK	8	NKNHIENRCNQDSYSTNEEPLSNHSINDPGK
PF3D7_1004400		RNA-binding protein, putative	0.459191	1.52694	1.98613	1.84225	1.21164	2.25161	1.72066	PF3D7_1004400	7	S	___1	GKY(0.013)S(0.987)VS(0.999)R	6	_________MGKYSVSRKGEYSAERRYHYRD
PF3D7_1036900		conserved Plasmodium protein, unknown function	0.458733	-1.18497	-0.726234	-1.12116	-1.24878	-0.692669	-0.7598	PF3D7_1036900	246	S	___1	HQGEHNVNDNVT(0.02)S(0.98)QK	13	VEKHQGEHNVNDNVTSQKSKKKKGTSTHNDI
PF3D7_1429600	GEXP03	conserved Plasmodium protein, unknown function	0.458653	1.62919	2.08785	1.65926	1.59912	2.05634	2.11935	PF3D7_1429600	193	S	___1	S(1)AAS(1)EECVHFK	4	NDMSTNNDGTPRSAASEECVHFKEKSYLLDK
PF3D7_1308200	cpsSII	carbamoyl phosphate synthetase	0.458462	-3.80778	-3.34932	-3.72333	-3.89223	-3.33266	-3.36598	PF3D7_1308200	1345	S	___2	VT(0.001)INNS(0.609)NNS(0.695)IS(0.695)NNENVETNLNCVSER	11	NKNIKVTINNSNNSISNNENVETNLNCVSER
PF3D7_1447000		40S ribosomal protein S5	0.458288	-3.78776	-3.32947	-3.63247	-3.94306	-3.20658	-3.45237	PF3D7_1447000	147	S	___1	LS(1)LIPVR	2	EVATAIRGAIISAKLSLIPVRRGYWGNKIGD
PF3D7_1002400.2-p1		RNA-binding protein, putative	0.457948	0.668403	1.12635	0.63006	0.706745	1.02882	1.22388	PF3D7_1002400.2-p1;PF3D7_1002400	224;226	S	___1	S(0.001)T(0.012)S(0.983)VS(0.004)NSER	3	DSKRKKRYDRVRKSTSVSNSERRRYRNSPDR
PF3D7_1343700	Kelch13	kelch protein K13	0.457852	-1.54628	-1.08842	-1.58781	-1.50475	-1.19293	-0.983919	PF3D7_1343700	66	S	___1	T(0.001)ENNS(0.377)FLLNNS(0.526)S(0.089)Y(0.008)GNVK	11	DKNEKTENNSFLLNNSSYGNVKDSLLESIDM
PF3D7_0530900	FRM1	formin 1	0.457813	-2.90874	-2.45092	-2.85558	-2.96189	-2.45994	-2.44191	PF3D7_0530900	1604	S	___3	NNS(1)NNIY(1)S(1)IKALNK	3	ELDSNLLNNKYKKNNSNNIYSIKALNKKTDH
PF3D7_0530900	FRM1	formin 1	0.457813	-2.90874	-2.45092	-2.85558	-2.96189	-2.45994	-2.44191	PF3D7_0530900	1609	S	___3	NNS(1)NNIY(1)S(1)IKALNK	8	LLNNKYKKNNSNNIYSIKALNKKTDHQSNIE
PF3D7_0530900	FRM1	formin 1	0.457813	-2.90874	-2.45092	-2.85558	-2.96189	-2.45994	-2.44191	PF3D7_0530900	1608	Y	___3	NNS(1)NNIY(1)S(1)IKALNK	7	NLLNNKYKKNNSNNIYSIKALNKKTDHQSNI
PF3D7_1013900		translation initiation factor eIF-2B subunit delta, putative	0.457672	-0.356452	0.10122	-0.476189	-0.236715	0.216511	-0.0140705	PF3D7_1013900	177	S	___2	TLNSCLLNECPHFS(1)DS(0.528)S(0.471)NLEYRDEER	14	AKTLNSCLLNECPHFSDSSNLEYRDEERKKN
PF3D7_0704600	UT	E3 ubiquitin-protein ligase	0.457603	-0.565698	-0.108094	-0.55274	-0.578655	-0.164919	-0.0512695	PF3D7_0704600	3241	S	___1	INNKEDDEKS(1)ALDENQEDIK	10	KKGSLKINNKEDDEKSALDENQEDIKLQTLD
PF3D7_1231600	PRP2	pre-mRNA-splicing factor ATP-dependent RNA helicase PRP2, putative	0.456948	1.54149	1.99844	1.67021	1.41278	2.01504	1.98184	PF3D7_1231600	11	S	___1	S(1)IEFTDNDESKK	1	_____MNEKSDLHKRSIEFTDNDESKKKIKT
PF3D7_0112200	MRP1	multidrug resistance-associated protein 1	0.456593	1.91805	2.37464	1.94454	1.89156	2.49279	2.25649	PF3D7_0112200	1523	S	___2	NVS(0.994)LS(0.018)S(0.988)IINSSQDDESKK	3	NISDKISAIVEYKNVSLSSIINSSQDDESKK
PF3D7_0731300	PfG174	Plasmodium exported protein (PHISTb), unknown function	0.456193	3.16017	3.61637	3.23039	3.08995	3.58109	3.65164	PF3D7_0731300	78	S	___1	NVKDGNDS(0.995)S(0.868)S(0.136)EELDNTNVPTSKPK	8	SNYSEVMKNVKDGNDSSSEELDNTNVPTSKP
PF3D7_0801800		mannose-6-phosphate isomerase, putative	0.455937	-1.69135	-1.23541	-1.59385	-1.78885	-1.19312	-1.27771	PF3D7_0801800	716	T	___1	ECATGCS(0.074)NEY(0.391)T(0.527)NVY(0.008)DNLNK	11	KVCEKECATGCSNEYTNVYDNLNKQNDPYFI
PF3D7_0309500	AS	asparagine synthetase [glutamine-hydrolyzing], putative	0.455487	-0.535412	-0.0799246	-0.871519	-0.199305	0.376041	-0.535891	PF3D7_0309500	607	S	___1	CIPLQNQES(1)INY	9	KQFDDVKCIPLQNQESINY____________
PF3D7_1107800	ApiAP2	AP2 domain transcription factor, putative	0.455438	1.32133	1.77677	1.4198	1.22286	1.71603	1.83751	PF3D7_1107800	268	S	___1	LNENNNLYLNCLS(0.987)DS(0.013)YDENNVIKK	13	NEKLNENNNLYLNCLSDSYDENNVIKKKDAT
PF3D7_1467900		rab GTPase activator, putative	0.455367	3.38702	3.84239	3.44383	3.33022	3.83604	3.84874	PF3D7_1467900	1058	S	___1	NQMKNEES(1)DNEQKEK	8	ENNNDDYRNQMKNEESDNEQKEKNMDNENND
PF3D7_1212700	EIF3A	eukaryotic translation initiation factor 3 subunit A, putative	0.455217	1.17551	1.63073	1.0815	1.26953	1.64573	1.61573	PF3D7_1212700	1285	S	___1	HET(0.018)S(0.982)EENTK	4	WNLKEDDDSKAKHETSEENTKSWRNNNKVID
PF3D7_0415300	CRK3	cdc2-related protein kinase 3	0.454933	-2.73163	-2.2767	-2.70502	-2.75825	-2.27185	-2.28155	PF3D7_0415300	1089	S	___1	S(0.998)AT(0.002)ISR	1	HKLNSNKSDIDKTRKSATISRDGSLRRNERK
PF3D7_0501400	FIRA	interspersed repeat antigen	0.454358	0.891447	1.34581	0.95504	0.827854	1.22447	1.46714	PF3D7_0501400	683	S	___3	ASEGDNIS(1)LS(0.629)S(0.365)LS(0.006)EETQEK	8	QEHADEKKASEGDNISLSSLSEETQEKSHTK
PF3D7_0818900	HSP70	heat shock protein 70	0.453837	-0.663392	-0.209555	-0.679449	-0.647335	-0.201149	-0.21796	PF3D7_0818900	92	S	___1	KFT(0.09)ES(0.821)S(0.09)VQSDMK	5	TVFDAKRLIGRKFTESSVQSDMKHWPFTVKS
PF3D7_0918900	gammaGCS	gamma-glutamylcysteine synthetase	0.453743	-1.64917	-1.19542	-1.57441	-1.72392	-1.3905	-1.00035	PF3D7_0918900	1037	T	___1	YISGEDYTQYLLLNEVLKDDQDYCT(0.5)CT(0.5)RR	25	YLLLNEVLKDDQDYCTCTRRTIYEESMDNTV
PF3D7_0918900	gammaGCS	gamma-glutamylcysteine synthetase	0.453743	-1.64917	-1.19542	-1.57441	-1.72392	-1.3905	-1.00035	PF3D7_0918900	1039	T	___1	YISGEDYTQYLLLNEVLKDDQDYCT(0.5)CT(0.5)RR	27	LLNEVLKDDQDYCTCTRRTIYEESMDNTVEF
PF3D7_1438400	MCA2	metacaspase-like protein	0.453341	2.42722	2.88056	2.54806	2.30639	2.88719	2.87394	PF3D7_1438400	559	S	___1	S(0.004)FS(0.975)S(0.021)FDVK	3	TNYMNKDSTKNVRSFSSFDVKERISPRVIRN
PF3D7_1438400	MCA2	metacaspase-like protein	0.452996	0.203758	0.656754	0.210871	0.196646	0.64304	0.670469	PF3D7_1438400	58	S	___1	ILVKES(1)ENDRNES(1)IQK	13	KGRILVKESENDRNESIQKKQMLSSMDNRKT
PF3D7_1473700	NUP116	nucleoporin NUP116/NSP116, putative	0.452918	-1.80397	-1.35105	-1.6203	-1.98763	-1.42471	-1.27739	PF3D7_1473700	741	T	___1	IIHT(0.576)S(0.424)DAIKEIVQPHQR	4	NQIQKLPFKRSRIIHTSDAIKEIVQPHQRKK
PF3D7_1001500	ETRAMP10	early transcribed membrane protein 10.1	0.452887	0.626389	1.07928	0.643951	0.608826	1.09905	1.0595	PF3D7_1001500	100	T	___1	NKS(0.948)QEGS(0.185)T(0.84)PLLT(0.027)AKA	8	KKGSNDSKNKSQEGSTPLLTAKA________
PF3D7_1136600		conserved Plasmodium protein, unknown function	0.452682	-2.82513	-2.37245	-2.6989	-2.95135	-2.32345	-2.42144	PF3D7_1136600	1109	S	___2	ENIDENIT(0.489)T(0.537)DY(0.018)ES(0.809)S(0.147)KNIR	13	KEKENIDENITTDYESSKNIREGKKIKINEI
PF3D7_1413000		conserved Plasmodium protein, unknown function	0.452637	-1.6338	-1.18116	-2.23899	-1.0286	-0.969259	-1.39306	PF3D7_1413000	125	S	___3	S(0.846)T(0.852)NY(0.234)NKFNS(0.079)LVVS(0.392)KS(0.315)FS(0.283)MK	1	TQRSNISLNRITKCKSTNYNKFNSLVVSKSF
PF3D7_1138500	PPM2	protein phosphatase PPM2	0.452302	-2.6381	-2.1858	-2.61513	-2.66107	-2.01105	-2.36055	PF3D7_1138500	257	S	___1	SDENYDS(0.983)S(0.017)NLNLGDNQDRK	7	GTNGENILRSDENYDSSNLNLGDNQDRKNYD
PF3D7_0506800	TCF25	transcription factor 25, putative	0.452072	2.03763	2.48971	2.10894	1.96633	2.48701	2.4924	PF3D7_0506800	133	S	___1	NVDDEIS(1)DILNEINKEEKK	7	KKKKKKKKKNVDDEISDILNEINKEEKKNNK
PF3D7_1212900	BDP2	bromodomain protein 2, putative	0.451718	-1.45678	-1.00506	-1.49831	-1.41525	-1.03379	-0.976339	PF3D7_1212900	435	S	___1	NVHGGSTNLGTNNS(0.993)T(0.977)PT(0.028)HNNS(0.001)NTGK	14	NKNVHGGSTNLGTNNSTPTHNNSNTGKGKGS
PF3D7_0501400	FIRA	interspersed repeat antigen	0.451492	1.16128	1.61277	1.22585	1.09671	1.53236	1.69319	PF3D7_0501400	686	S	___3	KAS(0.014)EGDNIS(0.983)LS(0.947)S(0.949)LS(0.106)EET(0.001)QEK	12	ADEKKASEGDNISLSSLSEETQEKSHTKKKK
PF3D7_0804300		zinc finger protein, putative	0.451422	1.88811	2.33953	2.04445	1.73177	2.14076	2.5383	PF3D7_0804300	411	S	___1	NIDNVNYDS(0.977)S(0.023)YEEDMKIK	9	FKKCSSRNIDNVNYDSSYEEDMKIKNLHHKE
PF3D7_1417200		NOT family protein, putative	0.451273	-2.67688	-2.22561	-2.65631	-2.69746	-2.21071	-2.24051	PF3D7_1417200	2936	S	___1	INT(0.045)PNS(0.955)IHGNNIECNENNNMYLK	6	NQKFIHKDSKINTPNSIHGNNIECNENNNMY
PF3D7_0817300		conserved Plasmodium protein, unknown function	0.451167	-3.2773	-2.82613	-3.25854	-3.29605	-2.8747	-2.77756	PF3D7_0817300	29	S	___2	NNSSNSSNENNNNDENVS(1)LHAER	18	SSNSSNENNNNDENVSLHAERNNETNCTKGN
PF3D7_1339300		conserved Plasmodium protein, unknown function	0.450942	-0.262992	0.18795	-0.25042	-0.275564	0.253561	0.122339	PF3D7_1339300	120	T	___1	T(0.421)CS(0.583)DNT(0.994)HNEDGS(0.003)K	6	KSFSYSEESKTCSDNTHNEDGSKKQNFSRTL
PF3D7_1362700		conserved Plasmodium protein, unknown function	0.450653	0.398723	0.849376	0.42894	0.368505	0.66785	1.0309	PF3D7_1362700	913	S	___2	EGS(1)NVNS(0.901)CT(0.099)EENTGANNKEK	3	NDNSMNSSNNHFREGSNVNSCTEENTGANNK
PF3D7_1362700		conserved Plasmodium protein, unknown function	0.450653	0.398723	0.849376	0.42894	0.368505	0.66785	1.0309	PF3D7_1362700	917	S	___2	EGSNVNS(0.996)CT(0.004)EENTGANNK	7	MNSSNNHFREGSNVNSCTEENTGANNKEKIF
PF3D7_1453900		conserved Plasmodium protein, unknown function	0.450647	1.42997	1.88062	1.39663	1.4633	1.85965	1.90158	PF3D7_1453900	136	S	___1	CYDVCTMSLDES(1)EHEIVMDNDNER	12	ENKKCYDVCTMSLDESEHEIVMDNDNERKGV
PF3D7_0322400		regulator of initiation factor 2 (eIF2)	0.450017	-2.51113	-2.06111	-2.53969	-2.48256	-2.08119	-2.04103	PF3D7_0322400	445	T	___1	INNQCEDNS(0.5)EGDT(0.5)HMEGK	13	TNRINNQCEDNSEGDTHMEGKKIKNKNNNNN
PF3D7_0703200		conserved Plasmodium protein, unknown function	0.449943	-3.81227	-3.36232	-3.6246	-3.99994	-3.1466	-3.57805	PF3D7_0703200	1456	S	___1	QNFLT(0.049)Y(0.45)QS(0.501)DDDDKCS(0.001)KPK	8	NLSYDLTKQNFLTYQSDDDDKCSKPKYVKDR
PF3D7_0801000		Plasmodium exported protein (PHISTc), unknown function	0.449562	0.332483	0.782045	0.355631	0.309336	0.757221	0.80687	PF3D7_0801000	307	S	___1	DNYAS(1)EQEYFDRGEQLNDVSADNNTSNK	5	PTQHDVPVQLRDNYASEQEYFDRGEQLNDVS
PF3D7_1410300		WD repeat-containing protein, putative	0.449537	0.0295782	0.479115	-0.0313091	0.0904655	0.407721	0.55051	PF3D7_1410300	2482	S	___1	KKNEES(1)EQNIEEYFCSK	6	NKEDDIRDDKKKNEESEQNIEEYFCSKNNES
PF3D7_0601900		conserved Plasmodium protein, unknown function	0.449512	-2.19274	-1.74323	-2.26005	-2.12543	-1.8081	-1.67836	PF3D7_0601900	123	S	___2	SHSSSSSVY(0.014)AS(0.986)ANAEN	11	RQAARSHSSSSSVYASANAEN__________
PF3D7_0511000	TCTP	translationally-controlled tumor protein homolog	0.448982	-0.521817	-0.072835	-0.76342	-0.280214	-0.192699	0.0470295	PF3D7_0511000	15	S	___1	VFKDVFT(0.001)NDEVCS(0.997)DS(0.003)YVQQDPFEVPEFR	13	_MKVFKDVFTNDEVCSDSYVQQDPFEVPEFR
PF3D7_0301700		Plasmodium exported protein, unknown function	0.448452	1.36043	1.80888	1.36946	1.3514	1.77607	1.8417	PF3D7_0301700	149	T	___2	VTVLEPQT(1)ENS(1)EDEENYEK	8	EYYNSTPRVTVLEPQTENSEDEENYEKTIVD
PF3D7_1433900		protein kinase, putative	0.448388	-0.714272	-0.265884	-0.54085	-0.887695	-0.21707	-0.314699	PF3D7_1433900	777	S	___3	NIIY(0.975)PT(0.971)LFS(0.997)T(0.996)KMVVDY(0.061)LNK	9	CIFSFKRNIIYPTLFSTKMVVDYLNKNVKEK
PF3D7_1433900		protein kinase, putative	0.448388	-0.714272	-0.265884	-0.54085	-0.887695	-0.21707	-0.314699	PF3D7_1433900	774	T	___3	NIIY(0.975)PT(0.971)LFS(0.997)T(0.996)KMVVDY(0.061)LNK	6	CTHCIFSFKRNIIYPTLFSTKMVVDYLNKNV
PF3D7_1433900		protein kinase, putative	0.448388	-0.714272	-0.265884	-0.54085	-0.887695	-0.21707	-0.314699	PF3D7_1433900	778	T	___3	NIIY(0.975)PT(0.971)LFS(0.997)T(0.996)KMVVDY(0.061)LNK	10	IFSFKRNIIYPTLFSTKMVVDYLNKNVKEKN
PF3D7_1433900		protein kinase, putative	0.448388	-0.714272	-0.265884	-0.54085	-0.887695	-0.21707	-0.314699	PF3D7_1433900	772	Y	___3	NIIY(0.975)PT(0.971)LFS(0.997)T(0.996)KMVVDY(0.061)LNK	4	FKCTHCIFSFKRNIIYPTLFSTKMVVDYLNK
PF3D7_0503300	SRSF12	serine/arginine-rich splicing factor 12	0.448148	-0.669997	-0.221849	-0.570629	-0.769365	-0.125639	-0.31806	PF3D7_0503300	76	S	___1	EMNGS(1)EIDGSR	5	YDAKDAEQALKEMNGSEIDGSRIEVFVAQKG
PF3D7_0801800		mannose-6-phosphate isomerase, putative	0.447942	-0.884402	-0.43646	-0.81686	-0.951944	-0.39134	-0.481581	PF3D7_0801800	225	S	___2	RYS(1)DIEFASLNNDSTK	3	TKGSTLGGENDLKRYSDIEFASLNNDSTKEK
PF3D7_0801800		mannose-6-phosphate isomerase, putative	0.447942	-0.884402	-0.43646	-0.81686	-0.951944	-0.39134	-0.481581	PF3D7_0801800	231	S	___2	RY(0.016)S(0.984)DIEFAS(0.999)LNNDS(0.001)T(0.001)KEK	9	GGENDLKRYSDIEFASLNNDSTKEKEDMNEQ
PF3D7_1142100		conserved Plasmodium protein, unknown function	0.447658	-0.970278	-0.52262	-0.81958	-1.12098	-0.43799	-0.60725	PF3D7_1142100	2170	S	___1	FIPS(0.087)DS(0.913)QTK	6	DYTNDNINNRFIPSDSQTKEDYNYDKYRKNE
PF3D7_1459000	DBP5	ATP-dependent RNA helicase DBP5	0.447423	0.635283	1.08271	0.776411	0.494154	1.11926	1.04615	PF3D7_1459000	190	T	___1	EEKNEDNIS(0.075)T(0.819)S(0.106)DTQNVSNNIITK	10	SELITKEEKNEDNISTSDTQNVSNNIITKSE
PF3D7_1362700		conserved Plasmodium protein, unknown function	0.447383	2.27701	2.7244	2.21189	2.34213	2.62757	2.82122	PF3D7_1362700	798	S	___1	NEKDT(0.001)HS(0.999)DNNMK	7	SNHINDTTKNEKDTHSDNNMKSVPNNKNKNK
PF3D7_0821100	PK1	protein kinase 1	0.447268	-0.825858	-0.37859	-0.73122	-0.920496	-0.425508	-0.331671	PF3D7_0821100	712	Y	___1	YFSY(1)VCSR	4	FNTSIKLKENYKYFSYVCSRYYRAPELLFGS
PF3D7_0824400	NT2	nucleoside transporter 2	0.447237	3.9479	4.39513	3.99158	3.90421	4.38966	4.40061	PF3D7_0824400	27	S	___1	IINEDDES(1)LLNMKK	8	MDGITENKIINEDDESLLNMKKEEIILNGKF
PF3D7_1004400		RNA-binding protein, putative	0.446637	1.24239	1.68903	1.27423	1.21055	1.69405	1.68401	PF3D7_1004400	650	S	___2	S(0.403)S(0.596)EEVGEHT(0.001)NS(1)IINEDINKDQTDIIDEK	2	EEKMINGNKKRILKSSEEVGEHTNSIINEDI
PF3D7_0501400	FIRA	interspersed repeat antigen	0.446259	-0.115088	0.331171	0.0181503	-0.248325	0.292791	0.369551	PF3D7_0501400	1231	S	___1	NEKKPS(1)LEGVK	6	RGDKNDKKSKNEKKPSLEGVKQNAEEQKEQP
PF3D7_0730900	PTP4	EMP1-trafficking protein	0.446129	0.848447	1.29458	0.84952	0.847374	1.2258	1.36335	PF3D7_0730900	1486	S	___1	S(0.002)FS(0.143)S(0.855)QGIREDFPYK	4	MKGQKYGSKNVRSFSSQGIREDFPYKNENNH
PF3D7_1305000		conserved Plasmodium protein, unknown function	0.445652	1.25611	1.70176	1.34262	1.1696	1.70121	1.70231	PF3D7_1305000	564	S	___1	IFSDDDES(1)EESFLSSYK	8	NVKRRKKKIFSDDDESEESFLSSYKNVEKDI
PF3D7_1227700	KIC2	conserved Plasmodium protein, unknown function	0.445437	-0.0275469	0.417891	0.00921059	-0.0643044	0.393711	0.44207	PF3D7_1227700	685	T	___2	NIT(0.013)IGS(0.987)LADT(1)EKR	10	KKSYDKNITIGSLADTEKRSIKIKNIIPHSH
PF3D7_0812700	SNRPC	U1 small nuclear ribonucleoprotein C, putative	0.444742	0.682293	1.12704	0.74155	0.623035	1.11557	1.1385	PF3D7_0812700	235	S	___1	EHIESDIS(1)	8	FLNPENSKEHIESDIS_______________
PF3D7_1328500		alpha/beta-hydrolase, putative	0.444504	1.70043	2.14493	1.69664	1.70421	2.11418	2.17568	PF3D7_1328500	259	S	___1	YT(0.002)S(0.045)T(0.284)S(0.836)S(0.833)LNKVNGNNNIECENLR	5	IEVKSEVNIPKYTSTSSLNKVNGNNNIECEN
PF3D7_1234800	SF3B3	splicing factor 3B subunit 3, putative	0.443222	-0.175158	0.268064	0.0294609	-0.379776	0.33717	0.198959	PF3D7_1234800	210	S	___1	QINEELENENDDEDKS(1)DEER	16	QINEELENENDDEDKSDEERKDNNDIINDKN
PF3D7_0301600	GEXP21	Plasmodium exported protein (hyp1), unknown function	0.442623	-3.23496	-2.79233	-3.28147	-3.18845	-2.84301	-2.74166	PF3D7_0301600	599	T	___1	IS(0.3)T(0.687)S(0.013)SHSTR	3	PSEYKNSPFKESKISTSSHSTRSYENEFNLS
PF3D7_0815800	VPS9	vacuolar protein sorting-associated protein 9, putative	0.442493	2.71589	3.15839	2.75514	2.67665	3.15696	3.15981	PF3D7_0815800	258	S	___1	S(1)Y(1)HAGS(1)PINK	6	NNNINTHVDKSYHAGSPINKKKIPPMQNINN
PF3D7_0731300	PfG174	Plasmodium exported protein (PHISTb), unknown function	0.442263	1.80912	2.25138	1.86266	1.75558	2.20678	2.29598	PF3D7_0731300	80	S	___2	NVKDGNDS(0.014)S(0.11)S(0.876)EELDNTNVPTSKPK	10	YSEVMKNVKDGNDSSSEELDNTNVPTSKPKK
PF3D7_1004400		RNA-binding protein, putative	0.442258	1.13356	1.57582	1.16318	1.10394	1.58949	1.56215	PF3D7_1004400	659	S	___2	S(0.452)S(0.548)EEVGEHTNS(1)IINEDINKDQTDIIDEK	11	KRILKSSEEVGEHTNSIINEDINKDQTDIID
PF3D7_0112200	MRP1	multidrug resistance-associated protein 1	0.441917	2.12161	2.56353	2.15982	2.0834	2.66921	2.45784	PF3D7_0112200	1526	S	___2	NVS(0.994)LS(0.018)S(0.988)IINSSQDDESKK	6	DKISAIVEYKNVSLSSIINSSQDDESKKKYG
PF3D7_1466400	ApiAP2	AP2 domain transcription factor AP2-SP	0.441837	1.12805	1.56989	1.16608	1.09002	1.58976	1.55002	PF3D7_1466400	553	T	___1	T(0.943)T(0.057)SNINNR	1	DHSLKGQMELSKRKKTTSNINNRKNDLLEDS
PF3D7_1438400	MCA2	metacaspase-like protein	0.441832	-1.05414	-0.61231	-1.11095	-0.997335	-0.59321	-0.631411	PF3D7_1438400	76	S	___1	T(0.046)NKS(0.954)EKHNISSYYK	4	KKQMLSSMDNRKTNKSEKHNISSYYKMRKKA
PF3D7_1351000		phosphatidylinositol transfer protein, putative	0.441653	-2.14939	-1.70774	-2.06052	-2.23827	-1.66931	-1.74617	PF3D7_1351000	913	S	___1	FVES(0.632)AVNNY(0.368)WDNK	4	GLKMKTQDDKNKFVESAVNNYWDNKMDKNFN
PF3D7_0614300	MFR1	major facilitator superfamily-related transporter, putative	0.441322	1.11994	1.56126	1.18606	1.05383	1.81835	1.30418	PF3D7_0614300	558	S	___1	S(0.587)YS(0.413)KDKR	1	KAYGNDELYLNPAQRSYSKDKRDKFLEIEIE
PF3D7_0206000	RAD2	DNA repair protein RAD2, putative	0.440207	-0.373267	0.0669403	-0.302	-0.444534	0.00599098	0.12789	PF3D7_0206000	1057	S	___1	DYIS(1)DVDKNHVNNIYNIER	4	DNDDELEKNLSKDYISDVDKNHVNNIYNIER
PF3D7_1358800	RPS15	40S ribosomal protein S15	0.440022	-0.699437	-0.259415	-0.619349	-0.779526	-0.0669193	-0.45191	PF3D7_1358800	24	S	___1	KQPS(1)WLK	4	KGISSSTLPYKRKQPSWLKQKPSEIEDAIIK
PF3D7_1442700		conserved Plasmodium protein, unknown function	0.439898	-1.10791	-0.668015	-1.05032	-1.1655	-0.607969	-0.72806	PF3D7_1442700	1449	S	___1	S(1)LDIKDDIK	1	PLRKNKLNHSYNSIKSLDIKDDIKLEENNKE
PF3D7_0202000	KAHRP	knob-associated histidine-rich protein	0.439673	2.79284	3.23252	2.84923	2.73645	3.17121	3.29382	PF3D7_0202000	554	T	___2	EAT(1)KEAS(0.322)T(0.356)S(0.322)K	3	ATKGATKEASTSKEATKEASTSKEATKEAST
PF3D7_0729100		conserved Plasmodium protein, unknown function	0.439402	-1.87838	-1.43898	-1.72483	-2.03193	-1.51532	-1.36263	PF3D7_0729100	1129	S	___2	PVFNDRES(0.999)EIS(0.952)VNKHILGNS(0.049)NK	8	SSPLILAKPVFNDRESEISVNKHILGNSNKN
PF3D7_0729100		conserved Plasmodium protein, unknown function	0.439402	-1.87838	-1.43898	-1.72483	-2.03193	-1.51532	-1.36263	PF3D7_0729100	1132	S	___2	ES(0.041)EIS(0.959)VNKHILGNSNK	5	LILAKPVFNDRESEISVNKHILGNSNKNLFR
PF3D7_1013500	PI-PLC	phosphoinositide-specific phospholipase C	0.439252	-1.26395	-0.8247	-1.31558	-1.21233	-0.83642	-0.812981	PF3D7_1013500	921	S	___1	NDNNMDNDS(1)S(1)DNNNNNNVK	9	ILNIIKKNDNNMDNDSSDNNNNNNVKIPKNS
PF3D7_0708400	HSP90	heat shock protein 90	0.439223	0.500293	0.939516	0.471731	0.528854	0.787271	1.09176	PF3D7_0708400	49	S	___1	YES(0.998)IT(0.002)DTQK	3	LISNASDALDKIRYESITDTQKLSAEPEFFI
PF3D7_1138700	KIC5	conserved Plasmodium protein, unknown function	0.438993	-1.06268	-0.623685	-0.94569	-1.17966	-0.7157	-0.53167	PF3D7_1138700	227	S	___1	DFDNNIQDT(0.002)NLFS(0.168)S(0.83)EFDEELNEYRHEK	14	NKDFDNNIQDTNLFSSEFDEELNEYRHEKFN
PF3D7_1134600		zinc finger protein, putative	0.438828	-2.03198	-1.59315	-1.96638	-2.09757	-1.78708	-1.39922	PF3D7_1134600	4	S	___1	S(0.143)QS(0.857)KPNQEISSR	3	____________MSQSKPNQEISSRNLHEKH
PF3D7_1329500		conserved Plasmodium protein, unknown function	0.438732	-0.597367	-0.158635	-0.540009	-0.654726	-0.19738	-0.11989	PF3D7_1329500	1715	S	___1	NS(0.999)Y(0.001)NNMDK	2	LANFAKMEDDFMPRNSYNNMDKKSKNNGMPP
PF3D7_1009400	ZNF2	zinc finger protein, putative	0.438627	-2.19229	-1.75366	-2.09844	-2.28613	-1.86347	-1.64385	PF3D7_1009400	313	S	___1	WDVPEPS(0.994)EGDPS(0.006)ILK	7	IQQKRPSTKWDVPEPSEGDPSILKHNKEDST
PF3D7_1426100	BTF3	basic transcription factor 3b, putative	0.438553	-1.73599	-1.29744	-1.70583	-1.76616	-1.32273	-1.27215	PF3D7_1426100	43	S	___1	VHKNS(0.978)IS(0.022)NEK	5	GKGSARRKIKKVHKNSISNEKKINIILKKIG
PF3D7_0827300		conserved Plasmodium protein, unknown function	0.438387	-0.276147	0.16224	-0.162498	-0.389795	0.1399	0.18458	PF3D7_0827300	456	S	___2	INQEDKS(1)DISLSTCCMQSEK	7	NSAEMETGRINQEDKSDISLSTCCMQSEKNK
PF3D7_0827300		conserved Plasmodium protein, unknown function	0.438387	-0.276147	0.16224	-0.162498	-0.389795	0.1399	0.18458	PF3D7_0827300	461	S	___2	INQEDKS(0.986)DIS(0.022)LS(0.704)T(0.288)CCMQSEK	12	ETGRINQEDKSDISLSTCCMQSEKNKENEKY
PF3D7_1453900		conserved Plasmodium protein, unknown function	0.438048	3.67091	4.10896	3.72098	3.62085	4.04777	4.17015	PF3D7_1453900	352	S	___1	S(1)HNDVEEGK	1	NKDNANLNDAYEDRRSHNDVEEGKISELLID
PF3D7_0812500		RNA-binding protein, putative	0.437283	0.150973	0.588256	0.316351	-0.0144043	0.571981	0.60453	PF3D7_0812500	20	S	___2	LEEERS(1)NT(1)CEETEQVEETSNNK	6	FSRKKKSEERLEEERSNTCEETEQVEETSNN
PF3D7_0818900	HSP70	heat shock protein 70	0.437222	-2.31945	-1.88223	-2.40654	-2.23236	-1.9324	-1.83206	PF3D7_0818900	442	T	___1	KS(0.358)QIFT(0.513)T(0.129)YADNQPGVLIQVYEGER	6	IERNTTIPAKKSQIFTTYADNQPGVLIQVYE
PF3D7_1223400		phospholipid-transporting ATPase, putative	0.436748	2.42895	2.86569	2.37245	2.48545	2.89135	2.84004	PF3D7_1223400	412	S	___1	TTENNNHSLNDNQLLNYS(1)FDMAKEDEGR	18	ENNNHSLNDNQLLNYSFDMAKEDEGRVQDDE
PF3D7_0617200		conserved Plasmodium protein, unknown function	0.436522	0.0195179	0.45604	0.0562515	-0.0172157	0.32057	0.591511	PF3D7_0617200	25	S	___1	LGS(0.361)IS(0.634)QS(0.004)IDEIKK	5	EKPDFDAYNEKLGSISQSIDEIKKKIDNLQK
PF3D7_1302100	G27/25	gamete antigen 27/25	0.435962	-1.27599	-0.840025	-1.20692	-1.34505	-0.751249	-0.928801	PF3D7_1302100	208	T	___1	PIPALPVT(1)PDEPHHNNI	8	VVDSYIIKPIPALPVTPDEPHHNNI______
PF3D7_0202000	KAHRP	knob-associated histidine-rich protein	0.435808	4.65097	5.08678	4.61948	4.68246	4.99265	5.18091	PF3D7_0202000	559	T	___1	EAS(0.004)T(0.011)S(0.012)KEAT(0.969)KEAS(0.165)T(0.728)S(0.111)K	14	TKEASTSKEATKEASTSKEATKEASTSKEAT
PF3D7_0709700	PARE	prodrug activation and resistance esterase	0.435747	-0.923177	-0.48743	-1.02497	-0.821384	-0.52681	-0.44805	PF3D7_0709700	309	S	___1	KDS(0.999)VCFYGGTLK	3	IPENTPILFAHSKKDSVCFYGGTLKFYNKLK
PF3D7_0406500		NYN domain-containing protein, putative	0.435713	-1.96132	-1.52561	-2.46928	-1.45337	-1.19945	-1.85177	PF3D7_0406500	2946	T	___1	T(0.522)AT(0.476)NENIIY(0.001)DLY(0.001)EQEKPLNIPK	1	KNGDKKDIKREVIIKTATNENIIYDLYEQEK
PF3D7_1146000	RSA4	ribosome assembly protein 4, putative	0.435668	-2.96365	-2.52798	-2.7324	-3.19491	-2.46754	-2.58843	PF3D7_1146000	308	T	___1	NIS(0.017)PNNT(0.758)QNNT(0.173)T(0.04)S(0.009)T(0.002)NCSYFVR	7	NNSKNNSKRNISPNNTQNNTTSTNCSYFVRS
PF3D7_1343400	RAD5	DNA repair protein RAD5, putative	0.435312	-2.16849	-1.73318	-2.24284	-2.09414	-1.8443	-1.62206	PF3D7_1343400	621	S	___1	LEES(0.011)S(0.989)DYENADDDIR	5	IKCKETMDNVKLEESSDYENADDDIRNREPL
PF3D7_1138500	PPM2	protein phosphatase PPM2	0.435087	-1.3027	-0.867615	-1.16608	-1.43933	-0.928829	-0.8064	PF3D7_1138500	797	S	___1	LKS(1)EDQNNINNEQENILNTSNNDFQK	3	HMNTNNNSDQNEKLKSEDQNNINNEQENILN
PF3D7_0904600		ubiquitin specific protease, putative	0.434933	0.308713	0.743646	0.416361	0.201065	0.87606	0.611231	PF3D7_0904600	277	T	___1	KNNNINSTVNYDNTNTEENIT(0.609)S(0.391)DHCNIKDDTR	21	NSTVNYDNTNTEENITSDHCNIKDDTRLEKD
PF3D7_1417600		conserved Plasmodium protein, unknown function	0.434659	1.74333	2.17799	1.82819	1.65847	2.21844	2.13754	PF3D7_1417600	3746	S	___1	KNVS(0.908)S(0.092)NIR	4	MGNIKNDNIEEKKNVSSNIRSIADNSQRLQN
PF3D7_1141300		conserved Plasmodium protein, unknown function	0.434218	-2.31264	-1.87842	-2.2217	-2.40358	-1.70046	-2.05638	PF3D7_1141300	75	Y	___2	VY(0.027)S(0.522)S(0.687)NDEY(0.513)Y(0.203)Y(0.048)DEK	8	LDTEKSEKVYSSNDEYYYDEKNKLNHNDNKD
PF3D7_0521000		conserved Plasmodium protein, unknown function	0.434078	-4.12258	-3.6885	-4.03888	-4.20629	-3.81172	-3.56529	PF3D7_0521000	456	S	___1	ENDS(0.009)VNNEQNNS(0.503)S(0.433)GNT(0.055)K	12	DIKKENDSVNNEQNNSSGNTKQIDNIQKDNN
PF3D7_0517300	SR1	serine/arginine-rich splicing factor 1	0.433517	-1.33455	-0.901034	-1.36065	-1.30845	-0.907419	-0.89465	PF3D7_0517300	263	S	___1	S(0.027)Y(0.003)S(0.971)RS(0.998)LS(0.97)Y(0.032)QER	5	DRRRDTYDKKRSYSRSLSYQERRRNNRTISK
PF3D7_1333600	UTP4	U3 small nucleolar RNA-associated protein 4, putative	0.433397	-1.25761	-0.824215	-1.23254	-1.28268	-0.85832	-0.79011	PF3D7_1333600	1105	S	___1	GTCENDS(0.996)S(0.037)S(0.965)ET(0.002)EEKSNTNK	7	LMNLNKEYKGTCENDSSSETEEKSNTNKANI
PF3D7_1460500		conserved Plasmodium protein, unknown function	0.433243	-0.383847	0.0493956	-0.325359	-0.442335	-0.00392914	0.10272	PF3D7_1460500	555	T	___1	AYTENDNDT(0.102)T(0.876)S(0.018)CS(0.003)KENVAFYEHNNNNLK	10	NDKKNRAYTENDNDTTSCSKENVAFYEHNNN
PF3D7_0501400	FIRA	interspersed repeat antigen	0.433023	1.67121	2.10424	1.70944	1.63298	1.97302	2.23545	PF3D7_0501400	422	S	___2	KGS(1)EGDNIS(1)LS(0.944)S(0.055)LS(0.001)EETQEK	11	HIDEKKGSEGDNISLSSLSEETQEKSHTKKK
PF3D7_1445400	CLK1	protein serine/threonine kinase-1	0.432748	1.97631	2.40906	2.03704	1.91558	2.39272	2.42539	PF3D7_1445400	271	S	___2	DIYQPSS(0.119)S(0.88)LHK	8	WEDNYTYKDIYQPSSSLHKYKRRSNFTRDDN
PF3D7_0106300	ATP6	calcium-transporting ATPase	0.432673	0.876048	1.30872	0.83242	0.919676	1.30164	1.3158	PF3D7_0106300	482	S	___1	S(1)NENTIISR	1	SRSGAKRNIPLKEMKSNENTIISRGSKILED
PF3D7_1330800		RNA-binding protein, putative	0.432123	2.08159	2.51371	2.12238	2.04079	2.494	2.53342	PF3D7_1330800	35	S	___1	ATES(0.991)T(0.009)AVDSEAK	4	DIKADDSNVDNKATESTAVDSEAKMEISSKV
PF3D7_0621200	PDX1	pyridoxine biosynthesis protein PDX1	0.431791	3.01833	3.45012	3.10858	2.92809	3.41695	3.4833	PF3D7_0621200	284	S	___1	VS(1)DKWK	2	VSMNLGKAMCGSTRVSDKWKNKNEEHTKFLT
PF3D7_1445400	CLK1	conserved Plasmodium protein, unknown function;mRNA-binding protein PUF1;protein serine/threonine kinase-1	0.431757	-0.149247	0.28251	-0.307009	0.0085144	0.40736	0.15766	PF3D7_1445400;PF3D7_1412200;PF3D7_0518700	404;354;1888	S	___1	KYS(1)NESK	3	DDVKRELKKRKKKKYSNESKVYDSLKRDETN
PF3D7_0401800	PfD80	Plasmodium exported protein (PHISTb), unknown function	0.431217	2.50165	2.93287	2.51792	2.48537	2.84429	3.02144	PF3D7_0401800	142	S	___3	S(0.022)AS(0.393)AAS(0.393)T(0.084)T(0.109)RS(0.994)AS(0.005)AASTTR	10	AASTTRSASAASTTRSASAASTTRSASAAST
PF3D7_1303500	NHE	sodium/hydrogen exchanger, Na+, H+ antiporter	0.431183	-1.63115	-1.19996	-1.7256	-1.5367	-1.22983	-1.1701	PF3D7_1303500	1304	S	___1	NKDLIMS(1)DNFIVK	7	REMLNLDERNKDLIMSDNFIVKIPVDISNDD
PF3D7_0401800	PfD80	Plasmodium exported protein (PHISTb), unknown function	0.431038	-2.77725	-2.34621	-2.65745	-2.89705	-2.40733	-2.2851	PF3D7_0401800	184	T	___2	SASTASTASAAS(0.002)AAS(0.875)T(0.875)T(0.249)R	16	SASTASTASAASAASTTRSASAASTTRSASA
PF3D7_1124300		conserved Plasmodium protein, unknown function	0.430987	2.18255	2.61353	2.27073	2.09436	2.631	2.59607	PF3D7_1124300	289	S	___1	VRS(1)YDK	3	VDKVLLDDIDIEKVRSYDKIMDAEERDKLEL
PF3D7_1320900		RNA-binding protein, putative	0.430747	2.11943	2.55018	2.09924	2.13963	2.49577	2.60459	PF3D7_1320900	120	S	___1	MKELEEDEENLNDDS(1)LKGDS(1)	15	KMKELEEDEENLNDDSLKGDS__________
PF3D7_1111600		endonuclease/exonuclease/phosphatase family protein, putative	0.430613	0.552708	0.98332	0.697851	0.407564	0.882721	1.08392	PF3D7_1111600	348	S	___1	NDKS(1)QLDNIK	4	NNQYYKEINLTRNDKSQLDNIKSKEYNILQV
PF3D7_0416200		conserved protein, unknown function	0.430533	-1.60387	-1.17333	-1.55898	-1.64876	-1.18864	-1.15803	PF3D7_0416200	13	S	___1	VLDDEIMLS(1)DGR	9	___MDMKVLDDEIMLSDGRIIKMPVKNEEDK
PF3D7_1334500	MSRP6	MSP7-like protein	0.430303	-0.400593	0.0297098	-0.33774	-0.463446	0.0846004	-0.0251808	PF3D7_1334500	405	S	___1	NHSNYNYKPINQENLS(1)MYFNNNNKK	16	NHSNYNYKPINQENLSMYFNNNNKKKNKKNS
PF3D7_1454400	APP	aminopeptidase P	0.429328	-1.06415	-0.634819	-0.920849	-1.20745	-0.573719	-0.695919	PF3D7_1454400	585	T	___3	T(1)T(1)HFGEPT(1)AEEK	1	DSGGQYLHGTTDVTRTTHFGEPTAEEKRIYT
PF3D7_1454400	APP	aminopeptidase P	0.429328	-1.06415	-0.634819	-0.920849	-1.20745	-0.573719	-0.695919	PF3D7_1454400	586	T	___3	T(1)T(1)HFGEPT(1)AEEK	2	SGGQYLHGTTDVTRTTHFGEPTAEEKRIYTL
PF3D7_1454400	APP	aminopeptidase P	0.429328	-1.06415	-0.634819	-0.920849	-1.20745	-0.573719	-0.695919	PF3D7_1454400	592	T	___3	T(1)T(1)HFGEPT(1)AEEK	8	HGTTDVTRTTHFGEPTAEEKRIYTLVLKGHL
PF3D7_1011800	PREBP	PRE-binding protein	0.429168	-3.93896	-3.50979	-4.35154	-3.52639	-3.57205	-3.44754	PF3D7_1011800	604	S	___1	LDS(1)ILAR	3	KNLLNKNISKNIKLDSILARGFNKSILKEIE
PF3D7_1002400.2-p1		RNA-binding protein, putative	0.429132	2.78424	3.21337	2.78226	2.78621	3.22158	3.20516	PF3D7_1002400.2-p1;PF3D7_1002400	240;242	S	___1	YRNS(1)PDRS(1)PR	8	VSNSERRRYRNSPDRSPRYRRK_________
PF3D7_0708400	HSP90	heat shock protein 90	0.429063	1.07353	1.5026	1.22502	0.922045	1.3564	1.64879	PF3D7_0708400	281	T	___1	VEDVT(1)EELENAEK	5	EEDDNKTDHPKVEDVTEELENAEKKKKEKRK
PF3D7_0219700	GEXP20	Plasmodium exported protein (PHISTc), unknown function	0.428743	0.705692	1.13444	0.72142	0.689964	1.02715	1.24172	PF3D7_0219700	161	S	___1	INEEQYDRLS(1)DEEINDK	10	TDEMNKINEEQYDRLSDEEINDKLDNLDESV
PF3D7_0424700	FIKK4.2	serine/threonine protein kinase, FIKK family	0.428722	0.203353	0.632075	0.291721	0.114985	0.44623	0.817921	PF3D7_0424700	285	T	___1	S(0.066)IPT(0.6)VGFS(0.334)KDGDRLQEMYK	4	VNNVKYSDWKFKSIPTVGFSKDGDRLQEMYK
PF3D7_1438400	MCA2	metacaspase-like protein	0.428608	-0.418178	0.0104303	-0.35343	-0.482925	-0.0208092	0.0416698	PF3D7_1438400	395	T	___1	T(0.55)LS(0.45)NILK	1	VLLKSSPNTENTFNKTLSNILKEQPKRSSMF
PF3D7_1366900		conserved Plasmodium protein, unknown function	0.428564	6.93832	7.36689	7.06164	6.815	7.30893	7.42484	PF3D7_1366900	338	S	___1	EHS(1)NHTVNR	3	GPRNNVNNSEHMREHSNHTVNRFAPMGQYAN
PF3D7_0503300	SRSF12	serine/arginine-rich splicing factor 12	0.427943	1.05565	1.48359	0.956711	1.15458	1.4723	1.49488	PF3D7_0503300	255	S	___2	S(0.04)IS(0.964)FNS(0.996)EKDDAK	3	NSSKHSRKEHVSRSISFNSEKDDAKKKNDNT
PF3D7_0503300	SRSF12	serine/arginine-rich splicing factor 12	0.427943	1.05565	1.48359	0.956711	1.15458	1.4723	1.49488	PF3D7_0503300	258	S	___2	S(0.04)IS(0.964)FNS(0.996)EKDDAK	6	KHSRKEHVSRSISFNSEKDDAKKKNDNTSER
PF3D7_0919000	NAPS	nucleosome assembly protein	0.427857	0.174672	0.60253	0.21686	0.132484	0.60656	0.598499	PF3D7_0919000	170	T	___1	NPIAAVT(0.5)HNRS(0.5)DLDNEIPK	7	TRIKWKEGKNPIAAVTHNRSDLDNEIPKWSI
PF3D7_1200700	ACS7	acyl-CoA synthetase	0.427847	3.11761	3.54545	3.22421	3.01101	3.54178	3.54913	PF3D7_1200700	779	S	___1	S(0.073)GS(0.927)KADIK	3	KDDIKSGSKDDIKSGSKADIKSGSKDDIKSG
PF3D7_1473200		DnaJ protein, putative	0.427638	-2.82836	-2.40072	-2.92115	-2.73557	-2.58857	-2.21288	PF3D7_1473200	100	S	___2	MENQNTGNDVNSGNSENAEKS(0.999)EQS(0.001)EK	21	TGNDVNSGNSENAEKSEQSEKVEKVEKAEQS
PF3D7_1473200		DnaJ protein, putative	0.427638	-2.82836	-2.40072	-2.92115	-2.73557	-2.58857	-2.21288	PF3D7_1473200	103	S	___2	MENQNT(0.012)GNDVNS(0.298)GNS(0.298)ENAEKS(0.696)EQS(0.696)EKVEK	24	DVNSGNSENAEKSEQSEKVEKVEKAEQSENS
PF3D7_1201500		XPA binding protein 1, putative	0.427582	2.43319	2.86077	2.52142	2.34496	2.82085	2.90069	PF3D7_1201500	114	S	___1	REVSDLNT(0.002)YS(0.998)DNDVNVNINNSSNNIEK	10	ESSNEKREVSDLNTYSDNDVNVNINNSSNNI
PF3D7_1438400	MCA2	metacaspase-like protein	0.427427	0.938718	1.36615	0.909842	0.967594	1.32422	1.40807	PF3D7_1438400	1536	S	___1	NNINISDKYFLS(0.998)ET(0.002)DSPYIGK	12	EKIKNNINISDKYFLSETDSPYIGKKKALMI
PF3D7_1438400	MCA2	metacaspase-like protein	0.427368	-1.94402	-1.51665	-1.85418	-2.03386	-1.5596	-1.47371	PF3D7_1438400	708	T	___1	LITNIY(0.003)QFT(0.724)GGQS(0.273)QK	9	HHTYHEKLITNIYQFTGGQSQKSCNIKNQNV
PF3D7_1205500		zinc finger protein, putative	0.427263	-2.28375	-1.85648	-2.20056	-2.36694	-1.88639	-1.82658	PF3D7_1205500	1258	S	___1	NHNNSGSIDYLNDNEES(1)DNNNNNNNNNNSSTK	17	HNNSGSIDYLNDNEESDNNNNNNNNNNSSTK
PF3D7_0606000	KIC1	conserved Plasmodium protein, unknown function	0.426257	2.67964	3.1059	2.73023	2.62905	3.08362	3.12817	PF3D7_0606000	343	S	___1	FITFNTFDNHS(1)EGSVIFPMEK	11	KSDKKFITFNTFDNHSEGSVIFPMEKYRNFT
PF3D7_0517700	EIF3B	eukaryotic translation initiation factor 3 subunit B, putative	0.425579	-2.73506	-2.30948	-2.75338	-2.71673	-2.36334	-2.25562	PF3D7_0517700	19	S	___1	VRVS(1)DNELS(1)DKELVDFLS(1)EDS(1)DNGDENLLNK	18	VSDNELSDKELVDFLSEDSDNGDENLLNKKY
PF3D7_0517700	EIF3B	eukaryotic translation initiation factor 3 subunit B, putative	0.425579	-2.73506	-2.30948	-2.75338	-2.71673	-2.36334	-2.25562	PF3D7_0517700	22	S	___1	VRVS(1)DNELS(1)DKELVDFLS(1)EDS(1)DNGDENLLNK	21	NELSDKELVDFLSEDSDNGDENLLNKKYSDK
PF3D7_1033200	ETRAMP10.2	early transcribed membrane protein 10.2	0.425492	1.86624	2.29174	1.93941	1.79308	2.3184	2.26507	PF3D7_1033200	254	S	___1	RNS(0.984)S(0.016)EDKPTSESK	3	NDMDPLNPYGSSKRNSSEDKPTSESKGTTPE
PF3D7_0110400	RPB9	DNA-directed RNA polymerase II subunit RPB9, putative	0.424977	-1.49285	-1.06787	-1.47217	-1.51353	-1.19816	-0.93758	PF3D7_0110400	232	S	___1	KSNDKLQNEVQS(1)EGENDYDINVEEYFCEE	12	LNEKKSNDKLQNEVQSEGENDYDINVEEYFC
PF3D7_1253100		Plasmodium exported protein (PHISTa), unknown function	0.424247	0.627608	1.05186	0.643751	0.611465	0.98513	1.11858	PF3D7_1253100	286	S	___1	DT(0.013)LS(0.987)LK	4	KLINNFCNKYKKDTLSLK_____________
PF3D7_0918900	gammaGCS	gamma-glutamylcysteine synthetase	0.424198	-1.12315	-0.698955	-1.07979	-1.16652	-0.655369	-0.74254	PF3D7_0918900	316	Y	___1	S(0.077)CNDY(0.669)NNVNDS(0.124)S(0.124)NT(0.005)QDIFISSLKK	5	NKNKEKDNTPRSCNDYNNVNDSSNTQDIFIS
PF3D7_1022400	SRSF4	serine/arginine-rich splicing factor 4	0.423948	-3.04261	-2.61866	-3.07442	-3.01081	-2.44663	-2.7907	PF3D7_1022400	245	S	___1	YESHS(0.001)QS(0.085)LS(0.915)DNR	9	SNKRNNKYESHSQSLSDNRNSYRNRSKGKKR
PF3D7_0202000	KAHRP	knob-associated histidine-rich protein	0.423537	1.84353	2.26707	1.82645	1.86061	2.24681	2.28732	PF3D7_0202000	604	T	___2	GASTTAGS(0.012)T(0.867)T(0.867)GAT(0.214)T(0.04)GANAVQSK	9	TTEGATKGASTTAGSTTGATTGANAVQSKDE
PF3D7_1149000	Pf332	antigen 332, DBL-like protein	0.423407	-1.87618	-1.45277	-1.7242	-2.02815	-1.39555	-1.50999	PF3D7_1149000	3076	S	___1	EGSAT(0.022)EEIVQDGS(0.715)GT(0.263)NDFVGK	13	LEKEGSATEEIVQDGSGTNDFVGKQGSVIEE
PF3D7_0404300		conserved Plasmodium protein, unknown function	0.423307	1.29806	1.72136	1.19796	1.39816	1.75214	1.69059	PF3D7_0404300	3	S	___1	MKS(0.997)DVS(0.003)K	3	_____________MKSDVSKTKETDSKIANS
PF3D7_1033600	CEF1	myb2 transcription factor, putative	0.422762	-3.6585	-3.23574	-3.55855	-3.75846	-3.08153	-3.38995	PF3D7_1033600	517	S	___3	NIS(1)LYAHSIISYK	3	KNKIISDIKSFKKNISLYAHSIISYKNLKND
PF3D7_1033600	CEF1	myb2 transcription factor, putative	0.422762	-3.6585	-3.23574	-3.55855	-3.75846	-3.08153	-3.38995	PF3D7_1033600	522	S	___3	NIS(0.997)LY(0.003)AHS(1)IISYK	8	SDIKSFKKNISLYAHSIISYKNLKNDQSMMD
PF3D7_1033600	CEF1	myb2 transcription factor, putative	0.422762	-3.6585	-3.23574	-3.55855	-3.75846	-3.08153	-3.38995	PF3D7_1033600	525	S	___3	NIS(0.993)LY(0.038)AHS(0.969)IIS(0.992)Y(0.009)K	11	KSFKKNISLYAHSIISYKNLKNDQSMMDNQT
PF3D7_0916700	HoMu	RNA-binding protein musashi, putative	0.422727	3.97412	4.39684	4.02109	3.92715	4.37384	4.41985	PF3D7_0916700	34	S	___1	SVEEHNIDDKS(1)LRDEDNK	11	VQDKKSVEEHNIDDKSLRDEDNKSIKEGNNN
PF3D7_0202000	KAHRP	knob-associated histidine-rich protein	0.422662	1.66127	2.08393	1.75645	1.5661	2.08758	2.08029	PF3D7_0202000	540	T	___1	GQCAAEGAT(1)KGATK	9	TNAATNKGQCAAEGATKGATKEASTSKEATK
PF3D7_1478600	PTP3	EMP1-trafficking protein	0.422563	2.843	3.26556	2.97788	2.70812	3.30954	3.22159	PF3D7_1478600	356	S	___1	LNS(0.999)KS(0.001)NNMNGVK	3	MTKPKTDTTQQIRLNSKSNNMNGVKSNVTTS
PF3D7_0202000	KAHRP	knob-associated histidine-rich protein	0.422093	2.57485	2.99694	2.5298	2.61989	2.97511	3.01877	PF3D7_0202000	604	T	___1	GASTTAGS(0.012)T(0.867)T(0.867)GAT(0.214)T(0.04)GANAVQSK	9	TTEGATKGASTTAGSTTGATTGANAVQSKDE
PF3D7_0202000	KAHRP	knob-associated histidine-rich protein	0.422038	2.62651	3.04855	2.5352	2.71782	3.00764	3.08946	PF3D7_0202000	559	T	___2	EAS(0.004)T(0.011)S(0.012)KEAT(0.969)KEAS(0.165)T(0.728)S(0.111)K	14	TKEASTSKEATKEASTSKEATKEASTSKEAT
PF3D7_0927600		RNA-binding protein, putative	0.421957	0.498953	0.92091	0.45561	0.542295	1.09341	0.748409	PF3D7_0927600	302	S	___1	NKEENCQS(1)R	8	LQNPVSNKNKEENCQSRDSSKRRNSVSKSSK
PF3D7_0923400		conserved Plasmodium protein, unknown function	0.421953	0.127197	0.54915	0.165421	0.088974	0.431671	0.66663	PF3D7_0923400	72	T	___2	GKT(0.997)QS(0.944)Y(0.067)RS(0.978)Y(0.014)EYK	3	NDEHDIYEDNYSRGKTQSYRSYEYKLEHIMK
PF3D7_1442900	ARFGEF	protein transport protein SEC7, putative	0.421859	-0.423428	-0.00156879	-0.37644	-0.470415	-0.0323486	0.029211	PF3D7_1442900	1989	S	___1	SDVHHHS(1)FLK	7	NVSAHHTNKSDVHHHSFLKSHTLSHHHNNNY
PF3D7_1026000		conserved Plasmodium protein, unknown function	0.421638	-0.451452	-0.0298147	-0.45657	-0.446335	-0.00895882	-0.0506706	PF3D7_1026000	218	S	___1	NNIHDNKENS(1)PCNIIDVNNDDKLK	10	DENCYKNNIHDNKENSPCNIIDVNNDDKLKK
PF3D7_1313000	NEDD8	ubiquitin-like protein nedd8 homologue, putative	0.421558	-0.962757	-0.541199	-1.16185	-0.763664	-0.492208	-0.590189	PF3D7_1313000	14	S	___1	RQS(1)FNFEPSSSVFQIK	3	__MQILVKTLTGKRQSFNFEPSSSVFQIKMA
PF3D7_1142100		conserved Plasmodium protein, unknown function	0.420928	-2.20719	-1.78626	-2.04213	-2.37226	-1.78777	-1.78476	PF3D7_1142100	493	Y	___1	ENNCEY(0.535)T(0.465)DVDETSNVFNNLSDNYIK	6	YYANEFSHVKENNCEYTDVDETSNVFNNLSD
PF3D7_1139300	ApiAP2	AP2 domain transcription factor, putative	0.420883	1.16443	1.58531	1.30772	1.02114	1.58282	1.5878	PF3D7_1139300	1790	S	___2	S(0.005)FDKCS(0.989)NENS(0.557)VCINKS(0.45)NEK	6	NNTDNSKILRSFDKCSNENSVCINKSNEKLE
PF3D7_0500800	MESA	mature parasite-infected erythrocyte surface antigen	0.420513	-1.55999	-1.13947	-1.73225	-1.38773	-1.31205	-0.9669	PF3D7_0500800	351	S	___1	VSGPY(0.002)ENS(0.894)ENS(0.887)NVT(0.492)S(0.517)ES(0.105)EET(0.104)KK	11	REGNKVSGPYENSENSNVTSESEETKKLAEK
PF3D7_1445400	CLK1	protein serine/threonine kinase-1	0.420188	2.03204	2.45223	2.09392	1.97017	2.44638	2.45808	PF3D7_1445400	269	S	___2	DIY(0.012)QPS(0.663)S(0.663)S(0.663)LHKYK	6	SRWEDNYTYKDIYQPSSSLHKYKRRSNFTRD
PF3D7_1445400	CLK1	protein serine/threonine kinase-1	0.420188	2.03204	2.45223	2.09392	1.97017	2.44638	2.45808	PF3D7_1445400	270	S	___2	DIYQPS(0.507)S(0.765)S(0.729)LHK	7	RWEDNYTYKDIYQPSSSLHKYKRRSNFTRDD
PF3D7_1212700	EIF3A	eukaryotic translation initiation factor 3 subunit A, putative	0.419748	0.166142	0.585891	0.0289707	0.303314	0.568851	0.60293	PF3D7_1212700	458	S	___1	KKS(1)EDFTK	3	VLAVLSIPVIGNKKKSEDFTKQFEAHKKMSQ
PF3D7_0831700	HSP70x	heat shock protein 70	0.419657	-0.367052	0.0526047	-0.3174	-0.416704	-0.13533	0.24054	PF3D7_0831700	111	T	___1	FS(0.034)ET(0.287)T(0.679)VQSDMK	5	VFDAKRLIGRKFSETTVQSDMKHWPFTVKGG
PF3D7_0401800	PfD80	Plasmodium exported protein (PHISTb), unknown function	0.419563	0.895018	1.31458	0.98073	0.809305	1.25381	1.37535	PF3D7_0401800	175	T	___2	SAST(0.002)AS(0.998)T(0.999)AS(0.999)AAS(0.001)AASTTR	7	SASTASTARSASTASTASAASAASTTRSASA
PF3D7_0807600		conserved Plasmodium protein, unknown function	0.419497	-2.04436	-1.62486	-2.00002	-2.0887	-1.70921	-1.54051	PF3D7_0807600	433	S	___1	DVNLINSSDINLEDNNEDIS(1)NHDKEK	20	INSSDINLEDNNEDISNHDKEKDNNNKKDDD
PF3D7_0501400	FIRA	interspersed repeat antigen	0.419393	-0.260972	0.158421	-0.168119	-0.353825	0.158751	0.158091	PF3D7_0501400	685	S	___3	KAS(0.014)EGDNIS(0.983)LS(0.947)S(0.949)LS(0.106)EET(0.001)QEK	11	HADEKKASEGDNISLSSLSEETQEKSHTKKK
PF3D7_0729100		conserved Plasmodium protein, unknown function	0.419067	-2.27806	-1.85899	-2.28505	-2.27107	-1.91104	-1.80695	PF3D7_0729100	1076	S	___1	IQNMEEHEYIPCAS(0.884)NKS(0.895)IS(0.101)NNY(0.121)HVLSK	17	QNMEEHEYIPCASNKSISNNYHVLSKSEYDK
PF3D7_0501400	FIRA	interspersed repeat antigen	0.418867	1.35062	1.76949	1.46956	1.23169	1.59189	1.94709	PF3D7_0501400	420	S	___3	KGS(1)EGDNIS(1)LS(0.944)S(0.055)LS(0.001)EETQEK	9	EEHIDEKKGSEGDNISLSSLSEETQEKSHTK
PF3D7_1022400	SRSF4	serine/arginine-rich splicing factor 4	0.418863	-0.155703	0.263161	-0.223989	-0.0874157	0.215961	0.31036	PF3D7_1022400	349	S	___1	T(1)VS(1)EDRS(1)ER	7	DNRSHSRRRTVSEDRSERRRSLSEDRSNSRK
PF3D7_1013200		conserved Plasmodium protein, unknown function	0.418848	-2.27973	-1.86088	-2.2568	-2.30267	-1.90788	-1.81389	PF3D7_1013200	321	S	___1	KPNNIENNEES(0.073)NCDNNS(0.927)VNKENSNGVK	17	PNNIENNEESNCDNNSVNKENSNGVKDASKE
PF3D7_1127800		conserved Plasmodium protein, unknown function	0.418498	2.78873	3.20723	2.84128	2.73618	3.24533	3.16912	PF3D7_1127800	969	S	___1	LQEEEEEYS(1)FYEDMKK	9	NEMVNIKLQEEEEEYSFYEDMKKYQDEDIVE
PF3D7_1473700	NUP116	nucleoporin NUP116/NSP116, putative	0.418008	1.1506	1.56861	1.17914	1.12206	1.60774	1.52948	PF3D7_1473700	983	S	___2	GREEDDNKY(0.07)S(0.965)S(0.964)DS(0.001)FIK	10	KMKRKRGREEDDNKYSSDSFIKRKKCSKMNP
PF3D7_1473700	NUP116	nucleoporin NUP116/NSP116, putative	0.418008	1.1506	1.56861	1.17914	1.12206	1.60774	1.52948	PF3D7_1473700	984	S	___2	GREEDDNKY(0.07)S(0.965)S(0.964)DS(0.001)FIK	11	MKRKRGREEDDNKYSSDSFIKRKKCSKMNPH
PF3D7_0316500	NUF2	kinetochore protein NUF2, putative	0.417898	1.90982	2.32772	1.96464	1.85501	2.26999	2.38545	PF3D7_0316500	258	S	___1	KEDLEDQIVPS(1)PEK	11	RYRQKKEDLEDQIVPSPEKLQKYNEELKDHL
PF3D7_0507100	RPL4	60S ribosomal protein L4	0.417892	0.482573	0.900465	0.44873	0.516415	0.90761	0.89332	PF3D7_0507100	318	S	___1	LQNKNS(1)LTNFAVR	6	LAKKKPCKKRLQNKNSLTNFAVRCRLNPAYK
PF3D7_1334500	MSRP6	MSP7-like protein	0.417687	0.586793	1.00448	0.76358	0.410006	1.00048	1.00848	PF3D7_1334500	99	S	___1	YGEGS(1)IFYDESK	5	VLEYVGDSTGKYGEGSIFYDESKKYNYRKYL
PF3D7_0401800	PfD80	Plasmodium exported protein (PHISTb), unknown function	0.417638	1.02898	1.44662	1.01181	1.04615	1.38578	1.50746	PF3D7_0401800	307	T	___1	LEDYEKEGS(1)NVDIT(1)EEEEK	14	SRLEDYEKEGSNVDITEEEEKEAESVDDNNK
PF3D7_0306800	CCT2	T-complex protein 1 subunit beta	0.417348	-0.843967	-0.42662	-0.86335	-0.824585	-0.42149	-0.431749	PF3D7_0306800	335	S	___1	LANCLDAEIAS(0.971)T(0.029)FEK	11	DGMERLANCLDAEIASTFEKDLNIKLGYCDK
PF3D7_0303200		HAD superfamily protein, putative	0.417182	-2.50093	-2.08375	-2.51634	-2.48552	-2.02718	-2.14031	PF3D7_0303200	316	S	___1	NLS(0.405)ES(0.595)HVR	5	SKDDPVYIPKRNLSESHVRKTGKKKKLIKDR
PF3D7_0813300		conserved Plasmodium protein, unknown function	0.417158	2.20655	2.62371	2.24507	2.16802	2.64355	2.60386	PF3D7_0813300	245	S	___1	SLDNKS(1)DGPLK	6	KGGDKKKNKRSLDNKSDGPLKKSKIDDEGQF
PF3D7_0401800	PfD80	Plasmodium exported protein (PHISTb), unknown function	0.417068	2.83286	3.24993	2.85468	2.81104	3.23056	3.26929	PF3D7_0401800	302	S	___1	LEDYEKEGS(1)NVDITEEEEK	9	PSTGSSRLEDYEKEGSNVDITEEEEKEAESV
PF3D7_0714300	DHHC4	palmitoyltransferase DHHC4, putative	0.416588	-0.883793	-0.467205	-0.91407	-0.853516	-0.46847	-0.46594	PF3D7_0714300	485	S	___1	KGS(0.291)DS(0.658)ENVT(0.051)CDIEETNQVPVKK	5	RYSKIKLPKVKKGSDSENVTCDIEETNQVPV
PF3D7_1007900	EIF3D	eukaryotic translation initiation factor 3 subunit D, putative	0.416389	1.1859	1.60229	1.17853	1.19326	1.56993	1.63464	PF3D7_1007900	542	S	___1	LYCTHEDS(1)N	8	DPLKPLLRLYCTHEDSN______________
PF3D7_1246600	BUD13	pre-mRNA-splicing factor CWC26, putative	0.416348	-2.20441	-1.78806	-2.0726	-2.33622	-1.74392	-1.8322	PF3D7_1246600	306	Y	___1	NIINYEFDS(0.44)DY(0.56)DIELK	11	LIKKKNIINYEFDSDYDIELKMKKRKDDPMN
PF3D7_0307700		conserved Plasmodium protein, unknown function	0.415993	-3.12064	-2.70464	-3.11603	-3.12525	-2.57457	-2.83472	PF3D7_0307700	80	S	___1	KKEDYNNDNNNVDNMNNS(0.089)NNQS(0.089)DS(0.821)ICGIY(0.001)R	24	NNNVDNMNNSNNQSDSICGIYRLNSSQLLNE
PF3D7_1002400.2-p1		RNA-binding protein, putative	0.415848	-0.469242	-0.0533943	-0.456509	-0.481976	-0.0695992	-0.0371895	PF3D7_1002400.2-p1;PF3D7_1002400	228;230	S	___1	STSVSNS(1)ER	7	KKRYDRVRKSTSVSNSERRRYRNSPDRSPRY
PF3D7_1140700		conserved Plasmodium protein, unknown function	0.415817	-2.07048	-1.65466	-2.1098	-2.03116	-1.76187	-1.54746	PF3D7_1140700	2118	T	___1	IDHNINNCINNGGVLT(1)DNDIENIDYIK	16	IDHNINNCINNGGVLTDNDIENIDYIKKDFN
PF3D7_1206800		conserved Plasmodium protein, unknown function	0.415557	-2.65445	-2.23889	-2.62446	-2.68443	-2.13852	-2.33926	PF3D7_1206800	406	Y	___1	Y(0.5)CDES(0.5)DDEDIYTDNIIFSQIHGLK	1	YNTDIQLKLDKQFNRYCDESDDEDIYTDNII
PF3D7_1207000		conserved Plasmodium protein, unknown function	0.414747	1.40682	1.82156	1.44355	1.37008	1.80958	1.83355	PF3D7_1207000	486	S	___1	DKYES(1)EQKFNISNEK	5	LNNLLNNRNVKDKYESEQKFNISNEKEMQDT
PF3D7_1142100		conserved Plasmodium protein, unknown function	0.414437	-0.572397	-0.15796	-0.478119	-0.666676	-0.14974	-0.16618	PF3D7_1142100	507	S	___2	ENNCEY(0.231)T(0.769)DVDETSNVFNNLS(1)DNYIK	20	EYTDVDETSNVFNNLSDNYIKNKNIRKQKRK
PF3D7_0801800		mannose-6-phosphate isomerase, putative	0.414308	1.56954	1.98385	1.60992	1.52917	1.95258	2.01512	PF3D7_0801800	592	S	___1	FNTDLT(1)ES(1)DMDEVDEDEKDEK	8	QNSLSENKFNTDLTESDMDEVDEDEKDEKTI
PF3D7_1410400	RAP1	rhoptry-associated protein 1	0.413987	1.98191	2.3959	2.02049	1.94333	2.3797	2.41209	PF3D7_1410400	106	S	___1	S(0.156)AS(0.844)AAAILEEDDSKDDMEFK	3	KSSKKGHGRSRVRSASAAAILEEDDSKDDME
PF3D7_0519700		FoP domain-containing protein, putative	0.413973	1.32879	1.74276	1.27362	1.38396	1.85844	1.62708	PF3D7_0519700	144	T	___1	LT(0.68)S(0.32)KDLDDELDKYMGSSNVK	2	FFRKNQNLHDKIGKLTSKDLDDELDKYMGSS
PF3D7_1445400	CLK1	protein serine/threonine kinase-1	0.413877	-0.728152	-0.314275	-0.920269	-0.536036	-0.209499	-0.41905	PF3D7_1445400	64	Y	___1	NNS(0.009)NNNNNGY(0.551)Y(0.431)Y(0.009)HNYNNGYQIR	10	YYYDTRNNSNNNNNGYYYHNYNNGYQIRNKR
PF3D7_1237200		conserved Plasmodium protein, unknown function	0.413809	-0.771208	-0.357399	-0.79286	-0.749556	-0.434309	-0.280489	PF3D7_1237200	1506	S	___1	IQNHHNNLDDNYS(1)KR	13	DERIQNHHNNLDDNYSKRNSEQSDAEESSEG
PF3D7_0824800		conserved Plasmodium membrane protein, unknown function	0.413413	0.920563	1.33398	0.989311	0.851814	1.26158	1.40637	PF3D7_0824800	638	S	___1	NFITPYHENNNDNLS(1)DT(1)LQDER	15	KNFITPYHENNNDNLSDTLQDERSIKSDINM
PF3D7_0110700	CAF1C	chromatin assembly factor 1 protein WD40 domain, putative	0.413033	0.380218	0.79325	0.303961	0.456474	0.8242	0.7623	PF3D7_0110700	12	S	___1	RKS(1)NALDEACLELSEEVENDVSHEK	3	____MSSPKESKKRKSNALDEACLELSEEVE
PF3D7_0808300		ubiquitin regulatory protein, putative	0.412932	0.153553	0.566485	0.173931	0.133175	0.419891	0.713079	PF3D7_0808300	6	S	___1	S(0.5)LS(0.5)DLKKDDK	1	__________MSNIRSLSDLKKDDKKNNERV
PF3D7_0825000		conserved Plasmodium protein, unknown function	0.412787	0.877958	1.29075	0.914331	0.841585	1.24093	1.34056	PF3D7_0825000	390	S	___2	YEKDHNIYNDLS(1)DDGKS(1)IDR	12	KYNKYEKDHNIYNDLSDDGKSIDRTNVYDNN
PF3D7_0825000		conserved Plasmodium protein, unknown function	0.412787	0.877958	1.29075	0.914331	0.841585	1.24093	1.34056	PF3D7_0825000	395	S	___2	YEKDHNIYNDLS(1)DDGKS(1)IDR	17	EKDHNIYNDLSDDGKSIDRTNVYDNNSSSHN
PF3D7_1466100	PPKL	protein phosphatase containing kelch-like domains	0.412783	-0.100307	0.312475	-0.0983391	-0.102276	0.28948	0.33547	PF3D7_1466100	368	S	___1	HS(0.004)S(0.989)S(0.007)DLR	3	SLKQKQLTNDNLKHSSSDLRNVNSYNLNSQD
PF3D7_0219600	RFC1	replication factor C subunit 1, putative	0.412746	-0.235601	0.177145	-0.197779	-0.273424	0.1444	0.20989	PF3D7_0219600	310	T	___1	LLPQTDQT(0.022)QENDKT(0.552)YAS(0.417)DT(0.008)IK	14	LKLLPQTDQTQENDKTYASDTIKTENKDKNY
PF3D7_1238300	CWC22	pre-mRNA-splicing factor CWC22, putative	0.412457	3.13557	3.54803	3.2221	3.04905	3.47964	3.61642	PF3D7_1238300	688	S	___1	HISEELLFGDDS(1)ADEK	12	NEWKHISEELLFGDDSADEKKNKKTKKQKKK
PF3D7_0606000	KIC1	conserved Plasmodium protein, unknown function	0.412372	-1.13855	-0.72618	-1.02922	-1.24788	-0.7635	-0.68886	PF3D7_0606000	536	S	___1	NNSIYDNICDS(1)FKR	11	KKGDRNNSIYDNICDSFKRQESVSKSLLFSD
PF3D7_0818900	HSP70	heat shock protein 70	0.412067	-4.48285	-4.07078	-4.24578	-4.71992	-3.83851	-4.30306	PF3D7_0818900	7	S	___1	GS(0.959)KPNLPES(0.032)NIAIGIDLGT(0.005)T(0.001)Y(0.001)S(0.001)CVGVWR	2	_________MASAKGSKPNLPESNIAIGIDL
PF3D7_1103700	CK2beta1	casein kinase II beta chain	0.411838	1.70562	2.11746	1.65043	1.76081	2.10472	2.13019	PF3D7_1103700	18	S	___1	SDKS(0.969)T(0.023)S(0.008)WVK	4	NSDSNKDLQDSKSDKSTSWVKWFNNRALSNF
PF3D7_1107300	PAIP1	polyadenylate-binding protein-interacting protein 1, putative	0.411668	0.417838	0.829506	0.29178	0.543896	0.829731	0.829281	PF3D7_1107300	233	S	___1	S(1)YNESK	1	NNNYSNNNSSSNSSRSYNESKKSSKDENNNN
PF3D7_1357700	UTP21	U3 small nucleolar RNA-associated protein 21, putative	0.411633	-0.854797	-0.443165	-0.75174	-0.957855	-0.44795	-0.438379	PF3D7_1357700	1060	S	___1	T(0.002)S(0.002)EQES(0.996)QQQDEQEENQESNVESK	6	QNVTNNLENKTSEQESQQQDEQEENQESNVE
PF3D7_1436300	PTEX150	translocon component PTEX150	0.411403	0.964948	1.37635	0.98502	0.944876	1.32133	1.43137	PF3D7_1436300	550	T	___1	MSVS(0.205)T(0.795)HNK	5	SSQFDNNKKNKMSVSTHNKKSKNLMDSLDLE
PF3D7_1362700		conserved Plasmodium protein, unknown function	0.411338	-0.0679474	0.34339	-0.0502796	-0.0856152	0.218161	0.46862	PF3D7_1362700	917	S	___1	EGSNVNS(0.996)CT(0.004)EENTGANNK	7	MNSSNNHFREGSNVNSCTEENTGANNKEKIF
PF3D7_0831700	HSP70x	heat shock protein 70	0.410953	-0.606427	-0.195475	-0.44944	-0.763414	-0.350899	-0.0400505	PF3D7_0831700	663	S	___1	GRNS(1)ENKEAQNNGPTVEEVN	4	QEPQKAEATNLRGRNSENKEAQNNGPTVEEV
PF3D7_1149000	Pf332	antigen 332, DBL-like protein	0.410728	-2.46404	-2.05332	-2.31925	-2.60884	-1.99316	-2.11347	PF3D7_1149000	1460	S	___1	S(0.544)VS(0.456)EEVLEEEGSTTEK	1	VEVASITEEVEEEEKSVSEEVLEEEGSTTEK
PF3D7_0319700	ABCI3	ABC transporter I family member 1, putative	0.410262	3.1539	3.56417	3.23162	3.07619	3.65045	3.47788	PF3D7_0319700	2441	S	___1	GQS(1)DDDNDEEKNFNK	3	MLYKETEIDKYYKGQSDDDNDEEKNFNKISQ
PF3D7_1241200		conserved Plasmodium protein, unknown function	0.410103	-0.497707	-0.0876045	-0.62612	-0.369295	-0.0949097	-0.0802994	PF3D7_1241200	1400	S	___1	NNS(1)HINNK	3	YSEHVNTDRSYIKNNSHINNKLSICMDNNKK
PF3D7_0206300	AROM	pentafunctional AROM polypeptide, putative, pseudogene	0.410088	4.36338	4.77347	4.37587	4.35089	4.75766	4.78927	PF3D7_0206300	1953	T	___1	GS(0.001)T(0.999)PDEKYK	3	NLLHCTKKKRPQRGSTPDEKYKGGEIKGNDI
PF3D7_1238300	CWC22	pre-mRNA-splicing factor CWC22, putative	0.409978	1.10413	1.51411	0.933401	1.27485	1.48537	1.54284	PF3D7_1238300	202	S	___1	RKGS(1)YEGK	4	SVYNMKRNKKDKRKGSYEGKNVYIRRSVSSR
PF3D7_1418200		conserved Plasmodium protein, unknown function	0.409922	0.629893	1.03981	0.548851	0.710936	1.08741	0.99222	PF3D7_1418200	2	S	___1	S(0.949)ET(0.051)NKQNDNKK	1	______________MSETNKQNDNKKNKITR
PF3D7_1227700	KIC2	conserved Plasmodium protein, unknown function	0.408962	1.6009	2.00986	1.65657	1.54523	1.97669	2.04304	PF3D7_1227700	101	S	___2	ECNDS(1)HKDISLSR	5	CNTNIILPIVKECNDSHKDISLSRNENSIHN
PF3D7_1227700	KIC2	conserved Plasmodium protein, unknown function	0.408962	1.6009	2.00986	1.65657	1.54523	1.97669	2.04304	PF3D7_1227700	106	S	___2	ECNDS(1)HKDIS(0.984)LS(0.016)R	10	ILPIVKECNDSHKDISLSRNENSIHNISENS
PF3D7_1425900		conserved Plasmodium protein, unknown function	0.408897	-0.0657225	0.343175	0.0185699	-0.150015	0.229071	0.457279	PF3D7_1425900	362	S	___1	LIEGSNS(1)R	7	NDIENVTNKLIEGSNSREAIAT_________
PF3D7_1207000		conserved Plasmodium protein, unknown function	0.408857	-0.211017	0.197841	-0.189878	-0.232155	0.113201	0.28248	PF3D7_1207000	905	S	___1	VEMLS(1)DKEKEIEK	5	MKKRKDNFEKKVEMLSDKEKEIEKIHSQIKE
PF3D7_0905800		conserved Plasmodium protein, unknown function	0.408837	3.51324	3.92208	3.57761	3.44888	4.03628	3.80788	PF3D7_0905800	828	S	___1	FTYDES(1)PFDNNINVK	6	SKFSTKRTNKFTYDESPFDNNINVKDAKQNI
PF3D7_0503300	SRSF12	serine/arginine-rich splicing factor 12	0.408607	-0.481977	-0.07337	-0.459959	-0.503996	-0.22979	0.0830498	PF3D7_0503300	235	S	___1	SKYNHSNDDYS(1)DETR	11	NENYKSKYNHSNDDYSDETRNSSKHSRKEHV
PF3D7_0302500	CLAG3.1	cytoadherence linked asexual protein 3.1;cytoadherence linked asexual protein 3.2	0.408553	-0.00555229	0.403001	-0.13974	0.128635	0.321911	0.484091	PF3D7_0302500;PF3D7_0302200	530;532	S	___1	QIS(0.989)KDS(0.011)NLLNNITK	3	IQCIEKCHSDQARQISKDSNLLNNITKCDLC
PF3D7_1466800		conserved Plasmodium protein, unknown function	0.408513	1.69305	2.10156	1.65546	1.73063	2.11252	2.0906	PF3D7_1466800	625	S	___1	Y(0.001)S(0.397)T(0.602)DS(1)DDIERR	5	LYNSMKNDAYKYSTDSDDIERRLTKGIENEK
PF3D7_0511500		RNA pseudouridylate synthase, putative	0.408413	1.84657	2.25499	1.76624	1.9269	2.34686	2.16311	PF3D7_0511500	9907	S	___1	S(0.007)S(0.007)S(0.985)NIR	3	NTSGNMKNSSNIRSSSNIRSSNNIKSSSNIK
PF3D7_1473700	NUP116	nucleoporin NUP116/NSP116, putative	0.408373	-0.215407	0.192966	-0.19981	-0.231005	0.121141	0.26479	PF3D7_1473700	984	S	___1	GREEDDNKY(0.07)S(0.965)S(0.964)DS(0.001)FIK	11	MKRKRGREEDDNKYSSDSFIKRKKCSKMNPH
PF3D7_0316700	YOP1	protein YOP1, putative	0.407659	3.07042	3.47808	2.99148	3.14936	3.64185	3.31431	PF3D7_0316700	28	S	___1	IS(0.006)S(0.994)NVFGEK	3	EDRPNTSLNSLKRISSNVFGEKLNNLDVSRV
PF3D7_1013900		translation initiation factor eIF-2B subunit delta, putative	0.407413	0.114747	0.52216	0.0363998	0.193094	0.61784	0.426479	PF3D7_1013900	179	S	___2	T(0.027)LNS(0.973)CLLNECPHFS(0.002)DS(0.634)S(0.364)NLEYRDEER	16	TLNSCLLNECPHFSDSSNLEYRDEERKKNDG
PF3D7_0702300	STARP	sporozoite threonine and asparagine-rich protein	0.407258	-0.927888	-0.52063	-0.74662	-1.10916	-0.482	-0.559259	PF3D7_0702300	95	S	___1	YNSENTNTNNNIPES(0.048)S(0.948)S(0.004)T(0.001)YTNTR	16	YNSENTNTNNNIPESSSTYTNTRLAANNSTT
PF3D7_1007700	AP2-I	AP2 domain transcription factor, putative	0.406919	-0.065093	0.341825	0.0448399	-0.175026	0.42893	0.254721	PF3D7_1007700	738	S	___1	KLS(1)EES(1)QMLLDDMEQTLCR	6	KRGRGRPPKRKLSEESQMLLDDMEQTLCRNN
PF3D7_0318200	RPB1	DNA-directed RNA polymerase II subunit RPB1	0.406472	-1.32646	-0.919985	-1.19521	-1.4577	-0.932949	-0.907021	PF3D7_0318200	2163	T	___2	LGGKFS(0.281)PT(0.729)QS(0.99)PK	8	INNLDTLKLGGKFSPTQSPKSPTSVMHSPFS
PF3D7_0202000	KAHRP	knob-associated histidine-rich protein	0.406463	-1.32614	-0.919675	-1.24263	-1.40965	-0.90802	-0.93133	PF3D7_0202000	590	T	___3	EAS(0.773)T(0.231)T(0.996)EGATK	5	KEASTSKGATKEASTTEGATKGASTTAGSTT
PF3D7_0504000	ATPase3	cation transporting P-ATPase	0.406447	4.11134	4.51779	4.12575	4.09694	4.55083	4.48475	PF3D7_0504000	1016	S	___1	SISNSVNNIYPNKLLS(1)DDDLK	16	SISNSVNNIYPNKLLSDDDLKQIKNQTSLLN
PF3D7_0601900		conserved Plasmodium protein, unknown function	0.406432	1.16053	1.56696	1.14063	1.18043	1.32677	1.80715	PF3D7_0601900	119	S	___2	S(0.004)HS(0.04)S(0.04)S(0.394)S(0.547)S(0.975)VY(0.001)ASANAEN	7	SSSSRQAARSHSSSSSVYASANAEN______
PF3D7_0904900	CuTP	copper-transporting ATPase	0.406378	-2.70577	-2.29939	-2.71474	-2.6968	-2.29129	-2.30749	PF3D7_0904900	361	S	___1	NY(0.001)NNS(0.007)NDNY(0.022)NS(0.843)NNNY(0.126)Y(0.001)YDYNEEK	11	NVENKNYNNSNDNYNSNNNYYYDYNEEKLKK
PF3D7_1303500	NHE	sodium/hydrogen exchanger, Na+, H+ antiporter	0.406102	-0.989647	-0.583545	-1.11329	-0.866005	-0.77339	-0.3937	PF3D7_1303500	996	S	___2	IS(1)IDNSYKGEMR	2	IHNRYRSLNVISRKISIDNSYKGEMRINVIR
PF3D7_0925400		protein phosphatase-beta	0.405792	-0.974147	-0.568355	-0.832788	-1.11551	-0.519669	-0.617041	PF3D7_0925400	100	S	___1	ELS(1)DEEVSSENEYNK	3	EDNYNIYDNLSVKELSDEEVSSENEYNKKIK
PF3D7_1473200		DnaJ protein, putative	0.405428	-1.92609	-1.52066	-1.95905	-1.89314	-1.45074	-1.59059	PF3D7_1473200	91	S	___1	MENQNTGNDVNS(1)GNS(1)ENAEK	12	NTAKMENQNTGNDVNSGNSENAEKSEQSEKV
PF3D7_1442400	KIC9	conserved Plasmodium protein, unknown function	0.405107	-1.53345	-1.12834	-1.39962	-1.66727	-1.0187	-1.23798	PF3D7_1442400	853	S	___1	NFDDY(0.023)S(0.531)KCS(0.446)PNKQNK	6	NLNTLITNVKNFDDYSKCSPNKQNKNNKILT
PF3D7_1129400	NOP2	rRNA (cytosine-C(5))-methyltransferase, putative	0.405033	4.64718	5.05222	4.74835	4.54601	5.01412	5.09031	PF3D7_1129400	2	S	___1	S(1)NAEALNDNKNDEDEYKEK	1	______________MSNAEALNDNKNDEDEY
PF3D7_1322100	SET2	histone-lysine N-methyltransferase SET2	0.404878	-3.94748	-3.5426	-4.08594	-3.80902	-3.5294	-3.5558	PF3D7_1322100	1738	S	___1	HNEQDS(1)INNAK	6	NEQGSINNAKHNEQDSINNAKQNEQDSINNA
PF3D7_1326300		RNA-binding protein, putative	0.404768	-3.22774	-2.82297	-3.05649	-3.399	-2.77313	-2.87282	PF3D7_1326300	147	S	___1	S(1)GRDDKYDR	1	DRDRDRERRSIREERSGRDDKYDRRKKRRHS
PF3D7_1341200		60S ribosomal protein L18, putative	0.404572	-0.376897	0.0276756	-0.357079	-0.396715	-0.00698853	0.0623398	PF3D7_1341200	129	S	___1	AS(0.003)S(0.997)INIIR	3	QLYSEMAGRHRARASSINIIRISEISSSLVR
PF3D7_1016700		Plasmodium exported protein (PHISTc), unknown function	0.404037	0.135978	0.540015	0.1196	0.152355	0.54435	0.535681	PF3D7_1016700	181	S	___1	CLDY(0.001)DLS(0.999)LLEK	7	GNTSQSNTKCLDYDLSLLEKSFQGMSFNTHS
PF3D7_0202000	KAHRP	knob-associated histidine-rich protein	0.403937	1.70106	2.10499	1.67239	1.72972	2.06584	2.14415	PF3D7_0202000	605	T	___2	GASTTAGS(0.01)T(0.099)T(0.888)GAT(0.003)TGANAVQSK	10	TEGATKGASTTAGSTTGATTGANAVQSKDET
PF3D7_1312900	EIF4G	eukaryotic translation initation factor 4 gamma	0.403492	-0.633862	-0.23037	-0.547829	-0.719894	-0.22707	-0.233669	PF3D7_1312900	306	S	___1	NS(1)NVEEHLR	2	FDENMNNSNTMHSRNSNVEEHLRNNSIDMNN
PF3D7_0923400		conserved Plasmodium protein, unknown function	0.402857	2.96632	3.36918	3.00125	2.93139	3.35787	3.38049	PF3D7_0923400	107	S	___1	EYS(1)QDK	3	YDNNTYWEKKKYKEYSQDKKYNKEYYNKDSS
PF3D7_1466400	ApiAP2	AP2 domain transcription factor AP2-SP	0.402748	1.06225	1.465	1.03783	1.08668	1.52027	1.40973	PF3D7_1466400	554	T	___1	T(0.153)T(0.847)SNINNRK	2	HSLKGQMELSKRKKTTSNINNRKNDLLEDSV
PF3D7_1445400	CLK1	protein serine/threonine kinase-1	0.402564	-0.263653	0.138911	-0.24996	-0.277346	0.269361	0.008461	PF3D7_1445400	254	S	___1	NKS(0.262)IS(0.738)R	5	HNIYRYHNGNKNKSISRWEDNYTYKDIYQPS
PF3D7_1223400		phospholipid-transporting ATPase, putative	0.402247	0.711848	1.1141	0.617811	0.805885	1.33491	0.89328	PF3D7_1223400	1034	S	___1	NKKENNS(1)DNVK	7	NRKKKDVQKNKKENNSDNVKSSTQNKKKKHF
PF3D7_1330800		RNA-binding protein, putative	0.402182	1.63889	2.04107	1.73887	1.53892	1.99498	2.08717	PF3D7_1330800	26	S	___2	ADDS(1)NVDNK	4	SKDKKEELKDIKADDSNVDNKATESTAVDSE
PF3D7_1126800	SR-MG	RNA-binding protein, putative	0.402032	-0.168957	0.233075	-0.120699	-0.217215	0.18251	0.28364	PF3D7_1126800	750	S	___1	DMLSHNS(1)FEKNNLIQK	7	YDSPYYSPRDMLSHNSFEKNNLIQKKNEDNI
PF3D7_1307800		fork head domain protein, putative	0.401447	-0.649407	-0.24796	-0.586649	-0.712166	-0.26371	-0.23221	PF3D7_1307800	257	S	___2	T(0.45)S(0.499)KDNS(0.091)Y(0.201)Y(0.227)DS(0.532)K	10	SSEHTRTSKDNSYYDSKRKYRNITSEDEEMK
PF3D7_0730900	PTP4	EMP1-trafficking protein	0.401038	2.23983	2.64087	2.37058	2.10909	2.58623	2.69551	PF3D7_0730900	1091	S	___1	SMS(1)VANTK	3	NINSENKQNAHTRSMSVANTKSHVQQNVKTF
PF3D7_1359400	CELF1	CUGBP Elav-like family member 1	0.400982	-2.89446	-2.49348	-3.17782	-2.6111	-2.36645	-2.62051	PF3D7_1359400	135	S	___1	MAS(1)ISEADNAIR	3	KITNVHKSSAFVKMASISEADNAIRLLNNQK
PF3D7_1107800	ApiAP2	AP2 domain transcription factor, putative	0.400948	-0.211647	0.189301	-0.228729	-0.194565	0.118261	0.26034	PF3D7_1107800	286	S	___2	KDAT(0.003)S(0.019)GS(0.978)LLYKDDIIGS(0.999)DAY(0.001)NK	7	YDENNVIKKKDATSGSLLYKDDIIGSDAYNK
PF3D7_1107800	ApiAP2	AP2 domain transcription factor, putative	0.400948	-0.211647	0.189301	-0.228729	-0.194565	0.118261	0.26034	PF3D7_1107800	296	S	___2	KDATSGSLLYKDDIIGS(1)DAYNK	17	DATSGSLLYKDDIIGSDAYNKKHEKTLDFNE
PF3D7_1142100		conserved Plasmodium protein, unknown function	0.400798	1.82629	2.22709	1.95751	1.69506	2.24715	2.20702	PF3D7_1142100	2168	S	___1	FIPS(0.998)DS(0.002)QTKEDYNYDKYR	4	TNDYTNDNINNRFIPSDSQTKEDYNYDKYRK
PF3D7_0500800	MESA	mature parasite-infected erythrocyte surface antigen	0.400558	1.51225	1.91281	1.6215	1.40299	1.92321	1.9024	PF3D7_0500800	454	T	___1	NIET(1)DDEEET(1)LVVKDDAK	10	NFLCNKNIETDDEEETLVVKDDAKKKHKFLR
PF3D7_0922100		ubiquitin-like protein, putative	0.400307	-1.76024	-1.35993	-1.83093	-1.68954	-1.45908	-1.26078	PF3D7_0922100	1214	S	___2	SAS(0.001)HS(0.077)FS(0.922)DAT(0.023)S(0.853)S(0.125)HQEKQEK	11	SYKSKSASHSFSDATSSHQEKQEKKNNLHNE
PF3D7_0501400	FIRA	interspersed repeat antigen	0.400272	1.98346	2.38373	2.02751	1.93941	2.25371	2.51375	PF3D7_0501400	420	S	___2	KGS(1)EGDNIS(1)LS(0.944)S(0.055)LS(0.001)EETQEK	9	EEHIDEKKGSEGDNISLSSLSEETQEKSHTK
PF3D7_0730900	PTP4	EMP1-trafficking protein	0.400137	-3.60199	-3.20185	-3.51785	-3.68612	-3.17152	-3.23218	PF3D7_0730900	1144	S	___1	RAS(0.5)VS(0.5)EINENVEETK	5	PKIDRTKINTRRASVSEINENVEETKKDIPQ
PF3D7_1314700		pinin/SDK/MemA domain-containing protein, putative	0.400084	-0.272238	0.127846	-0.3162	-0.228275	0.10745	0.148241	PF3D7_1314700	497	S	___1	SYEGEENT(0.001)GKS(0.999)NEGEENTGK	11	ENTGKSYEGEENTGKSNEGEENTGKSYEDEE
PF3D7_1411200	ROM8	rhomboid protease ROM8	0.399978	-3.41165	-3.01167	-3.36261	-3.46068	-3.14628	-2.87706	PF3D7_1411200	212	S	___2	DDLNDDNENS(0.086)CS(0.638)S(0.638)FT(0.638)RR	12	KKTRDDLNDDNENSCSSFTRRGKYNKTKTIK
PF3D7_1411200	ROM8	rhomboid protease ROM8	0.399978	-3.41165	-3.01167	-3.36261	-3.46068	-3.14628	-2.87706	PF3D7_1411200	213	S	___2	DDLNDDNENS(0.086)CS(0.638)S(0.638)FT(0.638)RR	13	KTRDDLNDDNENSCSSFTRRGKYNKTKTIKK
PF3D7_1411200	ROM8	rhomboid protease ROM8	0.399978	-3.41165	-3.01167	-3.36261	-3.46068	-3.14628	-2.87706	PF3D7_1411200	215	T	___2	DDLNDDNENS(0.086)CS(0.638)S(0.638)FT(0.638)RR	15	RDDLNDDNENSCSSFTRRGKYNKTKTIKKSN
PF3D7_1022400	SRSF4	serine/arginine-rich splicing factor 4	0.399786	-1.37131	-0.97152	-1.44881	-1.2938	-1.01659	-0.926451	PF3D7_1022400	479	S	___1	TEENHDS(1)KS(1)VS(1)NDR	9	GSKKGAKTEENHDSKSVSNDRNKSDKSEEKE
PF3D7_1132400		conserved Plasmodium membrane protein, unknown function	0.399117	1.5117	1.91082	1.56119	1.46222	1.91028	1.91136	PF3D7_1132400	791	S	___1	KS(0.566)S(0.434)MDNIKDDITGK	2	YHVDDDNIYYKEIRKSSMDNIKDDITGKYNM
PF3D7_0731300	PfG174	Plasmodium exported protein (PHISTb), unknown function	0.398942	2.47542	2.87436	2.55004	2.40079	2.795	2.95372	PF3D7_0731300	86	T	___2	NVKDGNDS(0.115)S(0.846)S(0.04)EELDNT(0.884)NVPT(0.101)S(0.015)KPK	16	NVKDGNDSSSEELDNTNVPTSKPKKKLSAVF
PF3D7_0501400	FIRA	interspersed repeat antigen	0.398853	1.61478	2.01364	1.73575	1.49381	1.8508	2.17647	PF3D7_0501400	414	S	___3	KGS(1)EGDNIS(1)LS(0.944)S(0.055)LS(0.001)EETQEK	3	QEPVTVEEHIDEKKGSEGDNISLSSLSEETQ
PF3D7_0812500		RNA-binding protein, putative	0.398831	0.263028	0.66186	0.304581	0.221476	0.65745	0.666269	PF3D7_0812500	745	S	___1	DFKS(1)YREEK	4	NTYNNNDNYNNKDFKSYREEKNTNYHRTDDN
PF3D7_0905800		conserved Plasmodium protein, unknown function	0.398772	4.43694	4.83571	4.44044	4.43344	4.80027	4.87115	PF3D7_0905800	775	S	___1	YGNVS(1)PHINDPLINK	5	NLHTKQFQNEKYGNVSPHINDPLINKNNYER
PF3D7_0806100		conserved Plasmodium protein, unknown function	0.398503	-3.16507	-2.76656	-2.85028	-3.47986	-2.81411	-2.71902	PF3D7_0806100	470	S	___1	KDES(0.95)Y(0.004)IDS(0.029)Y(0.018)IDLIK	4	KAKKKKKKKKEKKDESYIDSYIDLIKNVKVF
PF3D7_0521000		conserved Plasmodium protein, unknown function	0.398447	1.19757	1.59602	1.2311	1.16405	1.5557	1.63634	PF3D7_0521000	81	S	___1	T(0.213)S(0.894)T(0.894)ES(1)EDDDVTK	5	NEKGFYLKKRKTSTESEDDDVTKNIQKKRKE
PF3D7_0501400	FIRA	interspersed repeat antigen	0.398314	1.55695	1.95526	1.67952	1.43438	1.7869	2.12362	PF3D7_0501400	422	S	___3	KGS(1)EGDNIS(1)LS(0.944)S(0.055)LS(0.001)EETQEK	11	HIDEKKGSEGDNISLSSLSEETQEKSHTKKK
PF3D7_0401800	PfD80	Plasmodium exported protein (PHISTb), unknown function	0.398108	1.47351	1.87162	1.45991	1.48711	1.76869	1.97455	PF3D7_0401800	138	S	___3	SAS(0.001)AAS(0.98)T(0.019)TR	6	STASAASTTRSASAASTTRSASAASTTRSAS
PF3D7_0932800	CSE1	importin alpha re-exporter, putative	0.397898	0.271507	0.669405	0.0212402	0.521774	1.13167	0.20714	PF3D7_0932800	736	S	___1	DALLTLS(0.001)S(0.999)DGMDITNK	8	LECKILTKDALLTLSSDGMDITNKSSGSILN
PF3D7_1219000	FRM2	formin 2	0.396882	2.67474	3.07162	2.81427	2.53522	2.98612	3.15713	PF3D7_1219000	1606	S	___1	HYCDHS(1)DIEKNK	6	TNVYESIVEKHYCDHSDIEKNKGQKIDIQYS
PF3D7_1407800	PM4	plasmepsin IV	0.396703	0.239548	0.63625	0.387041	0.0920544	0.671551	0.60095	PF3D7_1407800	4	T	___1	ALT(1)VKEEEFSNTLIK	3	____________MALTVKEEEFSNTLIKNAS
PF3D7_0904600		ubiquitin specific protease, putative	0.396568	0.274278	0.670846	0.36063	0.187925	0.651981	0.689711	PF3D7_0904600	1270	S	___1	SNNHENKNDVEDNMEMDET(0.003)NNNS(0.997)MDPQQR	23	NDVEDNMEMDETNNNSMDPQQRCNLISVFNK
PF3D7_0922100		ubiquitin-like protein, putative	0.396478	-2.95229	-2.55581	-3.29799	-2.60659	-2.68637	-2.42525	PF3D7_0922100	511	S	___2	KY(0.009)Y(0.066)DS(0.826)NS(0.316)S(0.339)IS(0.442)PNEDAY(0.002)VER	5	KIKITNKHKKKKYYDSNSSISPNEDAYVERI
PF3D7_0202000	KAHRP	knob-associated histidine-rich protein	0.395907	5.04806	5.44397	5.01606	5.08006	5.39493	5.49301	PF3D7_0202000	406	S	___1	HKDNEDAES(1)VKS(1)K	12	KSKKHKDNEDAESVKSKKHKSHDCEKKKSKK
PF3D7_1205500		zinc finger protein, putative	0.395798	0.152523	0.548321	0.168791	0.136255	0.553881	0.542761	PF3D7_1205500	1670	T	___1	KT(0.01)NVS(0.126)PT(0.864)NNIIECNSDLK	7	INNLNINNKKTNVSPTNNIIECNSDLKLENN
PF3D7_1202600	NEMF	conserved protein, unknown function	0.395738	-1.85374	-1.458	-1.75969	-1.9478	-1.36532	-1.55069	PF3D7_1202600	1889	S	___1	EGLNKS(0.998)GDDNS(0.002)YVEDIYGNNK	6	NYDNHNVNDKEGLNKSGDDNSYVEDIYGNNK
PF3D7_1022400	SRSF4	serine/arginine-rich splicing factor 4	0.395488	-1.93697	-1.54148	-2.05859	-1.81536	-1.55984	-1.52313	PF3D7_1022400	481	S	___1	TEENHDS(1)KS(1)VS(1)NDR	11	KKGAKTEENHDSKSVSNDRNKSDKSEEKEKP
PF3D7_1246600	BUD13	pre-mRNA-splicing factor CWC26, putative	0.395482	-2.00237	-1.60688	-2.12371	-1.88103	-1.55312	-1.66065	PF3D7_1246600	127	S	___2	RES(1)DS(1)DMS(1)ICR	3	SYDKKKKKKKSKKRESDSDMSICRNKHNDKS
PF3D7_1246600	BUD13	pre-mRNA-splicing factor CWC26, putative	0.395482	-2.00237	-1.60688	-2.12371	-1.88103	-1.55312	-1.66065	PF3D7_1246600	129	S	___2	RES(1)DS(1)DMS(1)ICR	5	DKKKKKKKSKKRESDSDMSICRNKHNDKSDS
PF3D7_0202000	KAHRP	knob-associated histidine-rich protein	0.395468	4.0243	4.41977	3.9991	4.0495	4.38183	4.4577	PF3D7_0202000	598	S	___2	GAS(0.991)T(0.009)TAGSTTGATTGANAVQSK	3	ATKEASTTEGATKGASTTAGSTTGATTGANA
PF3D7_1326700		conserved Apicomplexan protein, unknown function	0.394504	1.83258	2.22709	1.69557	1.96959	2.19694	2.25723	PF3D7_1326700	170	S	___3	T(0.005)DS(0.996)VVKS(0.999)DIS(1)LKNDLNR	7	IKEIDNHQKTDSVVKSDISLKNDLNRKSNTS
PF3D7_1326700		conserved Apicomplexan protein, unknown function	0.394504	1.83258	2.22709	1.69557	1.96959	2.19694	2.25723	PF3D7_1326700	173	S	___3	SDIS(1)LKNDLNR	4	IDNHQKTDSVVKSDISLKNDLNRKSNTSQKS
PF3D7_1326700		conserved Apicomplexan protein, unknown function	0.394504	1.83258	2.22709	1.69557	1.96959	2.19694	2.25723	PF3D7_1326700	166	S	___3	T(0.005)DS(0.996)VVKS(0.999)DIS(1)LKNDLNR	3	NEKNIKEIDNHQKTDSVVKSDISLKNDLNRK
PF3D7_0936800		Plasmodium exported protein (PHISTc), unknown function	0.394319	1.43031	1.82463	1.47637	1.38424	1.73672	1.91253	PF3D7_0936800	275	S	___1	GYLGEVES(1)ETIKKK	8	HSRGIFAKGYLGEVESETIKKKTEHHENVNE
PF3D7_1004400		RNA-binding protein, putative	0.394168	-1.16178	-0.767614	-1.23535	-1.08821	-0.812799	-0.722429	PF3D7_1004400	614	S	___3	VS(1)HRDGHMK	2	SMSMIDRDNTYDERVSHRDGHMKDDRDDDMC
PF3D7_1004400		RNA-binding protein, putative	0.394168	-1.16178	-0.767614	-1.23535	-1.08821	-0.812799	-0.722429	PF3D7_1004400	599	S	___3	S(1)MS(0.999)MIDRDNT(0.001)Y(0.001)DER	1	NKSEVDDSKYKKSTRSMSMIDRDNTYDERVS
PF3D7_1004400		RNA-binding protein, putative	0.394168	-1.16178	-0.767614	-1.23535	-1.08821	-0.812799	-0.722429	PF3D7_1004400	601	S	___3	S(1)MS(0.999)MIDRDNT(0.001)Y(0.001)DER	3	SEVDDSKYKKSTRSMSMIDRDNTYDERVSHR
PF3D7_1004400		RNA-binding protein, putative	0.394168	-1.16178	-0.767614	-1.23535	-1.08821	-0.812799	-0.722429	PF3D7_1004400	608	T	___3	DNT(1)YDER	3	YKKSTRSMSMIDRDNTYDERVSHRDGHMKDD
PF3D7_0305500		conserved Plasmodium protein, unknown function	0.393942	-2.01698	-1.62304	-2.19135	-1.84262	-1.59836	-1.64772	PF3D7_0305500	2184	S	___1	YNDVS(0.865)S(0.135)CGAR	5	HISQHTNNNIRYNDVSSCGARGHNINSNENV
PF3D7_0806800		V-type proton ATPase subunit a, putative	0.393137	1.69922	2.09236	1.70885	1.68959	2.0905	2.09422	PF3D7_0806800	274	S	___1	QHDTFS(1)DKLDGK	6	DTNNMYKNNKQHDTFSDKLDGKDKNDKKKKK
PF3D7_1359900		conserved Plasmodium membrane protein, unknown function	0.392673	0.743573	1.13625	0.812981	0.674166	1.10518	1.16731	PF3D7_1359900	1472	S	___1	NLNES(1)YGNFNTPTISPTNIK	5	RIIGTIGNKMRNLNESYGNFNTPTISPTNIK
PF3D7_0918900	gammaGCS	gamma-glutamylcysteine synthetase	0.392468	0.877607	1.27008	0.969931	0.785284	1.31718	1.22297	PF3D7_0918900	312	S	___2	DNT(1)PRS(0.998)CNDY(0.002)NNVNDSSNTQDIFISSLKK	6	DEIENKNKEKDNTPRSCNDYNNVNDSSNTQD
PF3D7_1149100.2-p1		Plasmodium exported protein, unknown function	0.392347	0.393038	0.785385	0.46134	0.324736	0.74202	0.828751	PF3D7_1149100.2-p1;PF3D7_1149100	416;417	S	___1	NS(0.533)T(0.478)NDS(0.903)IKT(0.086)PKK	6	EESLNKLSTKNSTNDSIKTPKKKSNNKNTKE
PF3D7_0730800.2-p1		Plasmodium exported protein, unknown function, unspecified product	0.392062	2.98082	3.37289	3.04024	2.92141	3.41451	3.33126	PF3D7_0730800.2-p1;PF3D7_0730800	124;124	S	___1	YVNEDGTTKPNAPTAQS(1)LTSIVK	17	VNEDGTTKPNAPTAQSLTSIVKGVMHDIKPQ
PF3D7_1467900		rab GTPase activator, putative	0.391052	0.118733	0.509786	0.088541	0.148926	0.549261	0.47031	PF3D7_1467900	1171	S	___1	ES(0.122)S(0.878)GGEDVKNDMNEK	3	EDNKENIVDNIMKESSGGEDVKNDMNEKNIT
PF3D7_1148700	GEXP12	Plasmodium exported protein (PHISTc), unknown function	0.390483	-1.53477	-1.14429	-1.53329	-1.53625	-1.18226	-1.10632	PF3D7_1148700	254	S	___1	T(0.015)ECNPKES(0.97)IKNES(0.015)IPK	8	NYKKINNKTECNPKESIKNESIPKECIPNEN
PF3D7_0624600	ISWI	SNF2 helicase, putative	0.389897	-1.3062	-0.916305	-1.51101	-1.10139	-0.794559	-1.03805	PF3D7_0624600	2101	S	___1	LTHFLS(0.004)NQPLT(0.788)IS(0.625)S(0.483)DY(0.036)S(0.063)DT(0.002)KDIIEIR	13	KAKLTHFLSNQPLTISSDYSDTKDIIEIRSD
PF3D7_0404300		conserved Plasmodium protein, unknown function	0.389883	-2.34611	-1.95623	-2.15147	-2.54075	-1.81034	-2.10212	PF3D7_0404300	130	T	___1	VT(1)S(1)DENVR	2	KEKKRKKELKKNKKVTSDENVRNAEDEEEEE
PF3D7_1121100		conserved Plasmodium protein, unknown function	0.389862	-2.44315	-2.05329	-2.50371	-2.3826	-2.26428	-1.8423	PF3D7_1121100	256	S	___1	TFNDNIS(1)NENNNFGYSK	7	PNKNNNLDKTFNDNISNENNNFGYSKNEESK
PF3D7_1343300		conserved Plasmodium protein, unknown function	0.389852	-0.742307	-0.352455	-0.635439	-0.849174	-0.25771	-0.447201	PF3D7_1343300	432	S	___2	VNS(0.375)S(0.418)S(0.445)EKS(0.761)DPCDLDSIDYEVNPVLK	8	NNIMKKRKVNSSSEKSDPCDLDSIDYEVNPV
PF3D7_1140700		conserved Plasmodium protein, unknown function	0.389332	0.604083	0.993415	0.622311	0.585855	0.77364	1.21319	PF3D7_1140700	969	S	___1	S(0.857)LS(0.143)DFIDEDK	1	NNNSNSNIRNMIHNKSLSDFIDEDKIFKQKS
PF3D7_1139300	ApiAP2	AP2 domain transcription factor, putative	0.389052	-0.333492	0.0555601	-0.29092	-0.376064	-0.0919189	0.203039	PF3D7_1139300	2448	S	___1	LSIES(1)IEQIK	5	VIRRGVKEAYKLSIESIEQIKRQTQTNNFNN
PF3D7_1328500		alpha/beta-hydrolase, putative	0.388978	3.00676	3.39574	3.07637	2.93715	3.4043	3.38718	PF3D7_1328500	243	S	___1	GKS(1)IEVK	3	EDINNDIEKTHERGKSIEVKSEVNIPKYTST
PF3D7_1344100		krox-like protein, putative	0.388828	0.0741119	0.46294	0.21958	-0.0713558	0.45569	0.47019	PF3D7_1344100	225	S	___2	RNS(1)FDLVY(0.215)S(0.078)DS(0.701)NVNT(0.007)INK	11	SLDKKRNSFDLVYSDSNVNTINKNNKKERNY
PF3D7_0401800	PfD80	Plasmodium exported protein (PHISTb), unknown function	0.388522	-1.81766	-1.42914	-1.93187	-1.70345	-1.42342	-1.43485	PF3D7_0401800	316	S	___2	EAES(1)VDDNNKEGNES(0.98)DNIY(0.004)CMLCS(0.006)S(0.006)NT(0.005)R	4	GSNVDITEEEEKEAESVDDNNKEGNESDNIY
PF3D7_0401800	PfD80	Plasmodium exported protein (PHISTb), unknown function	0.388522	-1.81766	-1.42914	-1.93187	-1.70345	-1.42342	-1.43485	PF3D7_0401800	327	S	___2	EAESVDDNNKEGNES(0.999)DNIY(0.001)CMLCSSNTR	15	KEAESVDDNNKEGNESDNIYCMLCSSNTRGF
PF3D7_0922100		ubiquitin-like protein, putative	0.388278	0.201397	0.589675	0.29719	0.105604	0.58555	0.5938	PF3D7_0922100	1197	T	___1	KSSNENNLFKDT(0.609)NS(0.389)Y(0.002)K	12	HHKKKSSNENNLFKDTNSYKSKSASHSFSDA
PF3D7_1126800	SR-MG	RNA-binding protein, putative	0.387972	-0.698042	-0.31007	-0.556709	-0.839375	-0.25079	-0.36935	PF3D7_1126800	88	S	___1	RKS(1)PDTMK	3	DGNEIRIIIAQNRRKSPDTMKFYHNEYLYNY
PF3D7_0401800	PfD80	Plasmodium exported protein (PHISTb), unknown function	0.387907	1.81363	2.20154	1.85585	1.77142	2.08239	2.32069	PF3D7_0401800	174	S	___3	SAST(0.002)AS(0.998)T(0.999)AS(0.999)AAS(0.001)AASTTR	6	RSASTASTARSASTASTASAASAASTTRSAS
PF3D7_1149600		DnaJ protein, putative	0.387672	3.59616	3.98384	3.61349	3.57883	3.94267	4.025	PF3D7_1149600	180	S	___1	NDS(0.999)NT(0.001)NIQEK	3	SNVSSTITKSLERNDSNTNIQEKVPKESKNT
PF3D7_1222300	GRP94	endoplasmin, putative	0.387517	-0.0328522	0.354665	0.0757809	-0.141485	0.34454	0.36479	PF3D7_1222300	544	S	___1	S(0.415)IS(0.583)LDT(0.002)YIEHMKPDQK	3	AKLLLFKTMQYPKSISLDTYIEHMKPDQKFI
PF3D7_1004300		E3 ubiquitin-protein ligase, putative	0.387463	3.42867	3.81614	3.48522	3.37213	3.88193	3.75034	PF3D7_1004300	984	S	___1	SRDS(1)DNEKEGSR	4	SNASNSNNSTRRSRDSDNEKEGSRKKSKNYK
PF3D7_1022000		RNA-binding protein, putative	0.387418	1.18843	1.57585	1.0642	1.31266	1.61089	1.54081	PF3D7_1022000	893	S	___1	SNYS(0.994)DS(0.005)K	4	CDNNNNNNNNSKSNYSDSKKVTPNSNSNSNS
PF3D7_1126500		conserved Plasmodium protein, unknown function	0.387202	-1.79495	-1.40775	-1.86933	-1.72058	-1.10409	-1.71141	PF3D7_1126500	9	S	___1	LYVS(1)KECMPLK	4	_______MEGSKLYVSKECMPLKILRDTKAN
PF3D7_0817300		conserved Plasmodium protein, unknown function	0.386903	1.28796	1.67486	1.39579	1.18012	1.64253	1.70719	PF3D7_0817300	127	S	___2	SQDENFLHAEVS(1)S(1)NEYK	12	CEFKSQDENFLHAEVSSNEYKDANNDSSDEE
PF3D7_0817300		conserved Plasmodium protein, unknown function	0.386903	1.28796	1.67486	1.39579	1.18012	1.64253	1.70719	PF3D7_0817300	128	S	___2	SQDENFLHAEVS(1)S(1)NEYK	13	EFKSQDENFLHAEVSSNEYKDANNDSSDEED
PF3D7_1227200	K1	potassium channel	0.386817	1.10274	1.48956	1.09912	1.10636	1.61298	1.36613	PF3D7_1227200	295	S	___1	NDTGGNS(1)FKR	7	EKRIVVFPRNDTGGNSFKRESIYIDDCNMWM
PF3D7_0215400		conserved Plasmodium protein, unknown function	0.386748	-1.18693	-0.800179	-1.06139	-1.31247	-0.88019	-0.720169	PF3D7_0215400	283	S	___1	RVS(1)DASDIYAR	3	VDINQTKDYKEKKRVSDASDIYARTDSVNSN
PF3D7_1466900		rhoptry protein, putative	0.386707	0.521313	0.90802	0.47562	0.567005	0.930941	0.885099	PF3D7_1466900	1216	S	___1	NNS(1)NNLNSK	3	NNNNNNNISSSSRNNSNNLNSKNEILGSQNS
PF3D7_1004400		RNA-binding protein, putative	0.386493	-2.3349	-1.9484	-2.34253	-2.32726	-1.89745	-1.99936	PF3D7_1004400	614	S	___2	VS(1)HRDGHMK	2	SMSMIDRDNTYDERVSHRDGHMKDDRDDDMC
PF3D7_0113200		Plasmodium exported protein, unknown function	0.386247	1.97896	2.3652	1.97656	1.98136	2.33309	2.39732	PF3D7_0113200	365	S	___1	SENENDDES(1)DYDDDEELQGHSVVYNDK	9	RTNNQHRSENENDDESDYDDDEELQGHSVVY
PF3D7_1108600	ERC	endoplasmic reticulum-resident calcium binding protein	0.385643	0.951367	1.33701	1.07225	0.830484	1.24115	1.43287	PF3D7_1108600	322	T	___1	AFEDDDMDADNT(1)EDDKDEADDASQQK	12	ARSRAFEDDDMDADNTEDDKDEADDASQQKS
PF3D7_1134600		zinc finger protein, putative	0.385608	-0.747822	-0.362214	-0.691299	-0.804344	-0.341429	-0.382999	PF3D7_1134600	922	S	___1	GEEGEIS(0.546)S(0.454)PKER	7	YNILINNVRGEEGEISSPKERNIPKKDIEII
PF3D7_0603600		conserved Plasmodium protein, unknown function	0.385113	1.15225	1.53736	1.17687	1.12762	1.49776	1.57696	PF3D7_0603600	785	S	___1	KIHILS(1)EDDNKR	6	SNNMISNKMKKIHILSEDDNKRNINVDKRKG
PF3D7_0729100		conserved Plasmodium protein, unknown function	0.384898	1.32574	1.71064	1.27744	1.37404	1.65783	1.76345	PF3D7_0729100	1626	S	___1	NGPMDGVS(1)FDDDKYK	8	EWKFNDIRNGPMDGVSFDDDKYKNRKYYHKE
PF3D7_0923400		conserved Plasmodium protein, unknown function	0.384843	1.90547	2.29031	2.02297	1.78797	2.34236	2.23826	PF3D7_0923400	184	S	___1	YKLS(1)EK	4	MERGDGYKNSRKYKLSEKKYSPYDNERMKKY
PF3D7_0907200		GTPase-activating protein, putative	0.384777	-2.49517	-2.1104	-2.53566	-2.45469	-2.09214	-2.12865	PF3D7_0907200	2	S	___1	S(0.998)ELKPLELEY(0.002)LDK	1	______________MSELKPLELEYLDKNVK
PF3D7_1409900	CDS	cytidine diphosphate-diacylglycerol synthase	0.384728	-0.229692	0.155036	-0.15823	-0.301155	0.115461	0.194611	PF3D7_1409900	52	S	___2	S(0.602)KS(0.699)KS(0.617)LDDS(0.081)NGGIENMDK	1	ESSTVDEKGDIIKRRSKSKSLDDSNGGIENM
PF3D7_1409900	CDS	cytidine diphosphate-diacylglycerol synthase	0.384728	-0.229692	0.155036	-0.15823	-0.301155	0.115461	0.194611	PF3D7_1409900	54	S	___2	S(0.975)KS(0.025)LDDSNGGIENMDKVK	1	STVDEKGDIIKRRSKSKSLDDSNGGIENMDK
PF3D7_1409900	CDS	cytidine diphosphate-diacylglycerol synthase	0.384728	-0.229692	0.155036	-0.15823	-0.301155	0.115461	0.194611	PF3D7_1409900	56	S	___2	S(0.602)KS(0.699)KS(0.617)LDDS(0.081)NGGIENMDK	5	VDEKGDIIKRRSKSKSLDDSNGGIENMDKVK
PF3D7_0520700		CDC73 domain-containing protein, putative	0.384652	-0.498477	-0.113825	-0.406399	-0.590555	-0.157169	-0.0704803	PF3D7_0520700	616	S	___1	ISYENEGHKS(1)DNEFDDNDDDDNMFEICK	10	CLAPQKISYENEGHKSDNEFDDNDDDDNMFE
PF3D7_0501400	FIRA	interspersed repeat antigen	0.384624	0.819512	1.20414	0.87849	0.760534	1.13519	1.27308	PF3D7_0501400	677	S	___2	AS(1)EGDNISLSSLSEETQEK	2	QESIATQEHADEKKASEGDNISLSSLSEETQ
PF3D7_0730900	PTP4	EMP1-trafficking protein	0.384573	2.21377	2.59835	2.33002	2.09752	2.60267	2.59402	PF3D7_0730900	2098	S	___1	GVNVQS(0.058)S(0.914)NT(0.029)NKHMPR	7	LGKHKHHEKGVNVQSSNTNKHMPRKMLR___
PF3D7_0110500	BDP3	bromodomain protein, putative	0.384542	3.38305	3.76759	3.47993	3.28617	3.86686	3.66832	PF3D7_0110500	1626	S	___1	NLHEFIDDKS(0.996)T(0.004)EGNDEKR	10	YKNIFRNLHEFIDDKSTEGNDEKRSSHQNGT
PF3D7_1412300	NTF2	nuclear transport factor 2, putative	0.383862	-0.474273	-0.0904102	-0.35146	-0.597086	-0.16371	-0.0171108	PF3D7_1412300	51	S	___1	GT(0.009)S(0.991)QIIER	3	DISMMSFENDQCRGTSQIIERLNKLPPTVVH
PF3D7_0305300		conserved Plasmodium membrane protein, unknown function	0.382903	1.21309	1.59599	1.18785	1.23833	1.60603	1.58595	PF3D7_0305300	10	S	___1	MDVYKEENS(1)DLLNHQEEEISR	9	______MMDVYKEENSDLLNHQEEEISRNSN
PF3D7_0516200	RPS11	40S ribosomal protein S11	0.382803	-2.42953	-2.04672	-2.43785	-2.42121	-2.13403	-1.95942	PF3D7_0516200	139	S	___1	IEDVT(0.001)PIPT(0.192)DS(0.656)T(0.152)R	11	LKIGRIEDVTPIPTDSTRKKSGRRGRRL___
PF3D7_1349500		conserved Plasmodium protein, unknown function	0.382563	-2.99812	-2.61555	-3.06625	-2.92999	-2.7306	-2.50051	PF3D7_1349500	2011	S	___1	GLYEEES(0.758)S(0.166)Y(0.067)EDS(0.008)R	7	KEIHFKMLKGLYEEESSYEDSRNSYYFLFGS
PF3D7_1447900	MDR2	multidrug resistance protein 2	0.382402	1.4739	1.8563	1.55622	1.39157	1.92617	1.78643	PF3D7_1447900	269	S	___1	S(0.928)S(0.072)NFAYLNFFHK	1	NMDYNDIHNFQKKKKSSNFAYLNFFHKESKD
PF3D7_1307800		fork head domain protein, putative	0.382373	3.99385	4.37622	4.11505	3.87264	4.40314	4.3493	PF3D7_1307800	297	S	___1	YS(0.001)S(0.999)DVENDK	3	RKKSKSSKILVDKYSSDVENDKKGVEEKYKD
PF3D7_1343300		conserved Plasmodium protein, unknown function	0.382318	3.09638	3.4787	3.16968	3.02308	3.47568	3.48172	PF3D7_1343300	719	T	___1	T(0.998)PQES(0.002)NADDFIVIQDSPIK	1	SVTLEENKVLAHLARTPQESNADDFIVIQDS
PF3D7_1227200	K1	potassium channel	0.382303	-1.03699	-0.654684	-0.93746	-1.13651	-0.491419	-0.817949	PF3D7_1227200	347	S	___1	DS(0.038)AS(0.962)LDNIQIFLGHR	4	INMNKDDDLMMKDSASLDNIQIFLGHRSSKF
PF3D7_1441300		serine/threonine protein kinase, putative	0.382153	2.66116	3.04332	2.7776	2.54473	3.0183	3.06833	PF3D7_1441300	1540	S	___3	KY(0.022)S(0.993)S(0.993)LY(0.992)GKNEK	3	IETSNYFNKEHIKKYSSLYGKNEKKNDIINI
PF3D7_1441300		serine/threonine protein kinase, putative	0.382153	2.66116	3.04332	2.7776	2.54473	3.0183	3.06833	PF3D7_1441300	1541	S	___3	KY(0.022)S(0.993)S(0.993)LY(0.992)GKNEK	4	ETSNYFNKEHIKKYSSLYGKNEKKNDIINIR
PF3D7_1441300		serine/threonine protein kinase, putative	0.382153	2.66116	3.04332	2.7776	2.54473	3.0183	3.06833	PF3D7_1441300	1543	Y	___3	KY(0.127)S(0.895)S(0.982)LY(0.996)GKNEK	6	SNYFNKEHIKKYSSLYGKNEKKNDIINIRNF
PF3D7_1466800		conserved Plasmodium protein, unknown function	0.381797	-3.06451	-2.68271	-3.16794	-2.96107	-2.61448	-2.75094	PF3D7_1466800	622	S	___1	NDAY(0.004)KY(0.063)S(0.968)T(0.971)DS(0.994)DDIERR	7	NSDLYNSMKNDAYKYSTDSDDIERRLTKGIE
PF3D7_1110900		ES2 protein, putative	0.381592	2.50721	2.8888	2.54628	2.46815	2.90494	2.87267	PF3D7_1110900	441	S	___1	GVDQS(1)PIITWGK	5	YVNTPLIQAGKGVDQSPIITWGKIICTPKLV
PF3D7_1416100	SEY1	protein SEY1, putative	0.381537	-2.20355	-1.82201	-2.23766	-2.16944	-1.9175	-1.72652	PF3D7_1416100	89	T	___1	GLWLSYDKFDDET(0.523)NNS(0.447)S(0.015)S(0.015)FFK	13	TTKGLWLSYDKFDDETNNSSSFFKLKKKNKP
PF3D7_0922100		ubiquitin-like protein, putative	0.381107	0.382143	0.76325	0.596251	0.168036	0.735931	0.790569	PF3D7_0922100	1213	T	___2	SASHS(0.075)FS(0.925)DAT(0.577)S(0.385)S(0.038)HQEKQEK	10	NSYKSKSASHSFSDATSSHQEKQEKKNNLHN
PF3D7_1478600	PTP3	EMP1-trafficking protein;Plasmodium exported protein (hyp17), unknown function, pseudogene	0.380998	1.88129	2.26229	1.84322	1.91936	2.22941	2.29517	PF3D7_1478600;PF3D7_1477000	1031;776	S	___1	GIDDEES(0.162)S(0.838)NKGKNENK	8	KIAKTVLKGIDDEESSNKGKNENKKKKKKDK
PF3D7_0401800	PfD80	Plasmodium exported protein (PHISTb), unknown function	0.380758	1.20087	1.58163	1.27885	1.12289	1.42661	1.73665	PF3D7_0401800	180	S	___1	SAS(0.002)T(0.002)AS(0.994)T(0.901)AS(0.101)AAS(1)AASTTR	12	STARSASTASTASAASAASTTRSASAASTTR
PF3D7_0922100		ubiquitin-like protein, putative	0.380708	0.680943	1.06165	0.842291	0.519594	1.02091	1.10239	PF3D7_0922100	1210	S	___2	SASHS(0.009)FS(0.991)DATSSHQEKQEK	7	KDTNSYKSKSASHSFSDATSSHQEKQEKKNN
PF3D7_0729300	NMD3	60S ribosomal export protein NMD3, putative	0.380423	0.330832	0.711255	0.24872	0.412945	0.87499	0.54752	PF3D7_0729300	21	S	___1	MKS(1)PGK	3	DDELIIEGEHNDKMKSPGKSLIPCIKEKFNE
PF3D7_1361800	GAC	glideosome-associated connector	0.380198	-3.44034	-3.06014	-3.34325	-3.53744	-2.8889	-3.23139	PF3D7_1361800	1399	S	___1	KY(0.007)NGS(0.988)MGNLIDQT(0.005)ITVMNLNR	5	NDEEGSKLLYKKYNGSMGNLIDQTITVMNLN
PF3D7_1447900	MDR2	multidrug resistance protein 2	0.379968	-0.162592	0.217376	0.00518036	-0.330364	0.346621	0.088131	PF3D7_1447900	210	S	___1	SDENSGLLGT(0.017)DS(0.114)NS(0.756)T(0.114)IMNNEYLNLDYK	14	YKSDENSGLLGTDSNSTIMNNEYLNLDYKNL
PF3D7_1330800		RNA-binding protein, putative	0.379922	2.29323	2.67315	2.32887	2.25759	2.63229	2.71401	PF3D7_1330800	40	S	___2	ATES(0.966)T(0.034)AVDS(1)EAK	9	DSNVDNKATESTAVDSEAKMEISSKVSEKKK
PF3D7_1301400	HYP12	Plasmodium exported protein (hyp12), unknown function	0.379903	-0.388167	-0.00826454	-0.28545	-0.490885	-0.15633	0.139801	PF3D7_1301400	212	S	___1	KNY(0.008)ADS(0.992)IIDNMDLTENVK	6	KTFKNLNAAKKNYADSIIDNMDLTENVKNIF
PF3D7_1321700	SF1	splicing factor 1	0.379678	0.109503	0.489181	0.12417	0.0948353	0.518511	0.45985	PF3D7_1321700	29	S	___2	EDKINGS(0.667)S(0.667)S(0.667)NKDELIENK	9	FEIKNSKEDKINGSSSNKDELIENKELKNDN
PF3D7_0523900		conserved Plasmodium membrane protein, unknown function	0.379587	-0.239772	0.139815	-0.274439	-0.205105	0.14448	0.135151	PF3D7_0523900	181	S	___2	T(0.803)IS(0.013)AS(0.794)S(0.39)NNGNK	5	CNEDHHDHHNRTISASSNNGNKYYMNYDKNE
PF3D7_1140700		conserved Plasmodium protein, unknown function	0.379573	-1.1629	-0.783324	-1.10008	-1.22572	-0.845089	-0.72156	PF3D7_1140700	1610	S	___2	SEQDHINDDDNNINS(0.999)Y(0.001)DDESDVNFNNKK	15	RSEQDHINDDDNNINSYDDESDVNFNNKKND
PF3D7_1140700		conserved Plasmodium protein, unknown function	0.379573	-1.1629	-0.783324	-1.10008	-1.22572	-0.845089	-0.72156	PF3D7_1140700	1615	S	___2	SEQDHINDDDNNINS(0.962)Y(0.038)DDES(1)DVNFNNKK	20	HINDDDNNINSYDDESDVNFNNKKNDYKGKR
PF3D7_1223100	PKAr	cAMP-dependent protein kinase regulatory subunit	0.379277	-0.223192	0.156085	-0.25074	-0.195644	0.15008	0.16209	PF3D7_1223100	81	T	___1	T(0.5)DS(0.5)EILDGLDYSEMSK	1	SLSKKPSKTKIPITKTDSEILDGLDYSEMSK
PF3D7_0731300	PfG174	Plasmodium exported protein (PHISTb), unknown function	0.379273	4.93256	5.31183	5.02474	4.84037	5.2273	5.39636	PF3D7_0731300	79	S	___2	NVKDGNDS(0.878)S(0.899)S(0.22)EELDNT(0.001)NVPTSKPK	9	NYSEVMKNVKDGNDSSSEELDNTNVPTSKPK
PF3D7_0915400	PFK9	ATP-dependent 6-phosphofructokinase	0.379217	-1.98046	-1.60124	-1.99559	-1.96532	-1.59436	-1.60812	PF3D7_0915400	749	S	___2	S(0.507)NT(0.507)S(0.507)DVLS(0.185)S(0.185)EPVNQGFY(0.11)EQHASSYK	1	YNVNGDGMNTLNCQKSNTSDVLSSEPVNQGF
PF3D7_0915400	PFK9	ATP-dependent 6-phosphofructokinase	0.379217	-1.98046	-1.60124	-1.99559	-1.96532	-1.59436	-1.60812	PF3D7_0915400	752	S	___2	S(0.005)NT(0.132)S(0.849)DVLS(0.013)SEPVNQGFYEQHASSYK	4	NGDGMNTLNCQKSNTSDVLSSEPVNQGFYEQ
PF3D7_0915400	PFK9	ATP-dependent 6-phosphofructokinase	0.379217	-1.98046	-1.60124	-1.99559	-1.96532	-1.59436	-1.60812	PF3D7_0915400	751	T	___2	S(0.143)NT(0.71)S(0.143)DVLS(0.002)S(0.002)EPVNQGFYEQHASSYK	3	VNGDGMNTLNCQKSNTSDVLSSEPVNQGFYE
PF3D7_1149000	Pf332	antigen 332, DBL-like protein	0.379052	-0.359032	0.0200205	-0.353039	-0.365025	-0.0731392	0.11318	PF3D7_1149000	148	S	___1	S(0.002)QCEERS(0.998)RDDTEDQFLR	7	RENGLDVCKSQCEERSRDDTEDQFLRFFAEW
PF3D7_0529800		conserved Plasmodium protein, unknown function	0.378757	0.0774136	0.45617	0.0759315	0.0788956	0.49543	0.41691	PF3D7_0529800	1366	S	___2	VENKINT(0.965)DDDLS(0.745)NS(0.29)K	12	NKSKVENKINTDDDLSNSKKSKNEKADKNDY
PF3D7_0529800		conserved Plasmodium protein, unknown function	0.378757	0.0774136	0.45617	0.0759315	0.0788956	0.49543	0.41691	PF3D7_0529800	1368	S	___2	INT(0.305)DDDLS(0.695)NS(1)KK	10	SKVENKINTDDDLSNSKKSKNEKADKNDYYD
PF3D7_1149000	Pf332	antigen 332, DBL-like protein	0.378707	-1.16027	-0.781565	-1.05088	-1.26966	-0.67045	-0.892679	PF3D7_1149000	3068	T	___1	EGS(0.011)AT(0.988)EEIVQDGSGTNDFVGK	5	DETNVEEVLEKEGSATEEIVQDGSGTNDFVG
PF3D7_1123100	CDPK7	calcium-dependent protein kinase 7	0.378622	1.80994	2.18857	1.86732	1.75257	2.25656	2.12057	PF3D7_1123100	1447	S	___1	S(1)QDGIEADVIKQGELNNEK	1	IFHNKVDEKRGSFSKSQDGIEADVIKQGELN
PF3D7_1030300		conserved Plasmodium protein, unknown function	0.378617	-0.622447	-0.24383	-0.555229	-0.689665	-0.32148	-0.16618	PF3D7_1030300	462	S	___1	LNSTNGNIS(0.998)DNT(0.002)IATMHIDGNYK	9	SSNYYMKLNSTNGNISDNTIATMHIDGNYKY
PF3D7_0302800		conserved Plasmodium protein, unknown function	0.378592	0.518888	0.89748	0.655611	0.382164	0.99543	0.79953	PF3D7_0302800	386	S	___1	NMPKS(1)DNDKR	5	KNDFSYNKKNKNMPKSDNDKRNNNNNNSSFN
PF3D7_1022400	SRSF4	serine/arginine-rich splicing factor 4	0.378442	-0.508177	-0.129735	-0.468319	-0.548035	-0.13405	-0.12542	PF3D7_1022400	354	S	___1	S(0.553)LS(0.447)EDRSNSR	1	SRRRTVSEDRSERRRSLSEDRSNSRKRNASS
PF3D7_1429600	GEXP03	conserved Plasmodium protein, unknown function	0.378338	0.182498	0.560836	0.18758	0.177416	0.615831	0.50584	PF3D7_1429600	187	T	___1	NYNDMSTNNDGT(1)PRS(1)AAS(1)EECVHFK	12	TFLKNYNDMSTNNDGTPRSAASEECVHFKEK
PF3D7_1202600	NEMF	conserved protein, unknown function	0.378268	-3.34812	-2.96985	-3.2694	-3.42684	-3.22152	-2.71818	PF3D7_1202600	2082	S	___1	LT(0.051)NS(0.949)PNEGDNLSFAIPMCAPYSAIQTHK	4	DDMDIKLNEIHKLTNSPNEGDNLSFAIPMCA
PF3D7_0319700	ABCI3	ABC transporter I family member 1, putative	0.378072	1.2488	1.62687	1.2783	1.2193	1.63455	1.61919	PF3D7_0319700	1524	T	___1	DDTELT(1)DIEENISSK	6	NNNNSFYNMRDDTELTDIEENISSKKKKNKF
PF3D7_0801800		mannose-6-phosphate isomerase, putative	0.377583	5.58651	5.9641	5.61802	5.555	6.01517	5.91302	PF3D7_0801800	225	S	___1	RYS(1)DIEFASLNNDSTK	3	TKGSTLGGENDLKRYSDIEFASLNNDSTKEK
PF3D7_0916700	HoMu	RNA-binding protein musashi, putative	0.377502	0.239613	0.617115	0.33305	0.146175	0.517811	0.716419	PF3D7_0916700	82	S	___2	GDEEEHDEKS(1)LGEDNK	10	SNISIKGDEEEHDEKSLGEDNKSVKDDESEA
PF3D7_0916700	HoMu	RNA-binding protein musashi, putative	0.377502	0.239613	0.617115	0.33305	0.146175	0.517811	0.716419	PF3D7_0916700	89	S	___2	SLGEDNKS(1)VKDDESEAEK	8	DEEEHDEKSLGEDNKSVKDDESEAEKLRRLI
PF3D7_1105400	RPS4	40S ribosomal protein S4, putative	0.377342	-0.696777	-0.319435	-0.507109	-0.886446	-0.37624	-0.26263	PF3D7_1105400	223	S	___1	LS(1)NVFVIGDNTKPYISLPR	2	IHVKDSRNKVFATRLSNVFVIGDNTKPYISL
PF3D7_1442900	ARFGEF	protein transport protein SEC7, putative	0.377172	-2.33732	-1.96015	-2.40284	-2.2718	-2.02754	-1.89276	PF3D7_1442900	1125	S	___3	NIS(0.999)DDHS(0.001)VLNNNS(1)K	3	QKKNNKNSSNIHKNISDDHSVLNNNSKNSVA
PF3D7_1442900	ARFGEF	protein transport protein SEC7, putative	0.377172	-2.33732	-1.96015	-2.40284	-2.2718	-2.02754	-1.89276	PF3D7_1442900	1129	S	___3	NIS(0.846)DDHS(0.993)VLNNNS(0.283)KNS(0.876)VAHY(0.003)ER	7	NKNSSNIHKNISDDHSVLNNNSKNSVAHYER
PF3D7_1442900	ARFGEF	protein transport protein SEC7, putative	0.377172	-2.33732	-1.96015	-2.40284	-2.2718	-2.02754	-1.89276	PF3D7_1442900	1138	S	___3	NS(1)VAHYER	2	NISDDHSVLNNNSKNSVAHYERNDEGKKIDK
PF3D7_0603400	TEX1	trophozoite exported protein 1	0.377028	3.18241	3.55943	3.24617	3.11864	3.57098	3.54789	PF3D7_0603400	804	S	___1	DNSFNEES(0.003)KS(0.997)EEGKIQLR	10	SGIHIKDNSFNEESKSEEGKIQLRDIQNDND
PF3D7_1206800		conserved Plasmodium protein, unknown function	0.376872	3.86473	4.2416	3.95805	3.77142	4.32806	4.15515	PF3D7_1206800	410	S	___1	YCDES(1)DDEDIYTDNIIFSQIHGLK	5	IQLKLDKQFNRYCDESDDEDIYTDNIIFSQI
PF3D7_1361800	GAC	glideosome-associated connector	0.376753	-0.998853	-0.6221	-1.59782	-0.399885	-0.32604	-0.918159	PF3D7_1361800	604	S	___1	IES(1)LKNILESK	3	AYKTLAAISGLSRIESLKNILESKGADTSIF
PF3D7_0913300		conserved Plasmodium protein, unknown function	0.376383	-1.30765	-0.931265	-1.19371	-1.42159	-1.02994	-0.83259	PF3D7_0913300	323	S	___1	CMDTDPCDDIS(0.774)S(0.184)S(0.042)ENIDNKEISSQQELCSFR	11	LDINRCMDTDPCDDISSSENIDNKEISSQQE
PF3D7_0731300	PfG174	Plasmodium exported protein (PHISTb), unknown function	0.376363	4.65349	5.02986	4.75007	4.55692	4.94535	5.11436	PF3D7_0731300	78	S	___2	NVKDGNDS(0.995)S(0.868)S(0.136)EELDNTNVPTSKPK	8	SNYSEVMKNVKDGNDSSSEELDNTNVPTSKP
PF3D7_0306800	CCT2	T-complex protein 1 subunit beta	0.376297	-1.32408	-0.94778	-1.41785	-1.2303	-0.7938	-1.10176	PF3D7_0306800	262	S	___1	VNVHS(1)FEDVQDLENEER	5	DTDKIKIYGTKVNVHSFEDVQDLENEERLKM
PF3D7_1365000		conserved Plasmodium protein, unknown function	0.376244	-0.905448	-0.529204	-0.9622	-0.848696	-0.522839	-0.53557	PF3D7_1365000	22	T	___1	NKNGDT(1)DIDNDTR	6	FNKNKENKNRNKNGDTDIDNDTRNNKSYKEN
PF3D7_1478600	PTP3	EMP1-trafficking protein	0.376158	-0.879772	-0.503614	-0.71784	-1.0417	-0.626019	-0.38121	PF3D7_1478600	444	S	___1	QGANPFIENDVS(1)DKKDNLQDSNK	12	KQIKQGANPFIENDVSDKKDNLQDSNKGLNV
PF3D7_1466400	ApiAP2	AP2 domain transcription factor AP2-SP	0.376148	-2.02033	-1.64418	-2.11189	-1.92878	-1.63371	-1.65466	PF3D7_1466400	813	S	___1	SNSYDNS(0.355)ES(0.645)	9	MNLNGNKSNSYDNSES_______________
PF3D7_1139300	ApiAP2	AP2 domain transcription factor, putative	0.375989	0.233242	0.609231	0.23543	0.231054	0.563341	0.655121	PF3D7_1139300	1777	T	___1	NDDDEDDGNNT(1)DNS(1)KILR	11	SQYHKNDDDEDDGNNTDNSKILRSFDKCSNE
PF3D7_1445700		conserved Plasmodium protein, unknown function	0.375916	0.395708	0.771625	0.415001	0.376415	0.78249	0.760759	PF3D7_1445700	24	S	___1	FSVFDS(1)DDNS(1)EEEIENK	10	VHTTNKFSVFDSDDNSEEEIENKDLNESPKN
PF3D7_0614300	MFR1	major facilitator superfamily-related transporter, putative	0.375712	-0.682097	-0.306385	-0.89867	-0.465525	-0.0615597	-0.55121	PF3D7_0614300	467	S	___1	KS(1)NMVAAIYEEDAVFR	2	SDHKLYNENFKLNKKSNMVAAIYEEDAVFRN
PF3D7_1312800		conserved Plasmodium protein, unknown function	0.375689	-0.282838	0.0928507	-0.33687	-0.228806	0.0591507	0.126551	PF3D7_1312800	2	S	___1	S(1)FLLALNESK	1	______________MSFLLALNESKKSAEGS
PF3D7_1149000	Pf332	antigen 332, DBL-like protein	0.375607	-1.80745	-1.43184	-1.93913	-1.67578	-1.42106	-1.44263	PF3D7_1149000	1462	S	___2	S(0.007)VS(0.993)EEVLEEEGS(0.879)T(0.108)T(0.014)EK	3	VASITEEVEEEEKSVSEEVLEEEGSTTEKVV
PF3D7_0627800	ACS	acetyl-CoA synthetase, putative	0.375058	1.04667	1.42173	1.09414	0.999195	1.41009	1.43336	PF3D7_0627800	453	S	___2	ISYS(0.994)EKS(0.005)YS(0.001)K	4	KKITKNNPINHKISYSEKSYSKELINTDMVN
PF3D7_1140700		conserved Plasmodium protein, unknown function	0.374908	-3.22532	-2.85041	-3.41367	-3.03697	-2.90503	-2.79579	PF3D7_1140700	2220	S	___2	DLS(0.015)LT(0.799)S(0.811)Y(0.375)EMEER	6	NNNNNNNIIKDLSLTSYEMEERLSSMSVINK
PF3D7_1140700		conserved Plasmodium protein, unknown function	0.374908	-3.22532	-2.85041	-3.41367	-3.03697	-2.90503	-2.79579	PF3D7_1140700	2219	T	___2	DLS(0.015)LT(0.799)S(0.811)Y(0.375)EMEER	5	DNNNNNNNIIKDLSLTSYEMEERLSSMSVIN
PF3D7_0807900	TyrRS	tyrosine--tRNA ligase	0.374882	3.03773	3.41261	3.08116	2.9943	3.4018	3.42342	PF3D7_0807900	264	S	___1	SDENSAIFMDDSES(1)DVNRK	14	SKSDENSAIFMDDSESDVNRKIKKAYCPPNV
PF3D7_0322900	RPS3A	40S ribosomal protein S3A, putative	0.374778	-1.50195	-1.12717	-1.55546	-1.44843	-1.22299	-1.03135	PF3D7_0322900	106	T	___1	DCY(0.002)T(0.013)DFCGLS(0.38)IT(0.606)R	12	IINRDCYTDFCGLSITRDKLCSLIRKGYTLI
PF3D7_0606000	KIC1	conserved Plasmodium protein, unknown function	0.374748	1.61032	1.98507	1.69878	1.52185	1.99378	1.97635	PF3D7_0606000	470	S	___2	NTDVDKS(1)DESPLSEQNAEIDNHNVLINR	7	SVMSEIYNRNTDVDKSDESPLSEQNAEIDNH
PF3D7_0730900	PTP4	EMP1-trafficking protein	0.374483	3.46226	3.83674	3.4914	3.43312	3.83489	3.83859	PF3D7_0730900	1197	S	___1	SFS(0.992)S(0.008)QGIRQDFPYK	3	GMKGQKYGSKNVRSFSSQGIRQDFPYKNENN
PF3D7_0319700	ABCI3	ABC transporter I family member 1, putative	0.374393	2.73406	3.10845	2.70737	2.76074	3.03711	3.17979	PF3D7_0319700	839	S	___1	DNSNDFMLEGS(1)DEDDTCYELDTLHK	11	THQLKDNSNDFMLEGSDEDDTCYELDTLHKK
PF3D7_0401800	PfD80	Plasmodium exported protein (PHISTb), unknown function	0.374377	1.43709	1.81147	1.4444	1.42978	1.72502	1.89791	PF3D7_0401800	82	S	___1	S(0.018)PS(0.03)T(0.037)AS(0.791)T(0.129)S(0.446)T(0.56)S(0.99)LR	10	ASTTKRSPSTASTSTSLRSASTASTASTLRS
PF3D7_0106400		pre-rRNA-processing protein TSR2, putative	0.373922	1.25023	1.62416	1.20805	1.29242	1.53747	1.71084	PF3D7_0106400	118	S	___1	NIQIYDIS(0.002)CS(0.998)QEK	10	ILEKIKNIQIYDISCSQEKNLIQNYEQGDEE
PF3D7_1110400		RNA-binding protein, putative	0.373652	-0.720182	-0.34653	-0.368849	-1.07152	-0.0446491	-0.648411	PF3D7_1110400	1299	S	___1	TYDKHS(0.974)S(0.024)S(0.002)R	6	SYDYNNRKHRTYDKHSSSRNNYDRKRNSRYS
PF3D7_1022400	SRSF4	serine/arginine-rich splicing factor 4	0.373487	0.0458574	0.419345	0.0125008	0.0792141	0.359631	0.479059	PF3D7_1022400	213	S	___2	RY(0.002)S(0.998)NES(1)GLS(1)DR	9	PKYKKRRRYSNESGLSDRDRSRSRRYSKSSN
PF3D7_0212500		conserved Plasmodium protein, unknown function	0.373442	-1.17442	-0.800975	-1.17164	-1.17719	-0.73657	-0.865379	PF3D7_0212500	35	S	___1	DSSHSNINS(1)DLDVDR	9	FENDYSKDSSHSNINSDLDVDRKKHSDNVYE
PF3D7_0830500	TryThrA	sporozoite and liver stage tryptophan-rich protein, putative	0.373413	-2.79555	-2.42213	-2.93038	-2.66072	-2.4368	-2.40747	PF3D7_0830500	105	S	___3	ELADAET(0.453)T(0.733)DT(0.717)S(0.182)DS(0.915)EDEDHIINKK	13	ASKELADAETTDTSDSEDEDHIINKKVKRRK
PF3D7_0830500	TryThrA	sporozoite and liver stage tryptophan-rich protein, putative	0.373413	-2.79555	-2.42213	-2.93038	-2.66072	-2.4368	-2.40747	PF3D7_0830500	100	T	___3	ELADAET(0.003)T(0.997)DT(0.039)S(0.958)DS(0.003)EDEDHIINKK	8	ITAAIASKELADAETTDTSDSEDEDHIINKK
PF3D7_0830500	TryThrA	sporozoite and liver stage tryptophan-rich protein, putative	0.373413	-2.79555	-2.42213	-2.93038	-2.66072	-2.4368	-2.40747	PF3D7_0830500	102	T	___3	ELADAET(0.453)T(0.733)DT(0.717)S(0.182)DS(0.915)EDEDHIINKK	10	AAIASKELADAETTDTSDSEDEDHIINKKVK
PF3D7_1212700	EIF3A	eukaryotic translation initiation factor 3 subunit A, putative	0.373407	4.54304	4.91645	4.42846	4.65763	5.01077	4.82213	PF3D7_1212700	1242	S	___1	S(1)GKPENEKK	1	DRDDKLDRDSRRRERSGKPENEKKRENDISK
PF3D7_0801000		Plasmodium exported protein (PHISTc), unknown function	0.373397	-0.232777	0.14062	-0.157709	-0.307844	0.0945702	0.18667	PF3D7_0801000	393	S	___1	LKDEPVDDNT(0.5)S(0.5)NILKDEPVDDHAGK	11	NTINKLKDEPVDDNTSNILKDEPVDDHAGKH
PF3D7_0801000		Plasmodium exported protein (PHISTc), unknown function	0.373397	-0.232777	0.14062	-0.157709	-0.307844	0.0945702	0.18667	PF3D7_0801000	392	T	___1	LKDEPVDDNT(0.5)S(0.5)NILKDEPVDDHAGK	10	NNTINKLKDEPVDDNTSNILKDEPVDDHAGK
PF3D7_1140700		conserved Plasmodium protein, unknown function	0.373322	0.278928	0.65225	0.227612	0.330244	0.680801	0.623699	PF3D7_1140700	1000	S	___2	SYS(1)NNSAYVNR	3	GKNIVKNLFCNKKSYSNNSAYVNRGISEYAE
PF3D7_1140700		conserved Plasmodium protein, unknown function	0.373322	0.278928	0.65225	0.227612	0.330244	0.680801	0.623699	PF3D7_1140700	1003	S	___2	S(0.01)Y(0.001)S(0.989)NNS(1)AYVNR	6	IVKNLFCNKKSYSNNSAYVNRGISEYAEENI
PF3D7_0723800		conserved Plasmodium protein, unknown function	0.373012	1.49131	1.86432	1.5344	1.44823	1.82436	1.90429	PF3D7_0723800	531	S	___1	IVGDNFLEDLDKS(1)PIDK	13	NDKIVGDNFLEDLDKSPIDKLLYKSNNRINN
PF3D7_0322900	RPS3A	40S ribosomal protein S3A, putative	0.372708	-0.0663328	0.306376	0.0118504	-0.144516	0.38294	0.229811	PF3D7_0322900	112	S	___1	DKLCS(1)LIR	5	YTDFCGLSITRDKLCSLIRKGYTLIEGHTDV
PF3D7_0424700	FIKK4.2	serine/threonine protein kinase, FIKK family	0.372637	2.06602	2.43865	2.11679	2.01525	2.35885	2.51846	PF3D7_0424700	123	S	___1	KTEENS(1)EEIRK	6	RCSNLLKEKKKTEENSEEIRKYLSDKTKKRN
PF3D7_0812500		RNA-binding protein, putative	0.372512	-3.59389	-3.22138	-3.47611	-3.71167	-3.25183	-3.19093	PF3D7_0812500	11	S	___3	KS(1)EERLEEER	2	_____MFFNFSRKKKSEERLEEERSNTCEET
PF3D7_0812500		RNA-binding protein, putative	0.372512	-3.59389	-3.22138	-3.47611	-3.71167	-3.25183	-3.19093	PF3D7_0812500	20	S	___3	LEEERS(1)NT(1)CEETEQVEETSNNK	6	FSRKKKSEERLEEERSNTCEETEQVEETSNN
PF3D7_0812500		RNA-binding protein, putative	0.372512	-3.59389	-3.22138	-3.47611	-3.71167	-3.25183	-3.19093	PF3D7_0812500	22	T	___3	LEEERS(1)NT(1)CEETEQVEETSNNK	8	RKKKSEERLEEERSNTCEETEQVEETSNNKR
PF3D7_0812500		RNA-binding protein, putative	0.372512	-3.59389	-3.22138	-3.47611	-3.71167	-3.25183	-3.19093	PF3D7_0812500	26	T	___3	LEEERS(0.451)NT(0.557)CEET(0.986)EQVEET(0.005)S(0.001)NNK	12	SEERLEEERSNTCEETEQVEETSNNKRGRKQ
PF3D7_1249100		conserved Plasmodium protein, unknown function	0.372413	-1.63249	-1.26007	-1.77044	-1.49454	-1.1557	-1.36445	PF3D7_1249100	104	S	___1	KENS(1)DYIR	4	SNVEKQLNEEIRKENSDYIRFAPLRNIIKNF
PF3D7_1427600	MIT3	CorA-like Mg2+ transporter protein, putative	0.372192	2.73123	3.10342	2.69181	2.77065	3.16417	3.04267	PF3D7_1427600	76	S	___1	RNSS(1)EEYR	4	SSYMNYIKRGFKRNSSEEYRIHNNISDEEHI
PF3D7_1022000		RNA-binding protein, putative	0.371983	-2.48139	-2.10941	-2.38729	-2.57549	-2.18497	-2.03385	PF3D7_1022000	719	S	___1	NKFPLNNS(0.998)NNCDS(0.001)VPSIYPK	8	SLLENEYKNKFPLNNSNNCDSVPSIYPKMFT
PF3D7_1002400.2-p1		RNA-binding protein, putative	0.371958	0.234723	0.606681	0.0583611	0.411085	0.575451	0.637911	PF3D7_1002400.2-p1;PF3D7_1002400	8;8	S	___3	EAHS(1)ES(1)EEPVHK	4	________MSSKEAHSESEEPVHKNDGSTLY
PF3D7_0302100	SRPK1	serine/threonine protein kinase	0.371952	2.59406	2.96601	2.66261	2.52551	2.92585	3.00618	PF3D7_0302100	400	S	___1	INDCHS(1)PNENKNK	6	IKNNISIKEKINDCHSPNENKNKDNHNQCED
PF3D7_1414500	ABCk2	atypical protein kinase, ABC-1 family, putative	0.371747	-2.26749	-1.89575	-2.44304	-2.09195	-1.95747	-1.83402	PF3D7_1414500	1259	T	___1	S(0.004)NKDT(0.643)ES(0.353)NPNK	5	HHHHHDNNINKSNKDTESNPNKSINIYPNIS
PF3D7_0411800		conserved Plasmodium protein, unknown function	0.371433	-0.178118	0.193316	-0.0146103	-0.341625	0.26016	0.126471	PF3D7_0411800	838	S	___1	IKS(1)DDDTFSLGMNENNCYIISK	3	YEGSEGVVIHKNKIKSDDDTFSLGMNENNCY
PF3D7_1104200	SNF2L	chromatin remodeling protein	0.371378	-2.73273	-2.36135	-2.63859	-2.82687	-2.2291	-2.4936	PF3D7_1104200	812	S	___1	T(0.008)QDIS(0.172)S(0.779)IS(0.042)DEDIDIILADAEKR	6	LNFGAPEVYKTQDISSISDEDIDIILADAEK
PF3D7_1448300		conserved Plasmodium protein, unknown function	0.370703	-3.92394	-3.55323	-3.88501	-3.96286	-3.8079	-3.29857	PF3D7_1448300	169	S	___1	NTEGYDENILNDEGNLS(1)DEGEEVEEENVDER	17	TEGYDENILNDEGNLSDEGEEVEEENVDERD
PF3D7_1119300	U2AF1	splicing factor U2AF small subunit, putative	0.370608	-2.41838	-2.04777	-2.63717	-2.19958	-1.87773	-2.21781	PF3D7_1119300	228	S	___1	S(0.778)S(0.222)HHY(0.041)S(0.79)S(0.169)K	1	ESYREGKDKYKRDRRSSHHYSSKRKNRSDNE
PF3D7_1445400	CLK1	protein serine/threonine kinase-1	0.370598	0.345583	0.716181	0.458031	0.233135	0.777802	0.65456	PF3D7_1445400	412	S	___1	VYDS(1)LKR	4	KRKKKKYSNESKVYDSLKRDETNHHTNNNSY
PF3D7_0401800	PfD80	Plasmodium exported protein (PHISTb), unknown function	0.370078	4.62246	4.99254	4.72271	4.52221	4.89671	5.08837	PF3D7_0401800	135	S	___1	S(1)AS(1)AASTTR	3	STASTASAASTTRSASAASTTRSASAASTTR
PF3D7_1305000		conserved Plasmodium protein, unknown function	0.369827	0.997443	1.36727	1.1591	0.835785	1.30391	1.43063	PF3D7_1305000	630	S	___1	QNINLNDDNTKDDAS(1)NYNYEESAECTMKK	15	KQNINLNDDNTKDDASNYNYEESAECTMKKL
PF3D7_1222000		tRNA-splicing ligase RtcB, putative	0.369473	0.904898	1.27437	0.937721	0.872074	1.25892	1.28982	PF3D7_1222000	457	T	___2	EYMYVT(1)RKGAT(0.531)S(0.429)S(0.04)K	6	MYLDNNEIKKEYMYVTRKGATSSKKNQYGII
PF3D7_1222000		tRNA-splicing ligase RtcB, putative	0.369473	0.904898	1.27437	0.937721	0.872074	1.25892	1.28982	PF3D7_1222000	462	T	___2	EYMYVT(1)RKGAT(0.531)S(0.429)S(0.04)K	11	NEIKKEYMYVTRKGATSSKKNQYGIIPGNMK
PF3D7_0302500	CLAG3.1	cytoadherence linked asexual protein 3.1	0.369409	-1.31001	-0.940604	-1.22846	-1.39157	-0.883059	-0.99815	PF3D7_0302500	1326	T	___1	MS(0.051)T(0.945)Y(0.003)VDDFAFFDDCGKNEQFLNER	3	LRRYDMENAFKNKMSTYVDDFAFFDDCGKNE
PF3D7_0625200		conserved Plasmodium protein, unknown function	0.369317	-0.132622	0.236695	0.0157509	-0.280994	0.282921	0.19047	PF3D7_0625200	376	S	___1	ELFENS(1)IDKDIFSDT	6	KKERAKGKGKELFENSIDKDIFSDT______
PF3D7_0509800	PI4K	phosphatidylinositol 4-kinase	0.369232	0.564418	0.93365	0.545971	0.582865	0.8822	0.9851	PF3D7_0509800	1181	S	___1	KNS(1)NNEFIDYNEHMVK	3	NIEKNETFEEMKRKNSNNEFIDYNEHMVKLS
PF3D7_1149000	Pf332	antigen 332, DBL-like protein	0.369062	-1.25171	-0.882649	-1.20888	-1.29454	-0.80271	-0.962589	PF3D7_1149000	1391	T	___1	EAS(0.073)IT(0.927)EEVEQIEPVTGK	5	REGSINEDIVKEASITEEVEQIEPVTGKVEK
PF3D7_0415200		conserved Plasmodium protein, unknown function	0.369013	-1.09531	-0.726299	-1.18009	-1.01053	-0.576399	-0.8762	PF3D7_0415200	1605	S	___2	KY(0.005)EY(0.016)LDFS(0.914)EKS(0.511)T(0.474)EY(0.081)NNK	8	INNKLNDKKYEYLDFSEKSTEYNNKCLKVDN
PF3D7_0415200		conserved Plasmodium protein, unknown function	0.369013	-1.09531	-0.726299	-1.18009	-1.01053	-0.576399	-0.8762	PF3D7_0415200	1608	S	___2	KY(0.005)EY(0.016)LDFS(0.914)EKS(0.511)T(0.474)EY(0.081)NNK	11	KLNDKKYEYLDFSEKSTEYNNKCLKVDNVNI
PF3D7_0416800	SAR1	small GTP-binding protein sar1	0.368923	-0.432583	-0.0636597	-0.44323	-0.421936	-0.05019	-0.0771294	PF3D7_0416800	138	S	___1	IDKPDAAS(1)EDELR	8	PFVVLGNKIDKPDAASEDELRQHLNLFSNIT
PF3D7_0613700		syntaxin binding protein, putative	0.368592	-1.5495	-1.18091	-1.50815	-1.59085	-1.09329	-1.26852	PF3D7_0613700	104	S	___3	Y(1)KNIHILFT(1)S(1)NISK	10	DEKCAKYKNIHILFTSNISKDNQILDLIASN
PF3D7_0613700		syntaxin binding protein, putative	0.368592	-1.5495	-1.18091	-1.50815	-1.59085	-1.09329	-1.26852	PF3D7_0613700	103	T	___3	Y(1)KNIHILFT(1)S(1)NISK	9	KDEKCAKYKNIHILFTSNISKDNQILDLIAS
PF3D7_0613700		syntaxin binding protein, putative	0.368592	-1.5495	-1.18091	-1.50815	-1.59085	-1.09329	-1.26852	PF3D7_0613700	95	Y	___3	Y(1)KNIHILFT(1)S(1)NISK	1	VDIMINDFKDEKCAKYKNIHILFTSNISKDN
PF3D7_0708800	HSP110c	heat shock protein 110	0.368573	-1.58904	-1.22046	-1.458	-1.72008	-1.27311	-1.16782	PF3D7_0708800	863	T	___2	NNEEKENS(0.389)T(0.611)KNENS(1)ANPEE	9	EQNNEAKNNEEKENSTKNENSANPEE_____
PF3D7_0826500	UBE4B	ubiquitin conjugation factor E4 B, putative	0.368247	1.9588	2.32705	1.99874	1.91887	2.37677	2.27733	PF3D7_0826500	726	S	___1	NGS(1)LDEDLNRDER	3	GVVENNQMNESGRNGSLDEDLNRDEREGINI
PF3D7_0730300	ApiAP2	AP2 domain transcription factor AP2-L, putative	0.367978	-3.35024	-2.98226	-3.29409	-3.40639	-2.88895	-3.07557	PF3D7_0730300	901	S	___1	CNQDS(0.054)Y(0.001)S(0.729)T(0.217)NEEPLS(0.098)NHS(0.902)INDPGK	17	NQDSYSTNEEPLSNHSINDPGKIKDGIMYDG
PF3D7_0912900	RPN8	26S proteasome regulatory subunit RPN8, putative	0.367863	0.809618	1.17748	0.86499	0.754246	1.12351	1.23145	PF3D7_0912900	302	S	___1	S(1)LENDIEKDK	1	INNKIENKLNSEKKKSLENDIEKDKIKDKEK
PF3D7_1345400		conserved Plasmodium protein, unknown function	0.367718	1.12425	1.49197	1.21487	1.03362	1.38113	1.6028	PF3D7_1345400	1395	S	___2	FHQNLS(1)DVT(1)VT(1)EEEKLDEYEK	6	IVIKKKRKIRFHQNLSDVTVTEEEKLDEYEK
PF3D7_1345400		conserved Plasmodium protein, unknown function	0.367718	1.12425	1.49197	1.21487	1.03362	1.38113	1.6028	PF3D7_1345400	1400	T	___2	FHQNLS(1)DVT(1)VT(1)EEEKLDEYEK	11	KRKIRFHQNLSDVTVTEEEKLDEYEKTKKKQ
PF3D7_0922100		ubiquitin-like protein, putative	0.367667	1.13461	1.50228	1.21156	1.05766	1.51579	1.48877	PF3D7_0922100	1199	S	___1	SSNENNLFKDT(0.018)NS(0.982)YK	13	KKKSSNENNLFKDTNSYKSKSASHSFSDATS
PF3D7_1123100	CDPK7	calcium-dependent protein kinase 7	0.367553	0.678272	1.04583	0.81505	0.541494	1.00679	1.08486	PF3D7_1123100	883	S	___2	NANS(1)S(1)FES(1)EHEDLKR	4	EYSIHKDKDDKKNANSSFESEHEDLKRQFIN
PF3D7_1123100	CDPK7	calcium-dependent protein kinase 7	0.367553	0.678272	1.04583	0.81505	0.541494	1.00679	1.08486	PF3D7_1123100	887	S	___2	NANS(1)S(1)FES(1)EHEDLKR	8	HKDKDDKKNANSSFESEHEDLKRQFINMKEK
PF3D7_1223100	PKAr	cAMP-dependent protein kinase regulatory subunit	0.367258	1.22395	1.59121	1.08634	1.36156	1.8354	1.34701	PF3D7_1223100	66	S	___1	GFS(0.975)LS(0.025)K	3	NNDGEDDRYKFSRGFSLSKKPSKTKIPITKT
PF3D7_1442900	ARFGEF	protein transport protein SEC7, putative	0.366802	-0.782137	-0.415335	-0.724899	-0.839375	-0.4816	-0.34907	PF3D7_1442900	1828	S	___1	NNENLKHEDRENENHS(1)DGHNAER	16	NNENLKHEDRENENHSDGHNAERNDIDEEDS
PF3D7_0923400		conserved Plasmodium protein, unknown function	0.366713	0.135192	0.501904	0.11607	0.154314	0.445	0.558809	PF3D7_0923400	324	T	___2	RS(0.391)T(0.647)DT(0.962)VDNYK	3	VISHYEFDKPCEKRSTDTVDNYKNNIRYKKE
PF3D7_0201900	EMP3	erythrocyte membrane protein 3	0.366657	3.26618	3.63284	3.37058	3.16178	3.57888	3.68679	PF3D7_0201900	2422	S	___1	NVKDDELS(1)DNESSDNEK	8	NKPTDGLKNVKDDELSDNESSDNEKSKKNLR
PF3D7_0914500		conserved Plasmodium protein, unknown function	0.366623	0.360622	0.727245	0.456961	0.264284	0.65852	0.795971	PF3D7_0914500	1027	S	___1	MDVSYY(0.047)S(0.929)DNS(0.023)VQIK	7	DKNPYKNYKMDVSYYSDNSVQIKEKRKKSSI
PF3D7_1021700		conserved Plasmodium membrane protein, unknown function	0.366343	-2.86834	-2.50199	-2.9542	-2.78248	-2.50765	-2.49634	PF3D7_1021700	2017	S	___1	SYS(0.5)T(0.5)HQSYR	3	DNHMNENIRGSHRSYSTHQSYRTHQSYKRHA
PF3D7_1021700		conserved Plasmodium membrane protein, unknown function	0.366343	-2.86834	-2.50199	-2.9542	-2.78248	-2.50765	-2.49634	PF3D7_1021700	2018	T	___1	SYS(0.5)T(0.5)HQSYR	4	NHMNENIRGSHRSYSTHQSYRTHQSYKRHAN
PF3D7_1430300		acid phosphatase, putative	0.365743	2.30724	2.67299	2.49031	2.12417	2.77021	2.57576	PF3D7_1430300	1215	S	___1	DT(0.079)S(0.921)KNFNMCK	3	DELQKKDKDQHQRDTSKNFNMCKYDTKQNFL
PF3D7_0723900		RNA-binding protein, putative	0.365619	-2.07872	-1.7131	-2.15192	-2.00553	-1.72289	-1.70332	PF3D7_0723900	421	S	___1	VNTNNS(1)AYR	6	NNNFSYNNSRVNTNNSAYRGKNNNMQNEKNN
PF3D7_0601900		conserved Plasmodium protein, unknown function	0.365592	5.1347	5.50029	5.21763	5.05177	5.45385	5.54673	PF3D7_0601900	96	S	___1	HS(0.001)S(0.999)LPNER	3	EDDDDDDDYQPPRHSSLPNERKTSSSSRQAA
PF3D7_1314700		pinin/SDK/MemA domain-containing protein, putative	0.365512	0.731138	1.09665	0.818241	0.644035	1.15981	1.03349	PF3D7_1314700	58	S	___1	IS(0.175)S(0.825)NENLDKLPEFK	3	HNVEDIKKIKQKRISSNENLDKLPEFKIEKR
PF3D7_0104300	UBP1	ubiquitin carboxyl-terminal hydrolase 1, putative	0.365294	-1.62984	-1.26454	-1.4426	-1.81708	-1.43452	-1.09457	PF3D7_0104300	1105	S	___2	YS(0.006)PS(0.994)DHEK	4	IHTYIVETRKDKYSPSDHEKQNSFIKERVLH
PF3D7_0104300	UBP1	ubiquitin carboxyl-terminal hydrolase 1, putative	0.365294	-1.62984	-1.26454	-1.4426	-1.81708	-1.43452	-1.09457	PF3D7_0104300	1112	S	___2	YS(0.09)PS(0.91)DHEKQNS(1)FIK	11	TRKDKYSPSDHEKQNSFIKERVLHSKKKIKG
PF3D7_0105800		conserved Plasmodium protein, unknown function	0.365203	2.77013	3.13533	2.92901	2.61124	3.20665	3.06401	PF3D7_0105800	136	S	___1	DS(0.5)S(0.5)YIRNENK	3	RSIVNNTIKNKTRDSSYIRNENKSCYIGDKN
PF3D7_0624600	ISWI	SNF2 helicase, putative	0.365197	-2.41998	-2.05478	-2.49111	-2.34884	-1.98667	-2.12289	PF3D7_0624600	1243	S	___1	LVVQTQDDEDMLDNFEEKLS(0.5)S(0.5)DEIRK	20	TQDDEDMLDNFEEKLSSDEIRKLMLHGKAAI
PF3D7_0624600	ISWI	SNF2 helicase, putative	0.365197	-2.41998	-2.05478	-2.49111	-2.34884	-1.98667	-2.12289	PF3D7_0624600	1244	S	___1	LVVQTQDDEDMLDNFEEKLS(0.5)S(0.5)DEIRK	21	QDDEDMLDNFEEKLSSDEIRKLMLHGKAAIQ
PF3D7_1241900		tetratricopeptide repeat protein, putative	0.364979	-0.395493	-0.0305138	-0.391649	-0.399336	0.0186214	-0.079649	PF3D7_1241900	362	T	___1	TQNEYPVEEHT(1)S(1)NEVEKNK	11	ECVNKTQNEYPVEEHTSNEVEKNKKDIDSTN
PF3D7_1224500	ASF1	histone chaperone ASF1, putative	0.364867	2.43719	2.80206	2.46082	2.41356	2.77566	2.82845	PF3D7_1224500	248	S	___1	NNELS(1)S(1)DLDKCEIFNANINGISR	6	NNFNQNNFLKNNELSSDLDKCEIFNANINGI
PF3D7_0906600		zinc finger protein, putative	0.364778	2.16881	2.53359	2.21172	2.12589	2.51887	2.5483	PF3D7_0906600	744	S	___1	ESS(1)NNEDMLNNK	3	DDINNNTAPSTGRESSNNEDMLNNKMVMNND
PF3D7_0727400		proteasome subunit alpha type-5, putative	0.364477	-2.47371	-2.10923	-2.57021	-2.37721	-2.01894	-2.19953	PF3D7_0727400	55	S	___1	RIS(0.751)S(0.102)T(0.146)LIEK	3	ICVNDGVILASERRISSTLIEKDSVEKLLSI
PF3D7_0728000	eIF2alpha	eukaryotic translation initiation factor 2 subunit alpha, putative	0.364283	0.370118	0.734401	0.393631	0.346605	0.695261	0.77354	PF3D7_0728000	59	S	___1	IEDMGAYVSILEYNDMEGMILMS(0.5)ELS(0.5)KRR	26	LEYNDMEGMILMSELSKRRFRSVNKLIRVGR
PF3D7_0424500	FIKK4.1	serine/threonine protein kinase, FIKK family	0.364007	3.09401	3.45802	3.16516	3.02286	3.47103	3.445	PF3D7_0424500	265	S	___1	DWTLNTIPDIGYS(1)QNNRR	13	SYKDWTLNTIPDIGYSQNNRRSQEVFKTEVK
PF3D7_1324600		conserved Plasmodium protein, unknown function	0.363953	-2.38053	-2.01657	-2.33285	-2.42821	-2.03469	-1.99846	PF3D7_1324600	1355	S	___1	RDINS(1)EHDQR	5	MVKRYIRRNRKRDINSEHDQRDGSKNKVEMK
PF3D7_1027800	RPL3	60S ribosomal protein L3	0.363803	1.38595	1.74976	1.32976	1.44214	1.72066	1.77885	PF3D7_1027800	293	T	___1	TDKNS(0.003)AS(0.12)T(0.877)DADITEKK	8	KIYRIGLKTDKNSASTDADITEKKITPMGGF
PF3D7_0918900	gammaGCS	gamma-glutamylcysteine synthetase	0.363624	-0.652818	-0.289194	-0.76211	-0.543526	-0.177769	-0.40062	PF3D7_0918900	338	S	___1	KT(0.019)DS(0.981)LFECEVFKPEQTNK	4	SNTQDIFISSLKKTDSLFECEVFKPEQTNKY
PF3D7_1139300	ApiAP2	AP2 domain transcription factor, putative	0.363192	2.06819	2.43139	2.14157	1.99482	2.4631	2.39967	PF3D7_1139300	1669	S	___1	VYS(0.021)S(0.979)DCEK	4	NDYTNDDNHSSKVYSSDCEKNTNHNKKTEDK
PF3D7_1449500	ApiAP2	AP2 domain transcription factor, putative	0.363013	-2.99465	-2.63163	-3.21629	-2.77301	-2.76985	-2.49342	PF3D7_1449500	31	S	___3	NT(0.019)S(0.02)YEKAS(0.96)EIVES(0.562)DMY(0.532)ES(0.886)NEDS(0.018)NT(0.003)K	8	ENDSHLVKNTSYEKASEIVESDMYESNEDSN
PF3D7_1449500	ApiAP2	AP2 domain transcription factor, putative	0.363013	-2.99465	-2.63163	-3.21629	-2.77301	-2.76985	-2.49342	PF3D7_1449500	36	S	___3	ASEIVES(1)DMYESNEDSNTK	7	LVKNTSYEKASEIVESDMYESNEDSNTKNKG
PF3D7_1449500	ApiAP2	AP2 domain transcription factor, putative	0.363013	-2.99465	-2.63163	-3.21629	-2.77301	-2.76985	-2.49342	PF3D7_1449500	41	S	___3	ASEIVESDMYES(1)NEDSNTK	12	SYEKASEIVESDMYESNEDSNTKNKGVWYNA
PF3D7_1449500	ApiAP2	AP2 domain transcription factor, putative	0.363013	-2.99465	-2.63163	-3.21629	-2.77301	-2.76985	-2.49342	PF3D7_1449500	39	Y	___3	ASEIVES(0.036)DMY(0.977)ES(0.984)NEDS(0.003)NTK	10	NTSYEKASEIVESDMYESNEDSNTKNKGVWY
PF3D7_1139300	ApiAP2	AP2 domain transcription factor, putative	0.362713	3.15125	3.51397	3.33806	2.96445	3.50596	3.52197	PF3D7_1139300	1800	S	___1	S(1)NEKLENILDGGVNMR	1	SFDKCSNENSVCINKSNEKLENILDGGVNMR
PF3D7_1214900		conserved Plasmodium membrane protein, unknown function	0.362348	-0.297192	0.065156	-0.314669	-0.279715	0.0686111	0.0617008	PF3D7_1214900	239	T	___1	QQSEAYKIENVT(1)EFDDEV	12	EVFRQQSEAYKIENVTEFDDEV_________
PF3D7_0501200	PIESP2	parasite-infected erythrocyte surface protein	0.362179	-2.18362	-1.82144	-2.17053	-2.1967	-1.93362	-1.70926	PF3D7_0501200	274	S	___1	T(0.009)LILGS(0.991)FPQAGEILREDLWNKEDNK	6	PEKEIRQESRTLILGSFPQAGEILREDLWNK
PF3D7_0617200		conserved Plasmodium protein, unknown function	0.361923	1.12451	1.48643	1.24481	1.00421	1.45674	1.51612	PF3D7_0617200	23	S	___1	LGS(1)ISQSIDEIKK	3	KIEKPDFDAYNEKLGSISQSIDEIKKKIDNL
PF3D7_0904600		ubiquitin specific protease, putative	0.361748	0.778933	1.14068	0.62479	0.933075	1.28028	1.00108	PF3D7_0904600	1033	S	___1	S(0.003)Y(0.001)NS(0.942)S(0.027)S(0.027)NKK	4	SANEMNINNFNKSYNSSSNKKNSIPCNSSNG
PF3D7_0904800	RPA1	replication protein A1, small fragment	0.361668	-1.4042	-1.04253	-1.61994	-1.18847	-1.01797	-1.0671	PF3D7_0904800	476	T	___1	RS(0.242)LNDDT(0.729)NDS(0.029)K	7	NNDNSHRAKRSLNDDTNDSKKQKL_______
PF3D7_0823200		RNA-binding protein, putative	0.361412	0.693058	1.05447	0.704571	0.681545	1.1213	0.98764	PF3D7_0823200	45	S	___1	YGTITQVYYVPAT(0.265)AQS(0.735)PR	16	YGTITQVYYVPATAQSPRGWAFITYEQRSEA
PF3D7_0501400	FIRA	interspersed repeat antigen	0.361138	0.0101929	0.371331	0.19482	-0.174435	0.386992	0.355671	PF3D7_0501400	414	S	___2	KGS(1)EGDNIS(1)LS(0.944)S(0.055)LS(0.001)EETQEK	3	QEPVTVEEHIDEKKGSEGDNISLSSLSEETQ
PF3D7_1139300	ApiAP2	AP2 domain transcription factor, putative	0.361097	4.86592	5.22702	4.97959	4.75225	5.31027	5.14377	PF3D7_1139300	1972	S	___1	TSS(1)NIYDYFLDK	3	SSGLYYSFNVKGKTSSNIYDYFLDKKEHDYF
PF3D7_0801800		mannose-6-phosphate isomerase, putative	0.360957	-1.26105	-0.900089	-1.2518	-1.27029	-0.850279	-0.9499	PF3D7_0801800	606	T	___1	T(1)IS(1)DDGVVDSYDVSKK	1	ESDMDEVDEDEKDEKTISDDGVVDSYDVSKK
PF3D7_0606000	KIC1	conserved Plasmodium protein, unknown function	0.360623	-2.41966	-2.05903	-2.46879	-2.37053	-2.16641	-1.95166	PF3D7_0606000	528	S	___2	NNS(0.971)IY(0.029)DNICDS(0.999)FKR	3	NMNDLYINKKGDRNNSIYDNICDSFKRQESV
PF3D7_0606000	KIC1	conserved Plasmodium protein, unknown function	0.360623	-2.41966	-2.05903	-2.46879	-2.37053	-2.16641	-1.95166	PF3D7_0606000	536	S	___2	NNSIYDNICDS(1)FKR	11	KKGDRNNSIYDNICDSFKRQESVSKSLLFSD
PF3D7_1326700		conserved Apicomplexan protein, unknown function	0.360467	2.90055	3.26102	2.92546	2.87564	3.2344	3.28764	PF3D7_1326700	222	S	___1	S(0.023)T(0.004)S(0.974)DLLNDLTNK	3	INSMNNVTHTNRKSTSDLLNDLTNKNNTNYI
PF3D7_1468100		conserved Plasmodium protein, unknown function	0.360283	-2.53553	-2.17525	-2.52478	-2.54629	-2.13594	-2.21456	PF3D7_1468100	2557	T	___1	YNKNNS(1)DDVNEDNKS(1)LEDAEEEDT(1)I	24	VNEDNKSLEDAEEEDTI______________
PF3D7_1223400		phospholipid-transporting ATPase, putative	0.360217	-0.670802	-0.310585	-0.790659	-0.550945	-0.371679	-0.249491	PF3D7_1223400	875	S	___1	S(0.202)LS(0.163)NYS(0.633)DT(0.001)SYGDVHLK	6	DEKNYNDDQRSLSNYSDTSYGDVHLKNYKQN
PF3D7_0111800		eukaryotic translation initiation factor 4E, putative	0.360073	-0.501698	-0.141624	-0.34606	-0.657335	0.0470314	-0.33028	PF3D7_0111800	89	S	___1	RNS(1)KNDNMEK	3	ENDSKVFKTYRNKRNSKNDNMEKHKNDVTKN
PF3D7_1139300	ApiAP2	AP2 domain transcription factor, putative	0.360033	1.54032	1.90036	1.59058	1.49006	1.91973	1.88098	PF3D7_1139300	618	S	___1	TDNS(1)PFNKQDEEFLLNSK	4	DIKVLNGIKRLKTDNSPFNKQDEEFLLNSKN
PF3D7_0717500	CDPK4	calcium-dependent protein kinase 4	0.359902	-2.9804	-2.62049	-3.243	-2.7178	-2.60973	-2.63126	PF3D7_0717500	219	S	___1	IIDFGLS(0.844)T(0.156)HFEYSK	7	KNKEDMIIKIIDFGLSTHFEYSKKMKDKIGT
PF3D7_1107300	PAIP1	polyadenylate-binding protein-interacting protein 1, putative	0.359571	-1.36921	-1.00963	-1.34625	-1.39216	-1.05393	-0.96534	PF3D7_1107300	1973	S	___1	NDHKDESSVHS(0.998)FNS(0.973)S(0.028)RLNK	14	KKNDHKDESSVHSFNSSRLNKKDNKNDARHK
PF3D7_0914900		BSD-domain protein, putative	0.359192	1.49274	1.85193	1.50602	1.47945	1.86549	1.83837	PF3D7_0914900	570	S	___1	SACDLEEPKS(1)DFFDSSNIK	10	ISEANRSACDLEEPKSDFFDSSNIKKELNEM
PF3D7_1466200	EGXP	conserved Plasmodium protein, unknown function	0.358938	-1.14494	-0.786004	-1.1893	-1.10059	-0.919859	-0.652149	PF3D7_1466200	1326	S	___1	NIEEDLADLDEDS(0.79)T(0.21)ENINEPNHLDGQNNK	13	NFRNIEEDLADLDEDSTENINEPNHLDGQNN
PF3D7_0922700	PRP18	pre-mRNA-splicing factor 18, putative	0.358418	-1.25782	-0.8994	-1.43476	-1.08088	-0.83078	-0.968019	PF3D7_0922700	146	S	___1	LKEDS(1)LDLIEDNIEDEIEK	5	QNIFGDVLRGRLKEDSLDLIEDNIEDEIEKG
PF3D7_0305500		conserved Plasmodium protein, unknown function	0.358363	-0.785913	-0.427549	-0.76643	-0.805395	-0.352329	-0.502769	PF3D7_0305500	3702	S	___1	S(0.711)VHFY(0.289)PQHLDGNTLKK	1	ENNSVKIIDVDERKRSVHFYPQHLDGNTLKK
PF3D7_0628200	PK4	eukaryotic translation initiation factor 2-alpha kinase	0.358253	1.28777	1.64603	1.33062	1.24492	1.64227	1.64978	PF3D7_0628200	2345	S	___2	NFS(0.998)DS(0.002)IYKK	3	NPEKNHNPFLSDKNFSDSIYKKKKSHDYNSS
PF3D7_0628200	PK4	eukaryotic translation initiation factor 2-alpha kinase	0.358253	1.28777	1.64603	1.33062	1.24492	1.64227	1.64978	PF3D7_0628200	2340	S	___2	NHNPFLS(1)DKNFS(0.89)DS(0.11)IYK	7	SKNKENPEKNHNPFLSDKNFSDSIYKKKKSH
PF3D7_1423700		conserved Plasmodium protein, unknown function	0.358187	-2.16636	-1.80817	-1.95905	-2.37366	-1.85157	-1.76477	PF3D7_1423700	1508	S	___1	FSTYSNNNNNNNNNNNNNNNNNNGS(0.934)VS(0.066)FK	25	NNNNNNNNNNNNNNGSVSFKTKDDKYKNSYN
PF3D7_0418600		regulator of chromosome condensation, putative	0.358083	-1.3326	-0.974515	-1.22566	-1.43954	-1.0016	-0.94743	PF3D7_0418600	925	S	___1	LY(0.003)FS(0.994)DACS(0.002)S(0.002)NEKK	4	HKNHETDEGSNRLYFSDACSSNEKKKSKKQN
PF3D7_1345400		conserved Plasmodium protein, unknown function	0.357843	1.61226	1.97011	1.72924	1.49529	1.97547	1.96474	PF3D7_1345400	1395	S	___3	FHQNLS(1)DVT(1)VT(1)EEEKLDEYEK	6	IVIKKKRKIRFHQNLSDVTVTEEEKLDEYEK
PF3D7_1345400		conserved Plasmodium protein, unknown function	0.357843	1.61226	1.97011	1.72924	1.49529	1.97547	1.96474	PF3D7_1345400	1398	T	___3	FHQNLS(1)DVT(1)VT(1)EEEKLDEYEK	9	KKKRKIRFHQNLSDVTVTEEEKLDEYEKTKK
PF3D7_1345400		conserved Plasmodium protein, unknown function	0.357843	1.61226	1.97011	1.72924	1.49529	1.97547	1.96474	PF3D7_1345400	1400	T	___3	FHQNLS(1)DVT(1)VT(1)EEEKLDEYEK	11	KRKIRFHQNLSDVTVTEEEKLDEYEKTKKKQ
PF3D7_0500800	MESA	mature parasite-infected erythrocyte surface antigen	0.357773	5.60119	5.95896	5.65395	5.54843	5.96349	5.95443	PF3D7_0500800	448	T	___1	NIET(1)DDEEET(1)LVVKDDAK	4	FQMLGCNFLCNKNIETDDEEETLVVKDDAKK
PF3D7_0711400	SAP18	histone deacetylase complex subunit SAP18, putative	0.357733	-1.08245	-0.724714	-0.9571	-1.20779	-0.641489	-0.80794	PF3D7_0711400	380	S	___1	NEKHEDT(0.158)S(0.842)KDFFYNK	8	KEKKRTWKNEKHEDTSKDFFYNKEKTHSLEG
PF3D7_0702500		Plasmodium exported protein, unknown function	0.357148	0.250168	0.607316	0.106071	0.394264	0.620241	0.594391	PF3D7_0702500	66	S	___1	S(0.033)S(0.005)S(0.914)VT(0.047)K	3	RSYKKRKGMRILKSSSVTKGRLYRGTVFDED
PF3D7_1466200	EGXP	conserved Plasmodium protein, unknown function	0.357058	-3.1751	-2.81804	-3.3789	-2.9713	-2.93277	-2.70332	PF3D7_1466200	1327	T	___1	NIEEDLADLDEDS(0.5)T(0.5)ENINEPNHLDGQNNK	14	FRNIEEDLADLDEDSTENINEPNHLDGQNNK
PF3D7_1421800		conserved Plasmodium protein, unknown function	0.356914	0.571902	0.928816	0.640141	0.503664	0.900381	0.957251	PF3D7_1421800	119	S	___1	KDIEFHTLYES(1)DEKNNMVSR	11	CDGRKKDIEFHTLYESDEKNNMVSRRSSVES
PF3D7_1346300	ALBA2	DNA/RNA-binding protein Alba 2	0.356749	4.14444	4.50119	4.24593	4.04294	4.51299	4.48938	PF3D7_1346300	5	T	___2	PGS(1)T(1)KS(0.996)DT(0.004)KLENEIR	4	___________MPGSTKSDTKLENEIRISYK
PF3D7_1317000	USP39	U4/U6.U5 tri-snRNP-associated protein 2, putative	0.356712	3.32788	3.68459	3.40294	3.25282	3.69473	3.67445	PF3D7_1317000	413	S	___2	FNES(1)DNDS(1)KDYLK	4	GNEESQENMELKFNESDNDSKDYLKNINEEE
PF3D7_1317000	USP39	U4/U6.U5 tri-snRNP-associated protein 2, putative	0.356712	3.32788	3.68459	3.40294	3.25282	3.69473	3.67445	PF3D7_1317000	417	S	___2	FNES(1)DNDS(1)KDYLK	8	SQENMELKFNESDNDSKDYLKNINEEEVEEE
PF3D7_0801800		mannose-6-phosphate isomerase, putative	0.356558	-1.72683	-1.37027	-1.68211	-1.77155	-1.27747	-1.46307	PF3D7_0801800	715	Y	___1	VCEKECATGCS(0.006)NEY(0.786)T(0.208)NVYDNLNK	14	TKVCEKECATGCSNEYTNVYDNLNKQNDPYF
PF3D7_1332900	cyto-IRS	isoleucine--tRNA ligase, putative	0.356423	2.96226	3.31869	3.02026	2.90426	3.30444	3.33293	PF3D7_1332900	346	S	___1	HADEDIYS(1)DHINVNK	8	KCDTSNEKHADEDIYSDHINVNKNNNKNNNS
PF3D7_0607000		translation initiation factor IF-2, putative	0.356382	-0.628167	-0.271785	-0.522499	-0.733835	-0.297909	-0.245661	PF3D7_0607000	234	S	___1	EKS(0.5)KS(0.5)EYINLDINK	3	KQLKESGMLIEPREKSKSEYINLDINKTKLL
PF3D7_0607000		translation initiation factor IF-2, putative	0.356382	-0.628167	-0.271785	-0.522499	-0.733835	-0.297909	-0.245661	PF3D7_0607000	236	S	___1	EKS(0.5)KS(0.5)EYINLDINK	5	LKESGMLIEPREKSKSEYINLDINKTKLLLK
PF3D7_0419900		phosphatidylinositol 4-kinase, putative	0.356343	-0.563128	-0.206784	-0.519119	-0.607136	-0.175009	-0.23856	PF3D7_0419900	2070	S	___1	IRS(1)FEK	3	YKMDNVDVISSHRIRSFEKESICLSDEHMVD
PF3D7_1426400		MORN repeat protein, putative	0.355762	2.57014	2.9259	2.71932	2.42096	2.9309	2.9209	PF3D7_1426400	2	S	___3	MS(1)RIIY(1)S(1)DEK	2	______________MSRIIYSDEKKTKGKYI
PF3D7_1426400		MORN repeat protein, putative	0.355762	2.57014	2.9259	2.71932	2.42096	2.9309	2.9209	PF3D7_1426400	7	S	___3	MS(1)RIIY(1)S(1)DEK	7	_________MSRIIYSDEKKTKGKYIYANGN
PF3D7_1426400		MORN repeat protein, putative	0.355762	2.57014	2.9259	2.71932	2.42096	2.9309	2.9209	PF3D7_1426400	6	Y	___3	MS(1)RIIY(1)S(1)DEK	6	__________MSRIIYSDEKKTKGKYIYANG
PF3D7_1107300	PAIP1	polyadenylate-binding protein-interacting protein 1, putative	0.355474	-1.39062	-1.03515	-1.39941	-1.38184	-1.18172	-0.88858	PF3D7_1107300	3036	S	___1	KLS(1)LNLMK	3	GNMKNMDQNKNMKKLSLNLMKNKNNLQQSKM
PF3D7_0815800	VPS9	vacuolar protein sorting-associated protein 9, putative	0.355272	1.9866	2.34188	2.05703	1.91618	2.33912	2.34463	PF3D7_0815800	406	S	___1	NYS(1)DSCNHMINHISSENIIK	3	NNNINNDMKETMKNYSDSCNHMINHISSENI
PF3D7_0916400		conserved Plasmodium protein, unknown function	0.355098	0.474503	0.8296	0.454151	0.494854	0.831371	0.827829	PF3D7_0916400	1788	S	___1	T(0.025)IES(0.975)DDKNGK	4	HEHISNNNSLDKTIESDDKNGKIGILLTNIE
PF3D7_0812500		RNA-binding protein, putative	0.355028	-0.809123	-0.454095	-0.58086	-1.03739	-0.344629	-0.56356	PF3D7_0812500	731	T	___1	KYS(0.071)NY(0.002)NT(0.903)Y(0.024)NNNDNYNNKDFK	7	YDKEYYNKRKYSNYNTYNNNDNYNNKDFKSY
PF3D7_0606000	KIC1	conserved Plasmodium protein, unknown function	0.354958	1.07474	1.4297	1.13859	1.01089	1.42822	1.43117	PF3D7_0606000	473	S	___2	NTDVDKS(0.007)DES(0.993)PLS(1)EQNAEIDNHNVLINR	10	SEIYNRNTDVDKSDESPLSEQNAEIDNHNVL
PF3D7_0718100	EST	exported serine/threonine protein kinase	0.354948	-0.388092	-0.033144	-0.308578	-0.467606	-0.0236988	-0.0425892	PF3D7_0718100	1126	S	___1	LEEDS(1)EEMER	5	THEHMVEKKVKLEEDSEEMERNTNNNKINYD
PF3D7_0214400		conserved Plasmodium protein, unknown function	0.354757	1.99554	2.3503	2.02524	1.96584	2.32217	2.37842	PF3D7_0214400	194	S	___1	NKS(1)EQNFFEIQPNNEEEKELFK	3	HLKPISKNFIEIKNKSEQNFFEIQPNNEEEK
PF3D7_0827300		conserved Plasmodium protein, unknown function	0.354738	-0.925603	-0.570865	-0.86293	-0.988276	-0.600969	-0.54076	PF3D7_0827300	459	S	___1	INQEDKS(0.426)DIS(0.568)LS(0.003)T(0.003)CCMQSEK	10	EMETGRINQEDKSDISLSTCCMQSEKNKENE
PF3D7_0500800	MESA	mature parasite-infected erythrocyte surface antigen	0.354662	1.82048	2.17515	1.82688	1.81409	2.19817	2.15212	PF3D7_0500800	1276	S	___1	NT(0.046)S(0.954)GLVHR	3	SEEESEEESDEEKNTSGLVHRRNCKKEKKYN
PF3D7_0708800	HSP110c	heat shock protein 110	0.354583	-0.191822	0.162761	-0.463789	0.0801449	0.186041	0.139481	PF3D7_0708800	455	S	___1	LYTRDS(1)LKK	6	NDASKSNVEKLYTRDSLKKKVKKIVIPEKGH
PF3D7_0609700	KIC6	conserved Plasmodium protein, unknown function	0.354553	-1.59732	-1.24276	-1.6005	-1.59414	-1.27806	-1.20747	PF3D7_0609700	22	S	___1	KS(0.049)LNS(0.951)PHNNNNDNYNNNYTYDENSLVK	5	KNSFLLQSYFKKSLNSPHNNNNDNYNNNYTY
PF3D7_0730900	PTP4	EMP1-trafficking protein	0.354444	-1.53632	-1.18187	-1.38624	-1.6864	-1.30284	-1.06091	PF3D7_0730900	1765	S	___1	LKS(1)DIGNFK	3	GKEKNNTQNETHKLKSDIGNFKNSLHKEEKN
PF3D7_1328500		alpha/beta-hydrolase, putative	0.354237	-1.29704	-0.942805	-1.25732	-1.33677	-0.93272	-0.95289	PF3D7_1328500	259	S	___2	YT(0.002)S(0.045)T(0.284)S(0.836)S(0.833)LNKVNGNNNIECENLR	5	IEVKSEVNIPKYTSTSSLNKVNGNNNIECEN
PF3D7_1328500		alpha/beta-hydrolase, putative	0.354237	-1.29704	-0.942805	-1.25732	-1.33677	-0.93272	-0.95289	PF3D7_1328500	260	S	___2	YT(0.002)S(0.045)T(0.284)S(0.836)S(0.833)LNKVNGNNNIECENLR	6	EVKSEVNIPKYTSTSSLNKVNGNNNIECENL
PF3D7_0728000	eIF2alpha	eukaryotic translation initiation factor 2 subunit alpha, putative	0.353938	0.432782	0.78672	0.46126	0.404305	0.743391	0.83005	PF3D7_0728000	56	S	___1	IEDMGAYVSILEYNDMEGMILMS(0.536)ELS(0.464)KRR	23	VSILEYNDMEGMILMSELSKRRFRSVNKLIR
PF3D7_1445400	CLK1	protein serine/threonine kinase-1	0.353892	-1.15839	-0.804495	-1.03308	-1.2837	-0.93755	-0.67144	PF3D7_1445400	266	Y	___2	DIY(0.631)QPS(0.326)S(0.203)S(0.84)LHKYK	3	KSISRWEDNYTYKDIYQPSSSLHKYKRRSNF
PF3D7_0103300		conserved Plasmodium protein, unknown function	0.353857	-1.78625	-1.43239	-1.75291	-1.8196	-1.49441	-1.37038	PF3D7_0103300	472	S	___1	SEEYEES(0.416)S(0.583)VKGDT(0.001)K	8	SLLKVKVKSEEYEESSVKGDTKDHFNYLNMF
PF3D7_1201100		RESA-like protein with PHIST and DnaJ domains	0.353717	-1.18668	-0.83296	-1.14076	-1.2326	-0.868299	-0.797621	PF3D7_1201100	462	S	___1	S(0.542)ES(0.45)EKS(0.008)LDISK	1	NNSKYVFDYGSFEEKSESEKSLDISKNFIFS
PF3D7_0606000	KIC1	conserved Plasmodium protein, unknown function	0.353513	1.13078	1.4843	1.2151	1.04646	1.48351	1.48508	PF3D7_0606000	476	S	___2	NTDVDKS(0.007)DES(0.993)PLS(1)EQNAEIDNHNVLINR	13	YNRNTDVDKSDESPLSEQNAEIDNHNVLINR
PF3D7_1107300	PAIP1	polyadenylate-binding protein-interacting protein 1, putative	0.353468	0.822078	1.17555	0.88884	0.755316	1.24824	1.10285	PF3D7_1107300	1075	T	___1	REGYNS(0.032)EDNDNT(0.937)AGNY(0.026)Y(0.005)LK	12	KGVKREGYNSEDNDNTAGNYYLKNGNPIMNV
PF3D7_1242700		40S ribosomal protein S17, putative	0.353427	0.660488	1.01392	0.757961	0.563015	0.99225	1.03558	PF3D7_1242700	89	S	___1	RLDFVPEKS(1)QIDVSVIYVEPDTLR	9	QEEERERRLDFVPEKSQIDVSVIYVEPDTLR
PF3D7_0702500		Plasmodium exported protein, unknown function	0.353308	-0.793933	-0.440625	-0.71175	-0.876116	-0.45842	-0.422831	PF3D7_0702500	124	S	___1	NGFDLNDDTT(0.004)NS(0.004)NNLGEGT(0.222)HS(0.769)AVHNLDGQK	21	NDDTTNSNNLGEGTHSAVHNLDGQKESQLYK
PF3D7_0627800	ACS	acetyl-CoA synthetase, putative	0.352828	1.54763	1.90046	1.55648	1.53878	1.91623	1.88469	PF3D7_0627800	456	S	___1	ISYSEKS(0.999)YS(0.001)K	7	TKNNPINHKISYSEKSYSKELINTDMVNNDN
PF3D7_1471400		diacylglycerol kinase, putative	0.352392	-0.306911	0.0454807	-0.0866985	-0.527124	0.0468006	0.0441608	PF3D7_1471400	83	S	___1	S(0.003)FS(0.996)MT(0.002)NDKITCGNEK	3	ESKGFSASSLNNKSFSMTNDKITCGNEKKEM
PF3D7_0923400		conserved Plasmodium protein, unknown function	0.352273	1.6854	2.03768	1.67795	1.69286	1.94032	2.13503	PF3D7_0923400	77	S	___2	TQS(0.005)YRS(0.995)YEYK	6	IYEDNYSRGKTQSYRSYEYKLEHIMKKKEEY
PF3D7_1107800	ApiAP2	AP2 domain transcription factor, putative	0.351627	1.3621	1.71373	1.44666	1.27753	1.62498	1.80247	PF3D7_1107800	1363	S	___2	VS(0.005)MNDS(0.996)ELS(1)LNNHDNNNDVIINNNMHGGK	6	YDYNTDYNSKVSMNDSELSLNNHDNNNDVII
PF3D7_1107800	ApiAP2	AP2 domain transcription factor, putative	0.351627	1.3621	1.71373	1.44666	1.27753	1.62498	1.80247	PF3D7_1107800	1366	S	___2	VS(0.01)MNDS(0.99)ELS(1)LNNHDNNNDVIINNNMHGGK	9	NTDYNSKVSMNDSELSLNNHDNNNDVIINNN
PF3D7_1141400	PIGH	phosphatidylinositol N-acetylglucosaminyltransferase subunit H, putative	0.351583	-0.672942	-0.32136	-0.70677	-0.639114	-0.27713	-0.365589	PF3D7_1141400	319	S	___1	LLNFS(0.078)S(0.887)Y(0.036)ENIK	6	CSSSEENIFKLLNFSSYENIKINKRSKKLRK
PF3D7_0918900	gammaGCS	gamma-glutamylcysteine synthetase	0.351377	0.258927	0.610305	0.22633	0.291525	0.63571	0.5849	PF3D7_0918900	309	T	___2	NKEKDNT(1)PR	7	VYDDEIENKNKEKDNTPRSCNDYNNVNDSSN
PF3D7_0619400		cell division cycle protein 48 homologue, putative	0.351377	-0.205643	0.145735	-0.27071	-0.140575	0.10623	0.18524	PF3D7_0619400	773	S	___1	S(0.993)VS(0.007)QADLIK	1	ITRHHFKEGLAGARRSVSQADLIKYDNFRIK
PF3D7_0401800	PfD80	Plasmodium exported protein (PHISTb), unknown function	0.351333	3.30211	3.65344	3.41901	3.18521	3.55683	3.75005	PF3D7_0401800	62	S	___2	SS(0.001)S(0.998)CS(0.001)S(0.001)LASTTK	3	NLSEEKAEDDYKKSSSCSSLASTTKRSPSTA
PF3D7_1142100		conserved Plasmodium protein, unknown function	0.351263	-0.288287	0.0629759	-0.16613	-0.410444	0.093111	0.0328407	PF3D7_1142100	494	T	___2	ENNCEY(0.001)T(0.995)DVDET(0.014)S(0.013)NVFNNLS(0.977)DNYIK	7	YANEFSHVKENNCEYTDVDETSNVFNNLSDN
PF3D7_0504700	CEP120	centrosomal protein CEP120, putative	0.351102	-2.46157	-2.11047	-2.29604	-2.6271	-2.18853	-2.0324	PF3D7_0504700	513	S	___2	S(1)IS(1)PEQVEDQQNDIIDKIK	1	EINESERYLTFQTSRSISPEQVEDQQNDIID
PF3D7_0504700	CEP120	centrosomal protein CEP120, putative	0.351102	-2.46157	-2.11047	-2.29604	-2.6271	-2.18853	-2.0324	PF3D7_0504700	515	S	___2	S(1)IS(1)PEQVEDQQNDIIDKIK	3	NESERYLTFQTSRSISPEQVEDQQNDIIDKI
PF3D7_1408200	ApiAP2	AP2 domain transcription factor AP2-G2, putative	0.351089	-0.361953	-0.0108643	-0.37459	-0.349316	-0.0446892	0.0229607	PF3D7_1408200	45	S	___1	NLCENNS(1)DIVEK	7	DIESNDDKKNLCENNSDIVEKMKGNYEYKDD
PF3D7_1022400	SRSF4	serine/arginine-rich splicing factor 4	0.351028	-0.0944529	0.256576	-0.17507	-0.0138359	0.161871	0.35128	PF3D7_1022400	415	S	___1	SNDRLS(1)ESK	6	SSRELKSQDKSNDRLSESKKSYKSQSASVRY
PF3D7_0702400	SEMP1	small exported membrane protein 1	0.350988	1.39359	1.74458	1.38859	1.39858	1.68909	1.80006	PF3D7_0702400	2	S	___1	S(1)QPQKQQNEEGAATAANTQEK	1	______________MSQPQKQQNEEGAATAA
PF3D7_1468800	U2AF2	splicing factor U2AF large subunit, putative	0.350862	2.66172	3.01258	2.74924	2.57421	3.04154	2.98363	PF3D7_1468800	246	S	___1	TIEVHS(1)NS(1)EENKQEK	8	DRYLNKRKTIEVHSNSEENKQEKRRTKSRER
PF3D7_0104800	NPT1	novel putative transporter 1, putative	0.350758	-3.6403	-3.28954	-3.47916	-3.80144	-3.33824	-3.24084	PF3D7_0104800	262	S	___1	S(0.545)RS(0.72)S(0.676)NNIY(0.017)T(0.042)NEEDEFHFK	4	NETTKHTNAEGRSRSSNNIYTNEEDEFHFKN
PF3D7_0708400	HSP90	heat shock protein 90	0.350528	-4.78591	-4.43538	-5.09079	-4.48104	-4.3567	-4.51407	PF3D7_0708400	733	T	___1	LGLS(0.002)IDEEENNDIDLPPLEET(0.916)VDAT(0.067)DS(0.014)K	21	DEEENNDIDLPPLEETVDATDSKMEEVD___
PF3D7_1321700	SF1	splicing factor 1	0.350388	1.69737	2.04776	1.71462	1.68011	2.01355	2.08196	PF3D7_1321700	27	S	___2	EDKINGS(0.961)S(0.02)S(0.02)NKDELIENK	7	KLFEIKNSKEDKINGSSSNKDELIENKELKN
PF3D7_1321700	SF1	splicing factor 1	0.350388	1.69737	2.04776	1.71462	1.68011	2.01355	2.08196	PF3D7_1321700	28	S	___2	EDKINGS(0.667)S(0.667)S(0.667)NKDELIENK	8	LFEIKNSKEDKINGSSSNKDELIENKELKND
PF3D7_0506500		conserved Plasmodium protein, unknown function	0.350318	-2.37965	-2.02933	-2.48414	-2.27516	-2.07463	-1.98403	PF3D7_0506500	3740	S	___1	GS(1)MKGDEMVGSIK	2	KNNIKNEQLNGIYKGSMKGDEMVGSIKKPGR
PF3D7_0520900	SAHH	adenosylhomocysteinase	0.350248	0.845442	1.19569	0.62896	1.06192	1.52083	0.87055	PF3D7_0520900	474	S	___1	S(0.998)NEY(0.002)RY	1	NQCQFLGVNKSGPFKSNEYRY__________
PF3D7_0517300	SR1	serine/arginine-rich splicing factor 1	0.350037	-2.41472	-2.06468	-2.43662	-2.39281	-1.9503	-2.17906	PF3D7_0517300	121	S	___1	YVVEVTGLPIS(0.5)GS(0.5)WQDLKDHLR	11	SRRGRYVVEVTGLPISGSWQDLKDHLREAGE
PF3D7_0517300	SR1	serine/arginine-rich splicing factor 1	0.350037	-2.41472	-2.06468	-2.43662	-2.39281	-1.9503	-2.17906	PF3D7_0517300	123	S	___1	YVVEVTGLPIS(0.5)GS(0.5)WQDLKDHLR	13	RGRYVVEVTGLPISGSWQDLKDHLREAGECG
PF3D7_1415600		conserved Plasmodium protein, unknown function	0.350008	-0.338472	0.0115356	-0.34454	-0.332405	-0.0386295	0.0617008	PF3D7_1415600	523	S	___2	Y(0.007)NS(0.993)EDS(0.923)IT(0.078)CEDDKHILK	3	IYKGVTCFDDILKYNSEDSITCEDDKHILKN
PF3D7_1415600		conserved Plasmodium protein, unknown function	0.350008	-0.338472	0.0115356	-0.34454	-0.332405	-0.0386295	0.0617008	PF3D7_1415600	526	S	___2	Y(0.209)NS(0.792)EDS(0.995)IT(0.004)CEDDKHILK	6	GVTCFDDILKYNSEDSITCEDDKHILKNLNN
PF3D7_0408500	FEN1	flap endonuclease 1	0.350007	-0.128157	0.22185	-0.0554485	-0.200865	0.15015	0.29355	PF3D7_0408500	606	S	___2	S(0.033)NS(0.23)PLKEDS(0.774)PNS(0.822)Y(0.141)NNIK	12	DTLKSNSPLKEDSPNSYNNIKNNNHTININS
PF3D7_1225200		conserved Plasmodium protein, unknown function	0.349723	-3.24814	-2.89841	-3.30088	-3.1954	-2.88688	-2.90995	PF3D7_1225200	784	S	___1	ES(1)IRHNSK	2	NKLEWNNNEHIQTKESIRHNSKSPNYYNNYN
PF3D7_0102200	RESA	ring-infected erythrocyte surface antigen	0.349516	-2.53312	-2.18361	-2.50065	-2.56559	-2.37364	-1.99357	PF3D7_0102200	313	S	___1	HINELKS(1)LEHR	7	MNSDISSFKHINELKSLEHRAAKAAEAEMKK
PF3D7_0903700		alpha tubulin 1	0.349087	-0.249442	0.0996447	-0.452869	-0.0460148	0.12801	0.0712795	PF3D7_0903700	287	S	___1	AYHEQLS(0.965)VS(0.035)EITNSAFEPANMMAK	7	YAPVVSAEKAYHEQLSVSEITNSAFEPANMM
PF3D7_0817300		conserved Plasmodium protein, unknown function	0.349068	-2.76875	-2.41968	-2.66192	-2.87559	-2.51669	-2.32268	PF3D7_0817300	131	Y	___2	SQDENFLHAEVS(0.722)S(0.514)NEY(0.764)K	16	SQDENFLHAEVSSNEYKDANNDSSDEEDDEY
PF3D7_1033600	CEF1	myb2 transcription factor, putative	0.348963	-1.03169	-0.682725	-0.94257	-1.12081	-0.59988	-0.76557	PF3D7_1033600	517	S	___1	NIS(1)LYAHSIISYK	3	KNKIISDIKSFKKNISLYAHSIISYKNLKND
PF3D7_1326700		conserved Apicomplexan protein, unknown function	0.348302	-0.319072	0.0292301	-0.170069	-0.468075	-0.00412941	0.0625896	PF3D7_1326700	193	S	___2	S(0.001)DIS(0.026)IS(0.816)S(0.157)EINK	6	LNRKSNTSQKSDISISSEINKSGSTSRININ
PF3D7_1136600		conserved Plasmodium protein, unknown function	0.348268	-3.00539	-2.65712	-2.88838	-3.1224	-2.62481	-2.68943	PF3D7_1136600	1156	S	___1	KDVEDVFS(0.73)DLDIES(0.067)S(0.067)NNS(0.067)T(0.067)NQLDNK	8	NNNISKGKKDVEDVFSDLDIESSNNSTNQLD
PF3D7_1212400		tetratricopeptide repeat protein, putative	0.348248	0.621067	0.969316	0.67462	0.567514	1.05222	0.88641	PF3D7_1212400	131	S	___1	NLNNNITDIKLS(1)DDDKETK	12	INKKNLNNNITDIKLSDDDKETKDDANEKYN
PF3D7_1219000	FRM2	formin 2	0.348168	-0.319423	0.0287457	-0.30744	-0.331406	-0.0374794	0.0949707	PF3D7_1219000	1020	S	___1	VSS(0.001)VFS(0.999)PR	6	NFPLKNQIKKVSSVFSPRTINSNSSCKSISF
PF3D7_0209100	PATPL1	phospholipase A2, putative	0.348037	0.933873	1.28191	0.966581	0.901165	1.27751	1.28631	PF3D7_0209100	36	S	___2	QVYS(0.983)GS(0.017)ETQNAENEYSK	4	DDEKDDSYEREKQVYSGSETQNAENEYSKLR
PF3D7_1004200		WD repeat-containing protein, putative	0.347803	-2.23372	-1.88591	-2.14913	-2.31831	-1.91277	-1.85906	PF3D7_1004200	2075	S	___1	SNYNNNDDDKNS(0.5)S(0.5)KEK	13	KSKSNYNNNDDDKNSSKEKNNTCIDMITNKD
PF3D7_1004400		RNA-binding protein, putative	0.347782	-0.00421238	0.34357	0.0260601	-0.0344849	0.3556	0.331539	PF3D7_1004400	737	S	___2	TKDELYDDIS(1)EIKLQEGS(1)VCR	10	NEKKGKTKDELYDDISEIKLQEGSVCRSTKD
PF3D7_1430300		acid phosphatase, putative	0.347768	2.34849	2.69626	2.52478	2.1722	2.67166	2.72086	PF3D7_1430300	2216	S	___1	NNINCVITTNNCYS(1)DREEK	14	DKNNINCVITTNNCYSDREEKGNFVSAEGVS
PF3D7_1002200	PArt	tryptophan-rich antigen 3	0.347672	1.00256	1.35023	1.09886	0.906256	1.31035	1.39011	PF3D7_1002200	720	S	___1	RYS(1)ILTNR	3	KPRTFEKKIEKCRRYSILTNRENRTYLSNWN
PF3D7_1445700		conserved Plasmodium protein, unknown function	0.347652	1.15434	1.502	1.12908	1.17961	1.39101	1.61298	PF3D7_1445700	350	S	___1	AFPS(0.003)LT(0.135)S(0.862)K	7	DPPNINDTRAFPSLTSK______________
PF3D7_0515700	GAP40	glideosome-associated protein 40, putative	0.347593	-4.86736	-4.51976	-4.6352	-5.09951	-4.40059	-4.63894	PF3D7_0515700	420	S	___2	GTSHMDSSSNQTSHGVIS(1)ADEGRGEHSR	18	SHMDSSSNQTSHGVISADEGRGEHSRAATFK
PF3D7_1227700	KIC2	conserved Plasmodium protein, unknown function	0.347498	0.998628	1.34613	0.943771	1.05348	1.30746	1.38479	PF3D7_1227700	681	S	___1	NITIGS(1)LADTEK	6	VYTSKKSYDKNITIGSLADTEKRSIKIKNII
PF3D7_1347200	NT1	nucleoside transporter 1	0.347458	-0.987157	-0.639699	-0.980509	-0.993805	-0.743189	-0.536209	PF3D7_1347200	16	S	___2	AYADIES(1)R	7	MSTGKESSKAYADIESRGDYKDDGKKGSTLS
PF3D7_1142300		conserved Plasmodium membrane protein, unknown function	0.347447	-2.22162	-1.87417	-2.07958	-2.36366	-1.88126	-1.86708	PF3D7_1142300	916	S	___1	ET(0.007)MGNQS(0.993)MENNNK	7	SVCSENSLKETMGNQSMENNNKINNENNNDV
PF3D7_0113000	GARP	glutamic acid-rich protein	0.347357	5.70683	6.05419	5.82209	5.59158	5.9776	6.13078	PF3D7_0113000	172	S	___1	KKEENSEVMS(1)LYK	10	KHKKDKKKEENSEVMSLYKTGQHKPKNATEH
PF3D7_0904600		ubiquitin specific protease, putative	0.347233	-3.94763	-3.60039	-3.66735	-4.22791	-3.59649	-3.6043	PF3D7_0904600	278	S	___2	NNNINSTVNYDNTNTEENIT(0.131)S(0.869)DHCNIKDDTR	21	STVNYDNTNTEENITSDHCNIKDDTRLEKDM
PF3D7_1466800		conserved Plasmodium protein, unknown function	0.347183	-0.799067	-0.451884	-0.84598	-0.752155	-0.462219	-0.441549	PF3D7_1466800	867	S	___1	NPVNTSSNTNDS(0.001)T(0.002)NNES(0.819)S(0.178)YELTVK	17	PVNTSSNTNDSTNNESSYELTVKDLIYVTYS
PF3D7_0529400		conserved Plasmodium protein, unknown function	0.347148	-2.26325	-1.9161	-2.23977	-2.28673	-1.98947	-1.84273	PF3D7_0529400;PF3D7_0529400.2-p1	1048;968	S	___1	HEDIPNIAS(0.988)CVVPLS(0.019)DES(0.992)LKES(0.001)LEK	18	DIPNIASCVVPLSDESLKESLEKSKESLSGG
PF3D7_0206300	AROM	pentafunctional AROM polypeptide, putative, pseudogene	0.347097	1.28265	1.62975	1.3339	1.2314	1.62485	1.63464	PF3D7_0206300	741	S	___1	TNIININENSIYLIDS(0.58)S(0.42)DKENDRPMSSK	16	TNIININENSIYLIDSSDKENDRPMSSKRKR
PF3D7_0803100	UTP14	U3 small nucleolar RNA-associated protein 14, putative	0.346932	-1.57969	-1.23276	-1.44166	-1.71773	-1.11915	-1.34637	PF3D7_0803100	883	S	___3	LS(0.794)DY(0.163)S(0.042)HKELS(0.001)K	2	KNDEESHILFSNNKLSDYSHKELSKAKKELK
PF3D7_0803100	UTP14	U3 small nucleolar RNA-associated protein 14, putative	0.346932	-1.57969	-1.23276	-1.44166	-1.71773	-1.11915	-1.34637	PF3D7_0803100	886	S	___3	LS(0.027)DY(0.002)S(0.971)HKELSK	5	EESHILFSNNKLSDYSHKELSKAKKELKNDI
PF3D7_0803100	UTP14	U3 small nucleolar RNA-associated protein 14, putative	0.346932	-1.57969	-1.23276	-1.44166	-1.71773	-1.11915	-1.34637	PF3D7_0803100	891	S	___3	NDEES(0.671)HILFS(0.717)NNKLS(0.717)DY(0.947)S(0.95)HKELS(0.997)K	23	LFSNNKLSDYSHKELSKAKKELKNDIDFVNS
PF3D7_0803100	UTP14	U3 small nucleolar RNA-associated protein 14, putative	0.346932	-1.57969	-1.23276	-1.44166	-1.71773	-1.11915	-1.34637	PF3D7_0803100	878	S	___3	NDEES(0.671)HILFS(0.717)NNKLS(0.717)DY(0.947)S(0.95)HKELS(0.997)K	10	SDEIIKNDEESHILFSNNKLSDYSHKELSKA
PF3D7_0803100	UTP14	U3 small nucleolar RNA-associated protein 14, putative	0.346932	-1.57969	-1.23276	-1.44166	-1.71773	-1.11915	-1.34637	PF3D7_0803100	885	Y	___3	NDEES(0.671)HILFS(0.717)NNKLS(0.717)DY(0.947)S(0.95)HKELS(0.997)K	17	DEESHILFSNNKLSDYSHKELSKAKKELKND
PF3D7_1212700	EIF3A	eukaryotic translation initiation factor 3 subunit A, putative	0.346908	0.717288	1.0642	0.692591	0.741985	1.11131	1.01708	PF3D7_1212700	1050	S	___1	GGSQNGDDS(1)YRR	9	TWRRGDKGGSQNGDDSYRRHDDHHDGTHRDR
PF3D7_1328500		alpha/beta-hydrolase, putative	0.346753	0.445698	0.792451	0.446321	0.445074	0.807571	0.77733	PF3D7_1328500	907	S	___1	ADYTQANLY(0.002)NS(0.995)EDY(0.003)SNQTCNK	11	QSYEKADYTQANLYNSEDYSNQTCNKFFENS
PF3D7_1401500		esterase, putative	0.346437	-0.550297	-0.203859	-0.608599	-0.491995	-0.0388794	-0.368839	PF3D7_1401500	71	S	___1	QNVEVIS(1)NDKAILK	7	GHVRLQYLRQNVEVISNDKAILKDQDNYYVY
PF3D7_1238500		conserved Plasmodium protein, unknown function	0.346416	0.203979	0.550395	0.283241	0.124716	0.57217	0.52862	PF3D7_1238500	966	S	___2	TISDNRS(0.999)DNMS(1)DYVQK	7	VDMSDNMARTISDNRSDNMSDYVQKETLKEE
PF3D7_1238500		conserved Plasmodium protein, unknown function	0.346416	0.203979	0.550395	0.283241	0.124716	0.57217	0.52862	PF3D7_1238500	970	S	___2	TISDNRS(0.999)DNMS(1)DYVQK	11	DNMARTISDNRSDNMSDYVQKETLKEERRDI
PF3D7_0603400	TEX1	trophozoite exported protein 1	0.346329	-0.568783	-0.222454	-0.49493	-0.642635	-0.264479	-0.180429	PF3D7_0603400	7	S	___1	RS(0.821)KNENDES(0.06)T(0.06)S(0.06)LPLENSELLIEYIHNLK	2	_________MSNKKRSKNENDESTSLPLENS
PF3D7_1106800	pTKL	protein kinase, putative	0.346283	1.00404	1.35033	1.05929	0.948795	1.29754	1.40311	PF3D7_1106800	528	S	___1	GICS(0.986)DS(0.014)IFYK	4	NGEYYLINHLSKGICSDSIFYKSSQSKSSSQ
PF3D7_1132600	PRP38A	pre-mRNA-splicing factor 38A, putative	0.346257	2.6769	3.02316	2.69599	2.65781	2.98819	3.05813	PF3D7_1132600	193	S	___1	ALLNIS(1)S(1)DNELFK	7	QRKNLEYYKALLNISSDNELFKNNEDTTHNK
PF3D7_1445900	DDX5	ATP-dependent RNA helicase DDX5, putative	0.346192	-1.25351	-0.907314	-1.50344	-1.00357	-0.551949	-1.26268	PF3D7_1445900	88	T	___1	LS(0.244)T(0.756)KEVK	3	EKNFYKEHEDISKLSTKEVKEIRDKHKITIL
PF3D7_0923400		conserved Plasmodium protein, unknown function	0.346073	0.473773	0.819846	0.529041	0.418505	0.898401	0.741291	PF3D7_0923400	298	S	___1	EYIS(0.004)Y(0.016)ES(0.589)S(0.695)T(0.695)KR	8	KNYIMSRKEYISYESSTKRRRSNNNNVISHY
PF3D7_1321700	SF1	splicing factor 1	0.345618	-3.98388	-3.63826	-4.04339	-3.92438	-3.80684	-3.46969	PF3D7_1321700	5	S	___1	MEENS(0.546)Y(0.454)FEAVEK	5	___________MEENSYFEAVEKLFEIKNSK
PF3D7_1004400		RNA-binding protein, putative	0.345563	4.65703	5.00259	4.7717	4.54236	5.02646	4.97873	PF3D7_1004400	685	S	___1	GGDENIS(1)LK	7	TDIIDEKEKGGDENISLKNYKNKKENVDHDY
PF3D7_1219600	ATPase2	aminophospholipid-transporting P-ATPase	0.345463	3.23543	3.5809	3.41597	3.0549	3.5315	3.63029	PF3D7_1219600	548	S	___1	EIPNIPKDDIS(1)S(1)DADVIK	12	GEQKEIPNIPKDDISSDADVIKRMRTKKIAD
PF3D7_0303100		conserved Plasmodium protein, unknown function	0.345358	0.420833	0.766191	0.46833	0.373335	0.706741	0.82564	PF3D7_0303100	1119	S	___1	DDQNLKS(1)EGEEK	7	EEEIKNMDKDDQNLKSEGEEKNLLSPLSNNV
PF3D7_1334300	MSRP5	MSP7-like protein	0.345237	-1.9887	-1.64346	-1.9036	-2.0738	-1.56126	-1.72566	PF3D7_1334300	80	S	___1	RKS(0.994)DNT(0.006)LGK	3	IELLKKKVDDLEKRKSDNTLGKRQKKEDDDD
PF3D7_1223100	PKAr	cAMP-dependent protein kinase regulatory subunit	0.345073	3.23456	3.57964	3.10992	3.35921	3.79503	3.36424	PF3D7_1223100	83	S	___1	TDS(1)EILDGLDYSEMSK	3	SKKPSKTKIPITKTDSEILDGLDYSEMSKQV
PF3D7_1410400	RAP1	rhoptry-associated protein 1	0.345057	1.10563	1.45069	1.00302	1.20823	1.46136	1.44001	PF3D7_1410400	181	S	___1	RS(0.594)AS(0.406)VAGIVGADEEAPPAPK	2	ESNSSEESTTKSSKRSASVAGIVGADEEAPP
PF3D7_1308200	cpsSII	carbamoyl phosphate synthetase	0.344443	-1.60816	-1.26372	-1.60907	-1.60726	-1.19871	-1.32873	PF3D7_1308200	1544	S	___1	QKS(0.938)IS(0.056)NKNPGNS(0.006)YYVVDSVYNNEYK	3	IGNNKNMDMYLSKQKSISNKNPGNSYYVVDS
PF3D7_1366300		conserved Plasmodium protein, unknown function	0.344294	-0.713118	-0.368824	-0.66843	-0.757805	-0.340519	-0.397129	PF3D7_1366300	404	S	___2	HYRES(1)K	5	NDEISNNQEEKHYRESKNVSENIQEESITKE
PF3D7_1366300		conserved Plasmodium protein, unknown function	0.344294	-0.713118	-0.368824	-0.66843	-0.757805	-0.340519	-0.397129	PF3D7_1366300	408	S	___2	NVS(1)ENIQEESITK	3	SNNQEEKHYRESKNVSENIQEESITKEHISS
PF3D7_1243400		conserved Plasmodium protein, unknown function	0.344248	-2.40539	-2.06114	-2.5825	-2.22828	-2.05244	-2.06984	PF3D7_1243400	287	S	___1	NS(1)YQS(1)ICNNYTEHLNFK	2	DMMLKKYTHKKKKKNSYQSICNNYTEHLNFK
PF3D7_1478600	PTP3	EMP1-trafficking protein;Plasmodium exported protein (hyp17), unknown function, pseudogene	0.343483	2.82639	3.16987	2.77467	2.87811	3.08163	3.25811	PF3D7_1478600;PF3D7_1477000	1030;775	S	___1	GIDDEES(0.682)S(0.318)NKGK	7	NKIAKTVLKGIDDEESSNKGKNENKKKKKKD
PF3D7_0603500	CAX	cation/H+ antiporter	0.343058	0.239303	0.58236	0.208941	0.269665	0.577761	0.58696	PF3D7_0603500	10	S	___1	AT(0.001)S(0.999)YVR	3	______MVMGRVRATSYVRRTISQPLNKNVP
PF3D7_1224400		conserved Plasmodium protein, unknown function	0.342967	-0.341317	0.00164986	-0.145069	-0.537565	-0.0729694	0.0762691	PF3D7_1224400	198	S	___2	FHS(1)DDS(1)NEFNYVDEKEDENLIR	6	TYGNYLNEEKFHSDDSNEFNYVDEKEDENLI
PF3D7_1225700		VAC14 domain-containing protein, putative	0.342802	-0.942212	-0.59941	-0.896229	-0.988195	-0.68512	-0.5137	PF3D7_1225700	786	S	___1	NES(0.91)S(0.09)IIK	3	LVNKHENISNKGRNESSIIKSKHDEDNENDY
PF3D7_0507600	CAF40	cell differentiation protein, putative	0.342562	-1.31588	-0.97332	-1.28	-1.35176	-1.08689	-0.859751	PF3D7_0507600	566	S	___2	TDTHTNIHNINDNIENS(0.527)S(0.527)S(0.527)QS(0.42)FNNK	17	DTHTNIHNINDNIENSSSQSFNNKINDTNLK
PF3D7_0507600	CAF40	cell differentiation protein, putative	0.342562	-1.31588	-0.97332	-1.28	-1.35176	-1.08689	-0.859751	PF3D7_0507600	567	S	___2	TDTHTNIHNINDNIENS(0.527)S(0.527)S(0.527)QS(0.42)FNNK	18	THTNIHNINDNIENSSSQSFNNKINDTNLKC
PF3D7_0903500	NUP138	conserved Plasmodium protein, unknown function	0.342442	-0.678206	-0.335765	-0.657309	-0.699104	-0.357599	-0.313931	PF3D7_0903500	1109	T	___1	NIS(0.105)PT(0.799)Y(0.096)NQQLNK	5	LFLQGNFFNSKNISPTYNQQLNKDQDKMTKN
PF3D7_0812500		RNA-binding protein, putative	0.341408	1.37407	1.71548	1.4343	1.31384	1.66088	1.77007	PF3D7_0812500	921	S	___1	NHDS(1)PYER	4	DKYDKKVKTNNKNHDSPYERNSVSISKDSYT
PF3D7_1414500	ABCk2	atypical protein kinase, ABC-1 family, putative	0.341173	-1.41508	-1.0739	-1.47185	-1.3583	-1.13832	-1.00949	PF3D7_1414500	468	S	___1	SFSFVDY(0.005)S(0.027)LNQDVDS(0.938)DKMNQEDY(0.03)EY(0.001)ILK	15	KSFSFVDYSLNQDVDSDKMNQEDYEYILKEN
PF3D7_0729100		conserved Plasmodium protein, unknown function	0.340472	-1.10365	-0.763175	-1.10008	-1.10722	-0.78418	-0.74217	PF3D7_0729100	1169	S	___1	YNEVEINGS(1)EKNNFVDNTK	9	DFNKKQKYNEVEINGSEKNNFVDNTKEMFEY
PF3D7_0609700	KIC6	conserved Plasmodium protein, unknown function	0.340222	2.49441	2.83463	2.59882	2.39	2.75884	2.91042	PF3D7_0609700	1103	S	___2	Y(0.036)EKKS(0.964)DVS(1)DFTFNK	8	SNSVVNIKYEKKSDVSDFTFNKYKNVRDDEE
PF3D7_0922500	PGK	phosphoglycerate kinase	0.339978	-2.04306	-1.70308	-2.20676	-1.87937	-1.89845	-1.50772	PF3D7_0922500	255	S	___1	IGT(0.173)S(0.823)LFDEAGS(0.004)K	4	AYTFKKVLNNMKIGTSLFDEAGSKIVGEIME
PF3D7_1120000		conserved Plasmodium protein, unknown function	0.339852	-0.884168	-0.544315	-0.86623	-0.902105	-0.69656	-0.392071	PF3D7_1120000	1047	S	___1	NIS(1)DVS(1)DIEKNVPK	3	EEEIDELDDTEEKNISDVSDIEKNVPKNFIF
PF3D7_0904100		AP-4 complex subunit epsilon, putative	0.339593	-2.75708	-2.41748	-2.91075	-2.6034	-2.39783	-2.43714	PF3D7_0904100	602	S	___1	NDDVNNS(1)DMQIDLQK	7	IKHEQKKNKNDDVNNSDMQIDLQKKKKNKMN
PF3D7_1359900		conserved Plasmodium membrane protein, unknown function	0.339453	0.284018	0.62347	0.3668	0.201235	0.620241	0.626699	PF3D7_1359900	41	S	___1	DIS(0.991)KENILFLY(0.009)DK	3	TKSSNTTNFKKLRDISKENILFLYDKKVEHL
PF3D7_1303500	NHE	sodium/hydrogen exchanger, Na+, H+ antiporter	0.339437	-1.82654	-1.4871	-1.96171	-1.69136	-1.59086	-1.38334	PF3D7_1303500	1337	S	___1	T(0.109)IS(0.891)VDALYNDDDKKK	3	IIKKNMKSNENIKTISVDALYNDDDKKKKIS
PF3D7_0616900		conserved Plasmodium protein, unknown function	0.339387	2.81848	3.15787	2.90968	2.72729	3.15134	3.1644	PF3D7_0616900	580	S	___1	NKEYS(1)DDDLFSLSR	5	NNEPKEEEHVKNKEYSDDDLFSLSREKDKEL
PF3D7_0614300	MFR1	major facilitator superfamily-related transporter, putative	0.338742	2.04025	2.37899	2.02154	2.05897	2.39744	2.36055	PF3D7_0614300	32	S	___2	KYEGEFLKS(1)NTTEMK	9	LRKNESKKYEGEFLKSNTTEMKGRKVVSKID
PF3D7_0614300	MFR1	major facilitator superfamily-related transporter, putative	0.338742	2.04025	2.37899	2.02154	2.05897	2.39744	2.36055	PF3D7_0614300	35	T	___2	KY(0.001)EGEFLKS(0.871)NT(0.232)T(0.896)EMK	12	NESKKYEGEFLKSNTTEMKGRKVVSKIDENI
PF3D7_0113000	GARP	glutamic acid-rich protein	0.338597	1.72118	2.05978	1.83804	1.60432	1.94251	2.17705	PF3D7_0113000	82	T	___1	DEKDDVPT(0.123)T(0.78)S(0.097)NDNLK	9	TLLKEEKDEKDDVPTTSNDNLKNAHNNNEIS
PF3D7_1438400	MCA2	metacaspase-like protein	0.338527	3.44974	3.78827	3.45612	3.44336	3.71567	3.86086	PF3D7_1438400	51	S	___2	ILVKES(1)ENDRNES(1)IQK	6	ANISCDSKGRILVKESENDRNESIQKKQMLS
PF3D7_1438400	MCA2	metacaspase-like protein	0.338527	3.44974	3.78827	3.45612	3.44336	3.71567	3.86086	PF3D7_1438400	58	S	___2	ILVKES(1)ENDRNES(1)IQK	13	KGRILVKESENDRNESIQKKQMLSSMDNRKT
PF3D7_1321700	SF1	splicing factor 1	0.338443	-3.11165	-2.77321	-3.35142	-2.87189	-2.79709	-2.74933	PF3D7_1321700	172	S	___3	ADT(1)LKEES(1)DVS(1)DNHHNNRK	8	HENIPKNKADTLKEESDVSDNHHNNRKSKNI
PF3D7_1321700	SF1	splicing factor 1	0.338443	-3.11165	-2.77321	-3.35142	-2.87189	-2.79709	-2.74933	PF3D7_1321700	175	S	___3	ADT(1)LKEES(1)DVS(1)DNHHNNRK	11	IPKNKADTLKEESDVSDNHHNNRKSKNIKNS
PF3D7_1321700	SF1	splicing factor 1	0.338443	-3.11165	-2.77321	-3.35142	-2.87189	-2.79709	-2.74933	PF3D7_1321700	167	T	___3	ADT(1)LKEES(1)DVS(1)DNHHNNRK	3	SDEDKHENIPKNKADTLKEESDVSDNHHNNR
PF3D7_1346400		conserved Plasmodium protein, unknown function	0.338423	-2.10118	-1.76276	-2.15923	-2.04313	-1.74151	-1.78401	PF3D7_1346400	3544	S	___1	CDS(0.98)GS(0.02)VELEYK	3	TSEQMNSLNDFSRCDSGSVELEYKNMSVKSK
PF3D7_0108300	ARP	conserved Plasmodium protein, unknown function	0.338278	-3.0899	-2.75162	-3.31687	-2.86294	-2.73089	-2.77236	PF3D7_0108300	1217	S	___2	GHT(0.003)VDS(0.997)ELT(0.001)TEDPVIQK	6	NNDNINNVARGHTVDSELTTEDPVIQKKGVC
PF3D7_0108300	ARP	conserved Plasmodium protein, unknown function	0.338278	-3.0899	-2.75162	-3.31687	-2.86294	-2.73089	-2.77236	PF3D7_0108300	1220	T	___2	GHT(0.228)VDS(0.756)ELT(0.877)T(0.139)EDPVIQK	9	NINNVARGHTVDSELTTEDPVIQKKGVCKDK
PF3D7_0302100	SRPK1	serine/threonine protein kinase	0.337712	-0.993962	-0.65625	-1.048	-0.939924	-0.6681	-0.6444	PF3D7_0302100	32	S	___2	LQYT(0.004)ES(0.996)DDEGSDEYCEGGYHPVK	6	SSSEDATSGKLQYTESDDEGSDEYCEGGYHP
PF3D7_0415900		60S ribosomal protein L15, putative	0.337573	-1.01118	-0.67361	-0.9893	-1.03307	-0.646059	-0.70116	PF3D7_0415900	109	S	___1	VGKS(1)ICGNLR	4	STRNLKSVAEGKVGKSICGNLRVLNSYWVGQ
PF3D7_1202500	TGS1	trimethylguanosine synthase, putative	0.337373	1.71876	2.05613	1.95174	1.48577	2.03207	2.08019	PF3D7_1202500	90	T	___1	NT(0.983)Y(0.009)RY(0.009)KMPVIFK	2	CRELHMLKSWELLKNTYRYKMPVIFKNLKDF
PF3D7_0830500	TryThrA	sporozoite and liver stage tryptophan-rich protein, putative	0.337268	-0.311462	0.0258055	-0.371689	-0.251236	0.00292015	0.0486908	PF3D7_0830500	100	T	___2	ELADAET(0.003)T(0.997)DT(0.039)S(0.958)DS(0.003)EDEDHIINKK	8	ITAAIASKELADAETTDTSDSEDEDHIINKK
PF3D7_1241200		conserved Plasmodium protein, unknown function	0.337148	-0.946322	-0.609175	-0.86104	-1.0316	-0.69611	-0.52224	PF3D7_1241200	2078	S	___1	ITNDTSEEKES(1)GNVQEDEEQLSCR	11	DNYIKITNDTSEEKESGNVQEDEEQLSCRNI
PF3D7_1002100	PTP5	EMP1-trafficking protein	0.336772	1.98701	2.32378	1.96128	2.01274	2.37005	2.27751	PF3D7_1002100	508	S	___1	GSS(0.999)EGETS(0.001)SNEK	3	SKYTMNLDSPLLKGSSEGETSSNEKQEESNV
PF3D7_0935900	REX1	ring-exported protein 1	0.336597	1.80434	2.14094	1.80728	1.8014	2.11778	2.1641	PF3D7_0935900	106	S	___1	MIEGNKS(1)GNGEEHNKHK	7	NEVNFEDKKMIEGNKSGNGEEHNKHKRRQVD
PF3D7_0316600	FNT	formate-nitrite transporter	0.336578	-2.40072	-2.06414	-2.09692	-2.70452	-2.17266	-1.95563	PF3D7_0316600	17	S	___1	S(1)VCGGEESYIR	1	PPNNSKYVLDPVSIKSVCGGEESYIRCVEYG
PF3D7_1353200	MAHRP2	membrane associated histidine-rich protein	0.336533	-1.88078	-1.54425	-2.04161	-1.71996	-1.49058	-1.59792	PF3D7_1353200	133	T	___2	S(0.004)T(0.005)S(0.005)DS(0.277)S(0.277)T(0.29)S(0.428)T(0.715)QQTL	9	ASKEQSKSTSDSSTSTQQTL___________
PF3D7_0401800	PfD80	Plasmodium exported protein (PHISTb), unknown function	0.336418	2.36523	2.70165	2.33217	2.39829	2.66069	2.74261	PF3D7_0401800	135	S	___2	S(1)AS(1)AASTTR	3	STASTASAASTTRSASAASTTRSASAASTTR
PF3D7_0617200		conserved Plasmodium protein, unknown function	0.336143	-1.80097	-1.46482	-1.77955	-1.82239	-1.52025	-1.4094	PF3D7_0617200	410	T	___1	DES(0.28)VKNVET(0.72)R	9	DMYEQKRDESVKNVETRREDLTNKIKEIDEK
PF3D7_1447900	MDR2	multidrug resistance protein 2	0.335988	3.97627	4.31226	3.99995	3.95259	4.34768	4.27683	PF3D7_1447900	231	S	___1	NLLDMNIS(1)YNKLNEK	8	EYLNLDYKNLLDMNISYNKLNEKINNDIINN
PF3D7_0714200		conserved Plasmodium protein, unknown function	0.335942	2.5305	2.86644	2.64223	2.41876	2.79944	2.93344	PF3D7_0714200	695	S	___2	S(0.001)IES(0.999)VAS(1)ENFEEWKK	4	QELNILKKRGSKSIESVASENFEEWKKNEEQ
PF3D7_0714200		conserved Plasmodium protein, unknown function	0.335942	2.5305	2.86644	2.64223	2.41876	2.79944	2.93344	PF3D7_0714200	698	S	___2	S(0.001)IES(0.999)VAS(1)ENFEEWKK	7	NILKKRGSKSIESVASENFEEWKKNEEQYPT
PF3D7_1107300	PAIP1	polyadenylate-binding protein-interacting protein 1, putative	0.335318	1.11971	1.45503	1.12479	1.11464	1.43968	1.47038	PF3D7_1107300	1967	S	___3	NDHKDES(0.066)S(0.934)VHS(0.962)FNS(0.033)S(0.005)R	8	YSKDSRKKNDHKDESSVHSFNSSRLNKKDNK
PF3D7_1107300	PAIP1	polyadenylate-binding protein-interacting protein 1, putative	0.335318	1.11971	1.45503	1.12479	1.11464	1.43968	1.47038	PF3D7_1107300	1970	S	___3	DESSVHS(1)FNSSR	7	DSRKKNDHKDESSVHSFNSSRLNKKDNKNDA
PF3D7_1107300	PAIP1	polyadenylate-binding protein-interacting protein 1, putative	0.335318	1.11971	1.45503	1.12479	1.11464	1.43968	1.47038	PF3D7_1107300	1973	S	___3	NDHKDESSVHS(0.998)FNS(0.973)S(0.028)RLNK	14	KKNDHKDESSVHSFNSSRLNKKDNKNDARHK
PF3D7_1238500		conserved Plasmodium protein, unknown function	0.335177	-1.08202	-0.74684	-1.18246	-0.981575	-0.67767	-0.81601	PF3D7_1238500	721	S	___1	NNS(1)FVHDNNK	3	ILLNLNNEGSTNKNNSFVHDNNKINECDNNG
PF3D7_0936800		Plasmodium exported protein (PHISTc), unknown function	0.335013	1.14802	1.48303	1.05847	1.23756	1.34903	1.61703	PF3D7_0936800	85	S	___1	NEEKS(1)LSDEINK	5	LRSHSTSDPKKNEEKSLSDEINKCDMKKYTA
PF3D7_0730900	PTP4	EMP1-trafficking protein	0.334903	0.370513	0.705416	0.429811	0.311214	0.696081	0.71475	PF3D7_0730900	1198	S	___1	S(0.166)FS(0.166)S(0.668)QGIR	4	MKGQKYGSKNVRSFSSQGIRQDFPYKNENNH
PF3D7_0905900	SEC27	coatomer subunit beta, putative	0.334892	0.0342731	0.369165	0.0120411	0.0565052	0.465731	0.2726	PF3D7_0905900	1004	S	___1	NINSYSINS(0.003)NQS(0.997)MDEELL	12	EDNKNINSYSINSNQSMDEELL_________
PF3D7_0501400	FIRA	interspersed repeat antigen	0.334873	3.2701	3.60498	3.28731	3.2529	3.53118	3.67877	PF3D7_0501400	683	S	___1	ASEGDNIS(1)LS(0.629)S(0.365)LS(0.006)EETQEK	8	QEHADEKKASEGDNISLSSLSEETQEKSHTK
PF3D7_1368600	TIM9	mitochondrial import inner membrane translocase subunit TIM9, putative	0.334764	-0.902058	-0.567294	-0.83857	-0.965546	-0.601389	-0.533199	PF3D7_1368600	13	S	___1	SLDLSAFNKS(1)DRDK	10	___MEKSLDLSAFNKSDRDKILKKINKAEYE
PF3D7_0401800	PfD80	Plasmodium exported protein (PHISTb), unknown function	0.334747	0.219823	0.55457	0.23871	0.200935	0.515991	0.593149	PF3D7_0401800	177	S	___3	SAST(0.002)AS(0.998)T(0.999)AS(0.999)AAS(0.001)AASTTR	9	STASTARSASTASTASAASAASTTRSASAAS
PF3D7_0525000		zinc finger protein, putative	0.334682	-0.234802	0.0998802	-0.1999	-0.269705	0.0263805	0.17338	PF3D7_0525000	658	S	___1	NQDNNMNDFKS(0.994)NENLQNAY(0.006)NK	11	IETTKNQDNNMNDFKSNENLQNAYNKLNNNS
PF3D7_0110600	PIP5K	phosphatidylinositol-4-phosphate 5-kinase	0.334677	0.306898	0.641575	0.450111	0.163685	0.65262	0.630529	PF3D7_0110600	1012	S	___1	DVPNIHNNNDDDGINCCTNLFKDDDT(0.025)LS(0.975)ALEK	28	GINCCTNLFKDDDTLSALEKNVTNNNLIKIM
PF3D7_1201000		Plasmodium exported protein (PHISTb), unknown function	0.334653	1.37401	1.70866	1.35845	1.38956	1.67775	1.73957	PF3D7_1201000	433	S	___1	IS(1)EEEDKQK	2	EIVQDVLQEFVEGKISEEEDKQKYAENLDDD
PF3D7_1438400	MCA2	metacaspase-like protein	0.334478	-0.573273	-0.238794	-0.63736	-0.509186	-0.326939	-0.15065	PF3D7_1438400	397	S	___1	TLS(1)NILK	3	LKSSPNTENTFNKTLSNILKEQPKRSSMFSF
PF3D7_0500800	MESA	mature parasite-infected erythrocyte surface antigen	0.334332	-1.54184	-1.20751	-1.58978	-1.49391	-1.38872	-1.0263	PF3D7_0500800	354	T	___1	VS(0.002)GPY(0.006)ENS(0.64)ENS(0.713)NVT(0.713)S(0.704)ES(0.175)EET(0.047)KK	14	NKVSGPYENSENSNVTSESEETKKLAEKEEN
PF3D7_1205900		conserved protein, unknown function	0.334233	4.08288	4.41711	4.12961	4.03614	4.43528	4.39894	PF3D7_1205900	11	S	___1	NNFNPDIS(1)DDDYVSEK	8	_____MLKNNFNPDISDDDYVSEKQIFQGSN
PF3D7_1410200	CTPS	cytidine triphosphate synthetase	0.333928	1.9315	2.26543	2.01258	1.85041	2.22787	2.30298	PF3D7_1410200	396	S	___2	YSYENFHENS(0.995)S(0.81)T(0.194)EK	10	KKKARKYSYENFHENSSTEKIIFVDDTTSDE
PF3D7_0728000	eIF2alpha	eukaryotic translation initiation factor 2 subunit alpha, putative	0.333793	-0.173722	0.16007	-0.240719	-0.106726	0.17717	0.142971	PF3D7_0728000	98	S	___1	RVS(1)PKDIIK	3	VDSQKGYIDLSKRRVSPKDIIKCEEKFSKSK
PF3D7_0619500	ACS12	acyl-CoA synthetase	0.333743	-2.56184	-2.2281	-2.63372	-2.48997	-1.81315	-2.64305	PF3D7_0619500	576	S	___1	ILSSYNDDYNKNNTNNIYINKS(0.5)S(0.5)HEQK	22	DDYNKNNTNNIYINKSSHEQKNMSLSPFDEN
PF3D7_0619500	ACS12	acyl-CoA synthetase	0.333743	-2.56184	-2.2281	-2.63372	-2.48997	-1.81315	-2.64305	PF3D7_0619500	577	S	___1	ILSSYNDDYNKNNTNNIYINKS(0.5)S(0.5)HEQK	23	DYNKNNTNNIYINKSSHEQKNMSLSPFDENL
PF3D7_1321100		conserved Plasmodium protein, unknown function	0.333114	1.63725	1.97036	1.76408	1.51041	1.95877	1.98195	PF3D7_1321100	942	S	___1	EGS(0.862)T(0.069)T(0.069)LK	3	VPSDENTINDKTKEGSTTLKTAMGYITKFKD
PF3D7_0501300	SBP1	skeleton-binding protein 1	0.333112	6.32711	6.66022	6.36708	6.28715	6.58851	6.73194	PF3D7_0501300	324	S	___1	TQQNPQQNAQQNTQQNTQQQS(0.996)T(0.004)TK	21	QQNAQQNTQQNTQQQSTTKSTTKTVARET__
PF3D7_0415300	CRK3	cdc2-related protein kinase 3	0.333043	-0.668053	-0.33501	-0.53603	-0.800076	-0.25939	-0.410629	PF3D7_0415300	1124	S	___1	MKEYNHNRS(1)PSHAK	9	IKYYDHKMKEYNHNRSPSHAKKYNNEKREKE
PF3D7_0707600	MED10	conserved Plasmodium protein, unknown function	0.332852	-0.118917	0.213935	-0.10165	-0.136185	0.16036	0.267509	PF3D7_0707600	57	S	___2	FKDLDNS(0.987)Y(0.026)AS(0.987)DRK	7	DDNDESIEKFKDLDNSYASDRKQKEDNDLEK
PF3D7_0707600	MED10	conserved Plasmodium protein, unknown function	0.332852	-0.118917	0.213935	-0.10165	-0.136185	0.16036	0.267509	PF3D7_0707600	60	S	___2	FKDLDNS(0.001)YAS(0.999)DR	10	DESIEKFKDLDNSYASDRKQKEDNDLEKKII
PF3D7_0606000	KIC1	conserved Plasmodium protein, unknown function	0.332643	2.24539	2.57804	2.45549	2.0353	2.57418	2.58189	PF3D7_0606000	625	S	___1	S(0.5)KIS(0.5)DHGLNNDNVEQNICNLK	1	EDEDDNDNDNCRGQKSKISDHGLNNDNVEQN
PF3D7_0320000	I2	protein phosphatase inhibitor 2	0.332598	-1.56665	-1.23405	-1.55274	-1.58056	-1.36635	-1.10176	PF3D7_0320000	115	S	___1	S(0.5)GT(0.5)LDDIDEEYKPDNK	1	KKHYNEYKMLQKLRKSGTLDDIDEEYKPDNK
PF3D7_0817300		conserved Plasmodium protein, unknown function	0.332136	-0.293696	0.0384398	-0.319859	-0.267534	-0.0571404	0.13402	PF3D7_0817300	166	S	___1	NIIVIDDSLPNNS(0.013)NS(0.879)T(0.108)FDDKEK	15	KNIIVIDDSLPNNSNSTFDDKEKTETNNRIN
PF3D7_0815800	VPS9	vacuolar protein sorting-associated protein 9, putative	0.332128	-0.686712	-0.354585	-0.72426	-0.649164	-0.49362	-0.215549	PF3D7_0815800	775	S	___1	DDDS(0.003)ILS(0.997)NEKLK	7	KKDLLNMSKDDDSILSNEKLKEKKKNLLKQD
PF3D7_1312800		conserved Plasmodium protein, unknown function	0.331862	-2.25352	-1.92165	-2.07091	-2.43612	-1.83114	-2.01217	PF3D7_1312800	91	S	___1	GGS(0.048)IKNS(0.952)FMK	7	NGEKEGEEKGGSIKNSFMKIFQKKKKKKKKK
PF3D7_0112200	MRP1	multidrug resistance-associated protein 1	0.331858	-3.41424	-3.08238	-3.28956	-3.53893	-3.08689	-3.07788	PF3D7_0112200	1531	S	___2	NVS(0.001)LS(0.008)S(0.007)IINS(0.432)S(0.552)QDDES(0.001)KK	11	IVEYKNVSLSSIINSSQDDESKKKYGIKFEN
PF3D7_0602600		conserved Plasmodium protein, unknown function	0.331807	-1.75887	-1.42706	-1.74863	-1.76911	-1.53248	-1.32164	PF3D7_0602600	467	S	___2	SIS(0.001)DAVS(0.999)EVS(1)DLS(1)DDNKNEK	7	RYLNNKNNKSISDAVSEVSDLSDDNKNEKGK
PF3D7_0602600		conserved Plasmodium protein, unknown function	0.331807	-1.75887	-1.42706	-1.74863	-1.76911	-1.53248	-1.32164	PF3D7_0602600	473	S	___2	SIS(0.001)DAVS(0.999)EVS(1)DLS(1)DDNKNEK	13	NNKSISDAVSEVSDLSDDNKNEKGKEKVRNN
PF3D7_0606000	KIC1	conserved Plasmodium protein, unknown function	0.331637	1.37835	1.70999	1.42628	1.33042	1.65834	1.76163	PF3D7_0606000	361	S	___1	NFTLPS(1)EEKITSYNFLK	6	SVIFPMEKYRNFTLPSEEKITSYNFLKKHNS
PF3D7_0904800	RPA1	replication protein A1, small fragment	0.331633	0.0739479	0.405581	-0.368999	0.516895	0.807501	0.0036602	PF3D7_0904800	123	S	___1	KIS(1)LVNLR	3	HEVKDDGEIKIQKKISLVNLRDIKIATKETP
PF3D7_1442400	KIC9	conserved Plasmodium protein, unknown function	0.331622	2.46144	2.79306	2.55654	2.36633	2.71127	2.87485	PF3D7_1442400	456	S	___2	ENNEY(0.001)KS(0.999)MMNS(0.997)FET(0.003)LK	7	GNENVIHLKENNEYKSMMNSFETLKIYEQDE
PF3D7_1442400	KIC9	conserved Plasmodium protein, unknown function	0.331622	2.46144	2.79306	2.55654	2.36633	2.71127	2.87485	PF3D7_1442400	460	S	___2	SMMNS(1)FETLK	5	VIHLKENNEYKSMMNSFETLKIYEQDENNKQ
PF3D7_0309600	PfP2	60S acidic ribosomal protein P2	0.331522	-4.84241	-4.51089	-4.83415	-4.85067	-4.80824	-4.21354	PF3D7_0309600	109	S	___1	KEEEEEEEDDLGFS(1)LFG	14	EKKEEEEEEEDDLGFSLFG____________
PF3D7_1342600	MyoA	myosin A	0.331283	2.77073	3.10201	2.4857	3.05576	3.58843	2.61559	PF3D7_1342600	19	S	___1	RVS(1)NVEAFDK	3	TNEEIKTASKIVRRVSNVEAFDKSGSVFKGY
PF3D7_1110900		ES2 protein, putative	0.331217	-2.3042	-1.97298	-2.21604	-2.39235	-2.07814	-1.86782	PF3D7_1110900	4	T	___2	S(0.401)DT(0.585)S(0.065)S(0.943)IKIT(0.006)R	3	____________MSDTSSIKITRDEDIGYAE
PF3D7_1423700		conserved Plasmodium protein, unknown function	0.331003	-0.176377	0.154626	-0.170069	-0.182686	0.196241	0.11301	PF3D7_1423700	284	T	___1	NVVVPYNDIGNKNEEKHNT(1)NEDYFNFGK	19	VPYNDIGNKNEEKHNTNEDYFNFGKDMGNPS
PF3D7_1302000	PTP6	EMP1-trafficking protein	0.330453	3.05649	3.38694	3.04085	3.07212	3.47345	3.30043	PF3D7_1302000	302	S	___1	KDTNDNTTNNKS(1)ATK	12	KNIKKDTNDNTTNNKSATKTNVTKTS_____
PF3D7_0104800	NPT1	novel putative transporter 1, putative	0.330377	-3.47365	-3.14327	-3.65577	-3.29152	-3.05357	-3.23297	PF3D7_0104800	253	T	___1	NNET(0.002)T(0.002)KHT(0.996)NAEGR	8	ALDYYLEKNNETTKHTNAEGRSRSSNNIYTN
PF3D7_1121000	DHHC3	palmitoyltransferase DHHC3	0.330303	-3.21139	-2.88109	-3.23375	-3.18904	-2.96498	-2.7972	PF3D7_1121000	12	T	___1	DDT(0.5)RS(0.5)KEADEFVR	3	____MNNHICAFRDDTRSKEADEFVRKNGFT
PF3D7_0409600	RPA1	replication protein A1, large subunit	0.329453	1.78908	2.11854	1.76987	1.80829	2.16632	2.07075	PF3D7_0409600	290	S	___1	QNS(1)EHIMKENNNK	3	NNGKAYNHNVHNRQNSEHIMKENNNKNFTTP
PF3D7_1006100	NOT5	CCR4-NOT transcription complex subunit 5, putative	0.329412	-2.32468	-1.99527	-2.26083	-2.38853	-1.96398	-2.02656	PF3D7_1006100	20	T	___1	KDNET(0.829)MS(0.171)LAAENMLENNFFK	5	NNNSYKKDKKKKDNETMSLAAENMLENNFFK
PF3D7_1451200		conserved Plasmodium protein, unknown function	0.329368	-2.78209	-2.45272	-2.8219	-2.74228	-2.52582	-2.37962	PF3D7_1451200	1002	S	___1	RYENIS(1)ER	6	ETDGSNAFGRRYENISERTLYKDYVSTNLYR
PF3D7_0606700		coatomer alpha subunit, putative	0.329308	0.159853	0.489161	0.122931	0.196775	0.47809	0.500231	PF3D7_0606700	1167	S	___1	SDFS(1)DENDIWK	4	SYNSEVNKFEGKSDFSDENDIWKNDVNDEDI
PF3D7_0904600		ubiquitin specific protease, putative	0.329277	0.365948	0.695225	0.43672	0.295176	0.64563	0.74482	PF3D7_0904600	278	S	___1	NNNINSTVNYDNTNTEENIT(0.131)S(0.869)DHCNIKDDTR	21	STVNYDNTNTEENITSDHCNIKDDTRLEKDM
PF3D7_1462400		conserved Plasmodium protein, unknown function	0.329177	-2.66352	-2.33434	-2.71799	-2.60905	-2.36484	-2.30384	PF3D7_1462400	575	S	___1	S(0.015)DYS(0.985)EDNNLLNNPYDNK	4	LKENRNKVKSSRSDYSEDNNLLNNPYDNKTR
PF3D7_0202000	KAHRP	erythrocyte membrane protein 1, PfEMP1;knob-associated histidine-rich protein	0.328878	-1.10516	-0.776279	-1.07255	-1.13777	-0.751249	-0.80131	PF3D7_0202000;PF3D7_1255200	550;1774	S	___2	EAS(0.262)T(0.88)S(0.85)KEAT(0.008)K	5	AAEGATKGATKEASTSKEATKEASTSKEATK
PF3D7_0401800	PfD80	Plasmodium exported protein (PHISTb), unknown function	0.328798	3.04921	3.37801	3.09541	3.003	3.32569	3.43032	PF3D7_0401800	75	S	___2	RS(0.009)PS(0.987)T(0.004)ASTSTSLR	4	SSSCSSLASTTKRSPSTASTSTSLRSASTAS
PF3D7_1423200	CYP52	peptidyl-prolyl cis-trans isomerase	0.328777	-0.315618	0.0131598	-0.28771	-0.343525	-0.06106	0.0873795	PF3D7_1423200	220	S	___2	KEQNLLSFDYDQEIS(1)DDS(0.856)ET(0.145)FFR	15	KKEQNLLSFDYDQEISDDSETFFRGDKDQTV
PF3D7_1423200	CYP52	peptidyl-prolyl cis-trans isomerase	0.328777	-0.315618	0.0131598	-0.28771	-0.343525	-0.06106	0.0873795	PF3D7_1423200	223	S	___2	EQNLLS(0.001)FDY(0.146)DQEIS(0.869)DDS(0.869)ET(0.114)FFRGDKDQTVK	17	QNLLSFDYDQEISDDSETFFRGDKDQTVKQK
PF3D7_0405400	PRPF8	pre-mRNA-processing-splicing factor 8, putative	0.328298	-1.00938	-0.681085	-1.04068	-0.978085	-0.426109	-0.93606	PF3D7_0405400	760	S	___1	HS(0.5)KHS(0.5)DADDNRYDK	2	DDDKKKKSTSKSRKHSKHSDADDNRYDKGYR
PF3D7_1249300	PPM4	protein phosphatase PPM4, putative	0.328197	2.45299	2.78119	2.59352	2.31245	2.76351	2.79886	PF3D7_1249300	62	S	___1	DIDDKIS(0.983)S(0.017)GDADKYSK	7	NEKKNLFNKDIDDKISSGDADKYSKMDDDKD
PF3D7_1359900		conserved Plasmodium membrane protein, unknown function	0.327958	-0.520042	-0.192084	-0.4447	-0.595385	-0.263079	-0.12109	PF3D7_1359900	1478	T	___1	NLNESYGNFNT(0.996)PT(0.004)ISPTNIK	11	GNKMRNLNESYGNFNTPTISPTNIKRNKTIA
PF3D7_0913200	EF-1beta	elongation factor 1-beta	0.327958	-0.880372	-0.552414	-0.917789	-0.842955	-0.585499	-0.519329	PF3D7_0913200	164	S	___1	S(0.999)IDT(0.001)DIAK	1	KEKNRSILIIEIKPKSIDTDIAKIPKLVKQK
PF3D7_0317200	CRK4	cdc2-related protein kinase 4	0.327878	1.52977	1.85765	1.5352	1.52433	1.90473	1.81056	PF3D7_0317200	997	S	___1	NQYS(0.998)PS(0.002)LETVQR	4	DFSFQRHRKPERNQYSPSLETVQRNNRYSNF
PF3D7_0606100		RNA-binding protein, putative	0.327742	0.838304	1.16605	0.891811	0.784796	1.15907	1.17302	PF3D7_0606100	461	S	___1	NTIS(1)YVRR	4	SRSSTSSNKHKRNTISYVRREKKYIYDKNKK
PF3D7_0303200		HAD superfamily protein, putative	0.327567	2.17459	2.50216	2.28671	2.06248	2.65179	2.35253	PF3D7_0303200	314	S	___1	NLS(1)ESHVRK	3	ATSKDDPVYIPKRNLSESHVRKTGKKKKLIK
PF3D7_0323800		conserved Plasmodium protein, unknown function	0.327553	-3.8054	-3.47784	-3.98827	-3.62253	-3.31769	-3.638	PF3D7_0323800	314	S	___1	EHYNAAS(0.026)S(0.974)NEYNHNNK	8	GKMHLTGKEHYNAASSNEYNHNNKNTNNYNN
PF3D7_0401800	PfD80	Plasmodium exported protein (PHISTb), unknown function	0.327313	1.13156	1.45888	1.13438	1.12874	1.43033	1.48742	PF3D7_0401800	79	T	___1	RS(0.007)PS(0.979)T(0.047)AS(0.14)T(0.801)S(0.02)T(0.006)S(0.001)LR	8	SSLASTTKRSPSTASTSTSLRSASTASTAST
PF3D7_0519600		zinc finger protein, putative	0.327262	-3.12971	-2.80245	-2.83352	-3.42591	-2.7293	-2.8756	PF3D7_0519600	527	Y	___1	AS(0.126)QS(0.126)DS(0.126)Y(0.623)EENAEYSQSDGITNTESNFENSQK	7	NEKFNRSNKASQSDSYEENAEYSQSDGITNT
PF3D7_1416100	SEY1	protein SEY1, putative	0.326988	-4.34165	-4.01466	-4.19232	-4.49098	-3.92703	-4.10229	PF3D7_1416100	679	S	___1	GIFQNINNNNEGS(0.869)DEICY(0.112)T(0.018)NALKK	13	NEKGIFQNINNNNEGSDEICYTNALKKIDLI
PF3D7_1022400	SRSF4	serine/arginine-rich splicing factor 4	0.326878	-2.3885	-2.06162	-2.43236	-2.34464	-2.19827	-1.92497	PF3D7_1022400	356	S	___2	SLS(1)EDRSNSR	3	RRTVSEDRSERRRSLSEDRSNSRKRNASSDF
PF3D7_1022400	SRSF4	serine/arginine-rich splicing factor 4	0.326878	-2.3885	-2.06162	-2.43236	-2.34464	-2.19827	-1.92497	PF3D7_1022400	362	S	___2	S(0.132)LS(0.867)EDRS(0.04)NS(0.96)R	9	DRSERRRSLSEDRSNSRKRNASSDFKRELNS
PF3D7_0516900	RPL2	60S ribosomal protein L2	0.326758	0.995012	1.32177	0.99016	0.999865	1.26562	1.37792	PF3D7_0516900	140	S	___1	ASGCYATVVGQS(1)EDGK	12	TLVKASGCYATVVGQSEDGKKTKVRLPSGAK
PF3D7_1136400	SRP72	signal recognition particle subunit SRP72, putative	0.326728	-3.35319	-3.02646	-3.55433	-3.15205	-2.74943	-3.30349	PF3D7_1136400	8	T	___1	MEEERADT(0.897)FNDLT(0.103)EDDIK	8	________MEEERADTFNDLTEDDIKSYMEN
PF3D7_1222400	ApiAP2	AP2 domain transcription factor	0.326603	-0.336432	-0.00982952	-0.226019	-0.446846	-0.0619297	0.0422707	PF3D7_1222400	1413	T	___1	NKT(1)YPFNYNEPFYFIYKPNK	3	SGDKRYIRKRNNKNKTYPFNYNEPFYFIYKP
PF3D7_1468100		conserved Plasmodium protein, unknown function	0.326452	-1.614	-1.28755	-1.45863	-1.76937	-1.32423	-1.25086	PF3D7_1468100	2453	T	___1	NAQSPNNDNDQNEVVGANEREDDS(0.399)T(0.601)NR	25	DQNEVVGANEREDDSTNRNYNNGKSSNEEEN
PF3D7_0306900		40S ribosomal protein S23, putative	0.326372	-1.89953	-1.57316	-1.88878	-1.91029	-1.52589	-1.62043	PF3D7_0306900	113	S	___1	S(0.037)GHS(0.963)VGDLPGVK	4	ENDEVLVSGFGRSGHSVGDLPGVKFKVVKVA
PF3D7_0614300	MFR1	major facilitator superfamily-related transporter, putative	0.326183	3.06171	3.38789	3.07829	3.04512	3.37946	3.39632	PF3D7_0614300	32	S	___1	KYEGEFLKS(1)NTTEMK	9	LRKNESKKYEGEFLKSNTTEMKGRKVVSKID
PF3D7_1433500	TOP2	DNA topoisomerase 2	0.326082	0.593998	0.92008	0.50868	0.679316	0.87425	0.96591	PF3D7_1433500	1211	S	___1	NVELS(0.002)NREES(0.998)NKFK	10	AIEFQRNVELSNREESNKFKVARKQGPSSMK
PF3D7_0930500	DGK1	diacylglycerol kinase, putative	0.325828	3.33867	3.6645	3.3625	3.31483	3.65641	3.67258	PF3D7_0930500	1248	S	___1	NENAS(1)DYANNIYK	5	EIKNIEKFINRNENASDYANNIYKSYRLDSY
PF3D7_0903500	NUP138	conserved Plasmodium protein, unknown function	0.325637	1.80435	2.12998	1.80794	1.80075	2.14357	2.1164	PF3D7_0903500	609	S	___1	GATTNES(0.005)VS(0.993)PS(0.002)KLEQTVNVVQNQK	9	TLNVLDKGATTNESVSPSKLEQTVNVVQNQK
PF3D7_1017600		conserved Plasmodium protein, unknown function	0.325367	-1.40326	-1.0779	-1.38917	-1.41735	-1.27602	-0.87977	PF3D7_1017600	611	S	___2	EGQNDIHEY(0.14)ES(0.852)ES(0.52)S(0.488)KHNIPR	11	IKEEKEGQNDIHEYESESSKHNIPRKSLSKK
PF3D7_0917900	BIP	heat shock protein 70	0.325182	5.21642	5.5416	5.20513	5.22771	5.58451	5.49869	PF3D7_0917900	514	T	___1	NGILHVEAEDKGT(1)GK	13	VDKNGILHVEAEDKGTGKSRGITITNDKGRL
PF3D7_0824900		conserved Plasmodium protein, unknown function	0.325059	0.282897	0.607956	0.36273	0.203064	0.614401	0.601511	PF3D7_0824900	820	S	___1	QEINES(1)NES(1)LDERIDEEIER	9	NDVKRSKQEINESNESLDERIDEEIERNSQN
PF3D7_1015900	ENO	enolase	0.325012	1.5051	1.83012	1.58673	1.42348	1.75641	1.90382	PF3D7_1015900	101	S	___1	IDNLMVEELDGS(1)KNEWGWSK	12	EQKKIDNLMVEELDGSKNEWGWSKSKLGANA
PF3D7_0817300		conserved Plasmodium protein, unknown function	0.325008	-2.07705	-1.75204	-2.02264	-2.13147	-1.79123	-1.71286	PF3D7_0817300	2220	S	___1	S(1)MDASNNQNDYYNQNY	1	YNLANGNMMYDMNNRSMDASNNQNDYYNQNY
PF3D7_0424500	FIKK4.1	serine/threonine protein kinase, FIKK family	0.324973	1.71316	2.03814	1.72142	1.7049	2.02638	2.04989	PF3D7_0424500	493	S	___1	YYESYQPCIS(1)K	10	GNKRLRYYESYQPCISKVPLLPPECWNIVRI
PF3D7_1013600		conserved Plasmodium protein, unknown function	0.324727	-0.0863819	0.238345	-0.124729	-0.0480347	0.275261	0.201429	PF3D7_1013600	2069	S	___1	T(0.003)NS(0.977)S(0.02)NEMK	3	DNLITYAEQKSQRTNSSNEMKCTHLKKSAKK
PF3D7_0416000		RNA-binding protein, putative	0.324603	-2.78582	-2.46121	-2.66421	-2.90742	-2.61433	-2.3081	PF3D7_0416000	16	S	___1	EDT(0.482)S(0.519)DRADEVS(1)LENLSFEK	11	MNETKEDTSDRADEVSLENLSFEKRSFEKLS
PF3D7_0504700	CEP120	centrosomal protein CEP120, putative	0.324477	0.371008	0.695485	0.27182	0.470196	0.662291	0.72868	PF3D7_0504700	734	S	___1	IDS(1)DNESLILIK	3	NDTPIIEKNKNKKIDSDNESLILIKHNKGSC
PF3D7_1417600		conserved Plasmodium protein, unknown function	0.324153	1.23705	1.56121	1.26493	1.20918	1.53789	1.58452	PF3D7_1417600	3747	S	___1	KNVS(0.29)S(0.71)NIR	5	GNIKNDNIEEKKNVSSNIRSIADNSQRLQNI
PF3D7_0517700	EIF3B	eukaryotic translation initiation factor 3 subunit B, putative	0.323553	-2.31704	-1.99348	-2.2482	-2.38588	-2.10628	-1.88069	PF3D7_0517700	10	S	___1	VRVS(1)DNELS(1)DKELVDFLS(1)EDS(1)DNGDENLLNK	9	______MVRVSDNELSDKELVDFLSEDSDNG
PF3D7_1222700	GAP45	glideosome-associated protein 45	0.323513	-1.76833	-1.44481	-1.98405	-1.5526	-1.57789	-1.31174	PF3D7_1222700	101	S	___2	HLEDLERS(0.978)NS(0.588)DIY(0.225)S(0.173)ES(0.036)QK	8	ENKSFEEKHLEDLERSNSDIYSESQKFDNAS
PF3D7_1222700	GAP45	glideosome-associated protein 45	0.323513	-1.76833	-1.44481	-1.98405	-1.5526	-1.57789	-1.31174	PF3D7_1222700	103	S	___2	S(0.001)NS(0.999)DIYSESQK	3	KSFEEKHLEDLERSNSDIYSESQKFDNASDK
PF3D7_1417200		NOT family protein, putative	0.323442	-2.92742	-2.60397	-2.95498	-2.89985	-2.3977	-2.81025	PF3D7_1417200	3488	S	___1	IVDS(1)EEIIEK	4	MFLLEKLSYENKIVDSEEIIEKEVVKNINHT
PF3D7_1410200	CTPS	cytidine triphosphate synthetase	0.323438	2.05362	2.37706	2.1364	1.97083	2.34252	2.41159	PF3D7_1410200	397	S	___2	YSYENFHENS(0.001)S(0.998)T(0.001)EK	11	KKARKYSYENFHENSSTEKIIFVDDTTSDED
PF3D7_1328300		conserved Plasmodium protein, unknown function	0.323253	-2.89149	-2.56824	-2.86536	-2.91763	-2.61073	-2.52575	PF3D7_1328300	40	S	___1	EVELMETIENLS(0.857)DDIGS(0.108)NNFS(0.017)Y(0.018)DSNDSSK	12	RSTKEVELMETIENLSDDIGSNNFSYDSNDS
PF3D7_1123100	CDPK7	calcium-dependent protein kinase 7	0.323137	3.08263	3.40577	3.12141	3.04386	3.35334	3.4582	PF3D7_1123100	1447	S	___2	S(1)QDGIEADVIKQGELNNEK	1	IFHNKVDEKRGSFSKSQDGIEADVIKQGELN
PF3D7_1139300	ApiAP2	AP2 domain transcription factor, putative	0.323117	-0.861222	-0.538105	-0.847639	-0.874805	-0.63987	-0.43634	PF3D7_1139300	25	S	___2	TMNSLY(0.001)Y(0.007)NS(0.96)DY(0.081)S(0.951)NDINIEDSK	9	LRTRRKKTMNSLYYNSDYSNDINIEDSKSRL
PF3D7_0414900	ARO	armadillo-domain containing rhoptry protein	0.322878	-2.41665	-2.09377	-2.65106	-2.18224	-2.02563	-2.16191	PF3D7_0414900	25	S	___1	LQEFGIEGS(0.5)KT(0.5)IR	9	DLLYKNKLQEFGIEGSKTIRKLLSFTSNDIL
PF3D7_0414900	ARO	armadillo-domain containing rhoptry protein	0.322878	-2.41665	-2.09377	-2.65106	-2.18224	-2.02563	-2.16191	PF3D7_0414900	27	T	___1	LQEFGIEGS(0.5)KT(0.5)IR	11	LYKNKLQEFGIEGSKTIRKLLSFTSNDILRF
PF3D7_1410400	RAP1	rhoptry-associated protein 1	0.322707	1.14935	1.47206	1.0703	1.2284	1.48994	1.45418	PF3D7_1410400	183	S	___1	S(0.013)AS(0.987)VAGIVGADEEAPPAPK	3	NSSEESTTKSSKRSASVAGIVGADEEAPPAP
PF3D7_1110900		ES2 protein, putative	0.322547	-0.855132	-0.532585	-0.79822	-0.912045	-0.61507	-0.4501	PF3D7_1110900	6	S	___2	S(0.401)DT(0.585)S(0.065)S(0.943)IKIT(0.006)R	5	__________MSDTSSIKITRDEDIGYAEKK
PF3D7_1128500		conserved protein, unknown function	0.322343	1.29452	1.61686	1.3214	1.26764	1.54559	1.68813	PF3D7_1128500	3	S	___1	MDS(1)DLIDEEFVYGQK	3	_____________MDSDLIDEEFVYGQKIGK
PF3D7_1015400		conserved Plasmodium protein, unknown function	0.322244	-1.26485	-0.942604	-1.32502	-1.20468	-0.894629	-0.99058	PF3D7_1015400	478	S	___2	NYS(1)NDHPR	3	EYKNHNSYKEPLRNYSNDHPRNSYNKNKYNI
PF3D7_1015400		conserved Plasmodium protein, unknown function	0.322244	-1.26485	-0.942604	-1.32502	-1.20468	-0.894629	-0.99058	PF3D7_1015400	485	S	___2	NYSNDHPRNS(1)YNK	10	YKEPLRNYSNDHPRNSYNKNKYNIFNENKRN
PF3D7_0202000	KAHRP	knob-associated histidine-rich protein	0.322227	3.39376	3.71599	3.39874	3.38877	3.67759	3.75438	PF3D7_0202000	584	T	___3	GAT(1)KEAS(0.957)T(0.037)T(0.006)EGATK	3	TSKEATKEASTSKGATKEASTTEGATKGAST
PF3D7_0202600.2-p1		conserved Plasmodium protein, unknown function	0.321921	-0.282202	0.0397196	-0.185169	-0.379234	-0.10194	0.181379	PF3D7_0202600.2-p1;PF3D7_0202600	704;704	S	___1	MGENIFEEIPKKDDVEIEET(0.095)YS(0.905)EK	22	EEIPKKDDVEIEETYSEKMWEIHDEKIKDKY
PF3D7_0601900		conserved Plasmodium protein, unknown function	0.321823	-4.35256	-4.03074	-4.20464	-4.50049	-4.21686	-3.84462	PF3D7_0601900	123	S	___1	SHSSSSSVY(0.014)AS(0.986)ANAEN	11	RQAARSHSSSSSVYASANAEN__________
PF3D7_1411200	ROM8	rhomboid protease ROM8	0.321638	0.000907898	0.322546	0.0834904	-0.0816746	0.396051	0.249041	PF3D7_1411200	243	S	___2	LTNTHENLLS(1)DHHDYTSLK	10	KSNKLKLTNTHENLLSDHHDYTSLKVNYKIN
PF3D7_1411200	ROM8	rhomboid protease ROM8	0.321638	0.000907898	0.322546	0.0834904	-0.0816746	0.396051	0.249041	PF3D7_1411200	237	T	___2	LT(0.022)NT(0.978)HENLLS(0.999)DHHDYT(0.001)SLK	4	KTKTIKKSNKLKLTNTHENLLSDHHDYTSLK
PF3D7_1473200		DnaJ protein, putative	0.321498	0.858628	1.18013	0.811161	0.906096	1.2195	1.14075	PF3D7_1473200	133	S	___1	SEIS(0.046)GKS(0.954)EISGNSENAR	7	SGKSENSGKSEISGKSEISGNSENARNSENF
PF3D7_0627100		ankyrin-repeat protein, putative	0.321133	2.83173	3.15287	2.88951	2.77395	3.12395	3.18178	PF3D7_0627100	1284	S	___1	NNNDEDVES(1)NNADALKK	9	NNNTCNKNNNDEDVESNNADALKKVDNSNTI
PF3D7_1142100		conserved Plasmodium protein, unknown function	0.321132	0.0727577	0.393889	0.104101	0.0414143	0.45554	0.332239	PF3D7_1142100	1917	S	___1	EYEEESSGFNNIQHDNT(0.07)MKS(0.93)PVDK	20	ESSGFNNIQHDNTMKSPVDKHMDHNNVPINE
PF3D7_1110200	PRPF6	pre-mRNA-processing factor 6, putative	0.321113	-0.793733	-0.47262	-0.66861	-0.918856	-0.46797	-0.47727	PF3D7_1110200	1266	S	___1	DQGNES(1)VDDEKDYEK	6	TNQENDKEKKDQGNESVDDEKDYEKETNNNV
PF3D7_1123100	CDPK7	calcium-dependent protein kinase 7	0.320989	3.11641	3.4374	3.15485	3.07797	3.38507	3.48973	PF3D7_1123100	1443	S	___2	RGS(1)FSK	3	LGCSIFHNKVDEKRGSFSKSQDGIEADVIKQ
PF3D7_1237200		conserved Plasmodium protein, unknown function	0.320977	0.168103	0.48908	0.185041	0.151165	0.533161	0.445	PF3D7_1237200	1396	S	___1	IHNHS(1)NS(1)LDDDER	7	RNSLDDDERIHNHSNSLDDDERIHNHRNSLD
PF3D7_0422500	BRR2	pre-mRNA-splicing helicase BRR2, putative	0.320882	1.77188	2.09276	1.8878	1.65597	2.1089	2.07663	PF3D7_0422500	556	S	___1	YYDEENVS(1)DDDNYYESTK	8	EEKEEGPKYYDEENVSDDDNYYESTKLYNSD
PF3D7_0619000		conserved protein, unknown function	0.320772	1.98995	2.31073	2.07966	1.90025	2.31695	2.3045	PF3D7_0619000;PF3D7_0619000.2-p1	671;672	S	___1	NNNMIDQYNS(1)DSNFIKENDLK	10	ETNTVKNNNMIDQYNSDSNFIKENDLKDYYF
PF3D7_0401800	PfD80	Plasmodium exported protein (PHISTb), unknown function	0.320297	0.629178	0.949475	0.724741	0.533615	0.90637	0.99258	PF3D7_0401800	282	S	___1	LPSTGS(0.979)T(0.021)IR	6	TGSTSGSTTRLPSTGSTIRFPSTGSSRLEDY
PF3D7_0402100		Plasmodium exported protein (PHISTb), unknown function	0.320223	-1.80178	-1.48156	-1.79126	-1.81231	-1.54855	-1.41457	PF3D7_0402100	386	T	___1	MNT(0.663)IY(0.333)HKS(0.004)GLEK	3	YEKEEYNDKYEKKMNTIYHKSGLEKAENYLN
PF3D7_0418600		regulator of chromosome condensation, putative	0.319838	-1.20567	-0.885835	-1.2612	-1.15014	-0.94293	-0.828739	PF3D7_0418600	1159	S	___1	QLYEINNY(0.042)IDDEENS(0.958)DDRNNK	15	KQLYEINNYIDDEENSDDRNNKNHTYDCNDK
PF3D7_1346300	ALBA2	DNA/RNA-binding protein Alba 2	0.319432	-0.916807	-0.597375	-0.832449	-1.00117	-0.55201	-0.64274	PF3D7_1346300	124	T	___1	EANNRT(1)VEFITTVPCMK	6	EEDEENNKNKEANNRTVEFITTVPCMKIILS
PF3D7_0202000	KAHRP	knob-associated histidine-rich protein	0.319313	3.32987	3.64918	3.33604	3.32369	3.60948	3.68888	PF3D7_0202000	578	S	___3	EAS(0.997)T(0.003)SKGATKEAS(0.804)T(0.163)T(0.033)EGATK	3	ATKEASTSKEATKEASTSKGATKEASTTEGA
PF3D7_0404600		conserved Plasmodium membrane protein, unknown function	0.319303	-0.451727	-0.132424	-0.27607	-0.627384	-0.24124	-0.0236092	PF3D7_0404600	1375	S	___1	NIAFLYEENKYS(0.426)DS(0.574)HNIGNIK	14	DKNIAFLYEENKYSDSHNIGNIKYINNNIYE
PF3D7_0915400	PFK9	ATP-dependent 6-phosphofructokinase	0.319263	0.375162	0.694426	0.25659	0.493734	0.798481	0.59037	PF3D7_0915400	1283	S	___1	S(0.5)AS(0.5)KGDLPVIPSAPVDLNGK	1	LMKILPKGQGSKYLKSASKGDLPVIPSAPVD
PF3D7_0915400	PFK9	ATP-dependent 6-phosphofructokinase	0.319263	0.375162	0.694426	0.25659	0.493734	0.798481	0.59037	PF3D7_0915400	1285	S	___1	S(0.5)AS(0.5)KGDLPVIPSAPVDLNGK	3	KILPKGQGSKYLKSASKGDLPVIPSAPVDLN
PF3D7_0831400		Plasmodium exported protein, unknown function	0.319138	-1.22031	-0.90117	-1.12797	-1.31264	-0.937929	-0.86441	PF3D7_0831400	148	S	___1	NEIMDDNYY(0.001)S(0.999)R	10	QIPYLRNEIMDDNYYSRYFDSNIMRTDEVTT
PF3D7_0622200		radical SAM protein, putative	0.319077	0.127628	0.446706	0.211071	0.0441856	0.444141	0.44927	PF3D7_0622200	113	S	___1	LHESSISY(0.003)LS(0.999)S(0.999)DNDVNSNTEYEK	10	LDEIMKLHESSISYLSSDNDVNSNTEYEKIK
PF3D7_1441300		serine/threonine protein kinase, putative	0.318413	1.1334	1.45182	1.23066	1.03614	1.37456	1.52907	PF3D7_1441300	1539	Y	___3	KY(0.535)S(0.535)S(0.942)LY(0.988)GKNEK	2	KIETSNYFNKEHIKKYSSLYGKNEKKNDIIN
PF3D7_1033200	ETRAMP10.2	early transcribed membrane protein 10.2	0.318402	2.74866	3.06707	2.75771	2.73961	3.01087	3.12326	PF3D7_1033200	329	S	___1	S(1)KGPSSPLR	1	SSGSSNRSSSGTSTRSKGPSSPLRDSSGRSS
PF3D7_1140700		conserved Plasmodium protein, unknown function	0.318298	-0.724128	-0.405829	-0.70677	-0.741486	-0.449589	-0.36207	PF3D7_1140700	1170	S	___1	YYINDNNNNSTSNSRPSLIHDNLS(1)ENDFNK	24	NSTSNSRPSLIHDNLSENDFNKIGDELKRKQ
PF3D7_1004400		RNA-binding protein, putative	0.318268	-0.543423	-0.225155	-0.43956	-0.647285	-0.24641	-0.203899	PF3D7_1004400	843	S	___3	IT(0.12)RVS(0.88)EES(0.703)T(0.236)T(0.062)K	8	KKTTTKKRITRVSEESTTKVDTRESDEDDLM
PF3D7_1004400		RNA-binding protein, putative	0.318268	-0.543423	-0.225155	-0.43956	-0.647285	-0.24641	-0.203899	PF3D7_1004400	844	T	___3	VS(0.433)EES(0.506)T(0.531)T(0.531)KVDT(0.555)RES(0.445)DEDDLMENEQWTDSK	6	KTTTKKRITRVSEESTTKVDTRESDEDDLME
PF3D7_1004400		RNA-binding protein, putative	0.318268	-0.543423	-0.225155	-0.43956	-0.647285	-0.24641	-0.203899	PF3D7_1004400	845	T	___3	VS(0.433)EES(0.506)T(0.531)T(0.531)KVDT(0.555)RES(0.445)DEDDLMENEQWTDSK	7	TTTKKRITRVSEESTTKVDTRESDEDDLMEN
PF3D7_1004400		RNA-binding protein, putative	0.318268	-0.543423	-0.225155	-0.43956	-0.647285	-0.24641	-0.203899	PF3D7_1004400	849	T	___3	VDT(1)RES(1)DEDDLMENEQWTDSK	3	KRITRVSEESTTKVDTRESDEDDLMENEQWT
PF3D7_1445700		conserved Plasmodium protein, unknown function	0.318258	5.1718	5.49006	5.10699	5.2366	5.41684	5.56327	PF3D7_1445700	68	S	___1	IIEVHDNIPS(1)PIIKDYYNK	10	SNEVNKIIEVHDNIPSPIIKDYYNKRVNVHY
PF3D7_1238700		conserved Plasmodium protein, unknown function	0.318257	-0.691387	-0.37313	-0.52183	-0.860945	-0.369299	-0.376961	PF3D7_1238700	145	S	___1	KLS(0.448)ES(0.552)ICEFNELK	5	KGYMEEACKLRKLSESICEFNELKCFNVKRR
PF3D7_1313800		conserved Plasmodium membrane protein, unknown function	0.317674	1.30443	1.6221	1.33436	1.27449	1.50582	1.73838	PF3D7_1313800	2926	S	___1	NNNDVNDEKDENS(0.955)T(0.045)NEK	13	DIKNNNDVNDEKDENSTNEKKDLNICPKSTI
PF3D7_1110900		ES2 protein, putative	0.317637	-1.51345	-1.19581	-1.47463	-1.55227	-1.2651	-1.12653	PF3D7_1110900	2	S	___2	S(0.678)DT(0.312)S(0.08)S(0.929)IKIT(0.001)R	1	______________MSDTSSIKITRDEDIGY
PF3D7_1233600	AARP1	asparagine and aspartate rich protein 1	0.317483	0.533942	0.851425	0.56274	0.505144	0.873701	0.829149	PF3D7_1233600	1557	S	___1	ADVT(1)GEDDS(1)LLNQK	9	EMKKHMKADVTGEDDSLLNQKGGTTNNNTCD
PF3D7_0823000	VPS15	serine/threonine protein kinase VPS15, putative	0.317478	-2.01042	-1.69294	-2.03973	-1.98112	-1.80446	-1.58143	PF3D7_0823000	417	S	___2	QPIKY(0.998)S(0.998)NT(0.004)HNIK	6	YENDSNFFKRQPIKYSNTHNIKEQLNDDFQE
PF3D7_0823000	VPS15	serine/threonine protein kinase VPS15, putative	0.317478	-2.01042	-1.69294	-2.03973	-1.98112	-1.80446	-1.58143	PF3D7_0823000	416	Y	___2	QPIKY(0.998)S(0.998)NT(0.004)HNIK	5	FYENDSNFFKRQPIKYSNTHNIKEQLNDDFQ
PF3D7_0621800		nascent polypeptide-associated complex subunit alpha, putative	0.317468	1.39683	1.7143	1.42412	1.36954	1.72805	1.70055	PF3D7_0621800	146	S	___1	VKDLDDENVGDVS(1)MDDVELIMSQTK	13	EQKVKDLDDENVGDVSMDDVELIMSQTKCSR
PF3D7_0815800	VPS9	vacuolar protein sorting-associated protein 9, putative	0.317418	2.98845	3.30587	3.02178	2.95511	3.24038	3.37135	PF3D7_0815800	910	S	___1	RS(1)LENIIK	2	LDDGSYEEQSCARKRSLENIIKQLPTDNNNN
PF3D7_1343700	Kelch13	kelch protein K13	0.317403	2.85809	3.17549	2.94994	2.76624	3.11751	3.23347	PF3D7_1343700	191	S	___1	FS(1)TVNNVNDTYEK	2	NLINDDSGLNNLKKFSTVNNVNDTYEKKIIE
PF3D7_0824900		conserved Plasmodium protein, unknown function	0.317398	1.98364	2.30104	2	1.96729	2.28822	2.31386	PF3D7_0824900	817	S	___2	QEINES(1)NES(1)LDERIDEEIER	6	NPINDVKRSKQEINESNESLDERIDEEIERN
PF3D7_0824900		conserved Plasmodium protein, unknown function	0.317398	1.98364	2.30104	2	1.96729	2.28822	2.31386	PF3D7_0824900	820	S	___2	QEINES(1)NES(1)LDERIDEEIER	9	NDVKRSKQEINESNESLDERIDEEIERNSQN
PF3D7_0904100		AP-4 complex subunit epsilon, putative	0.317268	-2.90789	-2.59062	-2.98143	-2.83436	-2.47799	-2.70326	PF3D7_0904100	460	S	___1	LLKDS(0.528)S(0.472)ICAES(0.998)DS(0.998)GDDEINT(0.003)S(0.001)K	11	YSLIKLLKDSSICAESDSGDDEINTSKYKSA
PF3D7_0904100		AP-4 complex subunit epsilon, putative	0.317268	-2.90789	-2.59062	-2.98143	-2.83436	-2.47799	-2.70326	PF3D7_0904100	462	S	___1	LLKDS(0.528)S(0.472)ICAES(0.998)DS(0.998)GDDEINT(0.003)S(0.001)K	13	LIKLLKDSSICAESDSGDDEINTSKYKSASN
PF3D7_0628200	PK4	eukaryotic translation initiation factor 2-alpha kinase	0.316823	3.15456	3.47138	3.12884	3.18027	3.60323	3.33953	PF3D7_0628200	2104	S	___1	NIS(1)HEKLGNNK	3	NNNQTKNKIDTIRNISHEKLGNNKSSSARNL
PF3D7_1144800		conserved Plasmodium protein, unknown function	0.316818	-1.63908	-1.32226	-1.77084	-1.50731	-1.43777	-1.20675	PF3D7_1144800	332	S	___1	NQNIDDIEIY(0.475)NNS(0.525)DKCDNEK	13	NEKNQNIDDIEIYNNSDKCDNEKITKNKNNI
PF3D7_0817300		conserved Plasmodium protein, unknown function	0.316508	-0.955993	-0.639484	-0.78108	-1.13091	-0.691769	-0.5872	PF3D7_0817300	1004	T	___1	LSCATNS(0.071)T(0.098)T(0.52)DS(0.272)S(0.038)KMSLK	9	TLYNLSKLSCATNSTTDSSKMSLKRNIWYNN
PF3D7_0202000	KAHRP	knob-associated histidine-rich protein	0.316248	0.225787	0.542035	0.15333	0.298244	0.58534	0.49873	PF3D7_0202000	472	S	___2	S(0.001)DGS(0.999)KAHEK	4	ENKNKEKTNNSKSDGSKAHEKKENETKNTAG
PF3D7_1308200	cpsSII	carbamoyl phosphate synthetase	0.316227	3.35474	3.67097	3.52072	3.18876	3.60405	3.73788	PF3D7_1308200	334	S	___1	DLHNCNFSNS(0.078)S(0.92)DKNDS(0.002)FFK	11	EEYLKDLHNCNFSNSSDKNDSFFKLYGICEY
PF3D7_1233200.2-p1		conserved Plasmodium protein, unknown function	0.315987	-1.57588	-1.2599	-1.59397	-1.55779	-1.22842	-1.29137	PF3D7_1233200.2-p1;PF3D7_1233200	2562;2569	T	___1	GIT(1)HDNEKKNVENNK	3	NNYPNNINTNIYKGITHDNEKKNVENNKILK
PF3D7_0209100	PATPL1	phospholipase A2, putative	0.315987	1.2953	1.61129	1.31285	1.27776	1.61154	1.61104	PF3D7_0209100	38	S	___2	EKQVY(0.097)S(0.941)GS(0.918)ET(0.044)QNAENEYSK	8	EKDDSYEREKQVYSGSETQNAENEYSKLRAQ
PF3D7_1445400	CLK1	protein serine/threonine kinase-1	0.315967	0.304838	0.620805	0.267241	0.342436	0.69882	0.542789	PF3D7_1445400	252	S	___1	NKS(0.998)IS(0.002)R	3	SRHNIYRYHNGNKNKSISRWEDNYTYKDIYQ
PF3D7_1002000		Plasmodium exported protein (hyp2), unknown function	0.315807	1.57387	1.88968	1.62	1.52773	1.75736	2.02199	PF3D7_1002000	332	S	___1	KES(1)IYK	3	VEKLIDENRELIKKESIYKNKLKEDNIEVEK
PF3D7_1107800	ApiAP2	AP2 domain transcription factor, putative	0.315787	0.729888	1.04568	0.823641	0.636135	0.970451	1.1209	PF3D7_1107800	385	S	___1	NNS(0.022)S(0.135)S(0.843)YKEDVIK	5	GKNKYNINCNKNNSSSYKEDVIKSLNCQYKE
PF3D7_0923400		conserved Plasmodium protein, unknown function	0.315513	1.0863	1.40182	1.0553	1.11731	1.31562	1.48801	PF3D7_0923400	74	S	___2	GKT(0.997)QS(0.944)Y(0.067)RS(0.978)Y(0.014)EYK	5	EHDIYEDNYSRGKTQSYRSYEYKLEHIMKKK
PF3D7_1310400		conserved Plasmodium protein, unknown function	0.315263	-0.625732	-0.31047	-0.523939	-0.727526	-0.28409	-0.336849	PF3D7_1310400	187	S	___1	SELFIKEDKS(1)EEEINNNLINK	10	IIDLKKSELFIKEDKSEEEINNNLINKFYGD
PF3D7_0627800	ACS	acetyl-CoA synthetase, putative	0.315052	0.539124	0.854176	0.559752	0.518496	0.883181	0.825171	PF3D7_0627800	890	S	___1	NELHNNS(1)PFLICSNNITDIEEFKK	7	VNSNNNNNRNELHNNSPFLICSNNITDIEEF
PF3D7_1218900		conserved Plasmodium protein, unknown function	0.314997	-0.626712	-0.311715	-0.622139	-0.631285	-0.35565	-0.26778	PF3D7_1218900	225	S	___1	MNS(0.039)YNWDS(0.528)Y(0.419)FT(0.014)QDKEIYK	8	NNVTHKVRMNSYNWDSYFTQDKEIYKKLNVS
PF3D7_0729100		conserved Plasmodium protein, unknown function	0.314713	3.82566	4.14037	3.91266	3.73866	4.05343	4.22731	PF3D7_0729100	1581	S	___1	GVLYDSLS(0.999)DSYNYR	8	KIQNSKEKGVLYDSLSDSYNYRRKENNMRRG
PF3D7_0704400		phosphoinositide-binding protein, putative	0.314178	-0.591578	-0.2774	-0.46283	-0.720325	-0.218559	-0.336241	PF3D7_0704400	749	S	___1	AYPY(0.005)Y(0.047)ES(0.124)S(0.124)GS(0.7)LEMNK	10	QFDDKRAYPYYESSGSLEMNKGKIIYDNMGK
PF3D7_1026800	RPS2	40S ribosomal protein S2	0.314102	-0.394637	-0.0805349	-0.275749	-0.513525	0.0167599	-0.17783	PF3D7_1026800	222	T	___1	NLANEENT(0.098)PT(0.958)APHLIENQY(0.925)AAEAPY(0.017)DEWT(0.002)K	10	EQFELKNLANEENTPTAPHLIENQYAAEAPY
PF3D7_1217200	MRD1	multiple RNA-binding domain-containing protein 1, putative	0.313938	0.607013	0.920951	0.587961	0.626064	0.943661	0.898241	PF3D7_1217200	299	S	___2	SSELLLDDAS(0.999)NT(0.002)HS(0.999)NNEDNALEWLK	10	DQQIIKSSELLLDDASNTHSNNEDNALEWLK
PF3D7_1217200	MRD1	multiple RNA-binding domain-containing protein 1, putative	0.313938	0.607013	0.920951	0.587961	0.626064	0.943661	0.898241	PF3D7_1217200	303	S	___2	SSELLLDDASNTHS(1)NNEDNALEWLK	14	IKSSELLLDDASNTHSNNEDNALEWLKEISK
PF3D7_0609700	KIC6	conserved Plasmodium protein, unknown function	0.313928	2.86501	3.17894	2.97322	2.75681	3.11136	3.24652	PF3D7_0609700	1100	S	___2	KS(1)DVS(0.999)DFT(0.001)FNK	2	SDGSNSVVNIKYEKKSDVSDFTFNKYKNVRD
PF3D7_1440800	MFS6	major facilitator superfamily domain-containing protein, putative	0.313908	0.977873	1.29178	1.02871	0.927034	1.23736	1.3462	PF3D7_1440800	328	S	___1	NEKNS(0.796)S(0.204)DGIFNNDK	5	ENNTNNYIVNKNEKNSSDGIFNNDKIFKYYS
PF3D7_1419000		conserved Plasmodium protein, unknown function	0.313643	0.865123	1.17877	1.02025	0.709995	1.21372	1.14381	PF3D7_1419000	679	S	___1	IS(1)PLGIK	2	NESIKKINRICQSRISPLGIKDSIKKDEKNK
PF3D7_0825000		conserved Plasmodium protein, unknown function	0.313639	0.845432	1.15907	0.95801	0.732855	1.1785	1.13964	PF3D7_0825000	848	S	___1	VNDDIHEDVKS(1)VNIGNEIDENRK	11	ILKNKVNDDIHEDVKSVNIGNEIDENRKIKK
PF3D7_0306800	CCT2	T-complex protein 1 subunit beta	0.313592	0.265973	0.579565	0.33497	0.196976	0.599091	0.56004	PF3D7_0306800	317	S	___1	ENNVMTIEHS(1)DFDGMER	10	PEQIFRENNVMTIEHSDFDGMERLANCLDAE
PF3D7_1461600	SF3B2	splicing factor 3B subunit 2, putative	0.313262	-2.34363	-2.03037	-2.59609	-2.09118	-2.0176	-2.04314	PF3D7_1461600	147	S	___1	RPS(1)VMK	3	KKNISKKTKKLLKRPSVMKLKEFAPKPELVE
PF3D7_1110400		RNA-binding protein, putative	0.312932	-1.27417	-0.96124	-1.21129	-1.33706	-0.9105	-1.01198	PF3D7_1110400	1243	S	___1	DES(0.634)RRT(0.366)ADDR	3	SRRDESRREESRRDESRRTADDRKDDHADSV
PF3D7_0817300		conserved Plasmodium protein, unknown function	0.312577	-1.45417	-1.14159	-1.55263	-1.35571	-0.96628	-1.3169	PF3D7_0817300	29	S	___1	NNSSNSSNENNNNDENVS(1)LHAER	18	SSNSSNENNNNDENVSLHAERNNETNCTKGN
PF3D7_0617100		AP-2 complex subunit alpha, putative	0.312573	-2.80549	-2.49291	-2.83936	-2.77162	-2.47431	-2.51152	PF3D7_0617100	472	Y	___2	S(0.454)FS(0.488)KNS(0.101)IY(0.574)S(0.291)HS(0.092)K	8	NSSNIFKKSFSKNSIYSHSKKNKDILRNEKS
PF3D7_1235300	NOT4	CCR4-NOT transcription complex subunit 4, putative	0.312109	-0.079668	0.232441	0.0883198	-0.247656	0.273602	0.19128	PF3D7_1235300	838	S	___1	NES(1)EEQKKENDSTDTK	3	KNNEEDRNKIITKNESEEQKKENDSTDTKKN
PF3D7_1139300	ApiAP2	AP2 domain transcription factor, putative	0.312102	-0.606492	-0.29439	-0.4562	-0.756784	-0.28219	-0.306589	PF3D7_1139300	1800	S	___2	S(1)NEKLENILDGGVNMR	1	SFDKCSNENSVCINKSNEKLENILDGGVNMR
PF3D7_1307800		fork head domain protein, putative	0.311997	2.76662	3.07862	2.8216	2.71164	3.11215	3.04508	PF3D7_1307800	265	T	___1	NIT(1)S(1)EDEEMKHHK	3	KDNSYYDSKRKYRNITSEDEEMKHHKTVDHN
PF3D7_1107800	ApiAP2	AP2 domain transcription factor, putative	0.311828	0.964183	1.27601	0.953791	0.974575	1.22445	1.32757	PF3D7_1107800	1041	S	___1	LECS(0.001)S(0.087)AS(0.911)DINK	7	KNYYDNKLKLECSSASDINKFLQDYKLNDDD
PF3D7_0501400	FIRA	interspersed repeat antigen	0.311673	1.2425	1.55417	1.32916	1.15583	1.58949	1.51885	PF3D7_0501400	724	S	___1	KPS(1)LESVK	3	RGNKNDKKSKNEKKPSLESVKQNADEQKEQP
PF3D7_1438400	MCA2	metacaspase-like protein	0.311518	0.851738	1.16326	0.88471	0.818766	1.07439	1.25212	PF3D7_1438400	286	S	___1	NS(0.004)S(0.996)FDNIYTR	3	IMQYYNSNLKNYRNSSFDNIYTRYNNNNNNN
PF3D7_1366400	RHOP148	rhoptry protein RHOP148	0.311453	2.91071	3.22216	2.98794	2.83348	3.15723	3.28709	PF3D7_1366400	221	S	___1	YNS(0.282)DS(0.567)GIGVT(0.151)AK	5	NIGEMQTSTNKYNSDSGIGVTAKTNTDINKN
PF3D7_1227700	KIC2	conserved Plasmodium protein, unknown function	0.311392	2.35988	2.67127	2.39074	2.32902	2.67242	2.67012	PF3D7_1227700	101	S	___1	ECNDS(1)HKDISLSR	5	CNTNIILPIVKECNDSHKDISLSRNENSIHN
PF3D7_1025000	EPS15	formin 2, putative	0.311073	1.65368	1.96475	1.73378	1.57357	1.89765	2.03185	PF3D7_1025000	972	S	___3	HLENYIS(0.003)KDNS(0.997)LKS(1)VDNS(0.464)S(0.536)	11	ENDMKHLENYISKDNSLKSVDNSS_______
PF3D7_1025000	EPS15	formin 2, putative	0.311073	1.65368	1.96475	1.73378	1.57357	1.89765	2.03185	PF3D7_1025000	975	S	___3	HLENYIS(0.003)KDNS(0.997)LKS(1)VDNS(0.464)S(0.536)	14	MKHLENYISKDNSLKSVDNSS__________
PF3D7_1025000	EPS15	formin 2, putative	0.311073	1.65368	1.96475	1.73378	1.57357	1.89765	2.03185	PF3D7_1025000	980	S	___3	HLENYIS(0.003)KDNS(0.997)LKS(1)VDNS(0.464)S(0.536)	19	NYISKDNSLKSVDNSS_______________
PF3D7_0505800	SUMO	small ubiquitin-related modifier	0.311048	2.07251	2.38356	2.14907	1.99595	2.35196	2.41516	PF3D7_0505800	6	S	___1	GDDDS(1)AVNNNGSSPVNNQGEHIQVK	5	__________MGDDDSAVNNNGSSPVNNQGE
PF3D7_0831000	GEXP09	Plasmodium exported protein (PHISTb), unknown function	0.310987	1.65702	1.96801	1.65092	1.66311	1.88676	2.04925	PF3D7_0831000	109	S	___1	DICNEGKDDNIS(1)NKWYEENK	12	KNIKDICNEGKDDNISNKWYEENKRSLNGEY
PF3D7_0606000	KIC1	conserved Plasmodium protein, unknown function	0.310931	-0.195927	0.115005	-0.112999	-0.278854	0.0303898	0.199619	PF3D7_0606000	767	S	___1	YVES(1)GGGVNMNIYTK	4	VLLDDHKKKEEKYVESGGGVNMNIYTKEEHD
PF3D7_0603400	TEX1	trophozoite exported protein 1	0.310927	0.175133	0.48606	0.201981	0.148285	0.453211	0.518909	PF3D7_0603400	272	S	___1	S(0.856)YS(0.144)GDEK	1	YDIHNERGEMLDKGKSYSGDEKINTSDNAKS
PF3D7_1328300		conserved Plasmodium protein, unknown function	0.310773	-2.53195	-2.22118	-2.72573	-2.33817	-2.35205	-2.09031	PF3D7_1328300	40	S	___2	EVELMETIENLS(0.857)DDIGS(0.108)NNFS(0.017)Y(0.018)DSNDSSK	12	RSTKEVELMETIENLSDDIGSNNFSYDSNDS
PF3D7_0401800	PfD80	Plasmodium exported protein (PHISTb), unknown function	0.310597	-0.252012	0.0585852	-0.22381	-0.280214	0.0101299	0.10704	PF3D7_0401800	81	T	___1	RS(0.037)PS(0.386)T(0.464)AS(0.085)T(0.028)S(0.04)T(0.931)S(0.028)LR	10	LASTTKRSPSTASTSTSLRSASTASTASTLR
PF3D7_1107300	PAIP1	polyadenylate-binding protein-interacting protein 1, putative	0.310037	0.609188	0.919225	0.754551	0.463825	1.04031	0.79814	PF3D7_1107300	1427	S	___2	LS(0.999)VS(0.001)SIYEGSNNEK	2	NNNNNNNNNKKKEKLSVSSIYEGSNNEKNQN
PF3D7_1425800		conserved Plasmodium protein, unknown function	0.310013	-1.70438	-1.39436	-1.64579	-1.76296	-1.404	-1.38473	PF3D7_1425800	483	S	___1	LGFY(0.284)S(0.716)NEES(1)DSHDIK	9	IKNIKMRLGFYSNEESDSHDIKCLENDDDND
PF3D7_0206300	AROM	pentafunctional AROM polypeptide, putative, pseudogene	0.309937	2.60572	2.91566	2.65043	2.561	2.92448	2.90683	PF3D7_0206300	1952	S	___1	GS(0.5)T(0.5)PDEKYK	2	INLLHCTKKKRPQRGSTPDEKYKGGEIKGND
PF3D7_1308200	cpsSII	carbamoyl phosphate synthetase	0.309752	-1.16282	-0.853065	-1.01933	-1.3063	-0.779428	-0.926701	PF3D7_1308200	317	S	___1	MNLIT(0.008)S(0.991)S(0.884)EEY(0.117)LK	6	VINHTLLRDKMNLITSSEEYLKDLHNCNFSN
PF3D7_0509100	SMC4	structural maintenance of chromosomes protein 4, putative	0.309707	-1.3864	-1.0767	-1.40492	-1.36789	-1.16106	-0.992331	PF3D7_0509100	237	S	___1	GNNKDEEEET(0.016)Y(0.046)FS(0.938)GREEDEK	13	SEKGNNKDEEEETYFSGREEDEKLHKRCNNI
PF3D7_1468100		conserved Plasmodium protein, unknown function	0.309677	-2.00076	-1.69108	-2.0302	-1.97132	-1.86789	-1.51427	PF3D7_1468100	2452	S	___1	NAQSPNNDNDQNEVVGANEREDDS(0.959)T(0.041)NR	24	NDQNEVVGANEREDDSTNRNYNNGKSSNEEE
PF3D7_1410200	CTPS	cytidine triphosphate synthetase	0.309671	0.653934	0.963605	0.691341	0.616526	0.921021	1.00619	PF3D7_1410200	398	T	___2	YSYENFHENS(0.831)S(0.583)T(0.585)EK	12	KARKYSYENFHENSSTEKIIFVDDTTSDEDY
PF3D7_0420300	ApiAP2	AP2 domain transcription factor, putative	0.309413	-0.904247	-0.594834	-0.701929	-1.10657	-0.645369	-0.5443	PF3D7_0420300	1401	S	___1	SSNPQSTDNYS(0.98)S(0.02)EEYMQR	11	KYHLRSSNPQSTDNYSSEEYMQRSSMRTRGA
PF3D7_1016400	FIKK10.1	serine/threonine protein kinase, FIKK family	0.309118	-4.93276	-4.62364	-5.01049	-4.85503	-4.99276	-4.25452	PF3D7_1016400	507	S	___1	ICEPLEQLS(0.982)PIT(0.018)DLDER	9	RKYIRMKICEPLEQLSPITDLDERAPFYFDV
PF3D7_1021700		conserved Plasmodium membrane protein, unknown function	0.309067	-0.0171967	0.29187	0.00187111	-0.0362644	0.308941	0.274799	PF3D7_1021700	350	S	___1	DQNTNCT(0.001)YNS(0.999)DHVPENSLK	10	KNIFQKDQNTNCTYNSDHVPENSLKGTNEMN
PF3D7_1105600	PTEX88	translocon component PTEX88	0.309018	-2.07396	-1.76494	-2.12533	-2.02258	-1.90619	-1.62369	PF3D7_1105600	263	S	___1	IVGIS(0.997)AS(0.003)R	5	KNIYTFNNNDKIVGISASRHTLYNNNNDMVD
PF3D7_0418700		RNA-binding protein NOB1, putative	0.308932	0.816023	1.12496	0.852671	0.779375	1.07834	1.17157	PF3D7_0418700	228	S	___1	KEIIYLEHDKHS(1)QGDDNS(1)LGK	18	IIYLEHDKHSQGDDNSLGKNYKLSHIDDDIS
PF3D7_1304400		conserved Plasmodium protein, unknown function	0.308863	0.294578	0.60344	0.316841	0.272314	0.681601	0.52528	PF3D7_1304400	472	T	___1	NHHNVLDAQEKDEEDAEHT(1)EDEEDFSHIISNIR	19	NVLDAQEKDEEDAEHTEDEEDFSHIISNIRN
PF3D7_1147300		conserved Plasmodium protein, unknown function	0.308843	0.237032	0.545875	0.20496	0.269104	0.66939	0.422359	PF3D7_1147300	870	S	___1	MDS(1)LKDR	3	SSNNSTTELSVSKMDSLKDRELRNEGTDTKV
PF3D7_1312900	EIF4G	eukaryotic translation initation factor 4 gamma	0.308827	-0.546277	-0.23745	-0.488049	-0.604506	-0.142559	-0.33234	PF3D7_1312900	322	S	___1	NNSIDMNNS(1)NINNYTNQQTR	9	NVEEHLRNNSIDMNNSNINNYTNQQTRFSSF
PF3D7_1442900	ARFGEF	protein transport protein SEC7, putative	0.308787	-4.24893	-3.94014	-4.30305	-4.19481	-4.26763	-3.61265	PF3D7_1442900	969	S	___2	S(0.999)FLT(0.001)SENAAER	1	DDDIIEYSSSLYENRSFLTSENAAERGSSIK
PF3D7_1442900	ARFGEF	protein transport protein SEC7, putative	0.308787	-4.24893	-3.94014	-4.30305	-4.19481	-4.26763	-3.61265	PF3D7_1442900	972	T	___2	S(0.999)FLT(0.933)S(0.069)ENAAER	4	IIEYSSSLYENRSFLTSENAAERGSSIKSNS
PF3D7_0905800		conserved Plasmodium protein, unknown function	0.308739	-1.6908	-1.38206	-1.58375	-1.79786	-1.45622	-1.30791	PF3D7_0905800	744	S	___2	YINDNY(0.005)Y(0.025)NNNS(0.829)MIPNKY(0.086)S(0.066)PDGRY(0.001)S(0.858)PS(0.125)NLHT(0.005)K	11	NNNNKYINDNYYNNNSMIPNKYSPDGRYSPS
PF3D7_0529800		conserved Plasmodium protein, unknown function	0.308688	1.62348	1.93217	1.65718	1.58978	1.9675	1.89684	PF3D7_0529800	638	S	___1	S(1)VENIIKDKEK	1	STKEVETCEEVEKRKSVENIIKDKEKKLENI
PF3D7_1026000		conserved Plasmodium protein, unknown function	0.308423	2.51497	2.8234	2.50371	2.52624	2.77484	2.87195	PF3D7_1026000	282	S	___1	S(1)CHEINNDEKK	1	QNDDDKKNAHEVDKKSCHEINNDEKKKEVQK
PF3D7_1345400		conserved Plasmodium protein, unknown function	0.308303	2.10648	2.41478	2.14419	2.06877	2.42088	2.40868	PF3D7_1345400	78	S	___1	ENIQYKS(1)DDITAASQIIK	7	IEDSHILNKENIQYKSDDITAASQIIKNDMD
PF3D7_0606000	KIC1	conserved Plasmodium protein, unknown function	0.308152	-0.155497	0.152656	-0.134779	-0.176214	0.0148602	0.290451	PF3D7_0606000	832	S	___2	DVPHVADVDRVNVDEKES(0.999)IS(0.896)LDGT(0.105)GR	18	PHVADVDRVNVDEKESISLDGTGRSARKIIM
PF3D7_0606000	KIC1	conserved Plasmodium protein, unknown function	0.308152	-0.155497	0.152656	-0.134779	-0.176214	0.0148602	0.290451	PF3D7_0606000	834	S	___2	DVPHVADVDRVNVDEKES(0.999)IS(0.896)LDGT(0.105)GR	20	VADVDRVNVDEKESISLDGTGRSARKIIMHP
PF3D7_1027100	MPP10	U3 small nucleolar ribonucleoprotein protein MPP10, putative	0.308147	-0.865487	-0.55734	-0.851259	-0.879715	-0.54096	-0.573719	PF3D7_1027100	142	S	___1	T(0.004)S(0.004)EEKPFS(0.991)EKEK	8	CDDNTFFKTSEEKPFSEKEKEVNKKKKRENN
PF3D7_1218500	DRPC	conserved Plasmodium protein, unknown function	0.307922	1.63058	1.9385	1.66352	1.59764	1.79316	2.08384	PF3D7_1218500	906	S	___2	S(1)RS(1)KELIQEEVK	1	RNHQLSLTDVKINKKSRSKELIQEEVKLQFW
PF3D7_1218500	DRPC	conserved Plasmodium protein, unknown function	0.307922	1.63058	1.9385	1.66352	1.59764	1.79316	2.08384	PF3D7_1218500	908	S	___2	S(1)RS(1)KELIQEEVK	3	HQLSLTDVKINKKSRSKELIQEEVKLQFWAI
PF3D7_1213900		conserved Plasmodium protein, unknown function	0.307582	-0.00452709	0.303055	-0.129999	0.120945	0.25865	0.34746	PF3D7_1213900	378	S	___1	T(0.007)NS(0.993)HGMDYR	3	IENHQDMECHNLRTNSHGMDYRELFNNYHDI
PF3D7_1308200	cpsSII	carbamoyl phosphate synthetase	0.307438	1.22413	1.53157	1.38488	1.06338	1.55434	1.50879	PF3D7_1308200	333	S	___2	DLHNCNFS(0.582)NS(0.64)S(0.763)DKNDS(0.015)FFK	10	SEEYLKDLHNCNFSNSSDKNDSFFKLYGICE
PF3D7_0905300		dynein heavy chain, putative	0.307277	-2.1838	-1.87652	-2.38763	-1.97997	-1.89946	-1.85359	PF3D7_0905300	3350	Y	___1	NDKY(1)GKNLDNIK	4	GKKPLFPTLEKKNDKYGKNLDNIKNEQKDQN
PF3D7_1354300		large subunit rRNA methyltransferase, putative	0.307083	-2.17557	-1.86849	-2.06316	-2.28798	-1.81231	-1.92467	PF3D7_1354300	251	S	___1	QESYLDNNENY(0.001)FS(0.999)DEES(1)NDEEKVGEK	17	ESYLDNNENYFSDEESNDEEKVGEKIDKKKK
PF3D7_0603500	CAX	cation/H+ antiporter	0.307033	-0.718837	-0.411804	-0.729939	-0.707735	-0.462109	-0.3615	PF3D7_0603500	9	T	___1	AT(0.764)S(0.236)YVR	2	_______MVMGRVRATSYVRRTISQPLNKNV
[truncated: 10,781 more rows]
