# Supplementary material for: Physiological febrile heat stress increases cytoadhesion through increased protein trafficking of Plasmodium falciparum surface proteins into the red blood cell
Source: eLife. 2026 May 13;14:RP107860. doi: 10.7554/eLife.107860 (PMC13171106; doi:10.7554/eLife.107860)
Supplement: Figure 3—source data 2. [file elife-107860-fig3-data2.xlsx]

## Sheet: 3D
Classification	Number of Phosphopeptides
No Known Kinase	61
FIKK4.1	10
FIKK10.2	29
Other FIKK	2
