# Supplementary material for: Physiological febrile heat stress increases cytoadhesion through increased protein trafficking of Plasmodium falciparum surface proteins into the red blood cell
Source: eLife. 2026 May 13;14:RP107860. doi: 10.7554/eLife.107860 (PMC13171106; doi:10.7554/eLife.107860)
Supplement: Figure 3—source data 3. [file elife-107860-fig3-data3.xlsx]

## Sheet: 3E
FIKK4.1 (RAP) No Heat	FIKK4.1 (RAP) Heat	FIKK10.2 (RAP) No Heat	FIKK10.2 (RAP) Heat
6.17	16.4	6.68	24.2
5.16	14.11	5.57	20.57
7.36	25.95	9.39	38.85
