# Supplementary material for: Physiological febrile heat stress increases cytoadhesion through increased protein trafficking of Plasmodium falciparum surface proteins into the red blood cell
Source: eLife. 2026 May 13;14:RP107860. doi: 10.7554/eLife.107860 (PMC13171106; doi:10.7554/eLife.107860)
Supplement: Figure 3—source data 4. [file elife-107860-fig3-data4.xlsx]

## Sheet: 3F
FIKK4.1 (RAP) No Heat	FIKK4.1 (RAP) Heat	FIKK10.2 (RAP) No Heat	FIKK10.2 (RAP) Heat
20.14	64.36	25.93	58.22
17.28	51.46	33.22	69.71
29.7	55.91	21.93	48.25
