# Supplementary material for: Physiological febrile heat stress increases cytoadhesion through increased protein trafficking of Plasmodium falciparum surface proteins into the red blood cell
Source: eLife. 2026 May 13;14:RP107860. doi: 10.7554/eLife.107860 (PMC13171106; doi:10.7554/eLife.107860)
Supplement: Figure 5—source data 1. [file elife-107860-fig5-data1.xlsx]

## Sheet: Figure 5B
VAR2CSA-NanoLuc %PfEMP1 (No Heat Stress)	VAR2CSA-NanoLuc %PfEMP1 (Post Heat Stress)
14.59	29.2
12.04	29.14
15.42	24.51
