# Supplementary material for: Physiological febrile heat stress increases cytoadhesion through increased protein trafficking of Plasmodium falciparum surface proteins into the red blood cell
Source: eLife. 2026 May 13;14:RP107860. doi: 10.7554/eLife.107860 (PMC13171106; doi:10.7554/eLife.107860)
Supplement: Figure 5—source data 2. [file elife-107860-fig5-data2.xlsx]

## Sheet: Figure 5E
No Heat Stress, EqtII	Post Heat Stress EqtII	No Heat Stress SAP	Post Heat Stress, SAP	No Heat Stress, NP40	Post Heat Stress NP40
74239	150389	191735	129725	229740	228227
74239	125275	141346	163102	219517	178004
87780	133103	149302	132343	193453	243377
