# Supplementary material for: Physiological febrile heat stress increases cytoadhesion through increased protein trafficking of Plasmodium falciparum surface proteins into the red blood cell
Source: eLife. 2026 May 13;14:RP107860. doi: 10.7554/eLife.107860 (PMC13171106; doi:10.7554/eLife.107860)
Supplement: Figure 6—source data 1. [file elife-107860-fig6-data1.xlsx]

## Sheet: Figure 6C
No Heat Stress, EqtII	Post Heat Stress EqtII	No Heat Stress SAP	Post Heat Stress, SAP	No Heat Stress, NP40	Post Heat Stress NP40
522130	685535	735676	768743	996163	985946
496460	636318	724856	798356	1018050	1031910
544000	709887	744183	750886	982619	947453
