# Supplementary material for: Physiological febrile heat stress increases cytoadhesion through increased protein trafficking of Plasmodium falciparum surface proteins into the red blood cell
Source: eLife. 2026 May 13;14:RP107860. doi: 10.7554/eLife.107860 (PMC13171106; doi:10.7554/eLife.107860)
Supplement: Figure 6—source data 2. [file elife-107860-fig6-data2.xlsx]

## Sheet: Figure 6D
No Heat Stress, EqtII	Post Heat Stress EqtII	No Heat Stress SAP	Post Heat Stress, SAP	No Heat Stress, NP40	Post Heat Stress NP40
929868	953963	1144365	1149942	1411900	1349082
991384	939336	1136116	1195001	1313737	1369212
971574	971339	1147739	1162883	1372572	1305215
