# Supplementary material for: Physiological febrile heat stress increases cytoadhesion through increased protein trafficking of Plasmodium falciparum surface proteins into the red blood cell
Source: eLife. 2026 May 13;14:RP107860. doi: 10.7554/eLife.107860 (PMC13171106; doi:10.7554/eLife.107860)
Supplement: Figure 6—source data 3. [file elife-107860-fig6-data3.xlsx]

## Sheet: Figure 6E
No Heat Stress, EqtII	Post Heat Stress EqtII	No Heat Stress SAP	Post Heat Stress, SAP	No Heat Stress, NP40	Post Heat Stress NP40
489699	795156	949420	959342	1155870	1109138
584165	748435	977010	1006645	1228052	1140532
465364	882643	908122	1004729	1236475	1182650
