# Supplementary material for: Physiological febrile heat stress increases cytoadhesion through increased protein trafficking of Plasmodium falciparum surface proteins into the red blood cell
Source: eLife. 2026 May 13;14:RP107860. doi: 10.7554/eLife.107860 (PMC13171106; doi:10.7554/eLife.107860)
Supplement: Figure 6—source data 4. [file elife-107860-fig6-data4.xlsx]

## Sheet: Figure 6F
No Heat Stress, EqtII	Post Heat Stress EqtII	No Heat Stress SAP	Post Heat Stress, SAP	No Heat Stress, NP40	Post Heat Stress NP40
26640	25000	52240	48900	158580	166540
22880	22760	47100	36000	159660	179600
23180	14720	32400	26540	158660	162500
